# Supplementary material for: DExplore: An Online Tool for Detecting Differentially Expressed Genes from mRNA Microarray Experiments
Source: MDPI journal article supplement (doi:10.3390/biology13050351), 2024-05-16
Supplement: s1 [file s1]

## Instructions for using DExplore's Docker version

To use DExplore from its Docker version, follow these steps:

1. Download and install Docker Desktop on your personal computer. Docker Desktop is a free application provided by Docker® and is compatible with Windows, Mac, and Linux operating systems. You can download it from <https://www.docker.com/products/docker-desktop/>.
2. Create a free account on Docker® to access Docker Hub. Docker Hub enables you to pull existing Docker images, such as DExplore, or push your own images.
3. After installing Docker Desktop and creating a Docker® account, you can pull the DExplore Docker image via Docker Desktop.

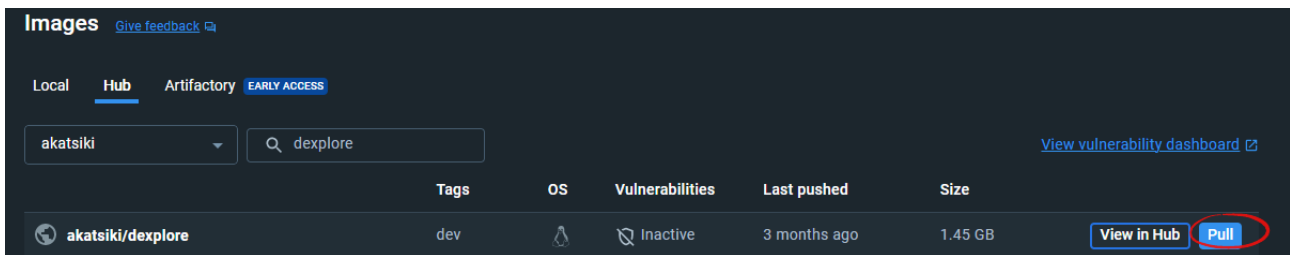

4. Running DExplore's Docker image is straightforward since Docker Desktop operates through a graphical user interface (GUI), eliminating the need for command-line inputs.

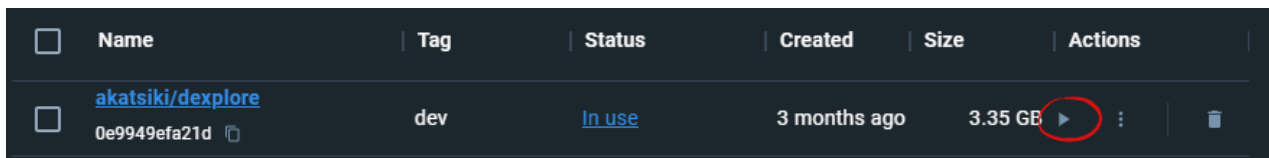

5. We strongly recommend users to configure optional settings as depicted in the following screenshot.

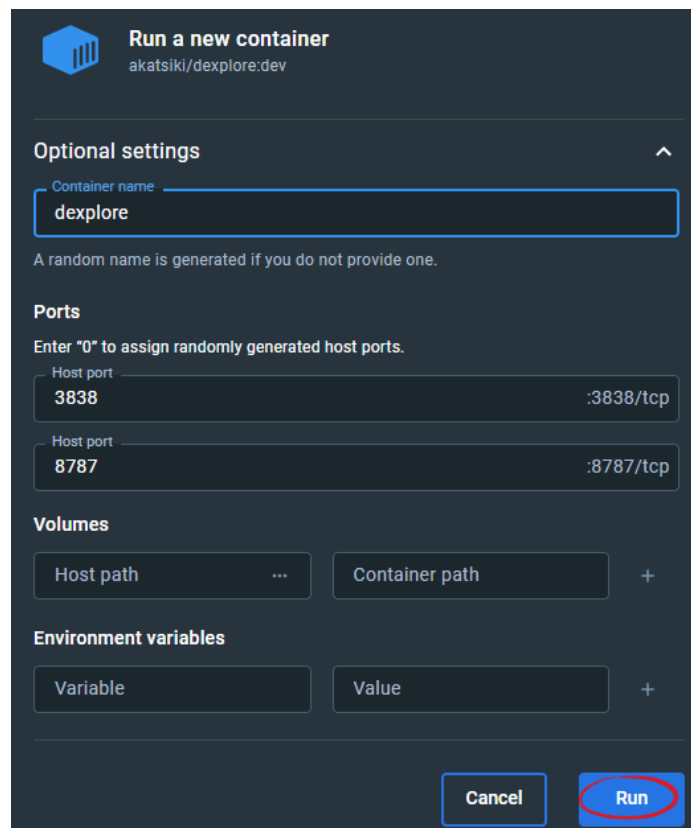

6. After configuring the settings, click the "Run" button. Open a new browser tab and enter "localhost:3838/dexplore/" in the address bar.
7. DExplore will run in the browser, mimicking its online version without any size restrictions or stability issues.

The screenshot shows a web browser window with the address bar displaying 'localhost:3838/dexplore/'. The page title is 'DExplore - Differential Gene Expression Analysis'. The navigation bar includes links for 'Data Input', 'Data Description', 'Results', 'WebGestalt Over-Representation Analysis', and 'About'. The main content area has a light blue background and contains the following elements:

- A heading: 'You can use either an NCBI GEO's accession number OR your own .CEL files'.
- On the left, a form labeled 'Enter a valid GSE accession number \*' with a text input field, a 'Submit' button, and a red asterisk note: '\* This field is mandatory'.
- On the right, a form labeled 'Upload your own .CEL files \*' with a 'Browse...' button, a 'No file selected' message, a 'Submit' button, and a red asterisk note: '\* This field is mandatory'.
- A horizontal separator line with the text: 'Please, refresh DExplore between analyses'.
- At the bottom, a note: 'You can access the source code and/or the docker image using the following links:' followed by two links: 'GitHub link' and 'DockerHub link'.

These steps ensure a smooth and user-friendly experience with DExplore's Docker version.

For troubleshooting, do not hesitate to contact us at [dexplore.app\[at\]gmail.com](mailto:dexplore.app[at]gmail.com).
