# Supplementary material for: DExplore: An Online Tool for Detecting Differentially Expressed Genes from mRNA Microarray Experiments
Source: Biology (Basel). 2024 May 16;13(5):351. doi: 10.3390/biology13050351 (PMC11117493; doi:10.3390/biology13050351)
Supplement: Supplementary file 1 [file biology-13-00351-s001.zip]

Archive with 9 entries (9 files):
- S4. GSE39870_plots.zip
- S5. GSE113427_plots.zip
- Tables S1-S9_DEGs_GSE39870.xlsx
- Tables S10-S24_GO_terms_GSE39870.xlsx
- Tables S25-S33_DEGs_GSE113427.xlsx
- Tables S34-S47_GO_terms_GSE113427.xlsx
- S1. DExplore_User's_Guide.pdf
- S2. Tutorial for DExplore's Docker version.pdf
- S3. CARMAweb analysis.pdf
