# Supplementary material for: DExplore: An Online Tool for Detecting Differentially Expressed Genes from mRNA Microarray Experiments
Source: Biology (Basel). 2024 May 16;13(5):351. doi: 10.3390/biology13050351 (PMC11117493; doi:10.3390/biology13050351)
Supplement: Supplementary file 1 [file biology-13-00351-s001.zip › Tables S1-S9_DEGs_GSE39870.xlsx]

## Sheet: Table S1.DExplore_GSE39870_all
Supplementary Table S1. List of all DEGs detected by DExplore using GSE39870 dataset
Legend: probeID, the ID of the probe for GPL571 ([HG-U133A_2] Affymetrix Human Genome U133A 2.0 Array); gene symbol, the gene symbol from the NCBI's Gene database; logFC, the log2-fold change for the corresponding probe; AveExpr, the average expression level for the corresponding probe across all the arrays; t, the moderated t-statistic, i.e., the ratio of the log2-fold change to its standard err…
probeID	gene symbol	logFC	AveExpr	t	P.Value	adj.P.Val	B
202240_at	PLK1	-1.59	8.48	-19.7	6.54e-07	0.002	6.57
205303_at	KCNJ8	-1.46	7.64	-18.5	9.8e-07	0.002	6.27
207813_s_at	FDXR	2.13	8.78	20.8	4.72e-07	0.002	6.81
218346_s_at	SESN1	1.69	9.02	18.8	8.89e-07	0.002	6.34
205436_s_at	H2AX	-1.5	11.9	-18	1.17e-06	0.00209	6.13
203409_at	DDB2	1.43	10.4	16.8	1.8e-06	0.00281	5.79
209294_x_at	TNFRSF10B	1.83	9.08	16.5	1.97e-06	0.00281	5.71
206140_at	LHX2	-1.75	6.87	-16.2	2.22e-06	0.00288	5.61
200974_at	ACTA2	1.23	8.44	14	5.42e-06	0.00297	4.84
202393_s_at	KLF10	1.33	9.84	15	3.55e-06	0.00297	5.21
202899_s_at	SRSF3	-1.26	11.1	-14.6	4.28e-06	0.00297	5.05
203335_at	PHYH	1.42	8.24	14.1	5.2e-06	0.00297	4.87
203764_at	DLGAP5	-1.19	8.28	-14.5	4.37e-06	0.00297	5.03
204780_s_at	FAS	2.25	7.35	14.1	5.24e-06	0.00297	4.87
204962_s_at	CENPA	-1.37	8.26	-14.1	5.31e-06	0.00297	4.86
209375_at	XPC	1.31	10.4	15.2	3.24e-06	0.00297	5.29
209642_at	BUB1	-1.21	7.57	-14.9	3.67e-06	0.00297	5.18
215785_s_at	CYFIP2	1.23	8.17	14.7	4.05e-06	0.00297	5.09
218007_s_at	RPS27L	1.21	12.1	14.3	4.81e-06	0.00297	4.94
218769_s_at	ANKRA2	1.33	7.58	15.5	2.96e-06	0.00297	5.37
203418_at	CCNA2	-1.07	8.58	-13.5	6.76e-06	0.00344	4.64
205046_at	CENPE	-1.14	7.11	-13.2	8.02e-06	0.00347	4.48
218704_at	RNF43	-1.14	8.23	-13.3	7.62e-06	0.00347	4.53
218755_at	KIF20A	-1.71	8.72	-13.2	7.75e-06	0.00347	4.51
220651_s_at	MCM10	-1.05	8.11	-12.9	9.18e-06	0.00385	4.36
201060_x_at	STOM	1.27	10.6	12.6	1.03e-05	0.00399	4.25
209431_s_at	PATZ1	-1.29	7.77	-12.6	1.03e-05	0.00399	4.24
219099_at	TIGAR	1.9	9.21	12.5	1.1e-05	0.00404	4.18
220441_at	DNAJC22	-1.1	7.9	-12.5	1.1e-05	0.00404	4.19
200671_s_at	SPTBN1	-1.01	7.63	-12.4	1.16e-05	0.00409	4.14
204244_s_at	DBF4	-1.01	8.16	-12.2	1.28e-05	0.00412	4.05
201896_s_at	PSRC1	-0.967	8.73	-11.6	1.72e-05	0.00426	3.76
204822_at	TTK	-1.08	7.68	-12	1.44e-05	0.00426	3.94
205756_s_at	F8	1	7.35	11.8	1.55e-05	0.00426	3.87
207828_s_at	CENPF	-1.06	8.41	-11.5	1.82e-05	0.00426	3.71
209891_at	SPC25	-1.14	7.5	-11.9	1.51e-05	0.00426	3.89
210052_s_at	TPX2	-0.954	9.74	-11.5	1.85e-05	0.00426	3.69
210166_at	TLR5	1	6.68	11.5	1.83e-05	0.00426	3.7
210609_s_at	TP53I3	2.63	9.5	11.5	1.78e-05	0.00426	3.73
218355_at	KIF4A	-0.971	8.54	-11.6	1.74e-05	0.00426	3.75
219544_at	BORA	-1.01	7.01	-11.7	1.63e-05	0.00426	3.81
219936_s_at	GPR87	2.98	7.49	11.8	1.53e-05	0.00426	3.88
219990_at	E2F8	-1.47	6.62	-11.8	1.52e-05	0.00426	3.88
202672_s_at	ATF3	1.15	7.87	11.4	1.96e-05	0.00444	3.64
201993_x_at	HNRNPDL	-1.08	9.53	-11	2.37e-05	0.00492	3.45
206222_at	TNFRSF10C	2.97	8.55	11	2.38e-05	0.00492	3.45
208796_s_at	CCNG1	1.53	10.7	11	2.41e-05	0.00492	3.44
208033_s_at	ZFHX3	-0.997	7.57	-10.8	2.59e-05	0.00517	3.37
221139_s_at	CSAD	0.921	7.99	10.8	2.61e-05	0.00517	3.36
203666_at	CXCL12	1.22	9.65	10.8	2.69e-05	0.00522	3.33
204566_at	PPM1D	0.923	11.6	10.7	2.79e-05	0.00532	3.29
204825_at	MELK	-0.862	9.33	-10.7	2.86e-05	0.00532	3.27
207332_s_at	TFRC	0.889	12.3	10.6	2.95e-05	0.00533	3.24
218009_s_at	PRC1	-1.01	10.7	-10.6	2.91e-05	0.00533	3.25
200073_s_at	HNRNPD	-1.44	9.59	-10.4	3.41e-05	0.00533	3.1
200730_s_at	PTP4A1	1.04	10.3	10.4	3.24e-05	0.00533	3.14
201294_s_at	WSB1	0.965	8.53	10.3	3.44e-05	0.00533	3.09
202107_s_at	MCM2	-0.935	10.7	-10.5	3.22e-05	0.00533	3.15
202307_s_at	TAP1	1.63	7.93	10.4	3.31e-05	0.00533	3.12
204066_s_at	AGAP1	-0.868	8.51	-10.4	3.34e-05	0.00533	3.12
209075_s_at	ISCU	1.03	10.6	10.5	3.11e-05	0.00533	3.19
212993_at	NACC2	0.87	9.29	10.5	3.12e-05	0.00533	3.18
219258_at	TIPIN	-1.44	7.3	-10.5	3.16e-05	0.00533	3.17
219628_at	ZMAT3	1.21	8.17	10.5	3.11e-05	0.00533	3.19
203972_s_at	PEX3	-0.996	7.95	-10.3	3.61e-05	0.00544	3.04
204315_s_at	GTSE1	-0.928	7.56	-10.3	3.62e-05	0.00544	3.04
201930_at	MCM6	-1.12	10.4	-10.2	3.74e-05	0.00544	3
203625_x_at	SKP2	-0.97	7.35	-10.2	3.67e-05	0.00544	3.02
202870_s_at	CDC20	-1.28	8.81	-10.2	3.86e-05	0.00551	2.97
218611_at	IER5	1.36	9.79	10	4.16e-05	0.00588	2.9
203721_s_at	UTP18	-0.855	9.6	-9.98	4.26e-05	0.00596	2.87
203887_s_at	THBD	1.32	8.35	9.96	4.31e-05	0.00597	2.86
208478_s_at	BAX	1.13	8.43	9.93	4.39e-05	0.00597	2.84
211042_x_at	MCAM	-0.786	7.64	-9.94	4.38e-05	0.00597	2.85
203725_at	GADD45A	1.99	8.87	9.91	4.45e-05	0.00599	2.83
213222_at	PLCB1	-1.1	7.94	-9.76	4.89e-05	0.00645	2.74
219148_at	PBK	-1.04	8.86	-9.74	4.93e-05	0.00645	2.73
200771_at	LAMC1	0.777	8.98	9.62	5.32e-05	0.00659	2.65
207695_s_at	IGSF1	0.806	8.12	9.62	5.33e-05	0.00659	2.65
212378_at	GART	-0.886	7.4	-9.64	5.26e-05	0.00659	2.66
213188_s_at	RIOX2	-0.873	6.84	-9.61	5.36e-05	0.00659	2.64
219918_s_at	ASPM	-1.25	8.25	-9.58	5.45e-05	0.00664	2.63
219928_s_at	CABYR	0.919	7.13	9.49	5.77e-05	0.00698	2.57
200904_at	HLA-E	0.835	8.94	9.44	5.96e-05	0.00715	2.54
201891_s_at	B2M	0.856	11.6	9.41	6.05e-05	0.00719	2.52
202017_at	EPHX1	0.891	10.3	9.36	6.28e-05	0.00719	2.48
205531_s_at	GLS2	2.46	8.05	9.34	6.32e-05	0.00719	2.48
221824_s_at	MARCHF8	1	7.28	9.35	6.28e-05	0.00719	2.48
218634_at	PHLDA3	0.789	9.73	9.29	6.54e-05	0.00729	2.44
202954_at	UBE2C	-0.845	10.3	-9.16	7.1e-05	0.00739	2.36
203276_at	LMNB1	-1.23	10	-9.13	7.25e-05	0.00739	2.34
203455_s_at	SAT1	1.01	9.96	9.15	7.15e-05	0.00739	2.35
205266_at	LIF	0.749	7.58	9.16	7.1e-05	0.00739	2.36
205345_at	BARD1	-0.809	8.41	-9.16	7.13e-05	0.00739	2.35
207165_at	HMMR	-0.983	8.21	-9.12	7.31e-05	0.00739	2.33
210779_x_at	GEMIN2	-1.02	7.36	-9.24	6.77e-05	0.00739	2.41
215068_s_at	FBXL18	0.783	8.84	9.16	7.12e-05	0.00739	2.36
218559_s_at	MAFB	1.22	8.62	9.17	7.05e-05	0.00739	2.37
218970_s_at	CUTC	-1	7.4	-9.23	6.82e-05	0.00739	2.4
219361_s_at	AEN	0.881	9.45	9.11	7.37e-05	0.00739	2.32
211715_s_at	BDH1	-0.899	8.11	-9.08	7.5e-05	0.00739	2.3
222087_at	PVT1	0.789	7.42	9.08	7.52e-05	0.00739	2.3
219518_s_at	ELL3	0.809	7.42	9.05	7.64e-05	0.00746	2.29
208795_s_at	MCM7	-0.901	10	-9.03	7.72e-05	0.00749	2.27
214537_at	H1-3	-0.777	7.97	-8.97	8.04e-05	0.00759	2.23
214746_s_at	ZNF467	-0.822	8.07	-8.95	8.17e-05	0.00759	2.22
219342_at	CASD1	1.07	7.54	8.98	8e-05	0.00759	2.24
202779_s_at	UBE2S	-0.912	11	-8.86	8.68e-05	0.00774	2.15
204827_s_at	CCNF	-0.816	7.13	-8.81	8.98e-05	0.00774	2.12
206364_at	KIF14	-1.51	7.38	-8.79	9.06e-05	0.00774	2.11
209189_at	FOS	1.58	8.41	8.9	8.45e-05	0.00774	2.18
209449_at	LSM2	-0.709	9.2	-8.82	8.91e-05	0.00774	2.13
211832_s_at	MDM2	0.819	6.87	8.85	8.74e-05	0.00774	2.15
212875_s_at	C2CD2	-1.04	7.13	-8.82	8.87e-05	0.00774	2.13
215136_s_at	EXOSC8	-0.823	8.07	-8.8	9.03e-05	0.00774	2.11
217996_at	PHLDA1	-0.899	7.26	-8.89	8.48e-05	0.00774	2.18
218124_at	RETSAT	0.798	8.17	8.76	9.28e-05	0.00779	2.08
220233_at	FBXO17	-0.726	7.71	-8.76	9.29e-05	0.00779	2.08
206247_at	MICB	1.02	9.11	8.73	9.42e-05	0.0078	2.07
203062_s_at	MDC1	-0.786	7.5	-8.72	9.54e-05	0.00782	2.06
202464_s_at	PFKFB3	-1.14	7.1	-8.55	0.000107	0.00795	1.94
202705_at	CCNB2	-0.806	8.94	-8.54	0.000108	0.00795	1.93
203159_at	GLS	0.758	8.37	8.56	0.000106	0.00795	1.95
203362_s_at	MAD2L1	-0.691	8.9	-8.6	0.000103	0.00795	1.98
208814_at	HSPA4	0.764	8.29	8.54	0.000108	0.00795	1.93
209025_s_at	SYNCRIP	-0.841	9.63	-8.55	0.000107	0.00795	1.94
210933_s_at	FSCN1	2.03	6.75	8.6	0.000103	0.00795	1.98
212111_at	STX12	0.766	8.29	8.57	0.000105	0.00795	1.96
218412_s_at	GTF2IRD1	-0.69	8.81	-8.62	0.000102	0.00795	1.99
218480_at	AGBL5	0.724	8.1	8.56	0.000106	0.00795	1.95
218782_s_at	ATAD2	-0.836	9.46	-8.53	0.000108	0.00795	1.93
221591_s_at	PIMREG	-0.764	8.68	-8.66	9.93e-05	0.00795	2.02
221640_s_at	PIDD1	0.956	6.89	8.63	0.000101	0.00795	2
203420_at	FAM8A1	0.684	8.89	8.51	0.00011	0.008	1.91
206102_at	GINS1	-0.691	9.23	-8.49	0.000111	0.008	1.9
209714_s_at	CDKN3	-0.731	9.28	-8.49	0.000111	0.008	1.9
220295_x_at	DEPDC1	-1.12	7.45	-8.47	0.000113	0.00806	1.88
202284_s_at	CDKN1A	1.5	11.7	8.41	0.000118	0.0083	1.84
204146_at	RAD51AP1	-0.844	7.4	-8.4	0.000119	0.0083	1.83
212403_at	UBE3B	0.713	8.44	8.4	0.000119	0.0083	1.83
213017_at	ABHD3	0.81	7.2	8.4	0.000118	0.0083	1.84
218662_s_at	NCAPG	-0.722	7.24	-8.39	0.000119	0.0083	1.83
204957_at	ORC5	-0.691	8.81	-8.37	0.000121	0.00833	1.81
209421_at	MSH2	-0.781	8.85	-8.37	0.000121	0.00833	1.81
205862_at	GREB1	1.36	9.3	8.36	0.000122	0.00835	1.8
217844_at	CTDSP1	-0.706	10	-8.35	0.000122	0.00835	1.8
202330_s_at	UNG	-0.932	9.16	-8.34	0.000124	0.00838	1.79
207501_s_at	FGF12	-0.987	7.14	-8.34	0.000124	0.00838	1.79
204023_at	RFC4	-0.68	8.72	-8.31	0.000126	0.0084	1.77
205167_s_at	CDC25C	-0.673	7.66	-8.31	0.000126	0.0084	1.77
219512_at	DSN1	-0.764	6.62	-8.31	0.000126	0.0084	1.77
218542_at	CEP55	-0.746	8.68	-8.3	0.000127	0.00841	1.76
204162_at	NDC80	-1.61	7.29	-8.27	0.00013	0.00848	1.74
205053_at	PRIM1	-0.776	9.12	-8.25	0.000132	0.00849	1.73
212992_at	AHNAK2	1.37	6.51	8.25	0.000131	0.00849	1.73
206108_s_at	SRSF6	-0.849	8.5	-8.23	0.000133	0.00853	1.71
204641_at	NEK2	-0.68	7.5	-8.22	0.000135	0.00855	1.7
221268_s_at	SGPP1	0.975	7.96	8.22	0.000135	0.00855	1.7
201555_at	MCM3	-0.949	10.8	-8.19	0.000137	0.00858	1.68
204274_at	EBAG9	-0.8	9.03	-8.18	0.000138	0.00858	1.68
204709_s_at	KIF23	-1.05	7.54	-8.18	0.000138	0.00858	1.68
210778_s_at	MXD4	0.903	8.69	8.18	0.000138	0.00858	1.67
212955_s_at	POLR2I	-0.81	9.94	-8.18	0.000138	0.00858	1.67
222077_s_at	RACGAP1	-0.749	10	-8.17	0.000139	0.00858	1.67
208289_s_at	EI24	1.11	9.68	8.16	0.00014	0.00859	1.66
212977_at	ACKR3	-0.893	8.92	-8.16	0.00014	0.00859	1.66
207017_at	RAB27B	-0.708	6.39	-8.14	0.000142	0.00862	1.65
209048_s_at	ZMYND8	-1.09	9.64	-8.14	0.000143	0.00862	1.64
213302_at	PFAS	-0.669	7.64	-8.14	0.000142	0.00862	1.64
202153_s_at	NUP62	-0.701	9.52	-8.11	0.000145	0.00866	1.62
204958_at	PLK3	0.994	7.35	8.08	0.000148	0.00866	1.6
212543_at	CRYBG1	-0.665	9.16	-8.1	0.000147	0.00866	1.61
212885_at	MPHOSPH10	-0.653	8.65	-8.1	0.000146	0.00866	1.62
216952_s_at	LMNB2	-0.7	9.17	-8.1	0.000147	0.00866	1.61
221931_s_at	SEH1L	-0.777	7.76	-8.08	0.000148	0.00866	1.6
212949_at	NCAPH	-0.817	8.52	-8.03	0.000154	0.0089	1.56
219627_at	ZNF767P	0.742	7.84	8.01	0.000156	0.00899	1.55
212510_at	GPD1L	0.722	10.5	7.99	0.000158	0.00908	1.53
220840_s_at	C1orf112	-0.718	6.78	-7.96	0.000162	0.00922	1.51
206052_s_at	SLBP	-0.66	9.4	-7.95	0.000163	0.00925	1.5
203755_at	BUB1B	-1.28	9.08	-7.94	0.000165	0.00933	1.49
201235_s_at	BTG2	1.16	8.54	7.91	0.000168	0.00946	1.47
203282_at	GBE1	0.674	9.03	7.9	0.00017	0.00948	1.46
207574_s_at	GADD45B	0.706	8.62	7.9	0.000169	0.00948	1.47
209464_at	AURKB	-0.637	8.52	-7.88	0.000172	0.00954	1.45
206858_s_at	HOXC6	-1.07	8.22	-7.86	0.000174	0.00959	1.43
221260_s_at	CSRNP2	0.806	8.22	7.84	0.000177	0.00967	1.42
218875_s_at	FBXO5	-0.876	7.63	-7.83	0.000179	0.00969	1.41
201478_s_at	DKC1	-0.751	10	-7.81	0.00018	0.00975	1.4
218349_s_at	ZWILCH	-0.843	8.46	-7.8	0.000182	0.00979	1.39
214670_at	ZKSCAN1	0.734	9.57	7.79	0.000184	0.00986	1.38
202806_at	DBN1	-0.964	8.29	-7.78	0.000186	0.00992	1.37
221959_at	FAM110B	-0.694	7.72	-7.77	0.000186	0.00992	1.36
216211_at	TASOR2	0.806	7.07	7.75	0.000189	0.01	1.35
218734_at	NAA40	-0.756	9.21	-7.75	0.000189	0.01	1.35
203836_s_at	MAP3K5	-0.646	7.49	-7.73	0.000192	0.01	1.33
204805_s_at	H1-10	-0.861	10.4	-7.73	0.000192	0.01	1.33
204092_s_at	AURKA	-0.717	9.24	-7.71	0.000195	0.0101	1.31
206103_at	RAC3	-0.616	7.55	-7.69	0.000198	0.0101	1.3
209776_s_at	SLC19A1	-1.15	6.99	-7.69	0.000198	0.0101	1.3
220212_s_at	THADA	-0.706	8.19	-7.68	0.000199	0.0101	1.29
221222_s_at	C1orf56	0.676	8.14	7.68	0.000199	0.0101	1.29
221485_at	B4GALT5	0.622	8.4	7.7	0.000197	0.0101	1.31
206928_at	ZNF124	0.764	7.61	7.62	0.000209	0.0104	1.24
208765_s_at	HNRNPR	-0.753	10.3	-7.62	0.000208	0.0104	1.25
209674_at	CRY1	0.725	7.47	7.62	0.000209	0.0104	1.25
213338_at	TMEM158	0.762	6.73	7.61	0.000211	0.0104	1.23
201663_s_at	SMC4	-0.732	9.82	-7.59	0.000213	0.0105	1.22
203976_s_at	CHAF1A	-0.642	8.01	-7.59	0.000214	0.0105	1.22
210028_s_at	ORC3	-0.673	7.54	-7.57	0.000217	0.0106	1.2
208758_at	ATIC	-0.644	11.3	-7.55	0.000219	0.0106	1.19
203405_at	PSMG1	-0.678	8.47	-7.54	0.000221	0.0107	1.18
200892_s_at	TRA2B	-0.752	10.2	-7.53	0.000223	0.0107	1.18
205060_at	PARG	0.622	8.21	7.52	0.000224	0.0107	1.17
208616_s_at	PTP4A2	-0.747	11.1	-7.52	0.000225	0.0107	1.16
203967_at	CDC6	-0.887	7.16	-7.47	0.000234	0.0109	1.12
204999_s_at	ATF5	0.676	8.26	7.48	0.000231	0.0109	1.14
205286_at	TFAP2C	0.638	11.1	7.47	0.000234	0.0109	1.13
208787_at	MRPL3	-0.728	10.7	-7.47	0.000233	0.0109	1.13
210312_s_at	IFT20	0.615	9.39	7.47	0.000234	0.0109	1.12
206533_at	CHRNA5	-0.724	7.35	-7.46	0.000236	0.0109	1.12
201301_s_at	ANXA4	0.896	9.71	7.46	0.000236	0.0109	1.11
211316_x_at	CFLAR	0.59	7.89	7.45	0.000238	0.0109	1.11
212966_at	HIC2	0.799	7.48	7.44	0.00024	0.011	1.1
203499_at	EPHA2	1.13	8.37	7.43	0.000241	0.011	1.09
200768_s_at	MAT2A	-0.683	10.3	-7.38	0.000251	0.0111	1.05
201579_at	FAT1	0.796	7.99	7.39	0.00025	0.0111	1.06
202693_s_at	STK17A	0.696	7.74	7.41	0.000245	0.0111	1.07
204284_at	PPP1R3C	-1.06	8.99	-7.41	0.000246	0.0111	1.07
204444_at	KIF11	-0.986	7.65	-7.4	0.000246	0.0111	1.07
213721_at	SOX2	-0.646	7.73	-7.4	0.000247	0.0111	1.07
219502_at	NEIL3	-0.659	7.1	-7.4	0.000246	0.0111	1.07
200753_x_at	SRSF2	-0.766	10	-7.37	0.000252	0.0111	1.05
205792_at	CCN5	1.08	10.7	7.37	0.000253	0.0111	1.04
202326_at	EHMT2	-0.619	8.35	-7.34	0.00026	0.0112	1.02
208553_at	H1-4	-0.656	6.95	-7.34	0.000258	0.0112	1.02
217974_at	TM7SF3	0.6	7.53	7.33	0.000262	0.0112	1.01
218350_s_at	GMNN	-0.666	8.91	-7.35	0.000257	0.0112	1.03
218974_at	SOBP	-0.66	6.93	-7.33	0.000261	0.0112	1.01
219734_at	SIDT1	-0.736	9.23	-7.35	0.000256	0.0112	1.03
221746_at	UBL4A	-0.62	9.18	-7.33	0.000261	0.0112	1.01
222075_s_at	OAZ3	0.681	7.41	7.34	0.000259	0.0112	1.02
202206_at	ARL4C	0.626	6.76	7.31	0.000264	0.0112	0.996
212799_at	STX6	0.642	9.66	7.31	0.000264	0.0112	0.998
219236_at	PAQR6	0.697	8.19	7.31	0.000265	0.0112	0.994
202484_s_at	MBD2	-0.63	8.53	-7.29	0.000269	0.0114	0.977
206499_s_at	RCC1	-0.678	9.59	-7.25	0.000277	0.0117	0.945
209699_x_at	AKR1C2	-0.817	10.1	-7.24	0.00028	0.0117	0.935
204484_at	PIK3C2B	-0.737	9.33	-7.23	0.000283	0.0118	0.925
202848_s_at	GRK6	-0.59	8.92	-7.2	0.000288	0.012	0.904
204857_at	MAD1L1	-0.608	7.58	-7.19	0.00029	0.012	0.898
203343_at	UGDH	-0.576	11.8	-7.18	0.000292	0.0121	0.89
213883_s_at	TM2D1	0.603	8.21	7.17	0.000295	0.0121	0.881
218564_at	RFWD3	-0.886	8.97	-7.17	0.000296	0.0121	0.877
213391_at	DPY19L4	-0.588	8.92	-7.16	0.000297	0.0121	0.873
207357_s_at	GALNT10	-0.688	8.44	-7.13	0.000305	0.0123	0.844
213038_at	RNF19B	0.846	8.01	7.13	0.000305	0.0123	0.845
221500_s_at	STX16	0.665	11.2	7.1	0.000313	0.0126	0.818
201867_s_at	TBL1X	-0.842	8.26	-7.09	0.000314	0.0126	0.813
221946_at	PIERCE1	-0.63	7.85	-7.08	0.000317	0.0126	0.805
91816_f_at	MEX3D	-0.737	9.33	-7.08	0.000317	0.0126	0.804
213195_at	LYRM9	0.74	7.75	7.07	0.00032	0.0127	0.796
219038_at	MORC4	1.21	7.73	7.07	0.000321	0.0127	0.793
201697_s_at	DNMT1	-0.602	9.7	-7.04	0.000329	0.0129	0.764
202251_at	PRPF3	-0.641	9.18	-7.03	0.00033	0.0129	0.761
204039_at	CEBPA	0.738	9.39	7.05	0.000327	0.0129	0.772
213005_s_at	KANK1	-0.568	7.21	-7.04	0.000328	0.0129	0.769
221045_s_at	PER3	-0.656	6.54	-7.04	0.000329	0.0129	0.764
212137_at	LARP1	-0.606	10.4	-7.03	0.000331	0.0129	0.758
209408_at	KIF2C	-0.825	8.88	-7	0.00034	0.013	0.732
208510_s_at	PPARG	-0.748	7.07	-6.99	0.000341	0.0131	0.726
205339_at	STIL	-0.828	7.02	-6.99	0.000343	0.0131	0.721
201690_s_at	TPD52	-0.604	10.1	-6.96	0.000351	0.0131	0.698
208900_s_at	TOP1	0.68	10.5	6.96	0.00035	0.0131	0.699
209681_at	SLC19A2	0.615	9.32	6.96	0.00035	0.0131	0.701
218196_at	OSTM1	0.812	8.1	6.98	0.000346	0.0131	0.713
218237_s_at	SLC38A1	-0.647	11.8	-6.97	0.000347	0.0131	0.71
218535_s_at	RIOK2	-0.705	8	-6.97	0.000348	0.0131	0.707
202183_s_at	KIF22	-0.599	9.27	-6.95	0.000353	0.0132	0.69
202911_at	MSH6	-0.694	9.61	-6.95	0.000354	0.0132	0.688
203145_at	SPAG5	-0.635	8.08	-6.93	0.000358	0.0132	0.677
204969_s_at	RDX	-0.728	8.48	-6.94	0.000356	0.0132	0.681
221436_s_at	CDCA3	-0.7	8.14	-6.94	0.000357	0.0132	0.678
200790_at	ODC1	0.625	11.1	6.93	0.00036	0.0132	0.669
221665_s_at	EPS8L1	-0.557	7.87	-6.92	0.000362	0.0132	0.664
203987_at	FZD6	0.69	10.1	6.91	0.000365	0.0133	0.656
204835_at	POLA1	-0.564	8.1	-6.9	0.000367	0.0133	0.65
202211_at	ARFGAP3	0.63	7.14	6.89	0.000371	0.0134	0.639
218816_at	LRRC1	-0.567	8.17	-6.89	0.00037	0.0134	0.641
204203_at	CEBPG	-0.69	7.68	-6.87	0.000377	0.0135	0.621
218500_at	THEM6	-0.615	10.2	-6.87	0.000377	0.0135	0.622
209099_x_at	JAG1	0.837	6.98	6.86	0.000381	0.0136	0.61
209119_x_at	NR2F2	-0.635	9.62	-6.85	0.000383	0.0136	0.605
211899_s_at	TRAF4	0.579	9.49	6.83	0.000388	0.0138	0.589
214710_s_at	CCNB1	-0.984	9.77	-6.83	0.00039	0.0138	0.585
202432_at	PPP3CB	0.678	9.5	6.81	0.000397	0.0139	0.567
203006_at	INPP5A	-0.579	9.16	-6.79	0.000402	0.0139	0.552
208156_x_at	EPPK1	0.915	9.4	6.79	0.000402	0.0139	0.552
201742_x_at	SRSF1	-0.686	11.2	-6.77	0.000411	0.014	0.531
209899_s_at	PUF60	-0.616	11.1	-6.78	0.000408	0.014	0.538
200897_s_at	PALLD	-0.602	8.81	-6.75	0.000415	0.0141	0.52
203542_s_at	KLF9	0.808	7.6	6.76	0.000413	0.0141	0.525
203782_s_at	POLRMT	-0.539	7.99	-6.76	0.000413	0.0141	0.524
209175_at	SEC23IP	-0.545	7.77	-6.75	0.000416	0.0141	0.518
214760_at	ZNF337	0.643	8.53	6.75	0.000416	0.0141	0.517
206205_at	MPHOSPH9	-0.94	6.96	-6.74	0.000421	0.0142	0.503
200687_s_at	SF3B3	-0.562	9.97	-6.72	0.000426	0.0143	0.491
204059_s_at	ME1	-0.653	9.09	-6.71	0.000431	0.0143	0.48
212445_s_at	NEDD4L	-0.677	7.39	-6.71	0.00043	0.0143	0.482
204977_at	DDX10	-0.544	7.76	-6.7	0.000433	0.0144	0.474
210278_s_at	AP4S1	0.71	6.88	6.7	0.000435	0.0144	0.47
209520_s_at	NCBP1	-0.543	8.43	-6.69	0.000437	0.0144	0.465
208822_s_at	DAP3	-0.603	9.63	-6.69	0.000439	0.0144	0.46
201129_at	SRSF7	-0.557	8.46	-6.68	0.000442	0.0145	0.451
218192_at	IP6K2	0.607	8.83	6.68	0.000443	0.0145	0.45
212761_at	TCF7L2	-0.689	7.91	-6.65	0.000451	0.0145	0.43
218536_at	MRS2	0.544	7.31	6.66	0.000448	0.0145	0.437
201367_s_at	ZFP36L2	-0.86	7.84	-6.65	0.000453	0.0145	0.427
210074_at	CTSV	0.628	8.48	6.65	0.000454	0.0146	0.423
212215_at	PREPL	0.558	8.76	6.63	0.000461	0.0146	0.409
218553_s_at	KCTD15	-0.646	7.94	-6.63	0.00046	0.0146	0.411
219494_at	RAD54B	-0.737	7.7	-6.64	0.000459	0.0146	0.413
204908_s_at	BCL3	-0.593	8.13	-6.62	0.000463	0.0146	0.402
201291_s_at	TOP2A	-0.59	9.95	-6.61	0.000468	0.0147	0.392
203287_at	LAD1	-0.736	9.1	-6.61	0.000469	0.0147	0.39
208875_s_at	PAK2	-0.694	10.1	-6.61	0.000467	0.0147	0.394
213115_at	ATG4A	0.577	8.11	6.62	0.000466	0.0147	0.395
222250_s_at	INTS7	-0.53	7.35	-6.59	0.000475	0.0148	0.376
202691_at	SNRPD1	-0.518	7.73	-6.58	0.000481	0.0149	0.362
204151_x_at	AKR1C1	-0.807	10.3	-6.58	0.000481	0.0149	0.361
205160_at	PEX11A	0.78	8.08	6.58	0.00048	0.0149	0.364
218014_at	NUP85	-0.57	9.58	-6.58	0.000481	0.0149	0.362
218027_at	MRPL15	-0.685	9.44	-6.56	0.000488	0.0151	0.347
220052_s_at	TINF2	0.544	9.02	6.56	0.00049	0.0151	0.343
204285_s_at	PMAIP1	1.28	8.19	6.55	0.000495	0.0152	0.332
207069_s_at	SMAD6	-0.579	7.26	-6.54	0.000497	0.0152	0.327
37590_g_at	ZNF710-AS1	0.535	7.57	6.54	0.000498	0.0152	0.325
202722_s_at	GFPT1	-0.605	8.52	-6.53	0.000504	0.0153	0.313
219922_s_at	LTBP3	-0.563	9.04	-6.52	0.000506	0.0154	0.309
205356_at	USP13	-0.637	8.82	-6.51	0.000512	0.0155	0.296
204752_x_at	PARP2	-0.681	9.35	-6.5	0.000516	0.0155	0.288
208922_s_at	NXF1	0.93	10.1	6.5	0.000515	0.0155	0.289
221755_at	EHBP1L1	-0.554	7.32	-6.5	0.000515	0.0155	0.291
206929_s_at	NFIC	-0.606	8.36	-6.48	0.000525	0.0157	0.27
200037_s_at	CBX3	-0.721	11.4	-6.47	0.000528	0.0157	0.264
203565_s_at	MNAT1	-0.625	8.47	-6.46	0.000531	0.0157	0.258
205858_at	NGFR	0.744	6.57	6.47	0.000529	0.0157	0.26
217906_at	KLHDC2	0.627	10.7	6.47	0.00053	0.0157	0.259
202094_at	BIRC5	-0.603	8.38	-6.45	0.000539	0.0159	0.241
202669_s_at	EFNB2	-0.641	8.87	-6.44	0.000542	0.0159	0.235
214794_at	PA2G4	0.6	8.97	6.44	0.000541	0.0159	0.238
202431_s_at	MYC	-0.659	9.24	-6.43	0.000545	0.0159	0.229
204612_at	PKIA	-0.806	8.3	-6.44	0.000544	0.0159	0.232
205543_at	HSPA4L	1.21	7.55	6.43	0.000545	0.0159	0.228
210947_s_at	MSH3	-0.56	7.43	-6.43	0.000546	0.0159	0.226
212334_at	GNS	0.636	10.2	6.42	0.000553	0.0161	0.214
218205_s_at	MKNK2	0.558	9.5	6.42	0.000552	0.0161	0.215
203284_s_at	HS2ST1	-0.601	7.82	-6.41	0.000556	0.0161	0.209
208165_s_at	PRSS16	-0.819	6.51	-6.41	0.000555	0.0161	0.209
204651_at	NRF1	-0.681	6.49	-6.41	0.000558	0.0161	0.203
205187_at	SMAD5	0.567	7.38	6.4	0.000561	0.0162	0.198
208956_x_at	DUT	-0.65	10.5	-6.4	0.000562	0.0162	0.197
206723_s_at	LPAR2	-0.563	8.8	-6.38	0.000571	0.0163	0.179
206566_at	SLC7A1	-0.807	7.63	-6.37	0.000575	0.0164	0.172
212745_s_at	BBS4	0.546	7.21	6.36	0.000579	0.0165	0.165
203303_at	DYNLT3	0.594	10.2	6.36	0.000581	0.0165	0.161
221521_s_at	GINS2	-0.796	10.4	-6.36	0.000583	0.0165	0.158
204126_s_at	CDC45	-0.708	8.71	-6.34	0.000594	0.0166	0.138
204975_at	EMP2	-0.605	11	-6.33	0.000594	0.0166	0.137
205024_s_at	RAD51	-0.596	8.45	-6.34	0.000592	0.0166	0.14
218288_s_at	CCDC90B	0.555	10.2	6.34	0.000591	0.0166	0.143
201041_s_at	DUSP1	0.648	8.63	6.32	0.000604	0.0169	0.119
200749_at	RAN	-0.552	8.79	-6.31	0.000606	0.0169	0.116
208991_at	STAT3	0.699	9.72	6.3	0.00061	0.0169	0.109
214138_at	ZNF79	0.822	7.1	6.31	0.000609	0.0169	0.111
218403_at	TRIAP1	0.804	10.4	6.3	0.00061	0.0169	0.108
205282_at	LRP8	-0.954	6.47	-6.29	0.000618	0.0171	0.0953
205009_at	TFF1	0.723	13.5	6.27	0.000629	0.0172	0.0761
205292_s_at	HNRNPA2B1	-0.661	11.5	-6.27	0.00063	0.0172	0.075
215084_s_at	LRRC42	-0.513	7.39	-6.27	0.000629	0.0172	0.0765
218112_at	MRPS34	-0.56	9.8	-6.27	0.000629	0.0172	0.0763
218399_s_at	CDCA4	-0.528	9.79	-6.26	0.000634	0.0172	0.0686
208659_at	CLIC1	-0.529	11.4	-6.25	0.000638	0.0173	0.0605
207688_s_at	INHBC	-0.635	8.92	-6.25	0.000642	0.0174	0.0538
208103_s_at	ANP32E	-1.05	7.71	-6.24	0.000648	0.0175	0.0444
212093_s_at	MTUS1	-0.653	7.98	-6.23	0.000651	0.0175	0.039
220225_at	IRX4	-0.916	7.36	-6.23	0.000651	0.0175	0.0398
205253_at	PBX1	-0.563	7.7	-6.22	0.000659	0.0176	0.0259
209006_s_at	RSRP1	0.711	8.67	6.22	0.000659	0.0176	0.0268
201385_at	DHX15	-0.618	10.9	-6.2	0.000667	0.0177	0.013
212462_at	KAT6B	-0.567	8.8	-6.2	0.000667	0.0177	0.0132
213923_at	RAP2B	0.623	10.4	6.2	0.000667	0.0177	0.0143
219050_s_at	ZNHIT2	-0.505	7.68	-6.21	0.000666	0.0177	0.0156
221582_at	H2AC25	0.779	10.7	6.19	0.000672	0.0177	0.00503
212973_at	RPIA	0.52	8.89	6.18	0.000679	0.0178	-0.00562
205596_s_at	SMURF2	0.555	9.54	6.17	0.000685	0.0179	-0.014
201020_at	YWHAH	-0.636	9.95	-6.17	0.000689	0.0179	-0.0203
214030_at	CRYBG3	-0.511	7.37	-6.17	0.000689	0.0179	-0.0207
212160_at	XPOT	-0.523	10.1	-6.16	0.000693	0.018	-0.0268
209917_s_at	TP53TG1	0.651	9.07	6.15	0.0007	0.0181	-0.0381
209832_s_at	CDT1	-0.594	8.57	-6.14	0.000707	0.0181	-0.0488
217610_at	SPDYE2	0.606	8.33	6.14	0.000708	0.0181	-0.0495
219152_at	PODXL2	-0.53	7	-6.14	0.000709	0.0181	-0.0517
222152_at	PDCD6	0.515	7.75	6.14	0.000707	0.0181	-0.0491
214755_at	UAP1L1	-0.749	7.98	-6.13	0.00071	0.0181	-0.0536
205034_at	CCNE2	-0.802	8.92	-6.13	0.000712	0.0181	-0.0567
205319_at	PSCA	-0.821	7.13	-6.12	0.000717	0.0182	-0.0628
208313_s_at	SF1	-0.544	10.5	-6.12	0.000716	0.0182	-0.0627
217946_s_at	SAE1	-0.566	10.5	-6.12	0.000719	0.0182	-0.067
219037_at	RRP15	-0.903	7.74	-6.12	0.000721	0.0182	-0.0692
218627_at	DRAM1	0.843	9	6.11	0.000729	0.0184	-0.0809
212463_at	CD59	0.527	8.62	6.09	0.00074	0.0186	-0.0967
213427_at	RPP40	-0.786	8.59	-6.07	0.000749	0.0187	-0.11
209191_at	TUBB6	0.895	9.56	6.07	0.000752	0.0188	-0.115
209201_x_at	CXCR4	0.596	7.97	6.06	0.000758	0.0188	-0.124
211763_s_at	UBE2B	-0.674	8.3	-6.06	0.000757	0.0188	-0.122
214404_x_at	SPDEF	-0.714	9.25	-6.06	0.000759	0.0188	-0.124
219860_at	LY6G5C	-0.509	6.74	-6.06	0.000757	0.0188	-0.121
205093_at	PLEKHA6	-0.512	7.73	-6.02	0.000784	0.0192	-0.159
218176_at	MAGEF1	-0.574	9.16	-6.02	0.000786	0.0192	-0.162
219932_at	SLC27A6	-0.637	7.84	-6.02	0.000786	0.0192	-0.162
201300_s_at	PRNP	0.92	8.06	6.01	0.000794	0.0193	-0.173
202725_at	POLR2A	0.548	9.45	6.01	0.000793	0.0193	-0.171
206043_s_at	ATP2C2	-0.504	8.16	-6.01	0.000792	0.0193	-0.169
208793_x_at	SMARCA4	-0.503	9.6	-6	0.000803	0.0193	-0.184
219020_at	HS1BP3	0.55	9.05	6	0.000801	0.0193	-0.183
204990_s_at	ITGB4	-0.537	10.6	-5.99	0.000806	0.0194	-0.189
209998_at	PIGO	-0.616	8.43	-5.98	0.000814	0.0195	-0.2
219077_s_at	WWOX	-0.964	8.95	-5.98	0.000818	0.0195	-0.204
210362_x_at	PML	0.613	6.83	5.97	0.00082	0.0195	-0.208
203213_at	CDK1	-0.546	9.41	-5.97	0.000823	0.0195	-0.211
202659_at	PSMB10	0.517	7.87	5.97	0.000826	0.0196	-0.215
213677_s_at	PMS1	-0.724	7.44	-5.97	0.000826	0.0196	-0.216
219154_at	TMEM120B	0.533	7.61	5.96	0.000828	0.0196	-0.218
202181_at	SUSD6	0.583	9.07	5.96	0.000833	0.0196	-0.223
214474_at	PRKAB2	0.61	7.7	5.96	0.000833	0.0196	-0.224
204817_at	ESPL1	-0.585	9.18	-5.95	0.000835	0.0196	-0.227
216867_s_at	PDGFA	0.641	8.12	5.95	0.000842	0.0197	-0.235
221962_s_at	UBE2H	0.501	9.3	5.94	0.000844	0.0197	-0.238
201972_at	ATP6V1A	0.587	10.7	5.93	0.000858	0.0199	-0.255
212436_at	TRIM33	-0.502	9.74	-5.93	0.000856	0.0199	-0.253
219787_s_at	ECT2	-0.626	8.47	-5.93	0.000857	0.0199	-0.255
218471_s_at	BBS1	0.594	8.04	5.92	0.000862	0.02	-0.261
203035_s_at	PIAS3	-0.522	9.04	-5.9	0.000879	0.0203	-0.282
201773_at	ADNP	-0.639	10.3	-5.89	0.000886	0.0204	-0.29
208926_at	NEU1	0.735	9.79	5.88	0.000894	0.0204	-0.3
209529_at	PLPP2	-0.524	8.53	-5.88	0.000891	0.0204	-0.296
214658_at	TMED7	0.513	7.44	5.88	0.000891	0.0204	-0.297
221311_x_at	LYRM2	-0.533	8.55	-5.89	0.00089	0.0204	-0.295
202450_s_at	CTSK	0.561	8.06	5.87	0.0009	0.0205	-0.307
218308_at	TACC3	-0.62	8.57	-5.87	0.000902	0.0205	-0.309
203973_s_at	CEBPD	0.551	8.62	5.86	0.000909	0.0206	-0.318
210117_at	SPAG1	0.704	7.38	5.87	0.000907	0.0206	-0.316
218080_x_at	FAF1	-0.56	8.84	-5.85	0.000917	0.0206	-0.328
200993_at	IPO7	0.568	9.45	5.85	0.000924	0.0207	-0.335
214500_at	MACROH2A1	0.608	7.77	5.84	0.000926	0.0207	-0.338
222208_s_at	POLR2J4	0.585	6.89	5.84	0.000927	0.0207	-0.338
213632_at	DHODH	-0.518	6.54	-5.84	0.000931	0.0207	-0.343
203978_at	NUBP1	-0.505	8.61	-5.83	0.00094	0.0208	-0.354
222216_s_at	MRPL17	-0.519	8.81	-5.83	0.00094	0.0208	-0.354
209526_s_at	HDGFL3	-0.697	10.3	-5.81	0.000959	0.0211	-0.375
203344_s_at	RBBP8	-0.508	8.75	-5.79	0.00097	0.0213	-0.387
207124_s_at	GNB5	-0.532	8.44	-5.79	0.000973	0.0213	-0.391
210827_s_at	ELF3	0.54	9.23	5.79	0.000972	0.0213	-0.389
212512_s_at	CARM1	-0.682	8.26	-5.79	0.000974	0.0213	-0.391
201054_at	HNRNPA0	-0.595	9.66	-5.77	0.000994	0.0215	-0.414
204633_s_at	RPS6KA5	0.533	8.14	5.77	0.000989	0.0215	-0.408
209692_at	EYA2	-0.532	6.95	-5.77	0.000989	0.0215	-0.408
209711_at	SLC35D1	0.522	8.05	5.77	0.000993	0.0215	-0.413
218941_at	FBXW2	-0.529	8.41	-5.77	0.000994	0.0215	-0.413
209667_at	CES2	0.664	7.91	5.77	0.000996	0.0215	-0.416
202794_at	INPP1	1.12	7.45	5.76	0.000999	0.0215	-0.419
212846_at	RRP1B	-0.598	8.65	-5.76	0.001	0.0215	-0.423
212030_at	RBM25	-0.535	8.34	-5.75	0.00101	0.0216	-0.434
205110_s_at	FGF13	-1.14	7.91	-5.75	0.00102	0.0217	-0.436
221050_s_at	GTPBP2	-0.746	8.06	-5.74	0.00102	0.0217	-0.439
204417_at	GALC	0.775	9.28	5.74	0.00102	0.0217	-0.441
209617_s_at	CTNND2	-1.07	7.87	-5.74	0.00102	0.0217	-0.444
45653_at	KCTD13	0.535	9.04	5.73	0.00103	0.0217	-0.453
202905_x_at	NBN	-0.753	10.1	-5.73	0.00103	0.0217	-0.457
203806_s_at	FANCA	-0.506	8.22	-5.73	0.00103	0.0217	-0.456
202589_at	TYMS	0.522	11.8	5.72	0.00104	0.0218	-0.464
203201_at	PMM2	-0.719	8.44	-5.72	0.00104	0.0218	-0.461
210389_x_at	TUBD1	-0.586	10.3	-5.72	0.00104	0.0218	-0.466
208812_x_at	HLA-C	0.739	11.3	5.7	0.00106	0.022	-0.483
212020_s_at	MKI67	-0.592	9.08	-5.7	0.00106	0.022	-0.486
205769_at	SLC27A2	-0.529	7.48	-5.69	0.00107	0.022	-0.488
220911_s_at	NYNRIN	0.516	7.1	5.69	0.00107	0.022	-0.492
222118_at	CENPN	-0.899	8.48	-5.68	0.00108	0.0221	-0.503
201202_at	PCNA	0.656	10.9	5.66	0.0011	0.0222	-0.522
201361_at	TMEM109	-0.676	9.93	-5.66	0.0011	0.0222	-0.522
213912_at	TBC1D30	-0.708	6.97	-5.66	0.0011	0.0222	-0.521
215285_s_at	PHTF1	-0.538	7.25	-5.67	0.00109	0.0222	-0.513
219306_at	KIF15	-0.727	6.85	-5.66	0.0011	0.0222	-0.523
222209_s_at	TMEM135	-0.938	7.56	-5.67	0.00109	0.0222	-0.516
201718_s_at	EPB41L2	-0.564	7.86	-5.65	0.00111	0.0222	-0.529
204420_at	FOSL1	1.26	6.88	5.65	0.00111	0.0223	-0.533
204224_s_at	GCH1	0.884	9.26	5.64	0.00112	0.0223	-0.538
212722_s_at	JMJD6	-0.548	6.91	-5.64	0.00112	0.0224	-0.544
219010_at	INAVA	-0.827	8.21	-5.63	0.00113	0.0225	-0.55
201313_at	ENO2	-0.522	8.03	-5.63	0.00114	0.0225	-0.557
218157_x_at	CDC42SE1	0.585	11.3	5.63	0.00114	0.0225	-0.556
203906_at	IQSEC1	-0.574	8.13	-5.62	0.00114	0.0226	-0.56
201443_s_at	ATP6AP2	0.562	10.8	5.62	0.00115	0.0227	-0.566
201755_at	MCM5	-0.769	8.77	-5.61	0.00115	0.0228	-0.573
203123_s_at	SLC11A2	0.598	8.99	5.61	0.00115	0.0228	-0.575
219553_at	NME7	-0.613	7.29	-5.6	0.00117	0.0229	-0.589
218726_at	HJURP	-0.746	8.83	-5.59	0.00118	0.023	-0.597
205440_s_at	NPY1R	1.6	9.81	5.58	0.00118	0.0231	-0.601
202193_at	LIMK2	0.855	7.87	5.58	0.00119	0.0231	-0.607
203270_at	DTYMK	-0.616	8.76	-5.58	0.00119	0.0231	-0.609
209590_at	BMP7	-0.535	9.74	-5.58	0.00119	0.0231	-0.606
217914_at	TPCN1	0.503	8.87	5.57	0.00119	0.0231	-0.611
202650_s_at	TMEM94	0.54	8.78	5.57	0.0012	0.0232	-0.616
213844_at	HOXA5	0.574	7.86	5.56	0.00121	0.0232	-0.622
219680_at	NLRX1	0.502	8.01	5.56	0.00121	0.0232	-0.624
219720_s_at	GPATCH2L	0.649	7.53	5.56	0.00121	0.0232	-0.624
202219_at	SLC6A8	1.28	9.34	5.54	0.00123	0.0235	-0.644
205031_at	EFNB3	-0.765	7.69	-5.54	0.00124	0.0236	-0.65
209026_x_at	TUBB	-0.627	12.6	-5.54	0.00124	0.0236	-0.649
207590_s_at	CENPI	-0.759	7.3	-5.54	0.00124	0.0236	-0.652
203588_s_at	TFDP2	-0.595	8.13	-5.53	0.00124	0.0236	-0.654
221006_s_at	SNX27	0.502	9.02	5.53	0.00124	0.0236	-0.655
212563_at	BOP1	-0.898	7.7	-5.53	0.00125	0.0237	-0.662
221577_x_at	GDF15	1.67	9.95	5.51	0.00127	0.0239	-0.677
209345_s_at	PI4K2A	0.632	9.03	5.5	0.00129	0.0241	-0.69
218384_at	CARHSP1	-0.516	10.2	-5.5	0.00129	0.0241	-0.691
204478_s_at	RABIF	-0.525	9.73	-5.49	0.00129	0.0241	-0.697
205500_at	C5	-0.566	7.03	-5.48	0.00131	0.0243	-0.708
210774_s_at	NCOA4	0.519	11.1	5.47	0.00132	0.0245	-0.717
215891_s_at	GM2A	0.567	6.88	5.46	0.00133	0.0246	-0.726
204250_s_at	CEP164	0.525	6.89	5.45	0.00135	0.0248	-0.739
212660_at	JADE2	-0.588	8.9	-5.44	0.00136	0.025	-0.75
221865_at	TMEM268	-0.594	7.05	-5.44	0.00136	0.025	-0.751
202425_x_at	PPP3CA	-0.561	10.4	-5.43	0.00138	0.025	-0.766
203432_at	TMPO	-0.576	9.51	-5.43	0.00138	0.025	-0.764
204299_at	SRSF10	-1.03	6.89	-5.43	0.00138	0.025	-0.762
205240_at	GPSM2	-0.579	8.73	-5.43	0.00138	0.025	-0.764
210791_s_at	ARHGAP32	-0.636	7.22	-5.43	0.00137	0.025	-0.758
200965_s_at	ABLIM1	-0.755	7.51	-5.42	0.00139	0.0251	-0.777
203855_at	WDR47	0.536	7.98	5.41	0.0014	0.0251	-0.779
218866_s_at	POLR3K	-0.756	10.1	-5.41	0.0014	0.0251	-0.778
222240_s_at	ISYNA1	0.701	8.9	5.4	0.00142	0.0253	-0.794
204941_s_at	ALDH3B2	-0.574	7.32	-5.38	0.00144	0.0254	-0.811
209260_at	SFN	0.904	10.9	5.38	0.00144	0.0254	-0.81
218853_s_at	MOSPD1	0.664	8.83	5.38	0.00144	0.0254	-0.81
201739_at	SGK1	0.545	8.11	5.36	0.00147	0.0256	-0.832
209151_x_at	TCF3	-0.631	7.39	-5.37	0.00146	0.0256	-0.825
209631_s_at	GPR37	-1.07	6.48	-5.37	0.00146	0.0256	-0.827
210001_s_at	SOCS1	0.688	7.16	5.37	0.00147	0.0256	-0.831
212858_at	PAQR4	-0.515	8.88	-5.37	0.00145	0.0256	-0.821
34726_at	CACNB3	-0.589	8.26	-5.37	0.00147	0.0256	-0.831
204240_s_at	SMC2	-0.579	8.37	-5.35	0.00148	0.0257	-0.845
205613_at	SYT17	0.5	6.74	5.34	0.0015	0.0258	-0.853
218886_at	PAK1IP1	-0.692	6.89	-5.34	0.0015	0.0258	-0.856
217783_s_at	YPEL5	0.903	9.63	5.34	0.0015	0.0258	-0.859
221685_s_at	SPDL1	-0.503	7.57	-5.33	0.00152	0.0259	-0.868
221601_s_at	FCMR	0.57	7.34	5.33	0.00152	0.0259	-0.871
209160_at	AKR1C3	-1.31	8.64	-5.32	0.00153	0.0259	-0.874
210220_at	FZD2	-1.05	7.12	-5.32	0.00154	0.0261	-0.883
212835_at	ABRAXAS2	0.506	7.61	5.31	0.00154	0.0261	-0.887
35148_at	TJP3	-0.509	7.37	-5.3	0.00156	0.0264	-0.901
205594_at	ZNF652	-0.524	7.9	-5.29	0.00157	0.0265	-0.908
219335_at	ARMCX5	-0.515	6.62	-5.27	0.00161	0.027	-0.931
209482_at	POP7	-0.554	9.55	-5.27	0.00161	0.027	-0.934
202253_s_at	DNM2	-0.501	8.77	-5.24	0.00166	0.0274	-0.963
201195_s_at	SLC7A5	1.63	10.6	5.24	0.00167	0.0274	-0.969
202633_at	TOPBP1	-0.542	8.69	-5.24	0.00166	0.0274	-0.966
206414_s_at	ASAP2	-0.62	8.5	-5.24	0.00166	0.0274	-0.968
209155_s_at	NT5C2	-0.645	10.3	-5.24	0.00167	0.0274	-0.969
203594_at	RTCA	-0.647	7.36	-5.23	0.00167	0.0275	-0.973
210111_s_at	KLHDC10	0.61	8.76	5.22	0.00169	0.0276	-0.982
204516_at	ATXN7	0.537	8.09	5.22	0.00169	0.0276	-0.987
201937_s_at	DNPEP	-0.513	9.33	-5.21	0.00172	0.0279	-1
212511_at	PICALM	-0.586	6.74	-5.21	0.00172	0.0279	-1
212240_s_at	PIK3R1	-0.667	10.4	-5.19	0.00175	0.0281	-1.02
200603_at	PRKAR1A	0.505	11.6	5.19	0.00175	0.0282	-1.02
218788_s_at	SMYD3	-0.593	8.41	-5.16	0.00179	0.0287	-1.05
206066_s_at	RAD51C	0.588	11	5.16	0.00179	0.0287	-1.05
213308_at	SHANK2	-0.761	7.62	-5.14	0.00183	0.0289	-1.07
203394_s_at	HES1	0.551	8.96	5.13	0.00185	0.0291	-1.08
207233_s_at	MITF	0.517	7.13	5.13	0.00186	0.0291	-1.08
203490_at	ELF4	-0.528	9.34	-5.13	0.00186	0.0292	-1.09
204379_s_at	FGFR3	0.631	8.31	5.12	0.00187	0.0292	-1.09
202875_s_at	PBX2	-0.6	7.7	-5.12	0.00188	0.0294	-1.1
202246_s_at	CDK4	-0.583	11.3	-5.11	0.00189	0.0295	-1.11
206452_x_at	PTPA	-0.514	9.68	-5.11	0.0019	0.0295	-1.11
213242_x_at	CEP170B	0.737	10.4	5.11	0.0019	0.0295	-1.11
221652_s_at	INTS13	-0.685	8.65	-5.09	0.00193	0.0298	-1.13
201578_at	PODXL	0.534	9	5.09	0.00193	0.0298	-1.13
214657_s_at	NEAT1	0.653	8.63	5.09	0.00193	0.0298	-1.13
218585_s_at	DTL	-0.611	7.39	-5.07	0.00198	0.0303	-1.16
201801_s_at	SLC29A1	-0.78	8.42	-5.06	0.002	0.0303	-1.16
209527_at	EXOSC2	-0.741	8.49	-5.04	0.00202	0.0305	-1.18
208070_s_at	REV3L	0.575	9.01	5.04	0.00203	0.0305	-1.18
218424_s_at	STEAP3	0.652	8.37	5.03	0.00207	0.0309	-1.2
220488_s_at	BCAS3	-0.509	12.9	-5.02	0.00208	0.0309	-1.21
218885_s_at	GALNT12	-0.635	6.79	-5.01	0.00209	0.031	-1.21
222028_at	ZNF45	-0.608	6.66	-5	0.00212	0.0313	-1.23
201951_at	ALCAM	-0.725	9.97	-4.98	0.00216	0.0317	-1.25
211727_s_at	COX11	0.542	9.72	4.98	0.00217	0.0317	-1.25
221058_s_at	CKLF	-0.626	7.21	-4.98	0.00217	0.0317	-1.25
205376_at	INPP4B	-0.694	8.37	-4.98	0.00218	0.0317	-1.26
205022_s_at	FOXN3	-0.651	7.34	-4.97	0.00219	0.0319	-1.26
208829_at	TAPBP	0.503	10.2	4.97	0.00219	0.0319	-1.26
211116_at	SLC9A2	-0.523	7.41	-4.97	0.0022	0.0319	-1.27
201631_s_at	IER3	0.583	10.4	4.96	0.00222	0.032	-1.28
202599_s_at	NRIP1	-0.582	10.1	-4.95	0.00223	0.032	-1.28
202111_at	SLC4A2	-0.521	9.39	-4.95	0.00223	0.0321	-1.28
219560_at	RTL10	0.534	8.26	4.95	0.00224	0.0321	-1.29
201702_s_at	PPP1R10	-0.736	8.41	-4.93	0.00227	0.0324	-1.3
204082_at	PBX3	-0.793	9.61	-4.93	0.00228	0.0324	-1.31
204510_at	CDC7	-0.595	7.13	-4.93	0.00228	0.0324	-1.31
218631_at	AVPI1	0.613	9.39	4.93	0.00228	0.0324	-1.31
203503_s_at	PEX14	-0.592	7.08	-4.93	0.00229	0.0325	-1.31
200617_at	MLEC	0.565	10.5	4.92	0.0023	0.0325	-1.32
213122_at	TSPYL5	-0.557	9.93	-4.92	0.00231	0.0326	-1.32
213874_at	SERPINA4	0.5	6.88	4.92	0.00232	0.0326	-1.32
222164_at	FGFR1	0.517	6.64	4.91	0.00232	0.0326	-1.33
204384_at	GOLGA2	-0.678	8.26	-4.91	0.00234	0.0326	-1.33
213562_s_at	SQLE	-0.539	8.92	-4.91	0.00234	0.0326	-1.33
219529_at	CLIC3	-0.502	10.6	-4.9	0.00236	0.0328	-1.34
212460_at	SPTSSA	0.686	10.3	4.9	0.00236	0.0328	-1.34
202531_at	IRF1	0.662	8.13	4.89	0.00238	0.0329	-1.35
206689_x_at	KAT5	-0.609	8.77	-4.89	0.00237	0.0329	-1.35
209306_s_at	SWAP70	0.577	6.67	4.89	0.00239	0.0329	-1.36
202293_at	STAG1	-0.681	7.97	-4.88	0.00239	0.033	-1.36
209184_s_at	IRS2	0.691	8.57	4.88	0.00241	0.0331	-1.37
202580_x_at	FOXM1	-0.549	9.18	-4.87	0.00242	0.0331	-1.37
205135_s_at	NUFIP1	-0.577	6.69	-4.86	0.00245	0.0335	-1.38
218558_s_at	MRPL39	0.589	9.2	4.85	0.00247	0.0336	-1.39
203038_at	PTPRK	-0.546	10.4	-4.85	0.00249	0.0336	-1.4
212720_at	PAPOLA	0.59	8.58	4.84	0.0025	0.0336	-1.4
217644_s_at	SOS2	0.568	6.93	4.84	0.0025	0.0336	-1.41
218756_s_at	DHRS11	0.7	6.62	4.84	0.0025	0.0336	-1.41
204264_at	CPT2	0.654	6.61	4.81	0.00258	0.0343	-1.44
207549_x_at	CD46	0.533	9.52	4.81	0.00259	0.0344	-1.45
212079_s_at	KMT2A	0.524	8.29	4.8	0.00261	0.0344	-1.45
218435_at	DNAJC15	-0.718	10.4	-4.8	0.0026	0.0344	-1.45
221887_s_at	WHRN	0.597	8.51	4.8	0.00261	0.0344	-1.45
221566_s_at	NOL3	-0.569	7.26	-4.8	0.00262	0.0345	-1.46
221280_s_at	PARD3	-0.527	6.44	-4.8	0.00263	0.0345	-1.46
204061_at	PRKX	0.615	7.09	4.79	0.00265	0.0347	-1.47
213918_s_at	NIPBL	-0.553	8.08	-4.79	0.00265	0.0347	-1.47
201565_s_at	ID2	0.626	11	4.76	0.00273	0.0351	-1.5
203221_at	TLE1	-0.927	10.1	-4.77	0.00271	0.0351	-1.49
208753_s_at	NAP1L1	0.513	9.37	4.75	0.00275	0.0351	-1.51
214079_at	DHRS2	0.542	8.02	4.76	0.00274	0.0351	-1.51
202606_s_at	TLK1	-0.655	8.04	-4.75	0.00277	0.0353	-1.52
212730_at	SYNM	0.849	7.61	4.74	0.00278	0.0353	-1.52
214696_at	MIR22HG	0.651	7.77	4.74	0.00278	0.0353	-1.52
209488_s_at	RBPMS	-0.533	9.15	-4.72	0.00284	0.0359	-1.54
204127_at	RFC3	-0.615	9.91	-4.72	0.00285	0.0359	-1.55
202262_x_at	DDAH2	-0.562	9.39	-4.72	0.00286	0.036	-1.55
215313_x_at	HLA-A	0.533	10.7	4.71	0.0029	0.0363	-1.56
205492_s_at	DPYSL4	0.913	7.47	4.7	0.00291	0.0364	-1.57
200621_at	CSRP1	-0.765	11	-4.69	0.00295	0.0366	-1.58
209610_s_at	SLC1A4	-0.511	6.5	-4.69	0.00296	0.0367	-1.59
206385_s_at	ANK3	-0.945	8.66	-4.68	0.00297	0.0368	-1.59
201286_at	SDC1	0.562	9.46	4.67	0.00301	0.0371	-1.61
212037_at	PNN	-0.571	8.72	-4.67	0.00301	0.0371	-1.61
215501_s_at	DUSP10	0.539	6.8	4.66	0.00304	0.0372	-1.62
218729_at	LXN	-1.24	10.3	-4.66	0.00303	0.0372	-1.61
201182_s_at	CHD4	-0.51	9.25	-4.66	0.00304	0.0372	-1.62
201834_at	PRKAB1	0.686	8.75	4.64	0.0031	0.0374	-1.64
201995_at	EXT1	-0.56	7.25	-4.63	0.00314	0.0377	-1.65
208978_at	CRIP2	-0.588	10	-4.62	0.00316	0.0377	-1.66
218309_at	CAMK2N1	-0.641	9.96	-4.62	0.00317	0.0378	-1.66
202741_at	PRKACB	-0.582	7.89	-4.61	0.00322	0.0381	-1.68
203372_s_at	SOCS2	-0.897	7.41	-4.61	0.00322	0.0381	-1.68
218368_s_at	TNFRSF12A	-0.53	10.5	-4.6	0.00325	0.0383	-1.69
203690_at	TUBGCP3	-0.528	6.65	-4.6	0.00326	0.0384	-1.69
202345_s_at	FABP5	-0.545	7.82	-4.56	0.00338	0.0393	-1.73
201584_s_at	DDX39A	-0.699	10.5	-4.56	0.00339	0.0393	-1.74
204634_at	NEK4	-0.525	6.52	-4.55	0.00342	0.0393	-1.74
208729_x_at	HLA-B	0.592	9.54	4.56	0.00341	0.0393	-1.74
202177_at	GAS6	0.521	6.59	4.55	0.00345	0.0395	-1.75
203192_at	ABCB6	0.818	8.65	4.53	0.00349	0.0397	-1.77
204623_at	TFF3	0.623	8.91	4.53	0.00351	0.0397	-1.77
204970_s_at	MAFG	0.544	8.13	4.52	0.00353	0.0398	-1.78
213076_at	ITPKC	0.506	8	4.52	0.00354	0.0398	-1.78
202945_at	FPGS	-0.515	9.17	-4.52	0.00356	0.0399	-1.79
218129_s_at	NFYB	0.635	7.72	4.52	0.00356	0.0399	-1.79
203340_s_at	SLC25A12	-0.69	7.22	-4.51	0.00357	0.0399	-1.79
208939_at	SEPHS1	-0.57	9	-4.5	0.00361	0.0402	-1.8
218404_at	SNX10	-0.579	7.26	-4.5	0.00363	0.0403	-1.81
204976_s_at	AMMECR1	0.697	8.91	4.49	0.00366	0.0404	-1.82
202587_s_at	AK1	0.868	8.83	4.48	0.00369	0.0406	-1.83
207060_at	EN2	0.767	6.73	4.48	0.0037	0.0408	-1.83
202271_at	FBXO28	0.524	7.86	4.46	0.00378	0.0411	-1.85
204105_s_at	NRCAM	-0.97	9.79	-4.45	0.00381	0.0412	-1.86
213149_at	DLAT	-0.507	6.65	-4.46	0.0038	0.0412	-1.86
218180_s_at	EPS8L2	0.607	9.14	4.46	0.0038	0.0412	-1.86
218297_at	MINDY3	0.567	7.21	4.46	0.00381	0.0412	-1.86
219978_s_at	NUSAP1	-0.603	9.78	-4.45	0.00385	0.0414	-1.87
210372_s_at	TPD52L1	-0.575	10.4	-4.43	0.00393	0.0419	-1.89
201927_s_at	PKP4	-0.686	8.56	-4.42	0.00396	0.042	-1.9
208012_x_at	SP110	-0.561	8.15	-4.42	0.00396	0.042	-1.9
204531_s_at	BRCA1	-0.671	7.2	-4.41	0.00399	0.0423	-1.91
204944_at	PTPRG	-0.815	7.24	-4.41	0.00402	0.0425	-1.92
56256_at	SIDT2	0.526	8.39	4.41	0.00403	0.0425	-1.92
201362_at	IVNS1ABP	-0.609	8.13	-4.4	0.00403	0.0425	-1.92
219212_at	HSPA14	-0.522	8.4	-4.4	0.00405	0.0425	-1.93
201014_s_at	PAICS	-0.512	9.2	-4.39	0.0041	0.0428	-1.94
212141_at	MCM4	-0.538	10	-4.39	0.00412	0.0429	-1.94
212281_s_at	TMEM97	-0.514	10.4	-4.38	0.00413	0.0429	-1.95
212364_at	MYO1B	-0.686	9.26	-4.38	0.00414	0.0429	-1.95
212254_s_at	DST	-0.64	8.55	-4.38	0.00415	0.0429	-1.95
213478_at	KAZN	-0.679	7.91	-4.38	0.00415	0.0429	-1.95
219229_at	SLCO3A1	-0.639	6.78	-4.38	0.00414	0.0429	-1.95
218840_s_at	NADSYN1	0.509	8.54	4.36	0.00423	0.0433	-1.97
200934_at	DEK	-0.649	10.9	-4.35	0.00427	0.0436	-1.98
204378_at	BCAS1	-0.709	7.45	-4.35	0.00428	0.0437	-1.99
221585_at	CACNG4	-0.603	9.81	-4.34	0.00433	0.044	-2
221703_at	BRIP1	-0.821	8.85	-4.33	0.0044	0.0444	-2.02
218984_at	PUS7	-0.586	8.88	-4.32	0.00444	0.0447	-2.03
213326_at	VAMP1	0.557	7.24	4.32	0.00445	0.0447	-2.03
205573_s_at	SNX7	-0.592	8.84	-4.31	0.00446	0.0447	-2.03
207733_x_at	PSG9	0.659	8.07	4.31	0.00448	0.0448	-2.03
203630_s_at	COG5	-0.51	9.3	-4.3	0.00451	0.0451	-2.04
206280_at	CDH18	-0.574	7.93	-4.3	0.00455	0.0452	-2.05
202625_at	LYN	-0.955	6.51	-4.29	0.00457	0.0453	-2.06
204341_at	TRIM16	-0.572	8.25	-4.27	0.00469	0.0458	-2.08
202983_at	HLTF	-0.75	9.05	-4.27	0.00471	0.0458	-2.09
208921_s_at	SRI	-0.635	11	-4.26	0.00472	0.0459	-2.09
208767_s_at	LAPTM4B	0.51	12.1	4.26	0.00477	0.0461	-2.1
212675_s_at	CEP68	0.584	7.65	4.25	0.0048	0.0464	-2.11
201196_s_at	AMD1	-0.587	8.87	-4.25	0.00483	0.0465	-2.12
41037_at	TEAD4	-0.53	6.62	-4.25	0.00482	0.0465	-2.11
214718_at	GATAD1	0.506	8.97	4.24	0.00484	0.0465	-2.12
218510_x_at	RETREG1	-0.543	7.52	-4.23	0.0049	0.0468	-2.13
218897_at	TMEM177	-0.548	7.15	-4.23	0.00493	0.047	-2.14
218189_s_at	NANS	-0.625	9.91	-4.22	0.00497	0.0471	-2.15
204584_at	L1CAM	-0.586	8.58	-4.21	0.00503	0.0474	-2.16
212944_at	SLC5A3	0.638	7.87	4.21	0.00504	0.0474	-2.16
200648_s_at	GLUL	0.649	9.55	4.19	0.00512	0.0478	-2.18
214953_s_at	APP	-0.617	9.84	-4.19	0.00514	0.0478	-2.18
209604_s_at	GATA3	-0.502	13.7	-4.17	0.00528	0.0486	-2.21
212481_s_at	TPM4	-0.574	10.9	-4.14	0.00547	0.0495	-2.25

## Sheet: Table S2.GEO2R_GSE39870_all
Supplementary Table S2. List of all DEGs detected by GEO2R using GSE39870 dataset
Legend: ID, the ID of the probe for GPL571 ([HG-U133A_2] Affymetrix Human Genome U133A 2.0 Array); adj.P.Val, the p-value after the selected form of adjustment for multiple testing; P.Value, the p-value obtained from the moderated t-statistic; t, the moderated t-statistic, i.e., the ratio of the log2-fold change to its standard error; ; B, the B-statistic or log-odds that the gene is differential…
ID	adj.P.Val	P.Value	t	B	logFC	Gene.symbol	Gene.title
211163_s_at	1.65e-05	7.39e-10	24.533	11.8148	3.24874	TNFRSF10C	TNF receptor superfamily member 10c
209295_at	2.1e-05	1.89e-09	22.1756	11.2331	2.45147	TNFRSF10B	TNF receptor superfamily member 10b
207813_s_at	2.39e-05	3.22e-09	20.9288	10.8784	2.12941	FDXR	ferredoxin reductase
218346_s_at	5.59e-05	1e-08	18.5007	10.0735	1.6919	SESN1	sestrin 1
205436_s_at	5.63e-05	1.26e-08	-18.0412	9.90162	-1.49702	H2AFX	H2A histone family member X
210405_x_at	7.12e-05	1.92e-08	17.2396	9.58475	1.926	TNFRSF10B	TNF receptor superfamily member 10b
203409_at	8.3e-05	2.61e-08	16.6718	9.34639	1.42735	DDB2	damage specific DNA binding protein 2
202899_s_at	0.0001675	6.49e-08	-15.0845	8.61144	-1.25935	SRSF3	serine and arginine rich splicing factor 3
209294_x_at	0.0001675	7.02e-08	14.9537	8.54598	1.82728	TNFRSF10B	TNF receptor superfamily member 10b
209375_at	0.0001675	7.52e-08	14.8415	8.48917	1.31234	XPC	XPC complex subunit, DNA damage recognition and repair factor
215785_s_at	0.0002381	1.31e-07	13.9633	8.02328	1.227	CYFIP2	cytoplasmic FMR1 interacting protein 2
219936_s_at	0.0002381	1.31e-07	13.9633	8.02325	2.97873	GPR87	G protein-coupled receptor 87
212525_s_at	0.0002381	1.41e-07	-13.8441	7.95696	-1.30531	H2AFX	H2A histone family member X
202240_at	0.0002381	1.5e-07	-13.7536	7.90615	-1.58903	PLK1	polo like kinase 1
200974_at	0.0003128	2.11e-07	13.241	7.60968	1.23362	ACTA2	actin, alpha 2, smooth muscle, aorta
200671_s_at	0.0003778	2.85e-07	-12.8015	7.34344	-1.01234	SPTBN1	spectrin beta, non-erythrocytic 1
210230_at	0.0003778	2.98e-07	12.7363	7.30298	1.54251
203335_at	0.0003778	3.13e-07	12.6692	7.26102	1.41985	PHYH	phytanoyl-CoA 2-hydroxylase
219990_at	0.0003778	3.27e-07	-12.605	7.22062	-1.4725	E2F8	E2F transcription factor 8
208672_s_at	0.0003778	3.39e-07	-12.5552	7.18914	-1.12711	SRSF3	serine and arginine rich splicing factor 3
204962_s_at	0.0003925	3.74e-07	-12.4192	7.10226	-1.37378	SLC35F6///CENPA	solute carrier family 35 member F6///centromere protein A
208796_s_at	0.0003925	4.09e-07	12.295	7.02197	1.5281	CCNG1	cyclin G1
201236_s_at	0.0003925	4.11e-07	12.2889	7.018	1.59084	BTG2	BTG anti-proliferation factor 2
208673_s_at	0.0003925	4.23e-07	-12.249	6.99197	-1.28515	SRSF3	serine and arginine rich splicing factor 3
205386_s_at	0.0004336	5.05e-07	12.0072	6.83187	1.14954	MDM2	MDM2 proto-oncogene
219099_at	0.0004336	5.06e-07	12.0043	6.82997	1.89738	TIGAR	TP53 induced glycolysis regulatory phosphatase
220999_s_at	0.0004574	5.54e-07	11.8819	6.74739	1.01341	CYFIP2	cytoplasmic FMR1 interacting protein 2
200073_s_at	0.0004819	6.06e-07	-11.764	6.66693	-1.44173	HNRNPD	heterogeneous nuclear ribonucleoprotein D
209891_at	0.0004897	6.38e-07	-11.6962	6.62023	-1.13926	SPC25	SPC25, NDC80 kinetochore complex component
200731_s_at	0.0004965	6.69e-07	11.6337	6.57684	1.13307	PTP4A1	protein tyrosine phosphatase type IVA, member 1
205756_s_at	0.0005049	7.05e-07	11.5641	6.52829	1.002	F8	coagulation factor VIII
215719_x_at	0.0005049	7.25e-07	11.5273	6.50243	2.9513	FAS	Fas cell surface death receptor
216252_x_at	0.0005283	7.83e-07	11.4285	6.43262	2.82972	FAS	Fas cell surface death receptor
206222_at	0.0005441	8.3e-07	11.3521	6.3781	2.97132	TNFRSF10C	TNF receptor superfamily member 10c
202107_s_at	0.0005528	8.68e-07	-11.2948	6.33689	-0.934507	MCM2	minichromosome maintenance complex component 2
221139_s_at	0.0005783	9.34e-07	11.2014	6.26932	0.920703	CSAD	cysteine sulfinic acid decarboxylase
201295_s_at	0.0005789	9.62e-07	11.1644	6.24236	1.00873	WSB1	WD repeat and SOCS box containing 1
207828_s_at	0.0005789	9.87e-07	-11.1315	6.21832	-1.057	CENPF	centromere protein F
201930_at	0.000609	1.09e-06	-11.0073	6.12672	-1.11699	MCM6	minichromosome maintenance complex component 6
204781_s_at	0.000609	1.09e-06	11.0033	6.12373	1.98735	FAS	Fas cell surface death receptor
202393_s_at	0.0006182	1.16e-06	10.9351	6.07289	1.33369	KLF10	Kruppel like factor 10
201060_x_at	0.0006182	1.17e-06	10.9239	6.06452	1.27305	STOM	stomatin
216675_at	0.0006698	1.32e-06	10.766	5.94534	1.05793
211576_s_at	0.0006698	1.33e-06	-10.7576	5.93892	-1.04271	SLC19A1	solute carrier family 19 member 1
212993_at	0.0006698	1.37e-06	10.7279	5.91631	0.86986	NACC2	NACC family member 2
219258_at	0.0006698	1.4e-06	-10.7018	5.89633	-1.44485	TIPIN	TIMELESS interacting protein
203972_s_at	0.0006698	1.42e-06	-10.6844	5.88299	-0.99558	PEX3	peroxisomal biogenesis factor 3
210166_at	0.0006698	1.45e-06	10.6567	5.86165	1.00258	TLR5	toll like receptor 5
209431_s_at	0.0006698	1.47e-06	-10.6361	5.84584	-1.2869	PATZ1	POZ/BTB and AT hook containing zinc finger 1
220651_s_at	0.0007451	1.67e-06	-10.4833	5.72693	-1.05018	MCM10	minichromosome maintenance 10 replication initiation factor
209330_s_at	0.0007679	1.76e-06	-10.4236	5.67997	-1.34616	HNRNPD	heterogeneous nuclear ribonucleoprotein D
204825_at	0.0007754	1.81e-06	-10.3888	5.65252	-0.86212	MELK	maternal embryonic leucine zipper kinase
217373_x_at	0.0007823	1.87e-06	10.3487	5.62071	1.08106	MDM2	MDM2 proto-oncogene
204566_at	0.0007823	1.9e-06	10.3335	5.60858	0.922967	PPM1D	protein phosphatase, Mg2+/Mn2+ dependent 1D
204652_s_at	0.000793	1.96e-06	-10.2957	5.5784	-0.912663	NRF1	nuclear respiratory factor 1
209189_at	0.0008306	2.09e-06	10.22	5.51763	1.58461	FOS	Fos proto-oncogene, AP-1 transcription factor subunit
203725_at	0.0008787	2.25e-06	10.1335	5.44754	1.98955	GADD45A	growth arrest and DNA damage inducible alpha
213222_at	0.0008788	2.31e-06	-10.1038	5.42333	-1.10477	PLCB1	phospholipase C beta 1
218559_s_at	0.0008788	2.33e-06	10.0933	5.41474	1.21699	MAFB	MAF bZIP transcription factor B
203666_at	0.0009045	2.44e-06	10.0405	5.37147	1.21587	CXCL12	C-X-C motif chemokine ligand 12
203721_s_at	0.0009152	2.51e-06	-10.0078	5.34458	-0.85479	UTP18	UTP18, small subunit processome component
210180_s_at	0.0009516	2.65e-06	-9.94417	5.29193	-0.983047	TRA2B	transformer 2 beta homolog (Drosophila)
209049_s_at	0.0009648	2.73e-06	-9.91013	5.26362	-1.05759	ZMYND8	zinc finger MYND-type containing 8
205531_s_at	0.0009868	2.86e-06	9.85685	5.21908	2.4572	GLS2	glutaminase 2
221481_x_at	0.0009868	2.88e-06	-9.84881	5.21234	-1.41593	HNRNPD	heterogeneous nuclear ribonucleoprotein D
218007_s_at	0.0009874	2.94e-06	9.8268	5.19385	1.20527	RPS27L	ribosomal protein S27 like
200732_s_at	0.0009874	3e-06	9.80069	5.17187	1.05106	PTP4A1	protein tyrosine phosphatase type IVA, member 1
218009_s_at	0.0009874	3.01e-06	-9.79696	5.16872	-1.01039	PRC1	protein regulator of cytokinesis 1
201302_at	0.0010144	3.14e-06	9.74997	5.12898	0.946683	ANXA4	annexin A4
218970_s_at	0.001158	3.65e-06	-9.58175	4.98504	-1.00031	CUTC	cutC copper transporter
217542_at	0.001158	3.72e-06	9.56058	4.96673	0.842907	MDM2	MDM2 proto-oncogene
200730_s_at	0.001158	3.75e-06	9.55092	4.95837	1.04246	PTP4A1	protein tyrosine phosphatase type IVA, member 1
210178_x_at	0.001158	3.79e-06	-9.53902	4.94805	-0.878643	SRSF10	serine and arginine rich splicing factor 10
211042_x_at	0.0012001	4.03e-06	-9.47188	4.88959	-0.786133	MIR6756///MCAM	microRNA 6756///melanoma cell adhesion molecule
208795_s_at	0.0012001	4.08e-06	-9.45998	4.87919	-0.90068	MCM7	minichromosome maintenance complex component 7
202307_s_at	0.0012001	4.1e-06	9.45472	4.87459	1.63364	TAP1	transporter 1, ATP binding cassette subfamily B member
202017_at	0.0012001	4.15e-06	9.44082	4.86241	0.891197	EPHX1	epoxide hydrolase 1
210484_s_at	0.0012135	4.29e-06	9.40455	4.83054	1.68587	LOC254896///TNFRSF10C	uncharacterized LOC254896///TNF receptor superfamily member 10c
219628_at	0.0012135	4.3e-06	9.40062	4.82708	1.2075	ZMAT3	zinc finger matrin-type 3
218769_s_at	0.0012336	4.43e-06	9.36894	4.79913	1.32578	ANKRA2	ankyrin repeat family A member 2
209025_s_at	0.0012893	4.73e-06	-9.29772	4.73595	-0.840703	SYNCRIP	synaptotagmin binding cytoplasmic RNA interacting protein
203625_x_at	0.0012893	4.75e-06	-9.29402	4.73265	-0.97029	SKP2	S-phase kinase-associated protein 2, E3 ubiquitin protein ligase
219918_s_at	0.0014009	5.22e-06	-9.19138	4.64068	-1.25105	ASPM	abnormal spindle microtubule assembly
218704_at	0.0014031	5.29e-06	-9.17685	4.62757	-1.14112	RNF43	ring finger protein 43
207332_s_at	0.0014097	5.38e-06	9.15915	4.61158	0.889127	TFRC	transferrin receptor
203755_at	0.0014188	5.48e-06	-9.13977	4.59404	-1.2756	BUB1B	BUB1 mitotic checkpoint serine/threonine kinase B
205303_at	0.0014626	5.71e-06	-9.09502	4.55339	-1.46075	KCNJ8	potassium voltage-gated channel subfamily J member 8
203062_s_at	0.0014658	5.79e-06	-9.08049	4.54015	-0.786227	MDC1	mediator of DNA damage checkpoint 1
202330_s_at	0.0014667	5.89e-06	-9.06175	4.52303	-0.932197	UNG	uracil DNA glycosylase
213344_s_at	0.0014667	5.99e-06	-9.04531	4.50799	-0.759983	H2AFX	H2A histone family member X
214537_at	0.0014667	6.05e-06	-9.0334	4.49708	-0.776907	HIST1H1D	histone cluster 1, H1d
222087_at	0.0014667	6.06e-06	9.03271	4.49645	0.788993	MIR1204///PVT1	microRNA 1204///Pvt1 oncogene (non-protein coding)
222369_at	0.0014731	6.21e-06	-9.00625	4.47215	-0.963417	NAA40	N(alpha)-acetyltransferase 40, NatD catalytic subunit
209421_at	0.0014731	6.22e-06	-9.00515	4.47114	-0.78117	MSH2	mutS homolog 2
213331_s_at	0.0014731	6.28e-06	-8.99417	4.46103	-0.76234	NEK1	NIMA related kinase 1
209449_at	0.0015094	6.5e-06	-8.95754	4.42723	-0.708927	LSM2	LSM2 homolog, U6 small nuclear RNA and mRNA degradation associated
212510_at	0.0015751	6.86e-06	8.90193	4.37565	0.722083	GPD1L	glycerol-3-phosphate dehydrogenase 1-like
219342_at	0.0016187	7.15e-06	8.85849	4.33514	1.06562	CASD1	CAS1 domain containing 1
201555_at	0.0016187	7.3e-06	-8.8367	4.31475	-0.948733	MCM3	minichromosome maintenance complex component 3
209687_at	0.0016187	7.31e-06	8.83553	4.31365	1.31898	CXCL12	C-X-C motif chemokine ligand 12
212955_s_at	0.0016187	7.34e-06	-8.83133	4.30972	-0.810353	POLR2I	RNA polymerase II subunit I
221763_at	0.0016478	7.54e-06	-8.80262	4.28275	-0.913973	JMJD1C	jumonji domain containing 1C
208033_s_at	0.0017205	8.16e-06	-8.72216	4.20674	-0.997343	ZFHX3	zinc finger homeobox 3
203455_s_at	0.0017205	8.23e-06	8.71342	4.19843	1.01056	SAT1	spermidine/spermine N1-acetyltransferase 1
200771_at	0.0017205	8.29e-06	8.70517	4.19059	0.77724	LAMC1	laminin subunit gamma 1
204162_at	0.0017205	8.3e-06	-8.70361	4.18911	-1.60895	NDC80	NDC80, kinetochore complex component
210581_x_at	0.0017205	8.31e-06	-8.70284	4.18837	-0.79051	PATZ1	POZ/BTB and AT hook containing zinc finger 1
219928_s_at	0.0017205	8.42e-06	8.68997	4.17612	0.918593	CABYR	calcium binding tyrosine phosphorylation regulated
205304_s_at	0.0017205	8.42e-06	-8.68963	4.1758	-1.43569	KCNJ8	potassium voltage-gated channel subfamily J member 8
210561_s_at	0.0017573	8.68e-06	8.65853	4.14612	0.73446	WSB1	WD repeat and SOCS box containing 1
212977_at	0.0017802	8.87e-06	-8.63608	4.12464	-0.8926	ACKR3	atypical chemokine receptor 3
206858_s_at	0.0018446	9.35e-06	-8.58266	4.0733	-1.07397	HOXC6	homeobox C6
209075_s_at	0.0018446	9.36e-06	8.58166	4.07234	1.03392	ISCU	iron-sulfur cluster assembly enzyme
203830_at	0.0018843	9.64e-06	-8.55114	4.04287	-0.786403	C17orf75	chromosome 17 open reading frame 75
212295_s_at	0.001904	9.83e-06	-8.53176	4.02409	-0.899323	SLC7A1	solute carrier family 7 member 1
220233_at	0.0019059	9.93e-06	-8.52134	4.01399	-0.72594	FBXO17	F-box protein 17
201294_s_at	0.0019059	1e-05	8.51335	4.00623	0.964837	WSB1	WD repeat and SOCS box containing 1
218782_s_at	0.0019425	1.03e-05	-8.48559	3.97921	-0.83618	ATAD2	ATPase family, AAA domain containing 2
208691_at	0.0019814	1.06e-05	8.45713	3.95144	0.815303	TFRC	transferrin receptor
201235_s_at	0.0019994	1.09e-05	8.43145	3.92629	1.15633	BTG2	BTG anti-proliferation factor 2
219544_at	0.0019994	1.09e-05	-8.42818	3.92309	-1.01273	BORA	bora, aurora kinase A activator
205053_at	0.0019994	1.1e-05	-8.4154	3.91055	-0.775733	PRIM1	primase (DNA) subunit 1
208616_s_at	0.0019994	1.11e-05	-8.40591	3.90122	-0.74734	PTP4A2	protein tyrosine phosphatase type IVA, member 2
204780_s_at	0.0019994	1.12e-05	8.39988	3.89529	2.24804	FAS	Fas cell surface death receptor
36564_at	0.0019994	1.12e-05	8.39882	3.89425	0.69425	RNF19B	ring finger protein 19B
211715_s_at	0.0020059	1.14e-05	-8.38412	3.87977	-0.899483	BDH1	3-hydroxybutyrate dehydrogenase, type 1
200892_s_at	0.0020059	1.14e-05	-8.37974	3.87545	-0.752023	TRA2B	transformer 2 beta homolog (Drosophila)
210983_s_at	0.0020175	1.16e-05	-8.36228	3.85822	-0.861713	MCM7	minichromosome maintenance complex component 7
201061_s_at	0.0020175	1.17e-05	8.35713	3.85313	1.35954	STOM	stomatin
201993_x_at	0.0020175	1.18e-05	-8.35076	3.84683	-1.07716	HNRNPDL	heterogeneous nuclear ribonucleoprotein D like
209048_s_at	0.0020854	1.23e-05	-8.31029	3.8067	-1.09447	ZMYND8	zinc finger MYND-type containing 8
219512_at	0.0020927	1.24e-05	-8.29931	3.79578	-0.764263	DSN1	DSN1 homolog, MIS12 kinetochore complex component
205345_at	0.0021178	1.27e-05	-8.27732	3.77387	-0.808543	BARD1	BRCA1 associated RING domain 1
221640_s_at	0.0021178	1.28e-05	8.26844	3.76501	0.95554	PIDD1	p53-induced death domain protein 1
217996_at	0.0021178	1.28e-05	-8.26485	3.76142	-0.89897	PHLDA1	pleckstrin homology like domain family A member 1
208289_s_at	0.0021178	1.29e-05	8.25806	3.75464	1.11135	EI24	EI24, autophagy associated transmembrane protein
212290_at	0.0021253	1.31e-05	-8.24306	3.73963	-0.874673	SLC7A1	solute carrier family 7 member 1
221260_s_at	0.0021253	1.32e-05	8.2402	3.73676	0.805733	CSRNP2	cysteine and serine rich nuclear protein 2
216211_at	0.0021599	1.36e-05	8.20609	3.70253	0.805587	FAM208B	family with sequence similarity 208 member B
209067_s_at	0.0021599	1.38e-05	-8.19421	3.69058	-1.3974	HNRNPDL	heterogeneous nuclear ribonucleoprotein D like
218611_at	0.0021599	1.38e-05	8.19237	3.68873	1.3571	IER5	immediate early response 5
212022_s_at	0.0021599	1.39e-05	-8.18787	3.68419	-0.955713	MKI67	marker of proliferation Ki-67
204244_s_at	0.0021599	1.39e-05	-8.1837	3.67999	-1.00994	DBF4	DBF4 zinc finger
205063_at	0.0021599	1.4e-05	-8.17993	3.67619	-1.24876	GEMIN2	gem nuclear organelle associated protein 2
201301_s_at	0.0021599	1.42e-05	8.16861	3.66477	0.895737	ANXA4	annexin A4
203967_at	0.0021599	1.43e-05	-8.16189	3.65798	-0.88725	CDC6	cell division cycle 6
219627_at	0.0021599	1.43e-05	8.15786	3.6539	0.742107	ZNF767P	zinc finger family member 767, pseudogene
208814_at	0.0021599	1.43e-05	8.1558	3.65181	0.763903	HSPA4	heat shock protein family A (Hsp70) member 4
205792_at	0.0021639	1.45e-05	8.14742	3.64333	1.07692	WISP2	WNT1 inducible signaling pathway protein 2
200893_at	0.0021665	1.46e-05	-8.13972	3.63554	-0.730853	TRA2B	transformer 2 beta homolog (Drosophila)
208787_at	0.0021889	1.49e-05	-8.12233	3.6179	-0.727977	MRPL3	mitochondrial ribosomal protein L3
210609_s_at	0.0021889	1.49e-05	8.11681	3.61229	2.63158	TP53I3	tumor protein p53 inducible protein 3
205286_at	0.0022152	1.52e-05	8.09884	3.59403	0.63772	TFAP2C	transcription factor AP-2 gamma
204805_s_at	0.0023355	1.61e-05	-8.04131	3.53528	-0.860983	H1FX	H1 histone family member X
212378_at	0.0023886	1.66e-05	-8.01339	3.50663	-0.88553	GART	phosphoribosylglycinamide formyltransferase, phosphoribosylglycinamide synthetase, phosphoribosylaminoimidazole synthetase
212071_s_at	0.0023969	1.68e-05	-8.00387	3.49684	-0.931667	SPTBN1	spectrin beta, non-erythrocytic 1
201896_s_at	0.0024126	1.71e-05	-7.98795	3.48045	-0.96739	PSRC1	proline and serine rich coiled-coil 1
204709_s_at	0.0024126	1.73e-05	-7.97715	3.46931	-1.05437	KIF23	kinesin family member 23
203276_at	0.0024126	1.73e-05	-7.97625	3.46838	-1.22997	LMNB1	lamin B1
210778_s_at	0.0024126	1.73e-05	7.97326	3.4653	0.903497	MIR4800///MXD4	microRNA 4800///MAX dimerization protein 4
211784_s_at	0.0024499	1.77e-05	-7.95258	3.44392	-1.03916	SRSF1	serine and arginine rich splicing factor 1
218875_s_at	0.0024508	1.8e-05	-7.93483	3.42553	-0.87623	FBXO5	F-box protein 5
219361_s_at	0.0024508	1.81e-05	7.93322	3.42387	0.88144	AEN	apoptosis enhancing nuclease
221500_s_at	0.0024508	1.81e-05	7.92993	3.42045	0.664877	STX16	syntaxin 16
212885_at	0.0024508	1.82e-05	-7.92875	3.41923	-0.653483	MPHOSPH10	M-phase phosphoprotein 10
200733_s_at	0.0024676	1.85e-05	7.90978	3.39952	0.930033	PTP4A1	protein tyrosine phosphatase type IVA, member 1
204315_s_at	0.0024676	1.85e-05	-7.90822	3.3979	-0.927667	GTSE1	G2 and S-phase expressed 1
214141_x_at	0.0024676	1.86e-05	-7.90507	3.39462	-0.662967	SRSF7	serine and arginine rich splicing factor 7
216952_s_at	0.0024745	1.88e-05	-7.89676	3.38597	-0.699777	LMNB2	lamin B2
214746_s_at	0.0024838	1.9e-05	-7.88758	3.3764	-0.821723	ZNF467	zinc finger protein 467
216396_s_at	0.0025282	1.94e-05	7.86515	3.35299	1.14185	EI24	EI24, autophagy associated transmembrane protein
201478_s_at	0.0025804	2e-05	-7.83665	3.32316	-0.750943	MIR664B///SNORA56///DKC1	microRNA 664b///small nucleolar RNA, H/ACA box 56///dyskerin pseudouridine synthase 1
200753_x_at	0.0025804	2e-05	-7.83474	3.32116	-0.766387	MIR636///SRSF2	microRNA 636///serine and arginine rich splicing factor 2
202284_s_at	0.0026301	2.05e-05	7.81126	3.2965	1.49562	CDKN1A	cyclin dependent kinase inhibitor 1A
210592_s_at	0.0026573	2.09e-05	7.79489	3.27926	0.86344	SAT1	spermidine/spermine N1-acetyltransferase 1
212403_at	0.0026573	2.1e-05	7.79076	3.27491	0.712497	UBE3B	ubiquitin protein ligase E3B
213038_at	0.0026842	2.14e-05	7.77263	3.25578	0.8464	RNF19B	ring finger protein 19B
201664_at	0.0026842	2.14e-05	-7.77065	3.25369	-0.785843	SMC4	structural maintenance of chromosomes 4
209642_at	0.0026907	2.16e-05	-7.76309	3.2457	-1.21357	BUB1	BUB1 mitotic checkpoint serine/threonine kinase
221824_s_at	0.0026917	2.18e-05	7.754	3.23608	1.00445	MARCH8	membrane associated ring-CH-type finger 8
202153_s_at	0.0026917	2.2e-05	-7.74867	3.23044	-0.700967	NUP62	nucleoporin 62
206103_at	0.0026917	2.2e-05	-7.74715	3.22883	-0.615817	RAC3	ras-related C3 botulinum toxin substrate 3 (rho family, small GTP binding protein Rac3)
219151_s_at	0.0027492	2.26e-05	7.7222	3.20237	0.79664	RABL2A///RABL2B	RAB, member of RAS oncogene family-like 2A///RAB, member of RAS oncogene family-like 2B
208766_s_at	0.0027805	2.3e-05	-7.70651	3.18568	-0.77045	HNRNPR	heterogeneous nuclear ribonucleoprotein R
201703_s_at	0.0028107	2.33e-05	-7.69133	3.16952	-0.73336	PPP1R10	protein phosphatase 1 regulatory subunit 10
218124_at	0.0028431	2.37e-05	7.67562	3.15275	0.797687	RETSAT	retinol saturase
215068_s_at	0.0028521	2.39e-05	7.66768	3.14426	0.783087	FBXL18	F-box and leucine rich repeat protein 18
218564_at	0.00286	2.42e-05	-7.65634	3.13214	-0.886037	RFWD3	ring finger and WD repeat domain 3
214086_s_at	0.00286	2.43e-05	-7.65523	3.13095	-0.961033	PARP2	poly(ADP-ribose) polymerase 2
212949_at	0.0028758	2.45e-05	-7.6452	3.1202	-0.816923	NCAPH	non-SMC condensin I complex subunit H
203405_at	0.0028847	2.47e-05	-7.63744	3.11188	-0.677723	PSMG1	proteasome assembly chaperone 1
208863_s_at	0.0029507	2.55e-05	-7.60872	3.08102	-0.955183	SRSF1	serine and arginine rich splicing factor 1
210028_s_at	0.0029507	2.56e-05	-7.60658	3.07873	-0.673167	ORC3	origin recognition complex subunit 3
221268_s_at	0.0029507	2.57e-05	7.60203	3.07383	0.975133	SGPP1	sphingosine-1-phosphate phosphatase 1
221931_s_at	0.0030302	2.67e-05	-7.56638	3.03535	-0.777087	SEH1L	SEH1 like nucleoporin
212799_at	0.0030302	2.68e-05	7.56411	3.0329	0.642107	STX6	syntaxin 6
205413_at	0.0030302	2.68e-05	-7.5633	3.03203	-0.987567	MPPED2	metallophosphoesterase domain containing 2
212021_s_at	0.0030499	2.71e-05	-7.55266	3.0205	-0.64257	MKI67	marker of proliferation Ki-67
218755_at	0.0030768	2.76e-05	-7.53478	3.00112	-1.71327	KIF20A	kinesin family member 20A
204444_at	0.0030768	2.79e-05	-7.52724	2.99293	-0.986247	KIF11	kinesin family member 11
204957_at	0.0030768	2.79e-05	-7.52672	2.99237	-0.691323	ORC5	origin recognition complex subunit 5
211931_s_at	0.0030768	2.79e-05	-7.52618	2.99178	-0.709367	HNRNPA3///HNRNPA3P1	heterogeneous nuclear ribonucleoprotein A3///heterogeneous nuclear ribonucleoprotein A3 pseudogene 1
203420_at	0.0031056	2.83e-05	7.51198	2.97634	0.683793	FAM8A1	family with sequence similarity 8 member A1
205167_s_at	0.0031056	2.84e-05	-7.50861	2.97268	-0.673017	CDC25C	cell division cycle 25C
218663_at	0.0031235	2.87e-05	-7.49885	2.96205	-1.02081	NCAPG	non-SMC condensin I complex subunit G
214670_at	0.0032141	2.98e-05	7.46671	2.92696	0.734343	ZKSCAN1	zinc finger with KRAB and SCAN domains 1
208553_at	0.0032141	2.99e-05	-7.46383	2.9238	-0.655877	HIST1H1E	histone cluster 1, H1e
204969_s_at	0.0032213	3.01e-05	-7.45588	2.9151	-0.728543	RDX	radixin
213391_at	0.0032213	3.03e-05	-7.4495	2.90812	-0.588037	DPY19L4	dpy-19 like 4 (C. elegans)
202672_s_at	0.0032213	3.04e-05	7.44865	2.90718	1.14897	ATF3	activating transcription factor 3
202779_s_at	0.0032955	3.12e-05	-7.42359	2.87968	-0.912283	UBE2S	ubiquitin conjugating enzyme E2 S
214882_s_at	0.0033055	3.16e-05	-7.4128	2.86781	-0.836567	MIR636///SRSF2	microRNA 636///serine and arginine rich splicing factor 2
211391_s_at	0.0033055	3.17e-05	-7.40919	2.86384	-0.783013	PATZ1	POZ/BTB and AT hook containing zinc finger 1
200790_at	0.0033055	3.18e-05	7.40572	2.86001	0.625357	ODC1	ornithine decarboxylase 1
202982_s_at	0.0033055	3.19e-05	7.40379	2.85789	0.65977	ACOT1///ACOT2	acyl-CoA thioesterase 1///acyl-CoA thioesterase 2
202432_at	0.0033203	3.22e-05	7.39552	2.84878	0.678397	PPP3CB	protein phosphatase 3 catalytic subunit beta
213594_x_at	0.0033534	3.27e-05	-7.38019	2.83185	-0.78749	SRSF10	serine and arginine rich splicing factor 10
203976_s_at	0.0033534	3.28e-05	-7.37781	2.82923	-0.64157	CHAF1A	chromatin assembly factor 1 subunit A
221510_s_at	0.0033534	3.3e-05	7.37406	2.82508	1.0721	GLS	glutaminase
220582_at	0.003365	3.32e-05	7.36682	2.81707	0.779277
213883_s_at	0.0033749	3.36e-05	7.35705	2.80626	0.602853	TM2D1	TM2 domain containing 1
205339_at	0.0033749	3.36e-05	-7.35599	2.80509	-0.82778	STIL	SCL/TAL1 interrupting locus
220295_x_at	0.0034568	3.46e-05	-7.33023	2.77651	-1.11584	DEPDC1	DEP domain containing 1
201697_s_at	0.0034568	3.48e-05	-7.32515	2.77086	-0.601883	DNMT1	DNA (cytosine-5-)-methyltransferase 1
201296_s_at	0.0034568	3.49e-05	7.32225	2.76764	0.952773	WSB1	WD repeat and SOCS box containing 1
214700_x_at	0.0034835	3.53e-05	-7.31136	2.75552	-0.695337	RIF1	replication timing regulatory factor 1
203287_at	0.0034936	3.56e-05	-7.30478	2.74819	-0.735957	LAD1	ladinin 1
207996_s_at	0.0034948	3.58e-05	-7.30053	2.74345	-0.63414	LDLRAD4	low density lipoprotein receptor class A domain containing 4
204066_s_at	0.0035312	3.63e-05	-7.28729	2.72868	-0.867897	AGAP1	ArfGAP with GTPase domain, ankyrin repeat and PH domain 1
218974_at	0.0035497	3.68e-05	-7.27456	2.71446	-0.659663	SOBP	sine oculis binding protein homolog
212800_at	0.0035497	3.7e-05	7.27022	2.7096	0.760807	STX6	syntaxin 6
218027_at	0.0035497	3.7e-05	-7.2691	2.70835	-0.684773	MRPL15	mitochondrial ribosomal protein L15
209099_x_at	0.0035497	3.71e-05	7.26711	2.70613	0.8374	JAG1	jagged 1
212346_s_at	0.0035578	3.74e-05	7.26123	2.69954	0.975763	MIR4800///MXD4	microRNA 4800///MAX dimerization protein 4
218403_at	0.0035702	3.77e-05	7.25429	2.69177	0.803623	TRIAP1	TP53 regulated inhibitor of apoptosis 1
208765_s_at	0.0035983	3.81e-05	-7.2435	2.67967	-0.752887	HNRNPR	heterogeneous nuclear ribonucleoprotein R
209776_s_at	0.0036676	3.9e-05	-7.2227	2.6563	-1.14554	SLC19A1	solute carrier family 19 member 1
214138_at	0.003718	3.98e-05	7.20413	2.63539	0.821923	ZNF79	zinc finger protein 79
221638_s_at	0.003718	3.99e-05	7.20211	2.63311	0.671503	STX16	syntaxin 16
205046_at	0.003718	4.01e-05	-7.19863	2.62919	-1.14163	CENPE	centromere protein E
91816_f_at	0.003718	4.02e-05	-7.19566	2.62584	-0.73731	MEX3D	mex-3 RNA binding family member D
218532_s_at	0.0037457	4.07e-05	-7.18507	2.61388	-0.851843	FAM134B	family with sequence similarity 134 member B
208156_x_at	0.0037457	4.09e-05	7.18173	2.61011	0.91538	EPPK1	epiplakin 1
222284_at	0.0037494	4.11e-05	7.17723	2.60502	0.621033
202484_s_at	0.0037894	4.21e-05	-7.1561	2.5811	-0.63008	MBD2	methyl-CpG binding domain protein 2
200672_x_at	0.0037894	4.21e-05	-7.15429	2.57905	-0.67079	SPTBN1	spectrin beta, non-erythrocytic 1
221946_at	0.0037894	4.22e-05	-7.15257	2.5771	-0.629633	C9orf116	chromosome 9 open reading frame 116
211833_s_at	0.0037894	4.24e-05	7.14809	2.57202	1.22024	BAX	BCL2 associated X, apoptosis regulator
208922_s_at	0.0037894	4.25e-05	7.14647	2.57018	0.930263	NXF1	nuclear RNA export factor 1
202326_at	0.0037894	4.25e-05	-7.14631	2.57	-0.618813	EHMT2	euchromatic histone lysine methyltransferase 2
206095_s_at	0.0037958	4.29e-05	-7.13929	2.56203	-0.804253	SRSF10	serine and arginine rich splicing factor 10
218412_s_at	0.0037958	4.29e-05	-7.13778	2.56031	-0.690323	GTF2IRD1	GTF2I repeat domain containing 1
203987_at	0.0038074	4.32e-05	7.13158	2.55327	0.69036	FZD6	frizzled class receptor 6
211115_x_at	0.0038201	4.36e-05	-7.12516	2.54597	-0.711447	GEMIN2	gem nuclear organelle associated protein 2
204651_at	0.003846	4.41e-05	-7.11367	2.53289	-0.68139	NRF1	nuclear respiratory factor 1
209154_at	0.003846	4.43e-05	7.11093	2.52978	0.73011	P2RX5-TAX1BP3///TAX1BP3	P2RX5-TAX1BP3 readthrough (NMD candidate)///Tax1 binding protein 3
206499_s_at	0.003846	4.44e-05	-7.10884	2.52739	-0.677853	RCC1	regulator of chromosome condensation 1
208822_s_at	0.0038487	4.46e-05	-7.1048	2.52278	-0.603263	DAP3	death associated protein 3
201579_at	0.0038805	4.51e-05	7.09416	2.51065	0.79595	FAT1	FAT atypical cadherin 1
202903_at	0.0039555	4.62e-05	-7.07395	2.48754	-0.730567	LSM5	LSM5 homolog, U6 small nuclear RNA and mRNA degradation associated
201479_at	0.0039727	4.65e-05	-7.06676	2.47932	-0.65956	MIR664B///SNORA56///DKC1	microRNA 664b///small nucleolar RNA, H/ACA box 56///dyskerin pseudouridine synthase 1
206205_at	0.0039808	4.68e-05	-7.06162	2.47343	-0.940093	MPHOSPH9	M-phase phosphoprotein 9
206533_at	0.0039892	4.71e-05	-7.05644	2.4675	-0.724257	CHRNA5	cholinergic receptor nicotinic alpha 5 subunit
206140_at	0.00401	4.76e-05	-7.04769	2.45746	-1.75147	LHX2	LIM homeobox 2
218192_at	0.00401	4.77e-05	7.04526	2.45466	0.606943	IP6K2	inositol hexakisphosphate kinase 2
217997_at	0.0040302	4.81e-05	-7.03751	2.44577	-1.18937	PHLDA1	pleckstrin homology like domain family A member 1
207740_s_at	0.0040302	4.83e-05	-7.03428	2.44205	-0.77157	NUP62	nucleoporin 62
213988_s_at	0.004046	4.87e-05	7.02759	2.43437	0.685407	SAT1	spermidine/spermine N1-acetyltransferase 1
218634_at	0.0040739	4.92e-05	7.01834	2.42372	0.788993	PHLDA3	pleckstrin homology like domain family A member 3
222075_s_at	0.0041173	4.99e-05	7.00586	2.40934	0.68085	OAZ3	ornithine decarboxylase antizyme 3
218196_at	0.0041604	5.06e-05	6.99356	2.39514	0.81228	OSTM1	osteopetrosis associated transmembrane protein 1
204274_at	0.0041858	5.11e-05	-6.98505	2.38531	-0.800233	EBAG9	estrogen receptor binding site associated, antigen, 9
218355_at	0.0042686	5.23e-05	-6.96483	2.36191	-0.97088	KIF4A	kinesin family member 4A
81811_at	0.0042888	5.28e-05	6.95756	2.35348	0.648143
219037_at	0.0043059	5.33e-05	-6.94845	2.34291	-0.903383	RRP15	ribosomal RNA processing 15 homolog
204318_s_at	0.0043059	5.33e-05	-6.94782	2.34218	-0.800317	GTSE1	G2 and S-phase expressed 1
211832_s_at	0.0044825	5.57e-05	6.9099	2.29807	0.818683	MDM2	MDM2 proto-oncogene
211316_x_at	0.0044827	5.59e-05	6.90676	2.2944	0.590077	CFLAR	CASP8 and FADD like apoptosis regulator
218734_at	0.0044865	5.62e-05	-6.90293	2.28993	-0.756157	NAA40	N(alpha)-acetyltransferase 40, NatD catalytic subunit
204942_s_at	0.004528	5.69e-05	-6.8919	2.27706	-0.73258	ALDH3B2	aldehyde dehydrogenase 3 family member B2
207304_at	0.0045311	5.72e-05	-6.88825	2.27278	-0.800067	ZNF45	zinc finger protein 45
222001_x_at	0.0045312	5.74e-05	-6.88516	2.26918	-0.640377	LINC00623///LINC00869	long intergenic non-protein coding RNA 623///long intergenic non-protein coding RNA 869
208478_s_at	0.0045518	5.78e-05	6.87821	2.26104	1.12911	BAX	BCL2 associated X, apoptosis regulator
202183_s_at	0.0045696	5.83e-05	-6.87181	2.25355	-0.59927	KIF22	kinesin family member 22
209899_s_at	0.0045706	5.88e-05	-6.86414	2.24457	-0.615613	PUF60	poly(U) binding splicing factor 60
202211_at	0.0045706	5.89e-05	6.86306	2.24331	0.629767	ARFGAP3	ADP ribosylation factor GTPase activating protein 3
205356_at	0.0045706	5.91e-05	-6.8597	2.23936	-0.63711	USP13	ubiquitin specific peptidase 13 (isopeptidase T-3)
221976_s_at	0.0045706	5.92e-05	-6.85797	2.23734	-0.648043	HDGFRP3	hepatoma-derived growth factor, related protein 3
218911_at	0.0045706	5.93e-05	-6.85663	2.23576	-0.79315	YEATS4	YEATS domain containing 4
209992_at	0.0045854	5.97e-05	6.85087	2.22901	0.602383	PFKFB2	6-phosphofructo-2-kinase/fructose-2,6-biphosphatase 2
212875_s_at	0.0045862	5.99e-05	-6.84778	2.22537	-1.03614	C2CD2	C2 calcium dependent domain containing 2
212761_at	0.004633	6.07e-05	-6.83612	2.21168	-0.689267	TCF7L2	transcription factor 7 like 2
217946_s_at	0.0046536	6.14e-05	-6.82661	2.20048	-0.56613	SAE1	SUMO1 activating enzyme subunit 1
204827_s_at	0.0046536	6.14e-05	-6.82648	2.20033	-0.815643	CCNF	cyclin F
218014_at	0.0046663	6.18e-05	-6.82125	2.19417	-0.57008	NUP85	nucleoporin 85
218545_at	0.0047274	6.31e-05	-6.80275	2.17236	-0.61479	CCDC91	coiled-coil domain containing 91
204975_at	0.0047274	6.32e-05	-6.8022	2.17171	-0.604613	EMP2	epithelial membrane protein 2
215854_at	0.0047274	6.32e-05	6.80148	2.17086	0.73033
202722_s_at	0.0047766	6.44e-05	-6.78638	2.15302	-0.60522	GFPT1	glutamine--fructose-6-phosphate transaminase 1
201742_x_at	0.0047766	6.45e-05	-6.78444	2.15072	-0.68645	SRSF1	serine and arginine rich splicing factor 1
214459_x_at	0.0047766	6.47e-05	6.78248	2.1484	0.629873	HLA-C	major histocompatibility complex, class I, C
209006_s_at	0.0047766	6.49e-05	6.77963	2.14503	0.711423	RSRP1	arginine and serine rich protein 1
211543_s_at	0.0047766	6.52e-05	-6.7749	2.13943	-0.58601	GRK6	G protein-coupled receptor kinase 6
220311_at	0.0047766	6.53e-05	-6.77382	2.13815	-0.653683	N6AMT1	N-6 adenine-specific DNA methyltransferase 1 (putative)
201020_at	0.0047766	6.54e-05	-6.77284	2.13699	-0.636137	YWHAH	tyrosine 3-monooxygenase/tryptophan 5-monooxygenase activation protein eta
212320_at	0.0048414	6.65e-05	-6.75816	2.11958	-0.72163	TUBB	tubulin beta class I
204958_at	0.0048414	6.67e-05	6.75569	2.11665	0.993843	PLK3	polo like kinase 3
208956_x_at	0.0048414	6.69e-05	-6.75306	2.11354	-0.650233	DUT	deoxyuridine triphosphatase
207017_at	0.0048783	6.77e-05	-6.74386	2.10261	-0.70779	RAB27B	RAB27B, member RAS oncogene family
201586_s_at	0.0049419	6.88e-05	-6.73012	2.08627	-0.714953	SFPQ	splicing factor proline and glutamine rich
208875_s_at	0.0049768	6.96e-05	-6.7203	2.07457	-0.69364	PAK2	p21 (RAC1) activated kinase 2
218480_at	0.0049768	6.97e-05	6.71872	2.07268	0.724253	AGBL5	ATP/GTP binding protein like 5
219650_at	0.0049849	7e-05	-6.71464	2.06781	-0.925863	ERCC6L	ERCC excision repair 6 like, spindle assembly checkpoint helicase
203598_s_at	0.0050356	7.13e-05	6.69952	2.04977	0.604493	WBP4	WW domain binding protein 4
221485_at	0.0050356	7.13e-05	6.69921	2.0494	0.622387	B4GALT5	beta-1,4-galactosyltransferase 5
215191_at	0.0050356	7.15e-05	6.69762	2.04751	0.63189
200907_s_at	0.0050356	7.17e-05	-6.69533	2.04477	-0.765607	PALLD	palladin, cytoskeletal associated protein
210582_s_at	0.0050563	7.24e-05	6.68691	2.03471	0.919947	LIMK2	LIM domain kinase 2
218535_s_at	0.0050563	7.24e-05	-6.68656	2.03429	-0.704833	RIOK2	RIO kinase 2
221222_s_at	0.0051465	7.41e-05	6.66721	2.0111	0.67594	C1orf56	chromosome 1 open reading frame 56
200037_s_at	0.0051465	7.44e-05	-6.6632	2.0063	-0.72058	CBX3	chromobox 3
203159_at	0.0051465	7.45e-05	6.66199	2.00484	0.75762	GLS	glutaminase
213427_at	0.0051465	7.46e-05	-6.66115	2.00384	-0.78652	RPP40	ribonuclease P/MRP subunit p40
208659_at	0.0051827	7.54e-05	-6.65266	1.99365	-0.52893	CLIC1	chloride intracellular channel 1
204734_at	0.0052309	7.63e-05	6.64229	1.98118	0.562577	KRT15	keratin 15
210793_s_at	0.0052921	7.76e-05	-6.62805	1.96405	-0.79898	NUP98	nucleoporin 98
200687_s_at	0.0052921	7.77e-05	-6.62736	1.96322	-0.562057	SF3B3	splicing factor 3b subunit 3
203343_at	0.0053392	7.86e-05	-6.61739	1.9512	-0.575627	UGDH	UDP-glucose 6-dehydrogenase
211219_s_at	0.0053434	7.89e-05	-6.61417	1.94732	-0.990607	LHX2	LIM homeobox 2
221884_at	0.0053441	7.92e-05	-6.61153	1.94413	-1.48593	MECOM	MDS1 and EVI1 complex locus
201867_s_at	0.0053874	8.02e-05	-6.60055	1.93088	-0.84212	TBL1X	transducin (beta)-like 1X-linked
212137_at	0.0053874	8.05e-05	-6.59727	1.92691	-0.606137	LARP1	La ribonucleoprotein domain family member 1
212462_at	0.0053874	8.09e-05	-6.59386	1.92279	-0.566957	KAT6B	lysine acetyltransferase 6B
218350_s_at	0.0053874	8.1e-05	-6.59257	1.92123	-0.666363	GMNN	geminin, DNA replication inhibitor
206723_s_at	0.0053874	8.1e-05	-6.59218	1.92077	-0.563363	LPAR2	lysophosphatidic acid receptor 2
219077_s_at	0.0054043	8.15e-05	-6.58707	1.91458	-0.96392	WWOX	WW domain containing oxidoreductase
212160_at	0.0054845	8.3e-05	-6.5723	1.89668	-0.523023	XPOT	exportin for tRNA
210074_at	0.0055421	8.42e-05	6.55994	1.8817	0.628407	CTSV	cathepsin V
205160_at	0.0055421	8.43e-05	6.55866	1.88014	0.780347	PEX11A	peroxisomal biogenesis factor 11 alpha
202095_s_at	0.0055529	8.47e-05	-6.55459	1.8752	-0.758107	BIRC5	baculoviral IAP repeat containing 5
200749_at	0.0055569	8.51e-05	-6.55154	1.87149	-0.55241	RAN	RAN, member RAS oncogene family
212445_s_at	0.0055952	8.59e-05	-6.54318	1.86134	-0.676963	NEDD4L	neural precursor cell expressed, developmentally down-regulated 4-like, E3 ubiquitin protein ligase
206683_at	0.0055952	8.63e-05	-6.53957	1.85694	-1.23572	ZNF165	zinc finger protein 165
210947_s_at	0.0055952	8.64e-05	-6.53854	1.85569	-0.559713	MSH3	mutS homolog 3
208991_at	0.0056211	8.71e-05	6.53188	1.84758	0.699507	STAT3	signal transducer and activator of transcription 3
203282_at	0.0056211	8.73e-05	6.52988	1.84515	0.67429	GBE1	glucan (1,4-alpha-), branching enzyme 1
202691_at	0.0056586	8.84e-05	-6.51933	1.83229	-0.517907	SNRPD1	small nuclear ribonucleoprotein D1 polypeptide
209201_x_at	0.0056586	8.86e-05	6.51736	1.82989	0.596327	CXCR4	C-X-C motif chemokine receptor 4
212111_at	0.0056586	8.87e-05	6.51704	1.8295	0.766043	STX12	syntaxin 12
206566_at	0.0056586	8.89e-05	-6.51484	1.82681	-0.80704	SLC7A1	solute carrier family 7 member 1
217010_s_at	0.0056778	8.95e-05	-6.50966	1.82049	-0.614197	CDC25C	cell division cycle 25C
209520_s_at	0.0057553	9.09e-05	-6.49607	1.80388	-0.543017	NCBP1	nuclear cap binding protein subunit 1
213116_at	0.0057581	9.12e-05	-6.49333	1.80053	-0.580257	NEK3	NIMA related kinase 3
204484_at	0.0058106	9.23e-05	-6.48348	1.78848	-0.73709	PIK3C2B	phosphatidylinositol-4-phosphate 3-kinase catalytic subunit type 2 beta
204128_s_at	0.005817	9.3e-05	-6.47788	1.78162	-0.799473	RFC3	replication factor C subunit 3
219236_at	0.005817	9.36e-05	6.472	1.77441	0.696987	PAQR6	progestin and adipoQ receptor family member 6
60815_at	0.005817	9.37e-05	6.4715	1.7738	0.72108	POLR2J4	RNA polymerase II subunit J4, pseudogene
215136_s_at	0.005817	9.37e-05	-6.47119	1.77341	-0.823313	EXOSC8	exosome component 8
203418_at	0.005817	9.37e-05	-6.47099	1.77317	-1.07352	CCNA2	cyclin A2
220441_at	0.0058283	9.42e-05	-6.46709	1.76839	-1.09979	DNAJC22	DnaJ heat shock protein family (Hsp40) member C22
201129_at	0.0058398	9.46e-05	-6.46318	1.76359	-0.557447	SRSF7	serine and arginine rich splicing factor 7
221582_at	0.0058608	9.54e-05	6.45614	1.75495	0.77889	HIST3H2A	histone cluster 3, H2a
204822_at	0.0058608	9.57e-05	-6.45428	1.75266	-1.08401	TTK	TTK protein kinase
218205_s_at	0.0058608	9.58e-05	6.4534	1.75157	0.558473	MKNK2	MAP kinase interacting serine/threonine kinase 2
210779_x_at	0.0059018	9.67e-05	-6.44539	1.74173	-1.01722	GEMIN2	gem nuclear organelle associated protein 2
204023_at	0.005902	9.7e-05	-6.44311	1.73893	-0.680427	RFC4	replication factor C subunit 4
206364_at	0.0059848	9.86e-05	-6.42941	1.72205	-1.50512	KIF14	kinesin family member 14
218399_s_at	0.0060035	9.92e-05	-6.42461	1.71615	-0.527893	CDCA4	cell division cycle associated 4
219020_at	0.0060292	9.99e-05	6.41888	1.70907	0.54991	HS1BP3	HCLS1 binding protein 3
216988_s_at	0.0060666	0.000101	-6.41157	1.70006	-0.572027	PTP4A2	protein tyrosine phosphatase type IVA, member 2
221746_at	0.0062067	0.000103	-6.39065	1.6742	-0.61987	UBL4A	ubiquitin like 4A
208758_at	0.0062459	0.000104	-6.3833	1.66509	-0.643797	ATIC	5-aminoimidazole-4-carboxamide ribonucleotide formyltransferase/IMP cyclohydrolase
211013_x_at	0.0062777	0.000105	6.37491	1.65469	0.89454	PML	promyelocytic leukemia
213164_at	0.0062777	0.000105	6.37476	1.65451	0.805653	SLC5A3	solute carrier family 5 member 3
209998_at	0.0063136	0.000106	-6.36793	1.64604	-0.616283	PIGO	phosphatidylinositol glycan anchor biosynthesis class O
217299_s_at	0.0064014	0.000108	-6.35343	1.62803	-0.903653	NBN	nibrin
204278_s_at	0.0064014	0.000108	-6.35231	1.62664	-0.65162	EBAG9	estrogen receptor binding site associated, antigen, 9
202693_s_at	0.006418	0.000109	6.34805	1.62134	0.696143	STK17A	serine/threonine kinase 17a
213508_at	0.0064292	0.000109	6.34363	1.61584	0.98616	SPTSSA	serine palmitoyltransferase small subunit A
206929_s_at	0.0064292	0.00011	-6.34041	1.61183	-0.606173	NFIC	nuclear factor I C
213189_at	0.0064292	0.00011	-6.33939	1.61056	-0.881627	MINA	MYC induced nuclear antigen
208165_s_at	0.0064292	0.00011	-6.33805	1.6089	-0.81892	PRSS16	protease, serine 16
211899_s_at	0.0064565	0.000111	6.33247	1.60195	0.579123	TRAF4	TNF receptor associated factor 4
208510_s_at	0.0065365	0.000113	-6.31892	1.58505	-0.74806	PPARG	peroxisome proliferator activated receptor gamma
220500_s_at	0.0065365	0.000113	6.31808	1.584	0.626003	RABL2A///RABL2B	RAB, member of RAS oncogene family-like 2A///RAB, member of RAS oncogene family-like 2B
202794_at	0.0065365	0.000113	6.31612	1.58155	1.11972	INPP1	inositol polyphosphate-1-phosphatase
222118_at	0.0066925	0.000116	-6.29333	1.55308	-0.898847	CENPN	centromere protein N
59437_at	0.0066925	0.000117	-6.29279	1.5524	-0.658647	C9orf116	chromosome 9 open reading frame 116
201361_at	0.0066958	0.000117	-6.2903	1.54928	-0.676337	TMEM109	transmembrane protein 109
206052_s_at	0.0066967	0.000117	-6.28812	1.54655	-0.6599	SLBP	stem-loop binding protein
218157_x_at	0.00672	0.000118	6.28323	1.54042	0.585173	CDC42SE1	CDC42 small effector 1
217475_s_at	0.0067775	0.000119	6.27426	1.52919	1.28834	LIMK2	LIM domain kinase 2
213632_at	0.0068063	0.00012	-6.26878	1.5223	-0.51818	DHODH	dihydroorotate dehydrogenase (quinone)
213923_at	0.0068544	0.000121	6.26104	1.51259	0.622993	RAP2B	RAP2B, member of RAS oncogene family
218080_x_at	0.0068825	0.000122	-6.25284	1.50229	-0.559527	FAF1	Fas associated factor 1
215084_s_at	0.0068825	0.000123	-6.25094	1.49989	-0.51256	LRRC42	leucine rich repeat containing 42
204835_at	0.0068825	0.000123	-6.24997	1.49867	-0.564207	POLA1	DNA polymerase alpha 1, catalytic subunit
203543_s_at	0.0068825	0.000123	6.24958	1.49819	0.897803	KLF9	Kruppel like factor 9
212846_at	0.0068973	0.000124	-6.24357	1.49062	-0.598007	RRP1B	ribosomal RNA processing 1B
218349_s_at	0.0068973	0.000124	-6.24347	1.49049	-0.842823	ZWILCH	zwilch kinetochore protein
221045_s_at	0.0068973	0.000124	-6.24133	1.4878	-0.655977	PER3	period circadian clock 3
220192_x_at	0.0068973	0.000125	-6.23934	1.48529	-0.742363	SPDEF	SAM pointed domain containing ETS transcription factor
204203_at	0.0068973	0.000125	-6.23627	1.48143	-0.690187	CEBPG	CCAAT/enhancer binding protein gamma
202659_at	0.0068973	0.000125	6.23579	1.48083	0.517177	PSMB10	proteasome subunit beta 10
221258_s_at	0.0069728	0.000127	-6.22363	1.46549	-0.688907	KIF18A	kinesin family member 18A
205093_at	0.0069728	0.000127	-6.22145	1.46274	-0.51186	PLEKHA6	pleckstrin homology domain containing A6
210278_s_at	0.0069728	0.000127	6.22107	1.46226	0.709633	AP4S1	adaptor related protein complex 4 sigma 1 subunit
209681_at	0.00708	0.00013	6.20683	1.44428	0.615273	SLC19A2	solute carrier family 19 member 2
200993_at	0.0070961	0.00013	6.20305	1.43949	0.56771	IPO7	importin 7
202848_s_at	0.007129	0.000131	-6.19737	1.43232	-0.58964	GRK6	G protein-coupled receptor kinase 6
204759_at	0.0071382	0.000132	6.19438	1.42853	0.60336	RCBTB2	RCC1 and BTB domain containing protein 2
211519_s_at	0.0071626	0.000132	-6.1897	1.42261	-0.642557	KIF2C	kinesin family member 2C
212404_s_at	0.0072292	0.000134	6.18034	1.41074	0.58224	UBE3B	ubiquitin protein ligase E3B
201300_s_at	0.0072617	0.000135	6.17482	1.40374	0.920357	PRNP	prion protein
217906_at	0.0072751	0.000136	6.17141	1.39941	0.626817	KLHDC2	kelch domain containing 2
221577_x_at	0.0073422	0.000137	6.16214	1.38765	1.66839	GDF15	growth differentiation factor 15
213677_s_at	0.0073576	0.000138	-6.15551	1.37922	-0.724463	PMS1	PMS1 homolog 1, mismatch repair system component
222152_at	0.0073576	0.000138	6.15436	1.37776	0.515277	PDCD6	programmed cell death 6
217974_at	0.0073576	0.000139	6.1527	1.37565	0.599557	TM7SF3	transmembrane 7 superfamily member 3
221191_at	0.0073576	0.000139	6.14941	1.37147	0.531993	STAG3L3	stromal antigen 3-like 3 (pseudogene)
208793_x_at	0.0073576	0.000139	-6.14902	1.37097	-0.503043	SMARCA4	SWI/SNF related, matrix associated, actin dependent regulator of chromatin, subfamily a, member 4
203499_at	0.0073712	0.00014	6.14479	1.36559	1.12916	EPHA2	EPH receptor A2
204752_x_at	0.0073712	0.000141	-6.14166	1.3616	-0.680693	PARP2	poly(ADP-ribose) polymerase 2
205031_at	0.0073712	0.000141	-6.14029	1.35985	-0.764937	EFNB3	ephrin B3
202193_at	0.0073712	0.000141	6.14003	1.35952	0.85468	LIMK2	LIM domain kinase 2
204999_s_at	0.0073744	0.000142	6.136	1.35439	0.676373	ATF5	activating transcription factor 5
220052_s_at	0.0073744	0.000142	6.13594	1.35431	0.5441	TINF2	TERF1 interacting nuclear factor 2
212563_at	0.0073775	0.000142	-6.13224	1.3496	-0.898167	MIR7112///BOP1	microRNA 7112///block of proliferation 1
210052_s_at	0.0073775	0.000143	-6.13125	1.34834	-0.953893	TPX2	TPX2, microtubule nucleation factor
213338_at	0.0073775	0.000143	6.13005	1.3468	0.762407	TMEM158	transmembrane protein 158 (gene/pseudogene)
219494_at	0.0073789	0.000143	-6.12756	1.34363	-0.737183	RAD54B	RAD54 homolog B (S. cerevisiae)
200904_at	0.0073789	0.000143	6.1262	1.3419	0.834627	HLA-E	major histocompatibility complex, class I, E
37590_g_at	0.0074568	0.000146	6.11418	1.32654	0.534987
209667_at	0.0074587	0.000146	6.11215	1.32396	0.664333	CES2	carboxylesterase 2
205085_at	0.0075246	0.000148	-6.10333	1.31269	-0.75819	ORC1	origin recognition complex subunit 1
205393_s_at	0.0075987	0.000149	-6.09374	1.30041	-0.68245	CHEK1	checkpoint kinase 1
210117_at	0.0076043	0.00015	6.08979	1.29535	0.704277	SPAG1	sperm associated antigen 1
213298_at	0.0076043	0.00015	-6.08954	1.29504	-0.599287	NFIC	nuclear factor I C
202911_at	0.0077456	0.000153	-6.07305	1.27389	-0.69365	MSH6	mutS homolog 6
201386_s_at	0.0077456	0.000154	-6.07135	1.27171	-0.741187	DHX15	DEAH-box helicase 15
206247_at	0.0077603	0.000154	6.06806	1.26748	1.02283	MICB	MHC class I polypeptide-related sequence B
205500_at	0.0078962	0.000157	-6.05255	1.24754	-0.565657	C5	complement component 5
205024_s_at	0.0079813	0.000159	-6.0423	1.23436	-0.596037	RAD51	RAD51 recombinase
219785_s_at	0.008034	0.000161	-6.03503	1.22499	-0.516753	C16orf95	chromosome 16 open reading frame 95
214909_s_at	0.008034	0.000161	-6.03299	1.22236	-0.5355	DDAH2	dimethylarginine dimethylaminohydrolase 2
216526_x_at	0.008034	0.000162	6.03181	1.22084	0.73483	HLA-C	major histocompatibility complex, class I, C
218726_at	0.0080422	0.000162	-6.02925	1.21753	-0.7456	HJURP	Holliday junction recognition protein
203978_at	0.0081333	0.000164	-6.01775	1.2027	-0.504733	NUBP1	nucleotide binding protein 1
221665_s_at	0.0081333	0.000165	-6.01512	1.1993	-0.556567	EPS8L1	EPS8 like 1
202905_x_at	0.0081641	0.000166	-6.00843	1.19065	-0.752543	NBN	nibrin
211763_s_at	0.0081641	0.000167	-6.00767	1.18967	-0.673703	UBE2B	ubiquitin conjugating enzyme E2 B
219502_at	0.0081641	0.000167	-6.0067	1.18842	-0.658903	NEIL3	nei like DNA glycosylase 3
202870_s_at	0.0081641	0.000167	-6.00522	1.18651	-1.28196	CDC20	cell division cycle 20
210389_x_at	0.0082281	0.000169	-5.99736	1.17633	-0.586203	TUBD1	tubulin delta 1
202907_s_at	0.0082374	0.000169	-5.99476	1.17296	-0.921913	NBN	nibrin
210754_s_at	0.0083361	0.000172	-5.98369	1.15863	-0.780693	LYN	LYN proto-oncogene, Src family tyrosine kinase
45653_at	0.0083736	0.000173	5.97707	1.15004	0.534733	KCTD13	potassium channel tetramerization domain containing 13
219154_at	0.0083736	0.000173	5.97635	1.1491	0.532827	TMEM120B	transmembrane protein 120B
214258_x_at	0.0083736	0.000174	-5.97506	1.14743	-0.6282	KAT5	lysine acetyltransferase 5
207574_s_at	0.0084159	0.000175	5.96941	1.1401	0.70633	GADD45B	growth arrest and DNA damage inducible beta
215773_x_at	0.0084333	0.000176	-5.96611	1.1358	-0.659447	PARP2	poly(ADP-ribose) polymerase 2
218886_at	0.0084361	0.000176	-5.96416	1.13328	-0.692177	PAK1IP1	PAK1 interacting protein 1
221050_s_at	0.0084512	0.000177	-5.96109	1.12928	-0.745723	GTPBP2	GTP binding protein 2
212020_s_at	0.0084549	0.000177	-5.95906	1.12665	-0.591913	MKI67	marker of proliferation Ki-67
208314_at	0.0084845	0.000178	5.95465	1.12092	0.58405	RRH	retinal pigment epithelium-derived rhodopsin homolog
212973_at	0.0085228	0.000179	5.94947	1.11417	0.519993	RPIA	ribose 5-phosphate isomerase A
218866_s_at	0.0086121	0.000182	-5.93965	1.10139	-0.755583	POLR3K	RNA polymerase III subunit K
209151_x_at	0.0086975	0.000184	-5.93029	1.08919	-0.630677	TCF3	transcription factor 3
204857_at	0.008722	0.000185	-5.92645	1.08417	-0.607933	MAD1L1	MAD1 mitotic arrest deficient like 1
218112_at	0.0087261	0.000186	-5.92328	1.08004	-0.559713	MRPS34	mitochondrial ribosomal protein S34
59625_at	0.0087261	0.000186	-5.92198	1.07834	-0.639403	NOL3	nucleolar protein 3
218662_s_at	0.0087261	0.000186	-5.91994	1.07567	-0.721653	NCAPG	non-SMC condensin I complex subunit G
213226_at	0.0087261	0.000186	-5.9195	1.0751	-0.893377	CCNA2	cyclin A2
204941_s_at	0.0087511	0.000188	-5.914	1.06792	-0.574307	ALDH3B2	aldehyde dehydrogenase 3 family member B2
204299_at	0.0087511	0.000188	-5.91116	1.0642	-1.02527	SRSF10	serine and arginine rich splicing factor 10
200897_s_at	0.0087511	0.000189	-5.91091	1.06388	-0.602177	PALLD	palladin, cytoskeletal associated protein
214404_x_at	0.0087511	0.000189	-5.90876	1.06106	-0.714373	SPDEF	SAM pointed domain containing ETS transcription factor
217684_at	0.0088513	0.000192	5.89543	1.04362	0.54746	TYMS	thymidylate synthetase
202650_s_at	0.0089999	0.000197	5.87849	1.02141	0.540477	MIR6785///TMEM94	microRNA 6785///transmembrane protein 94
222250_s_at	0.0089999	0.000197	-5.87544	1.01741	-0.529493	INTS7	integrator complex subunit 7
205394_at	0.0089999	0.000198	-5.87444	1.0161	-0.855447	CHEK1	checkpoint kinase 1
212660_at	0.0089999	0.000198	-5.8731	1.01435	-0.588417	JADE2	jade family PHD finger 2
222216_s_at	0.0089999	0.000198	-5.87251	1.01357	-0.51869	MRPL17	mitochondrial ribosomal protein L17
218471_s_at	0.0089999	0.000199	5.87021	1.01055	0.594083	BBS1	Bardet-Biedl syndrome 1
203158_s_at	0.0089999	0.000199	5.86948	1.00959	0.91871	GLS	glutaminase
213195_at	0.0089999	0.000199	5.8682	1.00792	0.739963	LYRM9	LYR motif containing 9
202626_s_at	0.0090233	0.000201	-5.86305	1.00115	-1.04719	LYN	LYN proto-oncogene, Src family tyrosine kinase
218176_at	0.0090716	0.000202	-5.85736	0.99366	-0.574397	MAGEF1	MAGE family member F1
202219_at	0.0090856	0.000203	5.85461	0.99004	1.27778	SLC6A8	solute carrier family 6 member 8
221326_s_at	0.0091368	0.000204	-5.8487	0.98227	-0.65298	TUBD1	tubulin delta 1
204317_at	0.0091529	0.000205	-5.84446	0.97669	-0.608523	TRMU///GTSE1	tRNA 5-methylaminomethyl-2-thiouridylate methyltransferase///G2 and S-phase expressed 1
219038_at	0.0091529	0.000205	5.84424	0.9764	1.2059	MORC4	MORC family CW-type zinc finger 4
214474_at	0.0091754	0.000206	5.84029	0.97119	0.609953	PRKAB2	protein kinase AMP-activated non-catalytic subunit beta 2
202246_s_at	0.0091754	0.000207	-5.83925	0.96983	-0.583393	CDK4	cyclin dependent kinase 4
202450_s_at	0.0091885	0.000207	5.83661	0.96635	0.5609	CTSK	cathepsin K
210827_s_at	0.0093066	0.000211	5.82404	0.94977	0.540147	ELF3	E74 like ETS transcription factor 3
221521_s_at	0.0093066	0.000212	-5.82081	0.94549	-0.795907	GINS2	GINS complex subunit 2
204250_s_at	0.0093066	0.000212	5.81983	0.9442	0.524833	CEP164	centrosomal protein 164
213242_x_at	0.0093066	0.000212	5.81948	0.94374	0.73697	CEP170B	centrosomal protein 170B
219932_at	0.0093066	0.000212	-5.81849	0.94243	-0.63718	SLC27A6	solute carrier family 27 member 6
212745_s_at	0.0093066	0.000213	5.8176	0.94126	0.546	BBS4	Bardet-Biedl syndrome 4
210774_s_at	0.0094408	0.000217	5.80218	0.92087	0.519347	NCOA4	nuclear receptor coactivator 4
213913_s_at	0.0094408	0.000218	-5.79986	0.9178	-0.91236	TBC1D30	TBC1 domain family member 30
202094_at	0.0094408	0.000218	-5.79859	0.91612	-0.602613	BIRC5	baculoviral IAP repeat containing 5
210001_s_at	0.0094408	0.000218	5.79799	0.91533	0.68772	SOCS1	suppressor of cytokine signaling 1
201041_s_at	0.0094408	0.000218	5.79754	0.91473	0.648067	DUSP1	dual specificity phosphatase 1
200754_x_at	0.0094705	0.00022	-5.79286	0.90854	-0.760773	MIR636///SRSF2	microRNA 636///serine and arginine rich splicing factor 2
202806_at	0.0094705	0.00022	-5.79158	0.90683	-0.964253	DBN1	drebrin 1
203270_at	0.0095117	0.000222	-5.78584	0.89923	-0.615743	DTYMK	deoxythymidylate kinase
209348_s_at	0.0095563	0.000223	5.78077	0.8925	0.60189	MAF	MAF bZIP transcription factor
209140_x_at	0.0095786	0.000224	5.77614	0.88637	0.607643	HLA-B	major histocompatibility complex, class I, B
221652_s_at	0.0095786	0.000225	-5.77478	0.88456	-0.6848	ASUN	asunder, spermatogenesis regulator
210312_s_at	0.0095786	0.000225	5.77246	0.88148	0.615277	IFT20	intraflagellar transport 20
201835_s_at	0.0095786	0.000226	5.77205	0.88093	0.80659	PRKAB1	protein kinase AMP-activated non-catalytic subunit beta 1
201801_s_at	0.0095786	0.000226	-5.77163	0.88037	-0.7798	SLC29A1	solute carrier family 29 member 1 (Augustine blood group)
201663_s_at	0.0095917	0.000226	-5.76912	0.87705	-0.731913	SMC4	structural maintenance of chromosomes 4
204092_s_at	0.0097423	0.000231	-5.75427	0.85731	-0.71676	AURKA	aurora kinase A
212334_at	0.0097741	0.000232	5.75033	0.85205	0.636227	GNS	glucosamine (N-acetyl)-6-sulfatase
214415_at	0.0097809	0.000233	5.74819	0.84921	0.511917	PLGLB1///PLGLB2	plasminogen-like B1///plasminogen-like B2
212511_at	0.0097809	0.000233	-5.74637	0.84679	-0.58582	PICALM	phosphatidylinositol binding clathrin assembly protein
202425_x_at	0.0097809	0.000234	-5.74546	0.84557	-0.561	PPP3CA	protein phosphatase 3 catalytic subunit alpha
204379_s_at	0.0097809	0.000234	5.74403	0.84367	0.63123	FGFR3	fibroblast growth factor receptor 3
218941_at	0.0098117	0.000235	-5.7395	0.83763	-0.529297	FBXW2	F-box and WD repeat domain containing 2
216641_s_at	0.0098117	0.000236	-5.73866	0.83652	-0.64157	LAD1	ladinin 1
209175_at	0.0098167	0.000237	-5.73551	0.83232	-0.545483	SEC23IP	SEC23 interacting protein
201755_at	0.0099343	0.00024	-5.72499	0.81829	-0.769087	MCM5	minichromosome maintenance complex component 5
217028_at	0.0099644	0.000241	5.72127	0.81331	0.979113	CXCR4	C-X-C motif chemokine receptor 4
216268_s_at	0.0099949	0.000242	5.71752	0.80831	0.853733	JAG1	jagged 1
216105_x_at	0.0100113	0.000243	-5.71382	0.80337	-0.50401	PTPA	protein phosphatase 2 phosphatase activator
201690_s_at	0.0100113	0.000244	-5.71345	0.80286	-0.603597	TPD52	tumor protein D52
209775_x_at	0.010012	0.000244	-5.71199	0.80092	-0.520483	SLC19A1	solute carrier family 19 member 1
209155_s_at	0.0100912	0.000246	-5.70458	0.791	-0.64529	NT5C2	5-nucleotidase, cytosolic II
212112_s_at	0.0101183	0.000248	5.70095	0.78615	0.642303	STX12	syntaxin 12
215464_s_at	0.0101183	0.000248	5.69946	0.78415	0.66121	P2RX5-TAX1BP3///TAX1BP3///P2RX5	P2RX5-TAX1BP3 readthrough (NMD candidate)///Tax1 binding protein 3///purinergic receptor P2X 5
202251_at	0.0101183	0.000248	-5.69835	0.78267	-0.641063	PRPF3	pre-mRNA processing factor 3
218585_s_at	0.01017	0.000252	-5.68899	0.77014	-0.61088	DTL	denticleless E3 ubiquitin protein ligase homolog
204039_at	0.01017	0.000252	5.68892	0.77004	0.737977	CEBPA	CCAAT/enhancer binding protein alpha
204146_at	0.0101976	0.000253	-5.68548	0.76542	-0.844353	RAD51AP1	RAD51 associated protein 1
210933_s_at	0.0102318	0.000254	5.68025	0.75841	2.02627	FSCN1	fascin actin-bundling protein 1
206928_at	0.0102318	0.000254	5.68018	0.75833	0.763867	ZNF124	zinc finger protein 124
209408_at	0.0102453	0.000256	-5.6765	0.75339	-0.824943	KIF2C	kinesin family member 2C
211097_s_at	0.0102453	0.000256	-5.67547	0.752	-0.583747	PBX2	PBX homeobox 2
203782_s_at	0.0102453	0.000257	-5.67372	0.74965	-0.53915	POLRMT	RNA polymerase mitochondrial
203588_s_at	0.0103106	0.000259	-5.6656	0.73874	-0.594867	TFDP2	transcription factor Dp-2
201891_s_at	0.0103106	0.00026	5.66482	0.7377	0.855613	B2M	beta-2-microglobulin
222208_s_at	0.0104175	0.000263	5.65468	0.72406	0.584727	POLR2J4	RNA polymerase II subunit J4, pseudogene
35148_at	0.0104175	0.000263	-5.6543	0.72355	-0.50927	TJP3	tight junction protein 3
203565_s_at	0.0104285	0.000264	-5.65215	0.72067	-0.62522	MNAT1	MNAT1, CDK activating kinase assembly factor
206414_s_at	0.0105013	0.000266	-5.64554	0.71177	-0.620053	ASAP2	ArfGAP with SH3 domain, ankyrin repeat and PH domain 2
202633_at	0.0105281	0.000268	-5.64091	0.70553	-0.541727	TOPBP1	topoisomerase (DNA) II binding protein 1
217783_s_at	0.0105281	0.000268	5.6396	0.70376	0.902727	YPEL5	yippee like 5
222240_s_at	0.0105375	0.000269	5.63755	0.701	0.70145	ISYNA1	inositol-3-phosphate synthase 1
213400_s_at	0.0105375	0.00027	-5.63627	0.69927	-0.6142	TBL1X	transducin (beta)-like 1X-linked
204633_s_at	0.0107991	0.000277	5.61641	0.67247	0.53333	RPS6KA5	ribosomal protein S6 kinase A5
208079_s_at	0.0108569	0.000279	-5.61106	0.66523	-0.777303	AURKA	aurora kinase A
214500_at	0.0108778	0.000281	5.60519	0.6573	0.60752	H2AFY	H2A histone family member Y
209184_s_at	0.0108778	0.000281	5.60435	0.65616	0.691433	IRS2	insulin receptor substrate 2
208070_s_at	0.0109296	0.000283	5.59946	0.64955	0.57455	REV3L	REV3 like, DNA directed polymerase zeta catalytic subunit
201773_at	0.0109316	0.000284	-5.59671	0.64583	-0.63918	ADNP	activity dependent neuroprotector homeobox
213302_at	0.0109721	0.000286	-5.59133	0.63854	-0.669413	PFAS	phosphoribosylformylglycinamidine synthase
204977_at	0.0110769	0.00029	-5.58159	0.62533	-0.54363	DDX10	DEAD-box helicase 10
206043_s_at	0.0111229	0.000292	-5.57589	0.61761	-0.503557	ATP2C2	ATPase secretory pathway Ca2+ transporting 2
202954_at	0.0111527	0.000294	-5.56991	0.60949	-0.844683	UBE2C	ubiquitin conjugating enzyme E2 C
205769_at	0.0111527	0.000295	-5.56942	0.60882	-0.52932	SLC27A2	solute carrier family 27 member 2
203284_s_at	0.0111527	0.000295	-5.56877	0.60793	-0.60135	HS2ST1	heparan sulfate 2-O-sulfotransferase 1
203035_s_at	0.0112207	0.000297	-5.56292	0.59999	-0.522087	PIAS3	protein inhibitor of activated STAT 3
213188_s_at	0.0112356	0.000298	-5.56066	0.59691	-0.87279	MINA	MYC induced nuclear antigen
220840_s_at	0.0112519	0.000299	-5.5583	0.5937	-0.717523	C1orf112	chromosome 1 open reading frame 112
208992_s_at	0.0112769	0.0003	5.55537	0.58972	0.56249	STAT3	signal transducer and activator of transcription 3
208812_x_at	0.011343	0.000303	5.5495	0.58174	0.738817	HLA-C	major histocompatibility complex, class I, C
201183_s_at	0.011343	0.000303	-5.54846	0.58032	-0.51109	CHD4	chromodomain helicase DNA binding protein 4
212436_at	0.0114182	0.000305	-5.54225	0.57186	-0.501713	TRIM33	tripartite motif containing 33
200621_at	0.0114363	0.000306	-5.53981	0.56854	-0.764913	CSRP1	cysteine and glycine rich protein 1
209711_at	0.0114596	0.000308	5.53512	0.56214	0.521933	SLC35D1	solute carrier family 35 member D1
201702_s_at	0.0114596	0.000309	-5.5347	0.56158	-0.735537	PPP1R10	protein phosphatase 1 regulatory subunit 10
203123_s_at	0.0114596	0.000309	5.53453	0.56133	0.597853	SLC11A2	solute carrier family 11 member 2
202431_s_at	0.011469	0.000309	-5.53267	0.5588	-0.658703	MYC	v-myc avian myelocytomatosis viral oncogene homolog
209098_s_at	0.0116685	0.000315	5.51852	0.5395	0.737793	JAG1	jagged 1
214710_s_at	0.011713	0.000318	-5.51221	0.53087	-0.98434	CCNB1	cyclin B1
204059_s_at	0.011713	0.000318	-5.51197	0.53055	-0.653203	ME1	malic enzyme 1
201972_at	0.0117682	0.000321	5.50599	0.52237	0.58658	ATP6V1A	ATPase H+ transporting V1 subunit A
207688_s_at	0.0118662	0.000324	-5.49858	0.51223	-0.63533	INHBC	inhibin beta C subunit
201937_s_at	0.011867	0.000325	-5.49686	0.50987	-0.513277	DNPEP	aspartyl aminopeptidase
204126_s_at	0.011867	0.000326	-5.49461	0.5068	-0.70775	CDC45	cell division cycle 45
212033_at	0.011867	0.000327	-5.49245	0.50384	-0.585893	RBM25	RNA binding motif protein 25
205596_s_at	0.011867	0.000327	5.4915	0.50254	0.554563	SMURF2	SMAD specific E3 ubiquitin protein ligase 2
204417_at	0.011867	0.000327	5.4912	0.50213	0.77501	GALC	galactosylceramidase
204285_s_at	0.0119214	0.000329	5.48659	0.49581	1.2773	PMAIP1	phorbol-12-myristate-13-acetate-induced protein 1
209192_x_at	0.0120013	0.000332	-5.4804	0.48733	-0.60238	KAT5	lysine acetyltransferase 5
215285_s_at	0.0120026	0.000333	-5.47675	0.48231	-0.538223	PHTF1	putative homeodomain transcription factor 1
221962_s_at	0.0120026	0.000335	5.47285	0.47696	0.501303	UBE2H	ubiquitin conjugating enzyme E2 H
202457_s_at	0.0120026	0.000335	-5.47282	0.47693	-0.583947	PPP3CA	protein phosphatase 3 catalytic subunit alpha
219720_s_at	0.0120026	0.000336	5.47204	0.47586	0.64875	GPATCH2L	G-patch domain containing 2 like
201443_s_at	0.0120026	0.000336	5.47149	0.4751	0.5618	ATP6AP2	ATPase H+ transporting accessory protein 2
211212_s_at	0.0120026	0.000336	-5.47042	0.47363	-0.53756	ORC5	origin recognition complex subunit 5
205060_at	0.0120343	0.000338	5.46638	0.46808	0.621523	PARG	poly(ADP-ribose) glycohydrolase
212335_at	0.0120709	0.00034	5.46175	0.46172	0.613483	GNS	glucosamine (N-acetyl)-6-sulfatase
222209_s_at	0.01209	0.000341	-5.4594	0.45849	-0.93826	TMEM135	transmembrane protein 135
209917_s_at	0.0120985	0.000344	5.45356	0.45046	0.651507	TP53TG1	TP53 target 1 (non-protein coding)
219335_at	0.0120985	0.000345	-5.45233	0.44876	-0.514747	ARMCX5	armadillo repeat containing, X-linked 5
215891_s_at	0.0120985	0.000345	5.45219	0.44857	0.56673	GM2A	GM2 ganglioside activator
212858_at	0.0120985	0.000345	-5.45073	0.44656	-0.515387	PAQR4	progestin and adipoQ receptor family member 4
218288_s_at	0.0120985	0.000345	5.45066	0.44647	0.555027	CCDC90B	coiled-coil domain containing 90B
212599_at	0.0122707	0.000352	5.43678	0.42735	0.834473	AUTS2	autism susceptibility candidate 2
202725_at	0.0122707	0.000352	5.43669	0.42723	0.548117	POLR2A	RNA polymerase II subunit A
202671_s_at	0.0123205	0.000354	-5.43253	0.4215	-0.611797	PDXK	pyridoxal (pyridoxine, vitamin B6) kinase
221755_at	0.0123444	0.000355	-5.42994	0.41793	-0.554227	EHBP1L1	EH domain binding protein 1 like 1
204127_at	0.0124518	0.000359	-5.42237	0.40748	-0.61536	RFC3	replication factor C subunit 3
205287_s_at	0.0124934	0.000362	5.41661	0.39953	0.55162	TFAP2C	transcription factor AP-2 gamma
201802_at	0.0124934	0.000362	-5.41629	0.39909	-0.667317	SLC29A1	solute carrier family 29 member 1 (Augustine blood group)
214878_at	0.0124934	0.000362	5.41579	0.39839	0.738547	LOC101929740///ZNF37A	zinc finger protein 761-like///zinc finger protein 37A
208900_s_at	0.0125046	0.000363	5.41351	0.39524	0.67978	TOP1	topoisomerase (DNA) I
201385_at	0.0126564	0.000369	-5.40231	0.37976	-0.618077	DHX15	DEAH-box helicase 15
217403_s_at	0.0127726	0.000373	-5.39403	0.3683	-0.62201	ZNF227	zinc finger protein 227
222031_at	0.0127726	0.000374	5.39247	0.36613	0.834523	LOC389906	zinc finger protein 839 pseudogene
209526_s_at	0.0127853	0.000375	-5.38917	0.36157	-0.696663	HDGFRP3	hepatoma-derived growth factor, related protein 3
202589_at	0.0128205	0.000378	5.38446	0.35505	0.522363	TYMS	thymidylate synthetase
214760_at	0.0128205	0.000378	5.3837	0.35399	0.642827	ZNF337	zinc finger protein 337
201195_s_at	0.0128674	0.000381	5.37861	0.34693	1.6302	SLC7A5	solute carrier family 7 member 5
217019_at	0.0129136	0.000383	5.37397	0.3405	0.617953
201202_at	0.0130089	0.000388	5.36414	0.32685	0.655567	PCNA	proliferating cell nuclear antigen
212722_s_at	0.0130089	0.000388	-5.36412	0.32683	-0.54842	JMJD6	arginine demethylase and lysine hydroxylase
218183_at	0.0130303	0.00039	5.36181	0.32361	0.623423	CDIP1	cell death inducing p53 target 1
216959_x_at	0.0131672	0.000394	-5.35302	0.3114	-0.747907	NRCAM	neuronal cell adhesion molecule
203344_s_at	0.0132004	0.000396	-5.35007	0.3073	-0.507877	RBBP8	RB binding protein 8, endonuclease
218800_at	0.0132832	0.0004	-5.34282	0.2972	-0.50958	SRD5A3	steroid 5 alpha-reductase 3
204817_at	0.0132832	0.000401	-5.34107	0.29476	-0.58549	ESPL1	extra spindle pole bodies like 1, separase
203855_at	0.0132832	0.000401	5.34085	0.29445	0.53627	WDR47	WD repeat domain 47
222380_s_at	0.0132832	0.000401	5.34001	0.29329	0.71235	PDCD6	programmed cell death 6
205187_at	0.0133173	0.000403	5.33704	0.28915	0.567313	SMAD5	SMAD family member 5
221311_x_at	0.013448	0.000409	-5.32661	0.27462	-0.533247	LYRM2	LYR motif containing 2
219553_at	0.013448	0.000409	-5.32631	0.2742	-0.61343	NME7	NME/NM23 family member 7
204492_at	0.013448	0.00041	-5.32359	0.27039	-0.62954	ARHGAP11A	Rho GTPase activating protein 11A
200603_at	0.013448	0.000411	5.32278	0.26927	0.504887	PRKAR1A	protein kinase cAMP-dependent type I regulatory subunit alpha
219860_at	0.013448	0.000411	-5.32264	0.26907	-0.50936	LY6G5C	lymphocyte antigen 6 complex, locus G5C
206102_at	0.0134495	0.000412	-5.32066	0.26632	-0.69136	GINS1	GINS complex subunit 1
219583_s_at	0.0134495	0.000413	5.31967	0.26493	0.709263	SPATA7	spermatogenesis associated 7
203836_s_at	0.0134495	0.000414	-5.31794	0.26252	-0.646243	MAP3K5	mitogen-activated protein kinase kinase kinase 5
217914_at	0.013551	0.000417	5.31137	0.25334	0.502527	TPCN1	two pore segment channel 1
211450_s_at	0.0136112	0.000421	-5.30495	0.24436	-0.65801	MSH6	mutS homolog 6
221280_s_at	0.0136131	0.000423	-5.30211	0.24039	-0.527067	PARD3	par-3 family cell polarity regulator
202293_at	0.0136131	0.000423	-5.30167	0.23978	-0.68107	STAG1	stromal antigen 1
210111_s_at	0.0136541	0.000425	5.29842	0.23523	0.60995	KLHDC10	kelch domain containing 10
203372_s_at	0.0136815	0.000426	-5.2959	0.23171	-0.897203	SOCS2	suppressor of cytokine signaling 2
221006_s_at	0.0137144	0.000428	5.29309	0.22778	0.502323	SNX27	sorting nexin family member 27
215109_at	0.0137491	0.00043	5.28915	0.22226	0.532083	RC3H1	ring finger and CCCH-type domains 1
215537_x_at	0.0137556	0.000431	-5.28776	0.22031	-0.65902	DDAH2	dimethylarginine dimethylaminohydrolase 2
219148_at	0.0137583	0.000432	-5.28553	0.21719	-1.04233	PBK	PDZ binding kinase
203888_at	0.013819	0.000435	5.28128	0.21123	0.97829	THBD	thrombomodulin
208978_at	0.0139413	0.000441	-5.27091	0.1967	-0.58801	CRIP2	cysteine rich protein 2
214755_at	0.0139413	0.000441	-5.27088	0.19664	-0.74917	UAP1L1	UDP-N-acetylglucosamine pyrophosphorylase 1 like 1
205292_s_at	0.0139413	0.000441	-5.27071	0.19641	-0.66106	HNRNPA2B1	heterogeneous nuclear ribonucleoprotein A2/B1
208926_at	0.0139999	0.000444	5.26578	0.18948	0.735243	NEU1	neuraminidase 1 (lysosomal sialidase)
206036_s_at	0.0139999	0.000444	-5.26559	0.18922	-0.688457	REL	REL proto-oncogene, NF-kB subunit
218853_s_at	0.0141315	0.000449	5.25776	0.17822	0.66381	MOSPD1	motile sperm domain containing 1
208370_s_at	0.0141772	0.000452	5.25336	0.17204	0.651047	RCAN1	regulator of calcineurin 1
212233_at	0.014227	0.000454	-5.24979	0.16702	-0.619653	MAP1B	microtubule associated protein 1B
209304_x_at	0.0142366	0.000456	5.24693	0.163	0.50111	GADD45B	growth arrest and DNA damage inducible beta
217610_at	0.0142366	0.000456	5.24601	0.1617	0.6061	SPDYE2	speedy/RINGO cell cycle regulator family member E2
206066_s_at	0.0142366	0.000456	5.24597	0.16165	0.58757	RAD51C	RAD51 paralog C
201286_at	0.0142366	0.000457	5.24522	0.16059	0.5625	SDC1	syndecan 1
205858_at	0.0142936	0.00046	5.24021	0.15354	0.744027	NGFR	nerve growth factor receptor
213844_at	0.0142936	0.000461	5.23928	0.15223	0.573917	HOXA5	homeobox A5
203201_at	0.0143529	0.000464	-5.23365	0.1443	-0.718487	PMM2	phosphomannomutase 2
218435_at	0.0143529	0.000464	-5.23345	0.14403	-0.717743	DNAJC15	DnaJ heat shock protein family (Hsp40) member C15
213014_at	0.0144973	0.000471	-5.22297	0.12925	-0.51198	MAPK8IP1	mitogen-activated protein kinase 8 interacting protein 1
203503_s_at	0.014543	0.000475	-5.21775	0.12189	-0.592337	PEX14	peroxisomal biogenesis factor 14
219518_s_at	0.014543	0.000475	5.21698	0.1208	0.80904	ELL3	elongation factor for RNA polymerase II 3
206452_x_at	0.014543	0.000476	-5.2162	0.1197	-0.513803	PTPA	protein phosphatase 2 phosphatase activator
203542_s_at	0.014543	0.000476	5.21618	0.11967	0.80846	KLF9	Kruppel like factor 9
216228_s_at	0.014543	0.000476	-5.21571	0.119	-0.665763	WDHD1	WD repeat and HMG-box DNA binding protein 1
204478_s_at	0.0145743	0.000478	-5.21316	0.11541	-0.525373	RABIF	RAB interacting factor
221887_s_at	0.0146086	0.000479	5.21047	0.1116	0.59695	WHRN	whirlin
91826_at	0.0146154	0.000481	-5.20815	0.10833	-0.504187	EPS8L1	EPS8 like 1
212095_s_at	0.0146745	0.000484	-5.20326	0.10143	-0.58566	MTUS1	microtubule associated tumor suppressor 1
219161_s_at	0.0147267	0.000487	-5.19851	0.09471	-0.64091	CKLF-CMTM1///CKLF	CKLF-CMTM1 readthrough///chemokine like factor
217025_s_at	0.0147267	0.000488	-5.19775	0.09363	-0.58884	DBN1	drebrin 1
212030_at	0.0147458	0.000489	-5.19583	0.09092	-0.534797	RBM25	RNA binding motif protein 25
201631_s_at	0.0147496	0.00049	5.19467	0.08928	0.583457	IER3	immediate early response 3
211714_x_at	0.0148926	0.000496	-5.18575	0.07665	-0.68869	TUBB	tubulin beta class I
219306_at	0.0149118	0.000497	-5.18385	0.07396	-0.727277	KIF15	kinesin family member 15
202111_at	0.0151026	0.000504	-5.17371	0.05958	-0.52119	SLC4A2	solute carrier family 4 member 2
222270_at	0.0152144	0.000509	-5.16646	0.0493	-0.79512	PPP4R3B	protein phosphatase 4 regulatory subunit 3B
200994_at	0.0152918	0.000513	5.16184	0.04275	0.62231	IPO7	importin 7
212720_at	0.0152949	0.000514	5.16073	0.04117	0.590267	PAPOLA	poly(A) polymerase alpha
217844_at	0.0153283	0.000515	-5.15819	0.03757	-0.70641	CTDSP1	CTD small phosphatase 1
211392_s_at	0.0154097	0.00052	-5.15151	0.02807	-0.657547	PATZ1	POZ/BTB and AT hook containing zinc finger 1
204516_at	0.0157075	0.000532	5.13481	0.00432	0.537367	ATXN7	ataxin 7
201182_s_at	0.0157387	0.000536	-5.1301	-0.00239	-0.51035	CHD4	chromodomain helicase DNA binding protein 4
209932_s_at	0.0157387	0.000537	-5.12816	-0.00515	-0.51379	DUT	deoxyuridine triphosphatase
219938_s_at	0.0157387	0.000538	5.12698	-0.00683	0.589077	PSTPIP2	proline-serine-threonine phosphatase interacting protein 2
214507_s_at	0.0157465	0.00054	-5.1246	-0.01023	-0.596763	EXOSC2	exosome component 2
221922_at	0.0158458	0.000545	-5.11785	-0.01984	-0.705877	GPSM2	G-protein signaling modulator 2
202262_x_at	0.015908	0.000548	-5.11354	-0.026	-0.56195	DDAH2	dimethylarginine dimethylaminohydrolase 2
204055_s_at	0.0159101	0.000549	5.11251	-0.02746	0.503367	CTAGE5	CTAGE family member 5, ER export factor
218424_s_at	0.0159648	0.000553	5.10726	-0.03495	0.652227	STEAP3	STEAP3 metalloreductase
219423_x_at	0.0160117	0.000556	-5.10331	-0.0406	-0.59273	TNFRSF25	TNF receptor superfamily member 25
205110_s_at	0.0161092	0.000561	-5.09712	-0.04944	-1.13975	FGF13	fibroblast growth factor 13
222028_at	0.0162815	0.000571	-5.08475	-0.06714	-0.607937	ZNF45	zinc finger protein 45
34726_at	0.0162856	0.000574	-5.08117	-0.07226	-0.589087	CACNB3	calcium voltage-gated channel auxiliary subunit beta 3
214030_at	0.0162856	0.000574	-5.08086	-0.07271	-0.511243	CRYBG3	crystallin beta-gamma domain containing 3
205910_s_at	0.0163627	0.00058	5.07409	-0.0824	0.570093	CEL	carboxyl ester lipase
214696_at	0.0164566	0.000584	5.06803	-0.0911	0.65076	MIR22///MIR22HG	microRNA 22///MIR22 host gene
221773_at	0.0164566	0.000585	-5.0675	-0.09186	-0.555247	ELK3	ELK3, ETS transcription factor
200617_at	0.0165235	0.000589	5.06261	-0.09887	0.56461	MLEC	malectin
209345_s_at	0.016568	0.000591	5.0598	-0.1029	0.632053	PI4K2A	phosphatidylinositol 4-kinase type 2 alpha
38158_at	0.0165694	0.000593	-5.05815	-0.10526	-0.544167	ESPL1	extra spindle pole bodies like 1, separase
209723_at	0.0165694	0.000593	5.05794	-0.10556	0.626203	SERPINB9	serpin family B member 9
212454_x_at	0.016633	0.000597	-5.05261	-0.11322	-1.12685	HNRNPDL	heterogeneous nuclear ribonucleoprotein D like
211814_s_at	0.016633	0.000597	-5.05254	-0.11331	-0.59714	CCNE2	cyclin E2
205399_at	0.0166441	0.000598	-5.05118	-0.11528	-0.596473	DCLK1	doublecortin like kinase 1
214658_at	0.016651	0.0006	5.04911	-0.11825	0.513303	TMED7-TICAM2///TMED7	TMED7-TICAM2 readthrough///transmembrane p24 trafficking protein 7
205266_at	0.0166746	0.000602	5.04721	-0.12097	0.749253	LIF	leukemia inhibitory factor
208433_s_at	0.0168078	0.000608	-5.03978	-0.13165	-0.95035	LRP8	LDL receptor related protein 8
214728_x_at	0.0168294	0.000611	-5.036	-0.13709	-0.512617	SMARCA4	SWI/SNF related, matrix associated, actin dependent regulator of chromatin, subfamily a, member 4
201370_s_at	0.0168294	0.000612	-5.03535	-0.13803	-0.56545	CUL3	cullin 3
218816_at	0.016854	0.000614	-5.03343	-0.14078	-0.567573	LRRC1	leucine rich repeat containing 1
222037_at	0.0169603	0.00062	-5.02547	-0.15225	-0.614097	MCM4	minichromosome maintenance complex component 4
212966_at	0.0169603	0.000621	5.02515	-0.15271	0.799087	HIC2	hypermethylated in cancer 2
215747_s_at	0.0169603	0.000621	-5.0246	-0.1535	-0.513557	RCC1	regulator of chromosome condensation 1
206953_s_at	0.0169669	0.000622	-5.02346	-0.15515	-0.595807	ADGRL2	adhesion G protein-coupled receptor L2
211114_x_at	0.0169893	0.000624	-5.021	-0.15869	-0.724527	GEMIN2	gem nuclear organelle associated protein 2
219680_at	0.0169893	0.000625	5.02078	-0.159	0.501663	NLRX1	NLR family member X1
203806_s_at	0.0172554	0.000637	-5.00633	-0.17985	-0.50563	FANCA	Fanconi anemia complementation group A
204970_s_at	0.0172554	0.000637	5.00631	-0.17988	0.543587	MAFG	MAF bZIP transcription factor G
221436_s_at	0.0172825	0.00064	-5.00347	-0.18396	-0.699657	CDCA3	cell division cycle associated 3
213912_at	0.0174438	0.000648	-4.99518	-0.19595	-0.70826	TBC1D30	TBC1 domain family member 30
212096_s_at	0.0174552	0.000652	-4.99082	-0.20225	-0.74741	MTUS1	microtubule associated tumor suppressor 1
202983_at	0.0174552	0.000652	-4.99031	-0.20298	-0.74979	HLTF	helicase like transcription factor
201578_at	0.0174552	0.000652	4.98995	-0.2035	0.534027	PODXL	podocalyxin like
210362_x_at	0.0174552	0.000653	4.98946	-0.20421	0.612693	PML	promyelocytic leukemia
208502_s_at	0.0174552	0.000653	-4.98875	-0.20524	-0.561097	PITX1	paired like homeodomain 1
201117_s_at	0.0175354	0.000657	4.98466	-0.21115	0.540377	CPE	carboxypeptidase E
217644_s_at	0.0176442	0.000663	4.9786	-0.21992	0.567833	SOS2	SOS Ras/Rho guanine nucleotide exchange factor 2
201719_s_at	0.0176839	0.000665	-4.97616	-0.22344	-0.5774	EPB41L2	erythrocyte membrane protein band 4.1 like 2
216231_s_at	0.0176928	0.000669	4.97244	-0.22883	0.693983	B2M	beta-2-microglobulin
207695_s_at	0.0177408	0.000672	4.96942	-0.23321	0.805923	IGSF1	immunoglobulin superfamily member 1
202271_at	0.0177408	0.000673	4.96813	-0.23507	0.523693	FBXO28	F-box protein 28
201313_at	0.0177408	0.000673	-4.96802	-0.23523	-0.52204	ENO2	enolase 2
205519_at	0.0177423	0.000674	-4.96713	-0.23653	-0.81153	WDR76	WD repeat domain 76
210400_at	0.0177754	0.000676	4.96498	-0.23965	1.05563	GRIN2C	glutamate ionotropic receptor NMDA type subunit 2C
205240_at	0.0179254	0.000684	-4.95651	-0.25192	-0.579253	GPSM2	G-protein signaling modulator 2
222077_s_at	0.0179254	0.000684	-4.9561	-0.25252	-0.74932	RACGAP1	Rac GTPase activating protein 1
218788_s_at	0.0179254	0.000686	-4.95457	-0.25474	-0.59256	SMYD3	SET and MYND domain containing 3
205492_s_at	0.0179289	0.000687	4.9531	-0.25686	0.91305	DPYSL4	dihydropyrimidinase like 4
216237_s_at	0.0179559	0.00069	-4.9504	-0.26079	-0.828553	MCM5	minichromosome maintenance complex component 5
218180_s_at	0.0180047	0.000695	4.94565	-0.26768	0.607087	EPS8L2	EPS8 like 2
221058_s_at	0.0180047	0.000696	-4.94392	-0.2702	-0.6259	CKLF	chemokine like factor
221591_s_at	0.0180047	0.000697	-4.94356	-0.27072	-0.764393	FAM64A	family with sequence similarity 64 member A
204510_at	0.0180523	0.0007	-4.94057	-0.27506	-0.59506	CDC7	cell division cycle 7
205135_s_at	0.0180555	0.000701	-4.93913	-0.27715	-0.576567	NUFIP1	NUFIP1, FMR1 interacting protein 1
210791_s_at	0.0181217	0.000704	-4.93574	-0.28207	-0.636143	ARHGAP32	Rho GTPase activating protein 32
221561_at	0.0181387	0.000707	-4.93307	-0.28597	-0.533937	SOAT1	sterol O-acyltransferase 1
202625_at	0.0181387	0.00071	-4.93063	-0.2895	-0.954737	LYN	LYN proto-oncogene, Src family tyrosine kinase
211911_x_at	0.0181387	0.000711	4.92919	-0.29161	0.61272	HLA-B	major histocompatibility complex, class I, B
212835_at	0.0181387	0.000712	4.92862	-0.29244	0.506037	FAM175B	family with sequence similarity 175 member B
202531_at	0.0182339	0.000716	4.92413	-0.29896	0.662027	IRF1	interferon regulatory factor 1
54632_at	0.0182367	0.000717	-4.92322	-0.30029	-0.76908	THADA	THADA, armadillo repeat containing
212079_s_at	0.0184619	0.000731	4.91018	-0.31928	0.523703	KMT2A	lysine methyltransferase 2A
208939_at	0.0184619	0.000731	-4.90981	-0.31983	-0.570173	SEPHS1	selenophosphate synthetase 1
203626_s_at	0.0187363	0.000748	-4.89332	-0.34388	-0.61112	SKP2	S-phase kinase-associated protein 2, E3 ubiquitin protein ligase
209306_s_at	0.0188687	0.000755	4.88741	-0.35251	0.57707	SWAP70	SWAP switching B-cell complex 70kDa subunit
203764_at	0.0189117	0.000758	-4.8841	-0.35734	-1.18849	DLGAP5	DLG associated protein 5
204612_at	0.0189117	0.000759	-4.88347	-0.35827	-0.805777	PKIA	protein kinase (cAMP-dependent, catalytic) inhibitor alpha
218189_s_at	0.0189931	0.000766	-4.87734	-0.36723	-0.62526	NANS	N-acetylneuraminate synthase
213017_at	0.0190954	0.000772	4.87148	-0.3758	0.8097	ABHD3	abhydrolase domain containing 3
212164_at	0.0190954	0.000772	4.87125	-0.37614	0.609883	TMEM183B///TMEM183A	transmembrane protein 183B///transmembrane protein 183A
213843_x_at	0.0192238	0.000779	4.86509	-0.38515	0.960783	SLC6A8	solute carrier family 6 member 8
209482_at	0.0192512	0.000783	-4.86201	-0.38967	-0.55448	POP7	POP7 homolog, ribonuclease P/MRP subunit
201196_s_at	0.0194806	0.000795	-4.85096	-0.40585	-0.58702	AMD1	adenosylmethionine decarboxylase 1
212730_at	0.0194806	0.000796	4.84999	-0.40728	0.849377	SYNM	synemin
205573_s_at	0.0195146	0.000799	-4.84761	-0.41077	-0.592437	SNX7	sorting nexin 7
205161_s_at	0.0195372	0.000801	4.84559	-0.41374	0.512797	PEX11A	peroxisomal biogenesis factor 11 alpha
41037_at	0.0195372	0.000802	-4.84528	-0.41419	-0.530303	TEAD4	TEA domain transcription factor 4
207124_s_at	0.0197497	0.000813	-4.83545	-0.42861	-0.531577	GNB5	G protein subunit beta 5
218840_s_at	0.0198828	0.00082	4.82981	-0.4369	0.509397	NADSYN1	NAD synthetase 1
209617_s_at	0.0198828	0.00082	-4.82926	-0.43771	-1.06846	CTNND2	catenin delta 2
212512_s_at	0.019918	0.000824	-4.82599	-0.44251	-0.68227	CARM1	coactivator associated arginine methyltransferase 1
213326_at	0.019918	0.000824	4.82576	-0.44286	0.556517	VAMP1	vesicle associated membrane protein 1
212141_at	0.0199567	0.000827	-4.82365	-0.44595	-0.538307	MCM4	minichromosome maintenance complex component 4
209610_s_at	0.0200338	0.000831	-4.81988	-0.4515	-0.51055	SLC1A4	solute carrier family 1 member 4
222249_at	0.0202777	0.000845	4.80883	-0.46777	0.507857
207501_s_at	0.0204593	0.000854	-4.80112	-0.47912	-0.987287	FGF12	fibroblast growth factor 12
218885_s_at	0.0204778	0.000856	-4.7996	-0.48136	-0.635053	GALNT12	polypeptide N-acetylgalactosaminyltransferase 12
218237_s_at	0.0205031	0.000861	-4.79549	-0.48741	-0.64737	SLC38A1	solute carrier family 38 member 1
216867_s_at	0.0205031	0.000861	4.79517	-0.48789	0.640603	PDGFA	platelet derived growth factor subunit A
218631_at	0.0205406	0.000865	4.79271	-0.49151	0.61323	AVPI1	arginine vasopressin induced 1
213115_at	0.0205406	0.000865	4.79242	-0.49194	0.576957	ATG4A	autophagy related 4A cysteine peptidase
209464_at	0.020614	0.000873	-4.78632	-0.50095	-0.63736	AURKB	aurora kinase B
219050_s_at	0.0208056	0.000883	-4.77839	-0.51266	-0.504697	ZNHIT2	zinc finger HIT-type containing 2
200934_at	0.0209042	0.000891	-4.77146	-0.5229	-0.648747	DEK	DEK proto-oncogene
202945_at	0.0209533	0.000894	-4.76911	-0.52637	-0.5151	FPGS	folylpolyglutamate synthase
203881_s_at	0.0210338	0.0009	4.76522	-0.53212	0.614717	DMD	dystrophin
207549_x_at	0.0211122	0.000908	4.75881	-0.5416	0.533203	CD46	CD46 molecule
212992_at	0.0212497	0.000916	4.75293	-0.55031	1.36629	AHNAK2	AHNAK nucleoprotein 2
208313_s_at	0.0212497	0.000916	-4.75288	-0.55037	-0.544143	SF1	splicing factor 1
209574_s_at	0.0213088	0.00092	-4.74932	-0.55565	-0.62247	LDLRAD4	low density lipoprotein receptor class A domain containing 4
203340_s_at	0.0213088	0.000921	-4.74881	-0.55641	-0.690263	SLC25A12	solute carrier family 25 member 12
217833_at	0.0213226	0.000923	-4.74764	-0.55813	-0.666423	SYNCRIP	synaptotagmin binding cytoplasmic RNA interacting protein
211116_at	0.0217121	0.000943	-4.7323	-0.58089	-0.52264	SLC9A2	solute carrier family 9 member A2
218536_at	0.0217747	0.000947	4.7296	-0.58489	0.544283	MRS2	MRS2, magnesium transporter
202177_at	0.0217973	0.00095	4.72756	-0.58792	0.52135	GAS6	growth arrest specific 6
213375_s_at	0.0217973	0.000952	4.72607	-0.59012	0.516527	N4BP2L1	NEDD4 binding protein 2 like 1
218510_x_at	0.0217973	0.000953	-4.72539	-0.59114	-0.542883	FAM134B	family with sequence similarity 134 member B
202948_at	0.0217973	0.000953	-4.72536	-0.59119	-1.38634	IL1R1	interleukin 1 receptor type 1
203303_at	0.0218734	0.000957	4.72224	-0.59583	0.5944	DYNLT3	dynein light chain Tctex-type 3
215043_s_at	0.0218757	0.000958	-4.72146	-0.59698	-0.581427	GUSBP3///SMA5///SMA4	glucuronidase, beta pseudogene 3///glucuronidase beta pseudogene///glucuronidase beta pseudogene
221703_at	0.0220095	0.000967	-4.71512	-0.6064	-0.821133	BRIP1	BRCA1 interacting protein C-terminal helicase 1
209442_x_at	0.0220095	0.000968	-4.71486	-0.60678	-0.75431	ANK3	ankyrin 3, node of Ranvier (ankyrin G)
204060_s_at	0.0220095	0.000968	4.71444	-0.60741	0.501203	PRKY///PRKX	protein kinase, Y-linked, pseudogene///protein kinase, X-linked
213076_at	0.0220435	0.000973	4.71128	-0.61211	0.5058	ITPKC	inositol-trisphosphate 3-kinase C
208753_s_at	0.0221437	0.000979	4.70675	-0.61884	0.512507	NAP1L1	nucleosome assembly protein 1 like 1
210567_s_at	0.0221437	0.00098	-4.70606	-0.61987	-0.584927	SKP2	S-phase kinase-associated protein 2, E3 ubiquitin protein ligase
47553_at	0.0222295	0.000986	4.70201	-0.6259	0.767223	WHRN	whirlin
212397_at	0.0223485	0.000993	-4.69695	-0.63343	-0.65685	RDX	radixin
204793_at	0.0223584	0.000995	4.69595	-0.63491	0.553637	GPRASP1	G protein-coupled receptor associated sorting protein 1
206752_s_at	0.0223617	0.000996	-4.69516	-0.63609	-0.667327	DFFB	DNA fragmentation factor subunit beta
215942_s_at	0.0223819	0.001	-4.69177	-0.64114	-0.825727	GTSE1	G2 and S-phase expressed 1
206503_x_at	0.0223955	0.001	4.69067	-0.64278	0.589983	PML	promyelocytic leukemia
202906_s_at	0.0226438	0.00102	-4.67762	-0.66224	-0.71479	NBN	nibrin
210854_x_at	0.0226607	0.00103	4.67303	-0.66909	1.08267	SLC6A8	solute carrier family 6 member 8
204944_at	0.0226951	0.00103	-4.66996	-0.67367	-0.814543	PTPRG	protein tyrosine phosphatase, receptor type G
220225_at	0.0227736	0.00104	-4.66692	-0.67821	-0.915503	IRX4	iroquois homeobox 4
212215_at	0.0227884	0.00104	4.66542	-0.68045	0.55837	PREPL	prolyl endopeptidase-like
212254_s_at	0.0228071	0.00104	-4.66322	-0.68374	-0.639837	DST	dystonin
214349_at	0.0229839	0.00106	4.65458	-0.69664	0.522213
204082_at	0.0229929	0.00106	-4.65331	-0.69854	-0.79339	PBX3	PBX homeobox 3
204531_s_at	0.0229929	0.00106	-4.65261	-0.6996	-0.671053	BRCA1	BRCA1, DNA repair associated
207233_s_at	0.0230583	0.00107	4.64863	-0.70555	0.516717	MITF	melanogenesis associated transcription factor
201363_s_at	0.0230583	0.00107	-4.64838	-0.70592	-0.53809	IVNS1ABP	influenza virus NS1A binding protein
204990_s_at	0.0231239	0.00107	-4.64511	-0.71081	-0.536623	ITGB4	integrin subunit beta 4
205440_s_at	0.0231447	0.00107	4.64293	-0.71407	1.59963	NPY1R	neuropeptide Y receptor Y1
206689_x_at	0.0231447	0.00108	-4.64185	-0.71569	-0.609213	KAT5	lysine acetyltransferase 5
213577_at	0.0231468	0.00108	-4.64113	-0.71677	-0.531777	SQLE	squalene epoxidase
218542_at	0.0231564	0.00108	-4.64019	-0.71818	-0.746347	CEP55	centrosomal protein 55
205253_at	0.0232436	0.00109	-4.63565	-0.72498	-0.56264	PBX1	PBX homeobox 1
218308_at	0.0235068	0.0011	-4.62535	-0.74041	-0.620203	TACC3	transforming acidic coiled-coil containing protein 3
213874_at	0.023523	0.00111	4.62383	-0.74269	0.500233	SERPINA4	serpin family A member 4
214804_at	0.0236111	0.00111	-4.6203	-0.74799	-1.08501	CENPI	centromere protein I
202464_s_at	0.0236111	0.00111	-4.61864	-0.75048	-1.1417	PFKFB3	6-phosphofructo-2-kinase/fructose-2,6-biphosphatase 3
208729_x_at	0.0236487	0.00112	4.61669	-0.7534	0.59219	HLA-B	major histocompatibility complex, class I, B
201585_s_at	0.023812	0.00113	-4.60802	-0.76641	-0.519713	SFPQ	splicing factor proline and glutamine rich
215016_x_at	0.023812	0.00113	-4.60684	-0.76818	-0.605563	DST	dystonin
218553_s_at	0.023861	0.00114	-4.60431	-0.77198	-0.646277	KCTD15	potassium channel tetramerization domain containing 15
219229_at	0.023861	0.00114	-4.60381	-0.77275	-0.63918	SLCO3A1	solute carrier organic anion transporter family member 3A1
215313_x_at	0.0238981	0.00114	4.60119	-0.77669	0.533463	HLA-A	major histocompatibility complex, class I, A
203907_s_at	0.0240762	0.00115	-4.59416	-0.78725	-0.509833	IQSEC1	IQ motif and Sec7 domain 1
205034_at	0.0241472	0.00116	-4.59094	-0.79208	-0.801633	CCNE2	cyclin E2
201362_at	0.0243301	0.00117	-4.5827	-0.80449	-0.609087	IVNS1ABP	influenza virus NS1A binding protein
201054_at	0.0243301	0.00117	-4.58265	-0.80457	-0.595203	HNRNPA0	heterogeneous nuclear ribonucleoprotein A0
220770_s_at	0.0244149	0.00118	-4.57902	-0.81003	-0.54862	ZBED8	zinc finger BED-type containing 8
219688_at	0.0245257	0.00119	4.57415	-0.81738	0.859323	BBS7	Bardet-Biedl syndrome 7
204641_at	0.0245257	0.00119	-4.57406	-0.8175	-0.67974	NEK2	NIMA related kinase 2
AFFX-M27830_5_at	0.0245516	0.00119	-4.57152	-0.82133	-0.876847
209832_s_at	0.0245776	0.0012	-4.57001	-0.82361	-0.594033	CDT1	chromatin licensing and DNA replication factor 1
203594_at	0.0245776	0.0012	-4.56949	-0.82439	-0.64709	RTCA	RNA 3-terminal phosphate cyclase
213308_at	0.024648	0.0012	-4.5663	-0.82919	-0.760803	SHANK2	SH3 and multiple ankyrin repeat domains 2
204224_s_at	0.024676	0.00121	4.56491	-0.8313	0.883733	GCH1	GTP cyclohydrolase 1
203432_at	0.024717	0.00121	-4.56316	-0.83394	-0.575833	TMPO	thymopoietin
205109_s_at	0.024868	0.00122	-4.55841	-0.8411	-0.65242	LOC101930241///ARHGEF4	rho guanine nucleotide exchange factor 4-like///Rho guanine nucleotide exchange factor 4
219581_at	0.0248793	0.00122	-4.55719	-0.84294	-0.71066	TSEN2	tRNA splicing endonuclease subunit 2
214794_at	0.0250018	0.00123	4.54896	-0.85537	0.599977	PA2G4	proliferation-associated 2G4
210559_s_at	0.0250018	0.00123	-4.54859	-0.85593	-0.621983	CDK1	cyclin dependent kinase 1
201927_s_at	0.0250461	0.00124	-4.54647	-0.85913	-0.685673	PKP4	plakophilin 4
203973_s_at	0.0251153	0.00125	4.5411	-0.86725	0.55137	CEBPD	CCAAT/enhancer binding protein delta
210656_at	0.0251487	0.00125	4.53911	-0.87025	0.721187	EED	embryonic ectoderm development
215812_s_at	0.0255655	0.00128	4.52496	-0.89166	0.76932	SLC6A10PB///SLC6A10P///SLC6A8	solute carrier family 6 member 8 pseudogene///solute carrier family 6 member 10, pseudogene///solute carrier family 6 member 8
212785_s_at	0.0256729	0.00129	-4.52092	-0.89778	-0.555727	LARP7	La ribonucleoprotein domain family member 7
209527_at	0.0256849	0.00129	-4.52	-0.89917	-0.741273	EXOSC2	exosome component 2
207590_s_at	0.0257566	0.00129	-4.51714	-0.9035	-0.7586	CENPI	centromere protein I
209656_s_at	0.0260221	0.00132	4.50339	-0.92434	0.616247	TMEM47	transmembrane protein 47
205282_at	0.0262244	0.00134	-4.49573	-0.93596	-0.954383	LRP8	LDL receptor related protein 8
221566_s_at	0.0262244	0.00134	-4.49371	-0.93903	-0.568987	NOL3	nucleolar protein 3
219560_at	0.0263153	0.00135	4.48873	-0.9466	0.53403	C22orf29///GNB1L	chromosome 22 open reading frame 29///G protein subunit beta 1 like
201718_s_at	0.0264675	0.00136	-4.48194	-0.95691	-0.563797	EPB41L2	erythrocyte membrane protein band 4.1 like 2
218984_at	0.0265508	0.00137	-4.47752	-0.96363	-0.586297	PUS7	pseudouridylate synthase 7 (putative)
209902_at	0.0265508	0.00137	-4.47675	-0.9648	-0.539883	ATR	ATR serine/threonine kinase
220212_s_at	0.026564	0.00138	-4.47537	-0.9669	-0.70561	THADA	THADA, armadillo repeat containing
205543_at	0.026679	0.00138	4.4713	-0.97309	1.20743	HSPA4L	heat shock protein family A (Hsp70) member 4 like
200965_s_at	0.0268238	0.0014	-4.46593	-0.98127	-0.754767	ABLIM1	actin binding LIM protein 1
204623_at	0.0271123	0.00142	4.45585	-0.99661	0.62259	TFF3	trefoil factor 3
202838_at	0.0271187	0.00142	4.45431	-0.99896	0.507843	FUCA1	fucosidase, alpha-L- 1, tissue
218384_at	0.0271187	0.00142	-4.45357	-1.00008	-0.516493	CARHSP1	calcium regulated heat stable protein 1
219152_at	0.027168	0.00143	-4.45142	-1.00336	-0.529647	PODXL2	podocalyxin like 2
202976_s_at	0.027168	0.00143	-4.45103	-1.00396	-0.65635	RHOBTB3	Rho related BTB domain containing 3
201951_at	0.0273495	0.00144	-4.44428	-1.01426	-0.725147	ALCAM	activated leukocyte cell adhesion molecule
202206_at	0.0274215	0.00145	4.44189	-1.0179	0.625633	ARL4C	ADP ribosylation factor like GTPase 4C
221625_at	0.0274215	0.00145	4.44137	-1.01869	0.54166	ZNF506	zinc finger protein 506
202875_s_at	0.0275703	0.00146	-4.43505	-1.02833	-0.599643	PBX2	PBX homeobox 2
211810_s_at	0.0275783	0.00147	4.43309	-1.03133	0.688717	GALC	galactosylceramidase
212819_at	0.0275783	0.00147	4.43293	-1.03157	0.732737	ASB1	ankyrin repeat and SOCS box containing 1
203214_x_at	0.0275783	0.00147	-4.43245	-1.03231	-0.609373	CDK1	cyclin dependent kinase 1
204384_at	0.0278903	0.0015	-4.41878	-1.05318	-0.677593	GOLGA2	golgin A2
219787_s_at	0.0279649	0.0015	-4.4164	-1.05683	-0.62603	ECT2	epithelial cell transforming 2
209674_at	0.0280756	0.00151	4.41208	-1.06343	0.725147	CRY1	cryptochrome circadian clock 1
201739_at	0.0281169	0.00152	4.40999	-1.06663	0.54502	SGK1	serum/glucocorticoid regulated kinase 1
56256_at	0.0281669	0.00152	4.40714	-1.071	0.526367	SIDT2	SID1 transmembrane family member 2
210263_at	0.0283354	0.00154	4.40205	-1.07879	0.602793	KCNF1	potassium voltage-gated channel modifier subfamily F member 1
212675_s_at	0.0283733	0.00154	4.39895	-1.08354	0.584347	CEP68	centrosomal protein 68
211919_s_at	0.0284743	0.00155	4.3941	-1.09096	0.64434	CXCR4	C-X-C motif chemokine receptor 4
212347_x_at	0.0287569	0.00157	4.38505	-1.10483	0.55101	MIR4800///MXD4	microRNA 4800///MAX dimerization protein 4
215128_at	0.0288122	0.00158	4.38159	-1.11014	0.70039
209119_x_at	0.0288458	0.00159	-4.38027	-1.11216	-0.634773	NR2F2	nuclear receptor subfamily 2 group F member 2
207847_s_at	0.0290391	0.0016	-4.37311	-1.12315	-0.507767	MUC1	mucin 1, cell surface associated
209026_x_at	0.0291239	0.00161	-4.37009	-1.12779	-0.626447	TUBB	tubulin beta class I
205613_at	0.0291378	0.00161	4.36869	-1.12994	0.50039	SYT17	synaptotagmin 17
203192_at	0.0291875	0.00162	4.36648	-1.13333	0.817837	ABCB6	ATP binding cassette subfamily B member 6 (Langereis blood group)
203630_s_at	0.0292051	0.00162	-4.36554	-1.13477	-0.50995	COG5	component of oligomeric golgi complex 5
206108_s_at	0.0292554	0.00163	-4.36062	-1.14234	-0.848973	SRSF6	serine and arginine rich splicing factor 6
202181_at	0.0292554	0.00164	4.3589	-1.14497	0.58327	SUSD6	sushi domain containing 6
210672_s_at	0.0292554	0.00164	-4.35851	-1.14558	-0.510373	NPRL3	NPR3 like, GATOR1 complex subunit
207060_at	0.0293244	0.00165	4.35558	-1.15008	0.76695	EN2	engrailed homeobox 2
219212_at	0.0294827	0.00166	-4.35124	-1.15676	-0.522407	HSPA14	heat shock protein family A (Hsp70) member 14
213005_s_at	0.0298634	0.00168	-4.34219	-1.17068	-0.567977	KANK1	KN motif and ankyrin repeat domains 1
220334_at	0.0300371	0.00169	-4.33677	-1.17902	-0.53193	RGS17	regulator of G-protein signaling 17
212481_s_at	0.0300557	0.0017	-4.33494	-1.18184	-0.573667	TPM4	tropomyosin 4
210220_at	0.0300557	0.0017	-4.33476	-1.18212	-1.0463	FZD2	frizzled class receptor 2
206280_at	0.0302346	0.00172	-4.3282	-1.19223	-0.573777	CDH18	cadherin 18
204075_s_at	0.0303894	0.00173	4.32429	-1.19826	0.568637	CEP104	centrosomal protein 104
218756_s_at	0.0304442	0.00173	4.32257	-1.20091	0.700073	DHRS11	dehydrogenase/reductase 11
201584_s_at	0.0304455	0.00173	-4.32142	-1.20267	-0.698897	DDX39A	DEAD-box helicase 39A
218069_at	0.0304455	0.00173	-4.32097	-1.20337	-0.511997	DCTPP1	dCTP pyrophosphatase 1
219201_s_at	0.0304455	0.00173	-4.32071	-1.20377	-0.643603	TWSG1	twisted gastrulation BMP signaling modulator 1
210821_x_at	0.0306345	0.00175	-4.31479	-1.2129	-0.530253	CENPA	centromere protein A
206245_s_at	0.0310885	0.00179	-4.30157	-1.23332	-0.547003	IVNS1ABP	influenza virus NS1A binding protein
219978_s_at	0.0310885	0.00179	-4.30143	-1.23353	-0.602933	NUSAP1	nucleolar and spindle associated protein 1
201814_at	0.0312008	0.0018	-4.29647	-1.2412	-0.598683	TBC1D5	TBC1 domain family member 5
209406_at	0.0313492	0.00181	-4.29121	-1.24932	-0.55003	BAG2	BCL2 associated athanogene 2
205565_s_at	0.0313492	0.00181	-4.29111	-1.24948	-0.508647	FXN	frataxin
33323_r_at	0.0314516	0.00182	4.2873	-1.25538	1.01792	SFN	stratifin
204264_at	0.0315004	0.00183	4.28503	-1.25888	0.654083	CPT2	carnitine palmitoyltransferase 2
222164_at	0.0315369	0.00183	4.28376	-1.26085	0.51693	FGFR1	fibroblast growth factor receptor 1
219470_x_at	0.0316936	0.00185	4.27998	-1.2667	0.665117	CCNJ	cyclin J
36711_at	0.0317405	0.00185	4.27799	-1.26978	0.806287	MAFF	MAF bZIP transcription factor F
211998_at	0.0317525	0.00185	4.27723	-1.27096	0.526647	MIR4738///H3F3B///H3F3A	microRNA 4738///H3 histone, family 3B///H3 histone, family 3A
203906_at	0.0321646	0.00189	-4.26468	-1.29039	-0.57355	IQSEC1	IQ motif and Sec7 domain 1
209762_x_at	0.0321715	0.00189	-4.26325	-1.2926	-0.834353	SP110	SP110 nuclear body protein
212460_at	0.0321715	0.00189	4.26251	-1.29375	0.685633	SPTSSA	serine palmitoyltransferase small subunit A
212543_at	0.0321715	0.0019	-4.26102	-1.29606	-0.664713	AIM1	absent in melanoma 1
201834_at	0.0323923	0.00192	4.25452	-1.30615	0.685943	PRKAB1	protein kinase AMP-activated non-catalytic subunit beta 1
213657_s_at	0.032803	0.00195	4.24374	-1.32288	0.549223
213882_at	0.0335513	0.00201	4.22334	-1.35457	0.607493	TM2D1	TM2 domain containing 1
207733_x_at	0.0337248	0.00202	4.21911	-1.36115	0.659133	PSG9	pregnancy specific beta-1-glycoprotein 9
220761_s_at	0.0339266	0.00204	-4.21299	-1.37068	-0.58244	TAOK3	TAO kinase 3
211725_s_at	0.034014	0.00206	-4.20911	-1.37671	-0.51072	BID	BH3 interacting domain death agonist
218627_at	0.0341198	0.00207	4.203	-1.38624	0.8434	DRAM1	DNA damage regulated autophagy modulator 1
218820_at	0.0341198	0.00208	4.20222	-1.38744	0.532513	C14orf132	chromosome 14 open reading frame 132
209714_s_at	0.0343829	0.0021	-4.19478	-1.39904	-0.730993	CDKN3	cyclin dependent kinase inhibitor 3
207357_s_at	0.0345546	0.00212	-4.1896	-1.40712	-0.68764	GALNT10	polypeptide N-acetylgalactosaminyltransferase 10
202705_at	0.0348086	0.00214	-4.1814	-1.41992	-0.8057	CCNB2	cyclin B2
217420_s_at	0.0348086	0.00215	4.18098	-1.42056	0.737013	POLR2A	RNA polymerase II subunit A
209836_x_at	0.0349099	0.00216	-4.17801	-1.4252	-0.51511	BOLA2B///BOLA2	bolA family member 2B///bolA family member 2
216048_s_at	0.0349099	0.00216	-4.17766	-1.42575	-0.560483	RHOBTB3	Rho related BTB domain containing 3
209488_s_at	0.0349444	0.00216	-4.17606	-1.42824	-0.533483	RBPMS	RNA binding protein with multiple splicing
217640_x_at	0.0349892	0.00217	-4.17475	-1.43029	-0.633967	SKA1	spindle and kinetochore associated complex subunit 1
212944_at	0.0349892	0.00217	4.17353	-1.4322	0.637723	SLC5A3	solute carrier family 5 member 3
221399_at	0.0350464	0.00218	4.17006	-1.43762	0.57505	EDA2R	ectodysplasin A2 receptor
209172_s_at	0.0350464	0.00218	-4.16997	-1.43776	-0.69616	CENPF	centromere protein F
206440_at	0.0355288	0.00222	-4.15816	-1.45622	-0.60287	LIN7A	lin-7 homolog A, crumbs cell polarity complex component
204284_at	0.0355369	0.00223	-4.15661	-1.45864	-1.06342	PPP1R3C	protein phosphatase 1 regulatory subunit 3C
214912_at	0.0359353	0.00226	4.147	-1.47367	0.798473
203690_at	0.0359359	0.00226	-4.14653	-1.47442	-0.527973	TUBGCP3	tubulin gamma complex associated protein 3
219922_s_at	0.0361779	0.00229	-4.13907	-1.48609	-0.562647	LTBP3	latent transforming growth factor beta binding protein 3
214791_at	0.0361779	0.00229	-4.13891	-1.48634	-0.527923	SP140L	SP140 nuclear body protein like
213562_s_at	0.0361812	0.00229	-4.13839	-1.48716	-0.538807	SQLE	squalene epoxidase
212148_at	0.0364444	0.00231	-4.13182	-1.49745	-0.682273	PBX1	PBX homeobox 1
213918_s_at	0.0365841	0.00233	-4.12795	-1.50351	-0.553293	NIPBL	NIPBL, cohesin loading factor
202741_at	0.0365904	0.00233	-4.12738	-1.50441	-0.58216	PRKACB	protein kinase cAMP-activated catalytic subunit beta
205493_s_at	0.0366709	0.00234	4.12507	-1.50802	1.21215	DPYSL4	dihydropyrimidinase like 4
209185_s_at	0.0369296	0.00236	4.11748	-1.51993	0.798753	IRS2	insulin receptor substrate 2
205696_s_at	0.0369339	0.00238	-4.11429	-1.52494	-0.518887	GFRA1	GDNF family receptor alpha 1
204286_s_at	0.0369339	0.00238	4.11417	-1.52512	1.25667	PMAIP1	phorbol-12-myristate-13-acetate-induced protein 1
213478_at	0.0372008	0.0024	-4.10842	-1.53415	-0.678703	KAZN	kazrin, periplakin interacting protein
206794_at	0.0374212	0.00243	-4.09962	-1.54796	-0.51109	ERBB4	erb-b2 receptor tyrosine kinase 4
208829_at	0.0375527	0.00245	4.09519	-1.55493	0.503453	TAPBP	TAP binding protein (tapasin)
203999_at	0.0376221	0.00245	-4.09346	-1.55764	-0.526553	SYT1	synaptotagmin 1
31845_at	0.0378379	0.00247	-4.08842	-1.56558	-0.641757	ELF4	E74 like ETS transcription factor 4
211829_s_at	0.0378427	0.00248	-4.08724	-1.56743	-1.11742	GPER1	G protein-coupled estrogen receptor 1
208783_s_at	0.0380174	0.0025	4.08179	-1.57599	0.501943	CD46	CD46 molecule
204240_s_at	0.0382647	0.00252	-4.07652	-1.5843	-0.578563	SMC2	structural maintenance of chromosomes 2
212037_at	0.0382647	0.00252	-4.07627	-1.58469	-0.571483	PNN	pinin, desmosome associated protein
206357_at	0.0384616	0.00255	-4.06854	-1.59685	-0.50014	OPA3	optic atrophy 3 (autosomal recessive, with chorea and spastic paraplegia)
208767_s_at	0.0385252	0.00256	4.0666	-1.59992	0.51017	LAPTM4B	lysosomal protein transmembrane 4 beta
203373_at	0.0388012	0.00258	-4.0611	-1.60858	-1.03946	SOCS2	suppressor of cytokine signaling 2
212281_s_at	0.0388743	0.00259	-4.05945	-1.61118	-0.514197	TMEM97	transmembrane protein 97
203124_s_at	0.0391394	0.00261	4.0528	-1.62166	0.697533	SLC11A2	solute carrier family 11 member 2
33322_i_at	0.0391571	0.00262	4.05128	-1.62406	0.844763	SFN	stratifin
203006_at	0.0392078	0.00263	-4.04955	-1.62679	-0.579477	INPP5A	inositol polyphosphate-5-phosphatase A
212463_at	0.0392078	0.00263	4.04828	-1.6288	0.52657	CD59	CD59 molecule
221865_at	0.0392303	0.00264	-4.04704	-1.63074	-0.59395	TMEM268	transmembrane protein 268
221020_s_at	0.0392989	0.00265	-4.04324	-1.63675	-0.57581	SLC25A32	solute carrier family 25 member 32
202588_at	0.0392989	0.00266	4.04211	-1.63853	0.567783	AK1	adenylate kinase 1
213593_s_at	0.0392989	0.00266	4.04195	-1.63879	0.51908	TRA2A	transformer 2 alpha homolog
218129_s_at	0.0392989	0.00266	4.04087	-1.64048	0.635427	NFYB	nuclear transcription factor Y subunit beta
207165_at	0.0392989	0.00266	-4.04076	-1.64066	-0.982613	HMMR	hyaluronan mediated motility receptor
208804_s_at	0.0395085	0.00269	-4.03519	-1.64946	-0.628933	SRSF6	serine and arginine rich splicing factor 6
213452_at	0.0395193	0.00269	-4.03416	-1.65108	-0.803343	ZNF184	zinc finger protein 184
220911_s_at	0.0395637	0.00269	4.03301	-1.6529	0.515833	NYNRIN	NYN domain and retroviral integrase containing
215509_s_at	0.0395765	0.0027	-4.03203	-1.65443	-0.72986	BUB1	BUB1 mitotic checkpoint serine/threonine kinase
214157_at	0.0395765	0.0027	4.03073	-1.65649	0.50019	GNAS	GNAS complex locus
206925_at	0.0396874	0.00271	-4.02844	-1.66011	-0.561297	ST8SIA4	ST8 alpha-N-acetyl-neuraminide alpha-2,8-sialyltransferase 4
201564_s_at	0.039696	0.00272	4.02746	-1.66166	0.84484	FSCN1	fascin actin-bundling protein 1
210483_at	0.0397381	0.00273	4.02559	-1.66462	0.554593	LOC254896///TNFRSF10C	uncharacterized LOC254896///TNF receptor superfamily member 10c
209825_s_at	0.039866	0.00275	-4.02049	-1.67268	-0.540603	MIR3658///UCK2	microRNA 3658///uridine-cytidine kinase 2
204735_at	0.0400143	0.00277	4.016	-1.67978	0.7113	PDE4A	phosphodiesterase 4A
203803_at	0.0402636	0.0028	4.00804	-1.69237	0.707973	PCYOX1	prenylcysteine oxidase 1
220488_s_at	0.0402869	0.00281	-4.00662	-1.69461	-0.50896	BCAS3	BCAS3, microtubule associated cell migration factor
216870_x_at	0.0403352	0.00282	-4.00398	-1.69879	-0.529337	DLEU2	deleted in lymphocytic leukemia 2 (non-protein coding)
202606_s_at	0.0408533	0.00287	-3.99227	-1.71733	-0.65516	TLK1	tousled like kinase 1
213149_at	0.0410332	0.00289	-3.98821	-1.72376	-0.506987	DLAT	dihydrolipoamide S-acetyltransferase
208754_s_at	0.0411166	0.0029	3.9865	-1.72648	0.64587	NAP1L1	nucleosome assembly protein 1 like 1
212830_at	0.0411882	0.00291	-3.98333	-1.73149	-0.537887	MEGF9	multiple EGF like domains 9
216607_s_at	0.0412662	0.00292	-3.98171	-1.73407	-0.622967	LRRD1///CYP51A1	leucine rich repeats and death domain containing 1///cytochrome P450 family 51 subfamily A member 1
212277_at	0.0413261	0.00292	-3.98033	-1.73625	-0.500077	MTMR4	myotubularin related protein 4
214718_at	0.0414285	0.00295	3.97512	-1.74452	0.505863	GATAD1	GATA zinc finger domain containing 1
205862_at	0.0416922	0.00297	3.96984	-1.7529	1.36079	GREB1	growth regulation by estrogen in breast cancer 1
201952_at	0.042027	0.00301	-3.96267	-1.76428	-0.78556	ALCAM	activated leukocyte cell adhesion molecule
203849_s_at	0.042027	0.00301	-3.96233	-1.76481	-0.668143	KIF1A	kinesin family member 1A
221959_at	0.042027	0.00301	-3.96213	-1.76514	-0.69353	FAM110B	family with sequence similarity 110 member B
202599_s_at	0.0424403	0.00305	-3.95315	-1.7794	-0.58213	NRIP1	nuclear receptor interacting protein 1
221601_s_at	0.0425748	0.00307	3.94957	-1.78509	0.570087	FCMR	Fc fragment of IgM receptor
205598_at	0.0426835	0.00308	-3.94742	-1.78851	-0.60896	TRAIP	TRAF interacting protein
57588_at	0.0427988	0.00311	-3.94144	-1.79802	-0.889687	SLC24A3	solute carrier family 24 member 3
203362_s_at	0.0428512	0.00312	-3.93947	-1.80115	-0.691227	MAD2L1	MAD2 mitotic arrest deficient-like 1 (yeast)
215635_at	0.043174	0.00316	3.93022	-1.81586	0.574033
201995_at	0.044385	0.00329	-3.90448	-1.85687	-0.56007	EXT1	exostosin glycosyltransferase 1
202253_s_at	0.0444876	0.0033	-3.90223	-1.86045	-0.501297	DNM2	dynamin 2
212398_at	0.0445038	0.00331	-3.90131	-1.86192	-0.52083	RDX	radixin
213051_at	0.0446229	0.00332	3.89873	-1.86604	0.657457	ZC3HAV1	zinc finger CCCH-type containing, antiviral 1
204105_s_at	0.0446492	0.00333	-3.89761	-1.86782	-0.969937	NRCAM	neuronal cell adhesion molecule
208078_s_at	0.0447069	0.00333	3.8964	-1.86975	0.510517	SIK1	salt inducible kinase 1
213390_at	0.044782	0.00334	-3.89494	-1.87207	-0.517367	ZC3H4	zinc finger CCCH-type containing 4
204420_at	0.0448141	0.00335	3.89381	-1.87389	1.26365	FOSL1	FOS like 1, AP-1 transcription factor subunit
206081_at	0.0450371	0.00337	-3.88917	-1.88129	-0.53671	SLC24A1	solute carrier family 24 member 1
203887_s_at	0.0451624	0.0034	3.88344	-1.89043	1.32458	THBD	thrombomodulin
218729_at	0.0452297	0.00341	-3.88212	-1.89255	-1.24107	LXN	latexin
210640_s_at	0.0459053	0.0035	-3.86618	-1.91802	-0.80073	GPER1	G protein-coupled estrogen receptor 1
202935_s_at	0.0461776	0.00353	3.85988	-1.92809	0.81314	SOX9	SRY-box 9
215501_s_at	0.0469098	0.0036	3.8469	-1.94886	0.539027	DUSP10	dual specificity phosphatase 10
209692_at	0.0471063	0.00363	-3.84128	-1.95786	-0.532033	EYA2	EYA transcriptional coactivator and phosphatase 2
201014_s_at	0.0477831	0.00371	-3.82759	-1.97978	-0.51176	PAICS	phosphoribosylaminoimidazole carboxylase; phosphoribosylaminoimidazolesuccinocarboxamide synthase
203431_s_at	0.0477831	0.00372	-3.82704	-1.98068	-0.706507	ARHGAP32	Rho GTPase activating protein 32
207018_s_at	0.0477831	0.00372	-3.82692	-1.98086	-1.03899	RAB27B	RAB27B, member RAS oncogene family
204341_at	0.0477831	0.00372	-3.82671	-1.9812	-0.571657	TRIM16	tripartite motif containing 16
209368_at	0.0485691	0.00382	3.81049	-2.00721	0.596803	EPHX2	epoxide hydrolase 2
203927_at	0.0485691	0.00382	3.81011	-2.00783	0.600147	NFKBIE	NFKB inhibitor epsilon
209260_at	0.0485691	0.00382	3.80949	-2.00883	0.90412	SFN	stratifin
203245_s_at	0.0486715	0.00384	-3.80668	-2.01332	-0.590267	LINC00094	long intergenic non-protein coding RNA 94
214039_s_at	0.0486715	0.00384	3.80632	-2.0139	0.512703	LAPTM4B	lysosomal protein transmembrane 4 beta
219090_at	0.0490891	0.00389	-3.79787	-2.02748	-0.969053	SLC24A3	solute carrier family 24 member 3
203145_at	0.0490891	0.0039	-3.7961	-2.03032	-0.634483	SPAG5	sperm associated antigen 5
204061_at	0.0490891	0.0039	3.79589	-2.03065	0.61507	PRKX	protein kinase, X-linked
200899_s_at	0.0495251	0.00397	3.7856	-2.04719	0.525353	MGEA5	meningioma expressed antigen 5 (hyaluronidase)
217678_at	0.0495827	0.00398	-3.78388	-2.04995	-0.690983	SLC7A11	solute carrier family 7 member 11
212093_s_at	0.0499873	0.00402	-3.77698	-2.06105	-0.653467	MTUS1	microtubule associated tumor suppressor 1

## Sheet: Table S3.CARMAweb_GSE39870_all
Supplementary Table S3. List of all DEGs detected by CARMAweb using GSE39870 dataset
Legend: probeset, the ID of the probe for GPL571 ([HG-U133A_2] Affymetrix Human Genome U133A 2.0 Array); rawp, the p-value obtained from the moderated t-statistic; BH, the p-value after the application of Bonferroni& Hochberg FDR adjustment method for multiple testing; meanM, the average log-ratios of the expression levels; meanA, the average expression levels of a gene
probeset_id	rawp	BH	meanM	meanA
200037_s_at	7.45e-05	0.00514438	-0.720528	11.4093
200073_s_at	6.06e-07	0.000481966	-1.44176	9.58864
200603_at	0.00041081	0.0134469	0.504879	11.6249
200617_at	0.000588667	0.016516	0.564638	10.5246
200621_at	0.000306133	0.0114233	-0.764947	10.9799
200671_s_at	2.85e-07	0.000378183	-1.01234	7.62815
200672_x_at	4.21e-05	0.00378926	-0.670787	9.35644
200687_s_at	7.77e-05	0.00529114	-0.562057	9.96529
200730_s_at	3.75e-06	0.001158	1.04245	10.2916
200731_s_at	6.68e-07	0.000496323	1.13307	9.1508
200732_s_at	3e-06	0.000988761	1.05105	9.57792
200733_s_at	1.85e-05	0.00246695	0.929991	9.68353
200749_at	8.51e-05	0.00555939	-0.552376	8.78822
200753_x_at	2e-05	0.00257974	-0.766398	10.0053
200754_x_at	0.000219491	0.00947072	-0.760817	11.9722
200771_at	8.29e-06	0.00172007	0.777243	8.98427
200790_at	3.19e-05	0.00330505	0.625322	11.0887
200892_s_at	1.14e-05	0.00200752	-0.752046	10.1602
200893_at	1.46e-05	0.00216642	-0.730855	10.6497
200897_s_at	0.000188543	0.00874992	-0.602175	8.8115
200899_s_at	0.00396811	0.0495247	0.525361	9.71911
200904_at	0.000143408	0.00737807	0.834611	8.93919
200907_s_at	7.16e-05	0.00503466	-0.765607	9.20536
200934_at	0.000891575	0.020907	-0.648733	10.9076
200965_s_at	0.00139534	0.0268197	-0.754766	7.50579
200974_at	2.11e-07	0.000312681	1.23362	8.44267
200993_at	0.000130341	0.00709928	0.567692	9.45129
200994_at	0.000512721	0.0152903	0.62231	9.04252
201014_s_at	0.00371353	0.0477665	-0.511726	9.20396
201020_at	6.54e-05	0.00477632	-0.636137	9.95448
201041_s_at	0.000218221	0.00943943	0.648066	8.62709
201054_at	0.0011738	0.0243283	-0.595207	9.66381
201060_x_at	1.17e-06	0.000618581	1.27309	10.6178
201061_s_at	1.17e-05	0.00201691	1.35957	10.7553
201117_s_at	0.000657179	0.0175329	0.540377	6.36932
201129_at	9.46e-05	0.00583938	-0.557446	8.45969
201182_s_at	0.000535157	0.0157486	-0.510388	9.24709
201183_s_at	0.000303026	0.0113454	-0.511084	9.88256
201195_s_at	0.000380619	0.0128666	1.63021	10.576
201196_s_at	0.000795023	0.0194623	-0.587019	8.87436
201202_at	0.000388315	0.0130087	0.655562	10.8576
201235_s_at	1.09e-05	0.0019996	1.15635	8.53835
201236_s_at	4.1e-07	0.000392314	1.5909	10.3963
201286_at	0.000456901	0.0142355	0.562498	9.45505
201294_s_at	1e-05	0.00190561	0.964837	8.53087
201295_s_at	9.62e-07	0.000578784	1.00873	7.35023
201296_s_at	3.49e-05	0.00345684	0.95277	10.0677
201300_s_at	0.000134922	0.00726003	0.920358	8.06175
201301_s_at	1.42e-05	0.00215969	0.895754	9.70716
201302_at	3.14e-06	0.00101363	0.946707	9.64021
201313_at	0.000673109	0.017739	-0.52203	8.02734
201361_at	0.000116938	0.00669596	-0.676363	9.92885
201362_at	0.00117384	0.0243283	-0.609083	8.12835
201363_s_at	0.00106784	0.0230729	-0.538098	8.57393
201370_s_at	0.000611851	0.0168067	-0.56545	6.40607
201385_at	0.000368294	0.0126417	-0.618148	10.893
201386_s_at	0.00015365	0.00774402	-0.741188	10.2064
201443_s_at	0.000336063	0.011991	0.561772	10.8109
201478_s_at	2e-05	0.00257974	-0.750941	9.99945
201479_at	4.65e-05	0.00396824	-0.659575	10.4818
201555_at	7.3e-06	0.00161848	-0.948729	10.8444
201564_s_at	0.00271707	0.0396907	0.844838	7.4946
201578_at	0.000652319	0.0174536	0.534027	9.00108
201579_at	4.51e-05	0.00387978	0.795953	7.98981
201584_s_at	0.00173224	0.0304687	-0.698946	10.5089
201585_s_at	0.00113171	0.0238101	-0.519658	9.49743
201586_s_at	6.87e-05	0.00493997	-0.71495	10.5637
201631_s_at	0.000489923	0.0147487	0.583454	10.3825
201663_s_at	0.000226347	0.00958619	-0.731938	9.8175
201664_at	2.14e-05	0.00268388	-0.785843	9.9551
201690_s_at	0.000243725	0.0100117	-0.603564	10.1365
201697_s_at	3.48e-05	0.00345684	-0.601949	9.69708
201702_s_at	0.000308819	0.0114606	-0.735635	8.40564
201703_s_at	2.33e-05	0.00281055	-0.733352	9.28286
201718_s_at	0.00136258	0.0264674	-0.563795	7.86136
201719_s_at	0.000665247	0.0176846	-0.577399	8.19552
201739_at	0.00151745	0.0281233	0.545009	8.11491
201742_x_at	6.45e-05	0.00477632	-0.686464	11.2393
201755_at	0.000239875	0.00993253	-0.769085	8.76843
201773_at	0.000284371	0.0109412	-0.639204	10.2864
201801_s_at	0.000225696	0.00957682	-0.779797	8.42303
201802_at	0.000361733	0.0124882	-0.667318	9.01082
201814_at	0.0017996	0.0311982	-0.598681	9.06287
201834_at	0.00191884	0.0324079	0.685847	8.75468
201835_s_at	0.000225569	0.00957682	0.806591	8.83793
201867_s_at	8.03e-05	0.00538422	-0.842022	8.25724
201891_s_at	0.000259609	0.0103089	0.855601	11.5505
201896_s_at	1.71e-05	0.00241228	-0.967389	8.73179
201927_s_at	0.00123827	0.0250545	-0.685674	8.56438
201930_at	1.09e-06	0.000608791	-1.11701	10.3708
201937_s_at	0.000324627	0.0118643	-0.513297	9.3319
201951_at	0.00144077	0.0273446	-0.725158	9.96843
201952_at	0.00300354	0.0420267	-0.785551	10.5139
201972_at	0.00032074	0.0117712	0.586568	10.7353
201993_x_at	1.18e-05	0.00201691	-1.07715	9.52986
201995_at	0.00329135	0.0443833	-0.560067	7.25489
202017_at	4.15e-06	0.00119984	0.891216	10.3139
202094_at	0.000217972	0.00943943	-0.602598	8.37738
202095_s_at	8.47e-05	0.00555085	-0.75813	8.98636
202107_s_at	8.68e-07	0.000552513	-0.934554	10.704
202111_at	0.000504132	0.0150948	-0.521187	9.39115
202153_s_at	2.2e-05	0.00269176	-0.700905	9.52079
202177_at	0.000949874	0.0217972	0.521353	6.58673
202181_at	0.00163713	0.029252	0.583303	9.06511
202183_s_at	5.83e-05	0.00456947	-0.599274	9.26777
202193_at	0.000141478	0.00737634	0.854598	7.87105
202206_at	0.00144635	0.0274206	0.625631	6.76088
202211_at	5.89e-05	0.00456979	0.629836	7.14147
202219_at	0.000202653	0.00908351	1.27778	9.33773
202240_at	1.5e-07	0.000238009	-1.58903	8.48189
202246_s_at	0.000206717	0.00917339	-0.583399	11.3281
202251_at	0.000248409	0.0101144	-0.641051	9.18086
202253_s_at	0.00329834	0.0444239	-0.501334	8.77224
202262_x_at	0.000548264	0.0159032	-0.561976	9.39022
202271_at	0.00067285	0.017739	0.523689	7.85891
202284_s_at	2.06e-05	0.00263118	1.49559	11.6872
202293_at	0.000422471	0.0136044	-0.681021	7.96681
202307_s_at	4.09e-06	0.00119984	1.63364	7.92973
202326_at	4.25e-05	0.00378926	-0.618813	8.34651
202330_s_at	5.89e-06	0.00146673	-0.932197	9.16191
202393_s_at	1.15e-06	0.000618581	1.33377	9.8385
202425_x_at	0.000233583	0.00978057	-0.560987	10.3605
202431_s_at	0.00030919	0.0114606	-0.658755	9.2383
202432_at	3.22e-05	0.00331704	0.678426	9.50411
202450_s_at	0.000207457	0.0091879	0.560897	8.06443
202457_s_at	0.000335104	0.011991	-0.583964	10.268
202464_s_at	0.00111345	0.0236353	-1.1417	7.10284
202484_s_at	4.21e-05	0.00378926	-0.630082	8.53403
202531_at	0.000716009	0.0182292	0.662063	8.13214
202588_at	0.00265573	0.0392972	0.567801	7.73296
202589_at	0.000377572	0.0128208	0.522385	11.778
202599_s_at	0.00305159	0.0424414	-0.582136	10.0868
202606_s_at	0.00286876	0.0408354	-0.655176	8.04426
202625_at	0.000709476	0.0181253	-0.954739	6.51035
202626_s_at	0.000200455	0.0090213	-1.04719	8.01319
202633_at	0.000267939	0.010531	-0.541729	8.6892
202650_s_at	0.000196542	0.00899794	0.540476	8.78414
202659_at	0.000125088	0.00689749	0.517176	7.87321
202671_s_at	0.000354336	0.0123336	-0.611768	10.4399
202672_s_at	3.04e-05	0.00322055	1.14897	7.87423
202691_at	8.84e-05	0.0056571	-0.517906	7.7295
202693_s_at	0.00010893	0.00641966	0.696142	7.73966
202705_at	0.00214292	0.0347943	-0.805699	8.93532
202722_s_at	6.43e-05	0.00477632	-0.605183	8.51711
202725_at	0.000351903	0.0122681	0.548113	9.45009
202741_at	0.00232884	0.0365864	-0.582159	7.88765
202779_s_at	3.12e-05	0.00329501	-0.912239	11.0152
202794_at	0.00011324	0.00653536	1.11971	7.45372
202806_at	0.000219876	0.00947072	-0.964273	8.28567
202838_at	0.00141971	0.027118	0.507837	9.40416
202848_s_at	0.000131201	0.00712868	-0.589638	8.92334
202870_s_at	0.000167137	0.00816517	-1.28192	8.81205
202875_s_at	0.00146108	0.0275684	-0.599646	7.69576
202899_s_at	6.48e-08	0.000167455	-1.25934	11.0743
202903_at	4.62e-05	0.00395498	-0.730569	6.07566
202905_x_at	0.000166444	0.00816517	-0.752548	10.1344
202906_s_at	0.00102132	0.0226388	-0.714796	9.02695
202907_s_at	0.00016933	0.00823615	-0.921913	10.0122
202911_at	0.000153327	0.00774402	-0.693651	9.60851
202935_s_at	0.0035298	0.0461734	0.813137	6.56455
202945_at	0.000894451	0.0209524	-0.5151	9.16875
202948_at	0.000952844	0.0217972	-1.38634	6.0768
202954_at	0.000294788	0.0111525	-0.844627	10.3394
202976_s_at	0.00142762	0.0271821	-0.656326	10.6287
202982_s_at	3.19e-05	0.00330505	0.659773	8.45449
202983_at	0.000651973	0.0174536	-0.749792	9.05209
203006_at	0.00262568	0.0392039	-0.579478	9.16326
203035_s_at	0.000297158	0.01122	-0.522087	9.03588
203062_s_at	5.79e-06	0.00146559	-0.786231	7.49511
203123_s_at	0.000308572	0.0114606	0.597864	8.99437
203124_s_at	0.00261075	0.0391109	0.697612	8.62137
203145_at	0.00390065	0.0490843	-0.634512	8.07546
203158_s_at	0.000198808	0.00899794	0.918714	6.04724
203159_at	7.45e-05	0.00514438	0.75762	8.3717
203192_at	0.00161834	0.0291682	0.81792	8.65466
203201_at	0.000464122	0.0143612	-0.718508	8.44163
203214_x_at	0.00146729	0.0275838	-0.609361	9.20424
203245_s_at	0.00383608	0.0486787	-0.590277	7.75124
203270_at	0.000221593	0.0095114	-0.615743	8.76172
203276_at	1.73e-05	0.00241228	-1.22998	10.0457
203282_at	8.73e-05	0.00562045	0.674288	9.03406
203284_s_at	0.00029487	0.0111525	-0.601345	7.82036
203287_at	3.56e-05	0.00349286	-0.735981	9.09831
203303_at	0.000958522	0.0218781	0.594328	10.1968
203335_at	3.13e-07	0.000378183	1.41985	8.23831
203340_s_at	0.000921036	0.0213062	-0.690262	7.21545
203343_at	7.86e-05	0.00533942	-0.575628	11.7975
203344_s_at	0.000395828	0.0132004	-0.507875	8.75029
203362_s_at	0.003115	0.0428352	-0.691248	8.89886
203372_s_at	0.000426124	0.0136783	-0.897206	7.41177
203373_at	0.00257922	0.0387963	-1.03946	7.54933
203405_at	2.48e-05	0.00288732	-0.677666	8.46887
203409_at	2.61e-08	8.3e-05	1.42736	10.3957
203418_at	9.37e-05	0.00580951	-1.07352	8.58088
203420_at	2.83e-05	0.00310556	0.68379	8.89232
203431_s_at	0.00371685	0.0477665	-0.706509	8.0626
203432_at	0.00120823	0.024716	-0.575833	9.51478
203455_s_at	8.22e-06	0.00172007	1.01057	9.96012
203499_at	0.00014008	0.00737634	1.12916	8.37205
203503_s_at	0.000474462	0.0145326	-0.592298	7.0762
203542_s_at	0.000475511	0.0145326	0.808461	7.59941
203543_s_at	0.000122947	0.00688161	0.897802	4.9181
203565_s_at	0.000263771	0.0104185	-0.625219	8.46686
203588_s_at	0.000259286	0.0103089	-0.594869	8.13229
203594_at	0.00119691	0.0245746	-0.647088	7.35848
203598_s_at	7.13e-05	0.00503466	0.604494	6.3828
203625_x_at	4.75e-06	0.00128909	-0.970289	7.34686
203626_s_at	0.000748219	0.0187428	-0.611123	6.63933
203630_s_at	0.00162166	0.0292043	-0.509936	9.30153
203666_at	2.42e-06	0.000899049	1.21593	9.64518
203690_at	0.00226151	0.0359342	-0.527973	6.65145
203721_s_at	2.51e-06	0.000915914	-0.854811	9.59809
203725_at	2.25e-06	0.000878057	1.98956	8.87107
203755_at	5.48e-06	0.00141834	-1.2756	9.08125
203764_at	0.000758077	0.0189085	-1.18849	8.28007
203782_s_at	0.000256212	0.0102416	-0.5392	7.98535
203803_at	0.00280012	0.0402486	0.707974	8.29723
203806_s_at	0.00063765	0.0172599	-0.50562	8.22346
203830_at	9.64e-06	0.00188401	-0.786403	5.16712
203836_s_at	0.000413529	0.0134484	-0.646242	7.4856
203849_s_at	0.00300661	0.0420267	-0.668143	6.07007
203855_at	0.000400842	0.013281	0.536271	7.98164
203881_s_at	0.000899379	0.0210119	0.61472	4.45781
203887_s_at	0.00340109	0.0451526	1.32462	8.35035
203888_at	0.000435011	0.0138242	0.978252	8.17863
203906_at	0.00188838	0.0321616	-0.573547	8.12789
203907_s_at	0.00115452	0.0240739	-0.509812	7.77735
203927_at	0.00381761	0.0485474	0.600148	7.60998
203967_at	1.43e-05	0.00215969	-0.887254	7.15887
203972_s_at	1.42e-06	0.000669671	-0.995587	7.94977
203973_s_at	0.00124809	0.0251153	0.551374	8.61764
203976_s_at	3.28e-05	0.00335203	-0.641575	8.01138
203978_at	0.000164371	0.00813306	-0.504777	8.6083
203987_at	4.32e-05	0.00380678	0.690374	10.0828
203999_at	0.00245367	0.037619	-0.526531	8.57609
204023_at	9.7e-05	0.00590423	-0.680427	8.7185
204039_at	0.00025153	0.0101694	0.737973	9.38683
204055_s_at	0.000549187	0.0159093	0.503368	4.35433
204059_s_at	0.000318048	0.011711	-0.653201	9.09313
204060_s_at	0.000968348	0.0220121	0.501194	7.46463
204061_at	0.00390427	0.0490843	0.615069	7.08579
204066_s_at	3.63e-05	0.00353059	-0.867896	8.51254
204075_s_at	0.00173788	0.0304841	0.568224	4.87978
204082_at	0.00105832	0.0230011	-0.79339	9.61175
204092_s_at	0.000230709	0.00973391	-0.716765	9.24006
204105_s_at	0.00332652	0.0446146	-0.969938	9.79009
204126_s_at	0.000325533	0.0118643	-0.707753	8.70869
204127_at	0.000358828	0.0124511	-0.615363	9.91322
204128_s_at	9.3e-05	0.00580951	-0.799463	7.67749
204146_at	0.000252641	0.0101958	-0.844352	7.39542
204162_at	8.3e-06	0.00172007	-1.60896	7.2871
204203_at	0.000124992	0.00689749	-0.690187	7.68224
204224_s_at	0.00120496	0.0246718	0.883737	9.26295
204240_s_at	0.00251652	0.0382405	-0.578678	8.37452
204244_s_at	1.39e-05	0.00215969	-1.01001	8.16153
204250_s_at	0.000212018	0.0093058	0.524834	6.88722
204264_at	0.00183086	0.0314707	0.654084	6.60825
204274_at	5.12e-05	0.00419298	-0.800184	9.02952
204278_s_at	0.000108252	0.00639663	-0.651655	8.91794
204284_at	0.00222667	0.0355581	-1.06341	8.98783
204285_s_at	0.000329045	0.0119189	1.2773	8.19255
204286_s_at	0.00237653	0.0369337	1.25667	5.62112
204299_at	0.000188412	0.00874992	-1.0253	6.88952
204315_s_at	1.85e-05	0.00246695	-0.927741	7.56338
204317_at	0.00020535	0.00915819	-0.608523	7.0383
204318_s_at	5.33e-05	0.00430531	-0.800315	7.89591
204341_at	0.00371806	0.0477665	-0.571662	8.24697
204379_s_at	0.00023401	0.00978057	0.631229	8.31464
204384_at	0.00149702	0.0278874	-0.677598	8.26198
204417_at	0.000327004	0.0118643	0.775017	9.28181
204420_at	0.00334674	0.0448049	1.26365	6.87666
204444_at	2.79e-05	0.00307835	-0.986245	7.6464
204478_s_at	0.000477338	0.0145667	-0.525392	9.73107
204484_at	9.24e-05	0.00580951	-0.737172	9.33433
204492_at	0.0004103	0.0134469	-0.629543	4.92026
204510_at	0.000699603	0.0180383	-0.595055	7.12755
204516_at	0.000532347	0.0157074	0.537367	8.09385
204531_s_at	0.00105939	0.0230019	-0.671054	7.19659
204566_at	1.9e-06	0.000782329	0.922952	11.619
204612_at	0.00075882	0.0189085	-0.805779	8.30291
204623_at	0.00141727	0.027118	0.622568	8.91056
204633_s_at	0.000277693	0.0108339	0.533224	8.14303
204641_at	0.00118882	0.0245217	-0.679742	7.5039
204651_at	4.41e-05	0.00384724	-0.681385	6.49118
204652_s_at	1.96e-06	0.000792881	-0.912664	6.53214
204709_s_at	1.73e-05	0.00241228	-1.05436	7.53901
204734_at	7.63e-05	0.00523105	0.562578	5.93408
204735_at	0.0027658	0.0400349	0.711302	6.68884
204752_x_at	0.000140656	0.00737634	-0.680692	9.35045
204759_at	0.000131681	0.00713737	0.603361	4.37505
204780_s_at	1.12e-05	0.0019996	2.24804	7.3548
204781_s_at	1.09e-06	0.000608791	1.98735	6.54259
204793_at	0.000994583	0.0223575	0.553633	5.5985
204805_s_at	1.62e-05	0.00233708	-0.861011	10.4405
204817_at	0.000400853	0.013281	-0.585452	9.18085
204822_at	9.56e-05	0.00586566	-1.08402	7.68369
204825_at	1.81e-06	0.000775255	-0.86212	9.32655
204827_s_at	6.14e-05	0.00465284	-0.815648	7.13042
204835_at	0.000122891	0.00688161	-0.56421	8.09831
204857_at	0.000184793	0.00872168	-0.607932	7.57936
204941_s_at	0.000187755	0.00874992	-0.574308	7.31571
204942_s_at	5.69e-05	0.0045274	-0.732582	8.1273
204944_at	0.00103286	0.0226995	-0.814546	7.23627
204957_at	2.79e-05	0.00307835	-0.691319	8.81329
204958_at	6.67e-05	0.00483999	0.993842	7.34576
204962_s_at	3.74e-07	0.000392314	-1.37378	8.2613
204969_s_at	3.01e-05	0.00322055	-0.728445	8.47761
204970_s_at	0.000637479	0.0172599	0.543587	8.12819
204975_at	6.32e-05	0.00472689	-0.604606	10.9647
204977_at	0.000289878	0.0110765	-0.54363	7.76213
204990_s_at	0.00107097	0.0231183	-0.536648	10.633
204999_s_at	0.000141753	0.00737634	0.676252	8.25799
205024_s_at	0.000159429	0.0079811	-0.596034	8.45052
205031_at	0.00014089	0.00737634	-0.764939	7.69175
205034_at	0.00116073	0.0241661	-0.801584	8.91566
205046_at	4.01e-05	0.00371758	-1.14163	7.11112
205053_at	1.1e-05	0.0019996	-0.775749	9.11864
205060_at	0.000338126	0.0120326	0.621523	8.21443
205063_at	1.4e-05	0.00215969	-1.24876	5.3977
205085_at	0.000147577	0.00752306	-0.758193	6.1236
205093_at	0.000127341	0.00697212	-0.511856	7.73426
205109_s_at	0.00121662	0.0248648	-0.652424	5.89442
205110_s_at	0.000561182	0.0161101	-1.13975	7.90607
205135_s_at	0.000700996	0.0180533	-0.576567	6.69468
205160_at	8.43e-05	0.00553996	0.780103	8.07588
205161_s_at	0.000801214	0.0195351	0.512792	8.26161
205167_s_at	2.84e-05	0.00310556	-0.673012	7.65596
205187_at	0.000402752	0.0133117	0.567255	7.38146
205240_at	0.000684008	0.0179152	-0.579248	8.73215
205253_at	0.00108629	0.0232463	-0.562614	7.69949
205266_at	0.000601722	0.0166723	0.749254	7.57718
205282_at	0.0013333	0.0262106	-0.954378	6.4667
205286_at	1.52e-05	0.00221575	0.637709	11.05
205287_s_at	0.000360988	0.0124882	0.5517	9.73721
205292_s_at	0.000441171	0.0139404	-0.661046	11.5076
205303_at	5.71e-06	0.00146215	-1.46075	7.63644
205304_s_at	8.42e-06	0.00172007	-1.43572	7.72529
205339_at	3.36e-05	0.00337517	-0.827808	7.02376
205345_at	1.27e-05	0.00211841	-0.80854	8.4119
205356_at	5.91e-05	0.00456979	-0.637111	8.8218
205386_s_at	5.05e-07	0.000433422	1.14954	5.64268
205393_s_at	0.000149386	0.00759788	-0.682449	4.54357
205394_at	0.000197541	0.00899794	-0.855451	6.31244
205399_at	0.000598384	0.0166419	-0.596476	6.31514
205413_at	2.68e-05	0.00302951	-0.987567	4.82644
205436_s_at	1.26e-08	5.63e-05	-1.49705	11.8806
205440_s_at	0.0010745	0.0231288	1.59961	9.80582
205492_s_at	0.000687213	0.0179263	0.91305	7.47398
205493_s_at	0.00233789	0.0366656	1.21214	6.68718
205500_at	0.000157367	0.00789565	-0.565659	7.03124
205519_at	0.000673661	0.017739	-0.811533	6.38739
205531_s_at	2.86e-06	0.000986461	2.4572	8.04647
205543_at	0.00138432	0.0266769	1.20741	7.54828
205565_s_at	0.00181122	0.0313266	-0.508839	6.15555
205573_s_at	0.000798761	0.019511	-0.59244	8.8363
205596_s_at	0.000326836	0.0118643	0.55456	9.54462
205598_at	0.00307757	0.0426897	-0.608955	6.47009
205613_at	0.00161398	0.0291367	0.500389	6.74193
205696_s_at	0.00237371	0.0369337	-0.518944	10.2391
205756_s_at	7.05e-07	0.000503669	1.002	7.34812
205769_at	0.00029405	0.0111525	-0.529369	7.4837
205792_at	1.45e-05	0.00216379	1.07691	10.6572
205858_at	0.000460027	0.0142918	0.744029	6.572
205862_at	0.00297348	0.0417129	1.36075	9.30111
205910_s_at	0.00057948	0.0163613	0.570097	6.12952
206036_s_at	0.000444253	0.0139981	-0.688456	6.45896
206043_s_at	0.00029047	0.0110801	-0.503745	8.15744
206052_s_at	0.000117225	0.00669596	-0.659898	9.40036
206066_s_at	0.000456419	0.0142355	0.587546	11.0224
206081_at	0.00336865	0.0450171	-0.536804	7.41237
206095_s_at	4.28e-05	0.00379742	-0.804267	8.72479
206102_at	0.00041195	0.0134484	-0.691364	9.2287
206103_at	2.2e-05	0.00269176	-0.615814	7.55099
206108_s_at	0.00163351	0.029244	-0.848975	8.49913
206140_at	4.76e-05	0.00400986	-1.75147	6.87091
206205_at	4.68e-05	0.00398113	-0.940041	6.96158
206222_at	8.3e-07	0.00054389	2.97133	8.54984
206245_s_at	0.00178571	0.0310783	-0.547006	9.23681
206247_at	0.00015431	0.00775974	1.02283	9.11178
206280_at	0.00171549	0.0302342	-0.573774	7.92916
206357_at	0.00255	0.0384606	-0.500139	6.13445
206364_at	9.84e-05	0.00597025	-1.50533	7.38163
206414_s_at	0.000266302	0.0104998	-0.620053	8.49594
206440_at	0.0022214	0.0355249	-0.602871	6.46031
206452_x_at	0.000475568	0.0145326	-0.513802	9.67967
206499_s_at	4.44e-05	0.00384724	-0.677857	9.59392
206503_x_at	0.00100213	0.0223917	0.589988	6.29033
206533_at	4.71e-05	0.00399057	-0.724295	7.35214
206566_at	8.89e-05	0.00565809	-0.807037	7.63147
206683_at	8.63e-05	0.00559488	-1.23572	5.4711
206689_x_at	0.0010763	0.0231288	-0.609212	8.76825
206723_s_at	8.09e-05	0.00538422	-0.563403	8.79916
206752_s_at	0.000995608	0.022358	-0.667327	5.76932
206794_at	0.00243036	0.0374161	-0.511092	5.9212
206858_s_at	9.35e-06	0.00184385	-1.07398	8.22037
206925_at	0.00271299	0.0396831	-0.5613	6.77048
206928_at	0.000254416	0.0102304	0.763862	7.60556
206929_s_at	0.000109926	0.00642852	-0.606168	8.35737
206953_s_at	0.000622199	0.0169654	-0.595806	5.49688
207017_at	6.77e-05	0.0048783	-0.707788	6.38618
207018_s_at	0.00370971	0.0477665	-1.03919	6.29483
207060_at	0.00164597	0.0293258	0.76695	6.73395
207124_s_at	0.000812888	0.0197478	-0.531575	8.44182
207165_at	0.00266156	0.0392972	-0.982615	8.20889
207233_s_at	0.00106616	0.0230729	0.516692	7.13032
207304_at	5.71e-05	0.0045304	-0.800067	5.25168
207332_s_at	5.37e-06	0.00140829	0.889122	12.3223
207357_s_at	0.00211708	0.0345511	-0.687637	8.43904
207501_s_at	0.000854	0.0204565	-0.98728	7.14263
207549_x_at	0.000907767	0.0211089	0.533208	9.52047
207574_s_at	0.000174884	0.00841446	0.70633	8.62005
207590_s_at	0.00129313	0.0257581	-0.758598	7.29618
207688_s_at	0.000323821	0.0118643	-0.635331	8.91996
207695_s_at	0.000671163	0.0177361	0.805939	8.11842
207733_x_at	0.00202387	0.0337215	0.659133	8.06633
207740_s_at	4.83e-05	0.00403091	-0.771568	9.21748
207813_s_at	3.22e-09	2.39e-05	2.12941	8.77781
207828_s_at	9.87e-07	0.000578784	-1.057	8.41061
207847_s_at	0.00160322	0.0290365	-0.507772	9.88671
207996_s_at	3.58e-05	0.00349465	-0.634141	4.25588
208033_s_at	8.15e-06	0.00172007	-0.997339	7.56842
208070_s_at	0.000283104	0.0109302	0.574551	9.00553
208078_s_at	0.00333519	0.0447039	0.510495	8.26661
208079_s_at	0.000278713	0.0108547	-0.777308	9.69565
208156_x_at	4.09e-05	0.00374516	0.915381	9.39868
208165_s_at	0.000110235	0.00642852	-0.81892	6.51355
208289_s_at	1.29e-05	0.00211885	1.11137	9.6792
208313_s_at	0.000915436	0.0212445	-0.544154	10.5005
208314_at	0.000178218	0.00848326	0.584056	6.11299
208370_s_at	0.00045179	0.0141754	0.651047	6.49368
208433_s_at	0.000608007	0.0167839	-0.95035	8.15807
208478_s_at	5.78e-05	0.0045509	1.1291	8.43307
208502_s_at	0.000653423	0.0174536	-0.5611	6.22655
208510_s_at	0.000112864	0.00653536	-0.74806	7.07159
208553_at	2.99e-05	0.00321418	-0.655872	6.95328
208616_s_at	1.11e-05	0.0019996	-0.747343	11.1159
208659_at	7.53e-05	0.00517917	-0.528952	11.351
208672_s_at	3.4e-07	0.000378183	-1.12701	10.991
208673_s_at	4.23e-07	0.000392314	-1.28515	8.42172
208691_at	1.06e-05	0.00198246	0.815321	12.4841
208729_x_at	0.00111625	0.0236376	0.59222	9.53961
208753_s_at	0.000979027	0.0221466	0.512508	9.36506
208754_s_at	0.00289565	0.0411131	0.645871	8.8837
208758_at	0.000104309	0.00624651	-0.643853	11.263
208765_s_at	3.81e-05	0.00359778	-0.752879	10.2538
208766_s_at	2.3e-05	0.00278008	-0.770487	10.7142
208767_s_at	0.00255588	0.0384971	0.510172	12.149
208783_s_at	0.00249812	0.0380127	0.501928	9.07898
208787_at	1.48e-05	0.00218815	-0.728011	10.7089
208793_x_at	0.000139373	0.0073574	-0.503042	9.59744
208795_s_at	4.08e-06	0.00119984	-0.900661	10.0348
208796_s_at	4.09e-07	0.000392314	1.52811	10.7346
208804_s_at	0.0026837	0.039488	-0.628954	9.40252
208812_x_at	0.000302645	0.0113454	0.73885	11.2894
208814_at	1.43e-05	0.00215969	0.76391	8.29375
208822_s_at	4.46e-05	0.00384881	-0.603253	9.63019
208829_at	0.00244597	0.0375527	0.503473	10.1923
208863_s_at	2.55e-05	0.00295023	-0.955154	9.6142
208875_s_at	6.96e-05	0.00497596	-0.693644	10.0607
208900_s_at	0.000362699	0.0124882	0.679838	10.4938
208922_s_at	4.25e-05	0.00378926	0.930271	10.0976
208926_at	0.000444198	0.0139981	0.735254	9.78902
208939_at	0.000730003	0.0184589	-0.570284	8.99871
208956_x_at	6.69e-05	0.00483999	-0.650245	10.4556
208978_at	0.000440903	0.0139404	-0.588044	10.0152
208991_at	8.71e-05	0.00562045	0.699497	9.71975
208992_s_at	0.000300211	0.0112779	0.562466	9.53597
209006_s_at	6.49e-05	0.00477632	0.711421	8.67161
209025_s_at	4.73e-06	0.00128909	-0.840689	9.63435
209026_x_at	0.0016088	0.0290904	-0.62656	12.6478
209048_s_at	1.22e-05	0.00208277	-1.09447	9.64053
209049_s_at	2.73e-06	0.000964751	-1.05759	9.67611
209067_s_at	1.38e-05	0.00215969	-1.39736	9.19315
209075_s_at	9.35e-06	0.00184385	1.03395	10.5585
209098_s_at	0.000315286	0.0116671	0.737792	6.334
209099_x_at	3.71e-05	0.00354906	0.837401	6.98046
209119_x_at	0.00158671	0.0288539	-0.634749	9.6159
209140_x_at	0.000224251	0.00957682	0.607697	9.68837
209151_x_at	0.000184248	0.00871441	-0.630597	7.38575
209154_at	4.43e-05	0.00384724	0.730117	11.82
209155_s_at	0.000246304	0.0100862	-0.645302	10.3377
209172_s_at	0.00218154	0.0350729	-0.696161	4.84891
209175_at	0.000236619	0.00981593	-0.545485	7.77155
209184_s_at	0.000281224	0.0108764	0.691435	8.57372
209185_s_at	0.00236444	0.0369325	0.798751	8.81657
209189_at	2.09e-06	0.000830349	1.58461	8.40867
209192_x_at	0.000331449	0.0119865	-0.602223	8.71449
209201_x_at	8.86e-05	0.0056571	0.596328	7.97115
209260_at	0.00381806	0.0485474	0.904218	10.9411
209294_x_at	7.02e-08	0.000167455	1.82728	9.07955
209295_at	1.88e-09	2.1e-05	2.45147	9.4036
209304_x_at	0.000455875	0.0142355	0.501108	8.89275
209306_s_at	0.000754607	0.0188669	0.577074	6.66951
209330_s_at	1.76e-06	0.000767665	-1.34616	8.80417
209345_s_at	0.000590461	0.0165455	0.632149	9.0288
209348_s_at	0.000223043	0.00955526	0.601892	4.76143
209368_at	0.00381512	0.0485474	0.596808	6.16576
209375_at	7.52e-08	0.000167455	1.31235	10.4355
209406_at	0.00181385	0.0313475	-0.550032	5.21744
209408_at	0.00025565	0.0102416	-0.824942	8.87813
209421_at	6.22e-06	0.00147294	-0.781165	8.85267
209431_s_at	1.47e-06	0.000669671	-1.28689	7.77212
209442_x_at	0.000967486	0.0220121	-0.75431	8.88432
209449_at	6.5e-06	0.00150844	-0.70895	9.19775
209464_at	0.00087273	0.020617	-0.637353	8.51668
209482_at	0.000782553	0.0192499	-0.554491	9.55316
209488_s_at	0.0021615	0.0349178	-0.533482	9.14892
209520_s_at	9.08e-05	0.00574462	-0.543104	8.42673
209526_s_at	0.000375331	0.0127848	-0.696649	10.2778
209527_at	0.00128956	0.0257184	-0.741213	8.49152
209574_s_at	0.000920419	0.0213062	-0.622466	6.26201
209610_s_at	0.000831271	0.0200298	-0.51055	6.49805
209617_s_at	0.000820234	0.0198829	-1.06842	7.87044
209642_at	2.16e-05	0.00269008	-1.21358	7.57157
209656_s_at	0.00131971	0.0260169	0.616041	4.78551
209667_at	0.000145967	0.00745807	0.664332	7.91499
209674_at	0.00151217	0.0280722	0.725149	7.47073
209681_at	0.00012996	0.00709589	0.615207	9.31887
209687_at	7.31e-06	0.00161848	1.31899	9.20676
209692_at	0.00363451	0.0471006	-0.532035	6.95197
209711_at	0.000308423	0.0114606	0.521929	8.0505
209714_s_at	0.00210037	0.0343792	-0.730991	9.28287
209723_at	0.000592772	0.0165742	0.626201	5.25543
209762_x_at	0.00189224	0.0321767	-0.834357	7.58827
209775_x_at	0.000244035	0.0100117	-0.520484	5.65756
209776_s_at	3.9e-05	0.00366692	-1.14553	6.99169
209825_s_at	0.00274809	0.0398822	-0.540578	8.14793
209832_s_at	0.00119603	0.0245746	-0.594031	8.5717
209836_x_at	0.00215448	0.0348803	-0.51513	10.4859
209891_at	6.37e-07	0.000489622	-1.13926	7.50101
209899_s_at	5.88e-05	0.00456979	-0.615574	11.0941
209902_at	0.00137312	0.0265522	-0.539883	6.24218
209917_s_at	0.000344081	0.0120983	0.651443	9.06908
209932_s_at	0.000537381	0.0157497	-0.513794	10.0762
209992_at	5.97e-05	0.00458504	0.602383	5.99618
209998_at	0.000106266	0.00631276	-0.616288	8.43107
210001_s_at	0.000218104	0.00943943	0.687718	7.16493
210028_s_at	2.56e-05	0.00295023	-0.673167	7.5354
210052_s_at	0.000142506	0.00737634	-0.95389	9.73825
210074_at	8.42e-05	0.00553996	0.628405	8.47865
210111_s_at	0.000424739	0.0136535	0.609947	8.7649
210117_at	0.000150141	0.0076034	0.704273	7.37601
210166_at	1.45e-06	0.000669671	1.00258	6.67533
210178_x_at	3.79e-06	0.001158	-0.87864	9.73283
210180_s_at	2.65e-06	0.000951485	-0.983045	7.60593
210220_at	0.00169836	0.0300658	-1.0463	7.12153
210230_at	2.98e-07	0.000378183	1.5425	8.91608
210263_at	0.00153513	0.0283332	0.602794	7.41405
210278_s_at	0.00012738	0.00697212	0.709632	6.87898
210312_s_at	0.000225515	0.00957682	0.615268	9.39183
210362_x_at	0.00065275	0.0174536	0.612694	6.83188
210389_x_at	0.000168871	0.00823182	-0.586217	10.2505
210400_at	0.000675744	0.0177728	1.05563	6.35044
210405_x_at	1.92e-08	7.12e-05	1.926	8.74933
210483_at	0.0027249	0.0397251	0.554594	6.68793
210484_s_at	4.29e-06	0.00121307	1.68587	7.56604
210559_s_at	0.00123477	0.0250064	-0.621978	9.49047
210561_s_at	8.66e-06	0.00175467	0.734457	10.4098
210567_s_at	0.000981523	0.0221534	-0.584822	5.36252
210581_x_at	8.31e-06	0.00172007	-0.790509	7.41627
210582_s_at	7.24e-05	0.0050534	0.919946	9.0657
210592_s_at	2.09e-05	0.00265708	0.863434	9.79397
210609_s_at	1.49e-05	0.00218815	2.63158	9.49977
210640_s_at	0.00349484	0.0459048	-0.80073	8.90628
210656_at	0.00125174	0.0251443	0.721186	4.96547
210672_s_at	0.00163876	0.0292521	-0.510374	7.88211
210754_s_at	0.000171728	0.0083346	-0.780694	7.99107
210774_s_at	0.000216886	0.00943943	0.519355	11.1137
210778_s_at	1.73e-05	0.00241228	0.903496	8.69119
210779_x_at	9.67e-05	0.00590042	-1.01722	7.35801
210791_s_at	0.000702567	0.0180728	-0.636326	7.21956
210793_s_at	7.74e-05	0.00528979	-0.799039	6.33702
210821_x_at	0.00175041	0.0306315	-0.530257	8.67827
210827_s_at	0.00021088	0.0093058	0.540143	9.2276
210854_x_at	0.00102849	0.0226624	1.08264	8.66405
210933_s_at	0.00025436	0.0102304	2.02629	6.74736
210947_s_at	8.64e-05	0.00559488	-0.559712	7.43004
210983_s_at	1.16e-05	0.00201691	-0.861729	10.9294
211013_x_at	0.000105138	0.00627648	0.894614	7.25329
211042_x_at	4.03e-06	0.00119984	-0.786132	7.63707
211097_s_at	0.000256009	0.0102416	-0.583745	5.63015
211114_x_at	0.000624344	0.0169982	-0.724527	8.03327
211115_x_at	4.36e-05	0.00381968	-0.711446	8.00637
211116_at	0.000943361	0.02171	-0.522644	7.40748
211163_s_at	7.38e-10	1.64e-05	3.24876	7.93705
211212_s_at	0.000336322	0.011991	-0.537557	7.4072
211219_s_at	7.89e-05	0.00534235	-0.990606	7.52442
211316_x_at	5.59e-05	0.00448239	0.59008	7.88695
211391_s_at	3.17e-05	0.00330505	-0.783013	8.25914
211392_s_at	0.000520167	0.0154092	-0.657542	9.09132
211450_s_at	0.000420697	0.0136021	-0.658054	9.29534
211519_s_at	0.00013246	0.00716219	-0.642557	8.13982
211543_s_at	6.52e-05	0.00477632	-0.58601	7.34078
211576_s_at	1.33e-06	0.000669671	-1.04271	8.08648
211714_x_at	0.000496091	0.0148941	-0.688704	13.022
211715_s_at	1.14e-05	0.00200752	-0.899484	8.11098
211725_s_at	0.0020549	0.0340096	-0.510723	8.85085
211763_s_at	0.000166571	0.00816517	-0.673704	8.29844
211784_s_at	1.77e-05	0.00244894	-1.0392	10.8874
211810_s_at	0.00146543	0.0275787	0.688715	7.91479
211814_s_at	0.00059727	0.0166317	-0.597141	7.71904
211829_s_at	0.00247716	0.0378505	-1.11742	7.48367
211832_s_at	5.57e-05	0.00448192	0.818683	6.86967
211833_s_at	4.24e-05	0.00378926	1.22024	8.66448
211899_s_at	0.000111003	0.00645641	0.57912	9.48828
211911_x_at	0.000710958	0.0181363	0.612718	9.80798
211919_s_at	0.00155346	0.0284766	0.64434	7.73801
211931_s_at	2.79e-05	0.00307835	-0.70939	11.1911
211998_at	0.00185121	0.0317226	0.52653	9.25116
212020_s_at	0.000177214	0.00845355	-0.591915	9.08454
212021_s_at	2.71e-05	0.00304975	-0.642567	9.54892
212022_s_at	1.39e-05	0.00215969	-0.955722	8.64665
212030_at	0.000489093	0.0147436	-0.53478	8.33765
212033_at	0.000326499	0.0118643	-0.585892	9.12706
212037_at	0.00251961	0.0382613	-0.571481	8.7159
212071_s_at	1.68e-05	0.0023968	-0.931686	10.2349
212079_s_at	0.000731432	0.0184672	0.523704	8.29412
212093_s_at	0.00402325	0.0499866	-0.653459	7.97978
212095_s_at	0.000484129	0.0146734	-0.585659	7.91333
212096_s_at	0.000651512	0.0174536	-0.747408	8.57208
212111_at	8.86e-05	0.0056571	0.766085	8.28861
212112_s_at	0.000247592	0.0101131	0.642305	9.1661
212137_at	8.05e-05	0.00538422	-0.606132	10.3959
212141_at	0.00082677	0.0199545	-0.53831	10.044
212148_at	0.00231245	0.0364318	-0.682315	8.22395
212160_at	8.3e-05	0.0054834	-0.523053	10.1331
212164_at	0.000772201	0.0190925	0.609885	7.55757
212215_at	0.00103979	0.0227891	0.55837	8.75836
212233_at	0.000453879	0.0142209	-0.619672	6.39839
212254_s_at	0.00104317	0.0228054	-0.639836	8.54726
212277_at	0.0029231	0.0412867	-0.500064	8.92312
212281_s_at	0.00258708	0.0388883	-0.51417	10.425
212290_at	1.31e-05	0.00212508	-0.874673	8.82484
212295_s_at	9.83e-06	0.00190332	-0.89929	9.68385
212320_at	6.65e-05	0.00483999	-0.72161	11.6999
212334_at	0.000232211	0.00977876	0.636126	10.205
212335_at	0.000340122	0.0120651	0.613501	9.66686
212346_s_at	3.74e-05	0.0035568	0.975768	9.05527
212347_x_at	0.00157498	0.0287588	0.551033	9.67999
212378_at	1.66e-05	0.00238828	-0.885531	7.40322
212397_at	0.000993206	0.0223491	-0.656845	10.2072
212398_at	0.0033081	0.0445016	-0.520824	9.66354
212403_at	2.1e-05	0.00265708	0.712507	8.44096
212404_s_at	0.000134015	0.00722868	0.582242	7.92209
212436_at	0.000305458	0.0114173	-0.501717	9.74347
212445_s_at	8.59e-05	0.00559488	-0.676964	7.38603
212454_x_at	0.000597182	0.0166317	-1.12685	9.58823
212460_at	0.00189472	0.0321767	0.685647	10.2861
212462_at	8.09e-05	0.00538422	-0.56693	8.80395
212463_at	0.00263097	0.0392064	0.526568	8.61786
212481_s_at	0.00169818	0.0300658	-0.57364	10.9101
212510_at	6.86e-06	0.00157565	0.722101	10.4777
212511_at	0.000233283	0.00978057	-0.585821	6.74372
212512_s_at	0.000823993	0.0199151	-0.682264	8.25749
212525_s_at	1.41e-07	0.000238009	-1.30532	10.1456
212543_at	0.0018995	0.0321788	-0.66475	9.15814
212563_at	0.000142321	0.00737634	-0.898166	7.69544
212599_at	0.000351876	0.0122681	0.834474	6.15906
212660_at	0.000197819	0.00899794	-0.588484	8.90081
212675_s_at	0.00154229	0.0283712	0.584345	7.64865
212720_at	0.000513466	0.0152921	0.590271	8.58046
212722_s_at	0.000388327	0.0130087	-0.548415	6.91334
212730_at	0.000793748	0.0194525	0.849397	7.60777
212745_s_at	0.000212625	0.0093058	0.546002	7.20555
212761_at	6.07e-05	0.00463297	-0.689266	7.9073
212785_s_at	0.00128594	0.0256692	-0.555727	7.81204
212799_at	2.68e-05	0.00302951	0.642083	9.65971
212800_at	3.7e-05	0.00354906	0.760804	8.17355
212819_at	0.00146578	0.0275787	0.732733	5.68349
212830_at	0.00291042	0.0411915	-0.538028	8.29059
212835_at	0.000711547	0.0181363	0.50604	7.61459
212846_at	0.000123872	0.00689749	-0.59801	8.64871
212858_at	0.000345231	0.0120983	-0.515393	8.88264
212875_s_at	5.99e-05	0.00458504	-1.03614	7.12961
212885_at	1.81e-05	0.00245029	-0.653494	8.64506
212944_at	0.00216968	0.0349579	0.637726	7.87279
212949_at	2.45e-05	0.00287534	-0.816925	8.51649
212955_s_at	7.34e-06	0.00161848	-0.81035	9.94323
212966_at	0.000620707	0.0169538	0.799084	7.48382
212973_at	0.000178888	0.00849701	0.520115	8.88735
212977_at	8.87e-06	0.00177994	-0.8926	8.91845
212992_at	0.000915507	0.0212445	1.36629	6.51025
212993_at	1.37e-06	0.000669671	0.869852	9.29128
213005_s_at	0.00167963	0.029862	-0.567976	7.20906
213014_at	0.000471123	0.0144962	-0.51198	6.12813
213017_at	0.000771973	0.0190925	0.809697	7.20234
213038_at	2.14e-05	0.00268388	0.846394	8.00718
213051_at	0.00332035	0.0445856	0.657458	8.58409
213076_at	0.000972567	0.0220406	0.505804	7.99677
213115_at	0.000864807	0.0205387	0.576957	8.10814
213116_at	9.12e-05	0.00575777	-0.580256	6.13383
213149_at	0.00288776	0.0410272	-0.506989	6.64857
213164_at	0.000105373	0.00627648	0.805654	8.67548
213188_s_at	0.000298037	0.0112341	-0.872812	6.84101
213189_at	0.000110045	0.00642852	-0.881627	7.84628
213195_at	0.000199128	0.00899794	0.739966	7.74778
213222_at	2.31e-06	0.000878057	-1.10487	7.94293
213226_at	0.000186416	0.00872436	-0.893379	7.90215
213242_x_at	0.000212107	0.0093058	0.736976	10.3591
213298_at	0.000150177	0.0076034	-0.599286	7.56455
213302_at	0.000286139	0.0109783	-0.669413	7.63969
213308_at	0.00120261	0.0246462	-0.760802	7.62437
213326_at	0.000824247	0.0199151	0.556519	7.24277
213331_s_at	6.28e-06	0.00147294	-0.762338	5.39935
213338_at	0.000142712	0.00737634	0.762441	6.73001
213344_s_at	5.98e-06	0.00146673	-0.759985	8.82728
213375_s_at	0.000951941	0.0217972	0.51653	5.91494
213390_at	0.00333836	0.0447196	-0.517381	9.60641
213391_at	3.04e-05	0.00322055	-0.587999	8.91954
213400_s_at	0.000269456	0.010531	-0.614236	9.09291
213427_at	7.46e-05	0.00514438	-0.786497	8.59212
213452_at	0.002689	0.0395138	-0.803342	6.21666
213478_at	0.0023987	0.0372116	-0.678685	7.90917
213508_at	0.000109321	0.00642571	0.98627	9.14566
213562_s_at	0.00228747	0.0361496	-0.538877	8.91952
213577_at	0.00107665	0.0231288	-0.53182	10.669
213593_s_at	0.00265788	0.0392972	0.519041	7.65083
213594_x_at	3.28e-05	0.00335203	-0.787461	9.37473
213632_at	0.000120076	0.00680646	-0.518178	6.53992
213657_s_at	0.00194908	0.0327943	0.549253	7.5904
213677_s_at	0.000138229	0.0073574	-0.724461	7.43704
213843_x_at	0.000778676	0.0192289	0.960806	8.43017
213844_at	0.000460632	0.0142918	0.573919	7.85711
213874_at	0.0011051	0.0235228	0.500233	6.87578
213882_at	0.0020109	0.033551	0.607493	5.71899
213883_s_at	3.36e-05	0.00337517	0.602851	8.21478
213912_at	0.000647506	0.0174419	-0.708256	6.96531
213913_s_at	0.000217437	0.00943943	-0.912393	7.10773
213918_s_at	0.00232663	0.0365775	-0.553331	8.08437
213923_at	0.000121243	0.00685514	0.622982	10.4375
213988_s_at	4.87e-05	0.00404548	0.685407	9.01946
214030_at	0.000574016	0.0162666	-0.511245	7.37278
214039_s_at	0.0038415	0.0486787	0.512658	12.5932
214086_s_at	2.42e-05	0.00285714	-0.961033	7.74327
214138_at	3.98e-05	0.00371758	0.821924	7.09987
214141_x_at	1.86e-05	0.00246695	-0.662964	11.2529
214157_at	0.00270358	0.0395714	0.500189	7.85968
214258_x_at	0.000173633	0.00837233	-0.628202	8.9715
214349_at	0.00105644	0.0229828	0.522212	8.04961
214404_x_at	0.000189017	0.00874992	-0.714374	9.25231
214415_at	0.000232739	0.00978057	0.511919	4.2844
214459_x_at	6.46e-05	0.00477632	0.629871	11.183
214474_at	0.000206549	0.00917339	0.609949	7.70443
214500_at	0.000280922	0.0108764	0.607518	7.76637
214507_s_at	0.000540143	0.0157497	-0.59675	9.03218
214537_at	6.05e-06	0.00146673	-0.776907	7.96883
214658_at	0.000600205	0.016651	0.513302	7.44299
214670_at	2.98e-05	0.00321418	0.734335	9.57241
214696_at	0.00058316	0.0164444	0.650798	7.77331
214700_x_at	3.53e-05	0.00348309	-0.695333	6.27065
214710_s_at	0.000317877	0.011711	-0.984363	9.76676
214718_at	0.00294544	0.0414239	0.505881	8.96597
214728_x_at	0.000611505	0.0168067	-0.512615	10.0944
214746_s_at	1.9e-05	0.00248346	-0.821719	8.07069
214755_at	0.000441055	0.0139404	-0.749167	7.97702
214760_at	0.000378659	0.0128208	0.642768	8.53161
214791_at	0.00228805	0.0361496	-0.527924	6.72154
214794_at	0.00123373	0.0250064	0.599978	8.97438
214804_at	0.0011122	0.0236353	-1.08511	7.13597
214878_at	0.000361998	0.0124882	0.738546	5.10321
214882_s_at	3.16e-05	0.00330505	-0.836565	10.3052
214909_s_at	0.000161383	0.00803571	-0.535435	8.82381
214912_at	0.00225947	0.0359273	0.798477	5.11383
215016_x_at	0.00113295	0.0238101	-0.605562	8.63337
215043_s_at	0.000958356	0.0218781	-0.581424	6.02588
215068_s_at	2.39e-05	0.00284776	0.78316	8.83905
215084_s_at	0.000122752	0.00688161	-0.512562	7.38886
215109_at	0.000430145	0.013748	0.532082	6.4427
215128_at	0.00158289	0.0288089	0.700388	7.35274
215136_s_at	9.37e-05	0.00580951	-0.82331	8.0696
215191_at	7.15e-05	0.00503466	0.63189	4.77178
215285_s_at	0.000333467	0.011991	-0.538222	7.25087
215313_x_at	0.00114298	0.0239081	0.533447	10.6588
215464_s_at	0.000247868	0.0101131	0.661202	10.4237
215501_s_at	0.00360253	0.0469045	0.539028	6.80384
215509_s_at	0.00269789	0.0395504	-0.729858	7.26167
215537_x_at	0.000430782	0.0137486	-0.659031	9.33304
215635_at	0.00316115	0.043169	0.574035	5.15218
215719_x_at	7.23e-07	0.000503669	2.95016	6.06512
215747_s_at	0.000621013	0.0169538	-0.513558	9.367
215773_x_at	0.000175628	0.00843202	-0.659447	9.3913
215785_s_at	1.3e-07	0.000238009	1.22703	8.16916
215812_s_at	0.0012783	0.0255625	0.769318	8.89372
215854_at	6.32e-05	0.00472689	0.730331	5.8832
215891_s_at	0.000344658	0.0120983	0.566734	6.87979
215942_s_at	0.00100056	0.0223791	-0.825724	6.78318
216048_s_at	0.00214833	0.0348315	-0.560618	10.4051
216105_x_at	0.000243426	0.0100117	-0.504023	9.65661
216211_at	1.36e-05	0.00215969	0.805583	7.07014
216228_s_at	0.00047499	0.0145326	-0.665666	5.84544
216231_s_at	0.000668338	0.0176846	0.69399	11.8549
216237_s_at	0.000689874	0.0179537	-0.828555	9.22593
216252_x_at	7.82e-07	0.000528061	2.82973	6.90415
216268_s_at	0.000242236	0.00999315	0.853733	6.43359
216396_s_at	1.94e-05	0.00252804	1.14188	10.1479
216526_x_at	0.000161601	0.00803571	0.734816	10.375
216607_s_at	0.00291725	0.041262	-0.622968	10.043
216641_s_at	0.000235812	0.00981287	-0.64154	8.43115
216675_at	1.32e-06	0.000669671	1.05793	8.68145
216867_s_at	0.000861288	0.0204988	0.640605	8.1208
216870_x_at	0.00281793	0.0403322	-0.529336	5.49258
216952_s_at	1.88e-05	0.00247408	-0.69978	9.17494
216959_x_at	0.000394638	0.0131804	-0.747786	8.74859
216988_s_at	0.000100687	0.00606218	-0.572057	10.6488
217010_s_at	8.95e-05	0.00567792	-0.614195	6.45265
217019_at	0.000383141	0.0129126	0.617955	5.60721
217025_s_at	0.000487826	0.0147253	-0.58884	8.92947
217028_at	0.000241027	0.00996171	0.979116	6.80417
217299_s_at	0.000108108	0.00639663	-0.903673	8.17814
217373_x_at	1.87e-06	0.000782329	1.08106	8.18425
217403_s_at	0.000372863	0.0127672	-0.622008	5.46781
217420_s_at	0.00214521	0.0348061	0.737013	7.02378
217475_s_at	0.000119235	0.00677604	1.28834	7.51559
217542_at	3.72e-06	0.001158	0.842909	5.9818
217610_at	0.000456416	0.0142355	0.606101	8.32974
217640_x_at	0.00216578	0.0349579	-0.633967	4.75583
217644_s_at	0.000662907	0.0176435	0.567833	6.93173
217678_at	0.00397504	0.0495257	-0.691331	5.57625
217684_at	0.000192356	0.00885354	0.547449	7.34599
217783_s_at	0.000268556	0.010531	0.902686	9.63242
217833_at	0.000922567	0.0213195	-0.66642	8.37504
217844_at	0.000514822	0.015312	-0.706448	9.99668
217906_at	0.000135468	0.00727188	0.626846	10.6663
217914_at	0.000417257	0.0135499	0.502531	8.87216
217946_s_at	6.14e-05	0.00465284	-0.56616	10.4891
217974_at	0.000138713	0.0073574	0.599559	7.52542
217996_at	1.28e-05	0.00211841	-0.898973	7.25808
217997_at	4.81e-05	0.00402931	-1.18937	6.43329
218007_s_at	2.94e-06	0.000988761	1.20523	12.1087
218009_s_at	3.02e-06	0.000988761	-1.01043	10.7489
218014_at	6.18e-05	0.00466442	-0.570134	9.58142
218027_at	3.71e-05	0.00354906	-0.684813	9.44396
218069_at	0.00173334	0.0304687	-0.512008	11.6006
218080_x_at	0.000122221	0.00688161	-0.559621	8.84204
218112_at	0.000185489	0.00872436	-0.559721	9.80288
218124_at	2.37e-05	0.00284113	0.797668	8.17156
218129_s_at	0.00266137	0.0392972	0.635423	7.72103
218157_x_at	0.000117994	0.00672265	0.58519	11.2884
218176_at	0.000202035	0.00907405	-0.574393	9.16187
218180_s_at	0.0006946	0.0180008	0.607086	9.13834
218183_at	0.000389529	0.0130293	0.623425	5.88698
218189_s_at	0.000764874	0.0189745	-0.62528	9.90699
218192_at	4.77e-05	0.00400986	0.606943	8.82692
218196_at	5.06e-05	0.00415732	0.812271	8.09736
218205_s_at	9.58e-05	0.00586566	0.558406	9.49899
218237_s_at	0.00086062	0.0204988	-0.647416	11.8042
218288_s_at	0.000345403	0.0120983	0.555042	10.1564
218308_at	0.00110256	0.0235041	-0.620129	8.56979
218346_s_at	1e-08	5.59e-05	1.69192	9.01648
218349_s_at	0.000123872	0.00689749	-0.842823	8.45683
218350_s_at	8.1e-05	0.00538422	-0.666364	8.90659
218355_at	5.23e-05	0.00426803	-0.97088	8.5435
218384_at	0.00142143	0.027118	-0.516491	10.1933
218399_s_at	9.92e-05	0.00600213	-0.527876	9.79105
218403_at	3.76e-05	0.00356814	0.803643	10.3563
218412_s_at	4.3e-05	0.00379742	-0.690372	8.81012
218424_s_at	0.000553509	0.0159722	0.652213	8.37398
218435_at	0.000464803	0.0143612	-0.717718	10.3574
218471_s_at	0.000198634	0.00899794	0.594084	8.04014
218480_at	6.97e-05	0.00497596	0.724258	8.10308
218510_x_at	0.000952924	0.0217972	-0.542879	7.5209
218532_s_at	4.07e-05	0.00374516	-0.85184	6.04002
218535_s_at	7.23e-05	0.0050534	-0.704708	7.99814
218536_at	0.000947059	0.0217726	0.544281	7.30765
218542_at	0.00107883	0.0231532	-0.746351	8.68147
218545_at	6.31e-05	0.00472689	-0.614787	5.54971
218553_s_at	0.00113712	0.0238639	-0.646279	7.94087
218559_s_at	2.33e-06	0.000878057	1.21699	8.62251
218564_at	2.42e-05	0.00285714	-0.886052	8.97084
218585_s_at	0.000251501	0.0101694	-0.610881	7.38868
218611_at	1.38e-05	0.00215969	1.35711	9.79097
218627_at	0.00207415	0.0341168	0.843397	8.99787
218631_at	0.000863821	0.0205372	0.613282	9.38718
218634_at	4.92e-05	0.00407621	0.788994	9.73056
218662_s_at	0.000186309	0.00872436	-0.721656	7.24462
218663_at	2.87e-05	0.00311505	-1.02091	6.89996
218704_at	5.29e-06	0.00140264	-1.14112	8.22539
218726_at	0.00016207	0.00804107	-0.745596	8.82541
218729_at	0.00340883	0.0452284	-1.24106	10.343
218734_at	5.62e-05	0.00448581	-0.756156	9.21009
218755_at	2.76e-05	0.00307835	-1.71327	8.71972
218756_s_at	0.00172995	0.0304649	0.700076	6.62275
218769_s_at	4.43e-06	0.00123328	1.32578	7.57902
218782_s_at	1.03e-05	0.00194042	-0.836229	9.45626
218788_s_at	0.000683619	0.0179152	-0.592598	8.41378
218800_at	0.000399751	0.013281	-0.509579	4.33754
218816_at	0.000607106	0.0167798	-0.567369	8.17197
218820_at	0.00207668	0.0341168	0.532511	9.0209
218840_s_at	0.000819504	0.0198829	0.509399	8.54079
218853_s_at	0.000449116	0.0141313	0.663763	8.8278
218866_s_at	0.000181682	0.00861132	-0.755559	10.0754
218875_s_at	1.8e-05	0.00245029	-0.876233	7.62707
218885_s_at	0.000855923	0.0204572	-0.63505	6.79021
218886_at	0.000176061	0.00843464	-0.692179	6.88883
218911_at	5.93e-05	0.00456979	-0.793151	6.16982
218941_at	0.000235417	0.00981287	-0.529312	8.4073
218970_s_at	3.65e-06	0.001158	-1.00031	7.39613
218974_at	3.68e-05	0.00354906	-0.659661	6.92744
218984_at	0.00137146	0.0265522	-0.586301	8.87921
219020_at	9.99e-05	0.00602931	0.549905	9.05436
219037_at	5.33e-05	0.00430531	-0.90338	7.74376
219038_at	0.000205553	0.00915819	1.20583	7.73007
219050_s_at	0.000882535	0.0208045	-0.504699	7.68008
219077_s_at	8.15e-05	0.00540328	-0.963917	8.95256
219090_at	0.00389202	0.0490843	-0.969056	9.09216
219099_at	5.06e-07	0.000433422	1.89738	9.20731
219148_at	0.000432221	0.0137551	-1.04233	8.85672
219151_s_at	2.26e-05	0.00274878	0.796639	6.35067
219152_at	0.00142596	0.0271738	-0.529646	6.99749
219154_at	0.000173374	0.00837233	0.532826	7.61235
219161_s_at	0.000486322	0.0146999	-0.640909	7.97918
219201_s_at	0.00173475	0.0304687	-0.643605	6.49171
219212_at	0.00165689	0.0294813	-0.522405	8.40206
219229_at	0.00113795	0.0238639	-0.639183	6.77714
219236_at	9.36e-05	0.00580951	0.696989	8.19259
219258_at	1.4e-06	0.000669671	-1.44477	7.30106
219306_at	0.000497297	0.0149102	-0.727274	6.85283
219335_at	0.000344602	0.0120983	-0.514747	6.61784
219342_at	7.15e-06	0.00161848	1.06554	7.54474
219361_s_at	1.81e-05	0.00245029	0.881444	9.45456
219423_x_at	0.000556296	0.0160111	-0.592728	5.93216
219470_x_at	0.0018449	0.0316876	0.665117	7.21632
219494_at	0.000143121	0.00737807	-0.737197	7.69738
219502_at	0.000166777	0.00816517	-0.658909	7.10058
219512_at	1.24e-05	0.00209243	-0.764262	6.61724
219518_s_at	0.00047501	0.0145326	0.80904	7.42267
219544_at	1.09e-05	0.0019996	-1.01273	7.01028
219553_at	0.000408852	0.0134469	-0.613429	7.28823
219560_at	0.00134667	0.0262806	0.534039	8.26472
219581_at	0.0012188	0.0248783	-0.71066	6.43307
219583_s_at	0.000412511	0.0134484	0.709261	6.0151
219627_at	1.43e-05	0.00215969	0.74211	7.83578
219628_at	4.3e-06	0.00121307	1.2075	8.17461
219650_at	7e-05	0.00498386	-0.925865	6.25308
219680_at	0.000624929	0.0169982	0.501537	8.01042
219688_at	0.00118867	0.0245217	0.859325	4.9595
219720_s_at	0.0003356	0.011991	0.648747	7.5308
219785_s_at	0.000160902	0.00803571	-0.516755	6.1067
219787_s_at	0.0015014	0.0279421	-0.626028	8.47107
219860_at	0.000410883	0.0134469	-0.509362	6.73541
219918_s_at	5.22e-06	0.00140058	-1.25105	8.24937
219922_s_at	0.0022862	0.0361496	-0.562675	9.04276
219928_s_at	8.41e-06	0.00172007	0.918594	7.12865
219932_at	0.000212375	0.0093058	-0.637184	7.84445
219936_s_at	1.3e-07	0.000238009	2.97873	7.49032
219938_s_at	0.000538164	0.0157497	0.589082	4.91728
219978_s_at	0.00178538	0.0310783	-0.60296	9.78384
219990_at	3.27e-07	0.000378183	-1.47251	6.62084
220052_s_at	0.000141674	0.00737634	0.544072	9.02216
220192_x_at	0.000124526	0.00689749	-0.74236	9.52907
220212_s_at	0.00137578	0.0265583	-0.705611	8.19442
220225_at	0.00103747	0.0227702	-0.915501	7.36112
220233_at	9.93e-06	0.00190561	-0.725938	7.70871
220295_x_at	3.46e-05	0.00345643	-1.11584	7.45359
220311_at	6.53e-05	0.00477632	-0.653679	6.13378
220334_at	0.0016932	0.0300505	-0.531934	7.12087
220441_at	9.39e-05	0.00580951	-1.09979	7.90241
220488_s_at	0.00281121	0.0403254	-0.508871	12.9011
220500_s_at	0.000112979	0.00653536	0.626003	6.7874
220582_at	3.32e-05	0.00336459	0.779277	5.28265
220651_s_at	1.67e-06	0.000744928	-1.05017	8.10694
220761_s_at	0.00204279	0.0339164	-0.582442	7.58473
220770_s_at	0.00118021	0.0244118	-0.548622	6.75734
220840_s_at	0.000298983	0.0112508	-0.717522	6.78261
220911_s_at	0.00269381	0.0395504	0.515833	7.0982
220999_s_at	5.54e-07	0.000457319	1.01341	8.25979
221006_s_at	0.000427838	0.0137136	0.502326	9.02068
221020_s_at	0.00265166	0.0392972	-0.575808	8.3942
221045_s_at	0.000124195	0.00689749	-0.655981	6.53684
221050_s_at	0.000176772	0.00845055	-0.745722	8.05805
221058_s_at	0.000696237	0.0180008	-0.625905	7.20512
221139_s_at	9.34e-07	0.000578188	0.920702	7.98764
221191_at	0.000139233	0.0073574	0.531957	7.76689
221222_s_at	7.41e-05	0.00514438	0.675942	8.14206
221258_s_at	0.000126979	0.00697212	-0.688903	5.94488
221260_s_at	1.32e-05	0.00212508	0.80573	8.22061
221268_s_at	2.57e-05	0.00295023	0.975149	7.95881
221280_s_at	0.000422599	0.0136044	-0.527064	6.44383
221311_x_at	0.000408704	0.0134469	-0.533243	8.55269
221326_s_at	0.000204242	0.00913634	-0.652979	8.78839
221399_at	0.00219034	0.0351544	0.574807	7.68138
221436_s_at	0.000640235	0.0172879	-0.699607	8.13635
221481_x_at	2.88e-06	0.000986461	-1.41596	10.6838
221485_at	7.13e-05	0.00503466	0.622389	8.40439
221500_s_at	1.81e-05	0.00245029	0.664889	11.2262
221510_s_at	3.3e-05	0.00335203	1.07211	6.98181
221521_s_at	0.000211719	0.0093058	-0.795907	10.3554
221561_at	0.00070715	0.0181253	-0.533936	5.57174
221566_s_at	0.00133895	0.0262106	-0.568985	7.25698
221577_x_at	0.000137052	0.0073392	1.6684	9.94937
221582_at	9.54e-05	0.00586566	0.778841	10.7256
221591_s_at	0.000696533	0.0180008	-0.764394	8.67719
221601_s_at	0.00308355	0.0426897	0.569709	7.34117
221625_at	0.00144753	0.0274206	0.541657	5.5037
221638_s_at	4e-05	0.00371758	0.671518	8.62097
221640_s_at	1.28e-05	0.00211841	0.955577	6.89064
221652_s_at	0.000224786	0.00957682	-0.684802	8.64554
221665_s_at	0.00016502	0.00813306	-0.556567	7.8718
221703_at	0.000966965	0.0220121	-0.821108	8.84666
221746_at	0.000103358	0.00620621	-0.61987	9.17901
221755_at	0.000355152	0.0123428	-0.554229	7.31832
221763_at	7.54e-06	0.00164745	-0.913976	6.13037
221773_at	0.000584867	0.0164649	-0.555245	5.53462
221824_s_at	2.18e-05	0.00269176	1.00445	7.27615
221865_at	0.00263588	0.0392247	-0.593953	7.04636
221884_at	7.91e-05	0.00534235	-1.48594	6.08769
221887_s_at	0.000479302	0.0146066	0.596948	8.51103
221922_at	0.000544951	0.0158452	-0.705857	8.61392
221931_s_at	2.67e-05	0.00302951	-0.777085	7.76051
221946_at	4.22e-05	0.00378926	-0.629631	7.85153
221959_at	0.00300769	0.0420267	-0.693528	7.72311
221962_s_at	0.000335274	0.011991	0.50132	9.30304
221976_s_at	5.92e-05	0.00456979	-0.648041	7.17281
222001_x_at	5.74e-05	0.00453049	-0.640382	7.75517
222028_at	0.000571028	0.0162666	-0.607952	6.66125
222031_at	0.000373617	0.0127672	0.834523	5.37605
222037_at	0.000620325	0.0169538	-0.614108	9.13132
222075_s_at	4.99e-05	0.00411681	0.680849	7.40598
222077_s_at	0.000684376	0.0179152	-0.749317	10.0494
222087_at	6.06e-06	0.00146673	0.789014	7.42308
222118_at	0.000116456	0.00669229	-0.898848	8.48157
222152_at	0.000138443	0.0073574	0.51528	7.75284
222164_at	0.00182366	0.0314289	0.517043	6.63976
222208_s_at	0.000263132	0.0104165	0.584728	6.88897
222209_s_at	0.000341319	0.0120883	-0.938378	7.56056
222216_s_at	0.000198372	0.00899794	-0.518639	8.81052
222240_s_at	0.000269116	0.010531	0.701453	8.90485
222249_at	0.000844676	0.0202792	0.507857	4.81335
222250_s_at	0.000197142	0.00899794	-0.529534	7.35003
222270_at	0.000509391	0.0152114	-0.795122	4.25067
222284_at	4.11e-05	0.0037493	0.621033	6.83242
222369_at	6.21e-06	0.00147294	-0.963413	7.61858
222380_s_at	0.000401225	0.013281	0.712349	8.53766
31845_at	0.00247269	0.0378325	-0.641757	9.03106
33322_i_at	0.00261874	0.0391528	0.844735	12.7322
33323_r_at	0.0018245	0.0314289	1.01793	11.6291
34726_at	0.00057374	0.0162666	-0.589088	8.26229
35148_at	0.000263254	0.0104165	-0.509263	7.3676
36564_at	1.12e-05	0.0019996	0.694238	8.80819
36711_at	0.00185053	0.0317226	0.806286	4.34849
37590_g_at	0.000145606	0.00745668	0.535043	7.56508
38158_at	0.000592972	0.0165742	-0.544116	9.40565
41037_at	0.000801503	0.0195351	-0.530303	6.62461
45653_at	0.000173205	0.00837233	0.534732	9.03536
47553_at	0.000985743	0.0222261	0.767223	7.14605
54632_at	0.00071705	0.0182348	-0.76908	8.08041
56256_at	0.00152347	0.0281879	0.526368	8.38747
57588_at	0.00310543	0.0428092	-0.889724	8.06279
59437_at	0.00011656	0.00669229	-0.658645	7.35162
59625_at	0.000185844	0.00872436	-0.639401	7.41004
60815_at	9.37e-05	0.00580951	0.721081	7.21125
81811_at	5.28e-05	0.00428901	0.648138	8.18992
91816_f_at	4.02e-05	0.00371758	-0.73732	9.3274
91826_at	0.000480922	0.014616	-0.504188	8.46007
AFFX-M27830_5_at	0.00119311	0.0245522	-0.876858	10.5023

## Sheet: Table S4.DExplore-GEO2R_all
Supplementary Table S4. List of all DEGs detected by both DExplore and GEO2R
Legend: probeID, the ID of the probe for GPL571 ([HG-U133A_2] Affymetrix Human Genome U133A 2.0 Array); gene symbol, the gene symbol from the NCBI's Gene database
probeID	gene.symbol
202240_at	PLK1
205303_at	KCNJ8
207813_s_at	FDXR
218346_s_at	SESN1
205436_s_at	H2AX
203409_at	DDB2
209294_x_at	TNFRSF10B
206140_at	LHX2
200974_at	ACTA2
202393_s_at	KLF10
202899_s_at	SRSF3
203335_at	PHYH
203764_at	DLGAP5
204780_s_at	FAS
204962_s_at	CENPA
209375_at	XPC
209642_at	BUB1
215785_s_at	CYFIP2
218007_s_at	RPS27L
218769_s_at	ANKRA2
203418_at	CCNA2
205046_at	CENPE
218704_at	RNF43
218755_at	KIF20A
220651_s_at	MCM10
201060_x_at	STOM
209431_s_at	PATZ1
219099_at	TIGAR
220441_at	DNAJC22
200671_s_at	SPTBN1
204244_s_at	DBF4
201896_s_at	PSRC1
204822_at	TTK
205756_s_at	F8
207828_s_at	CENPF
209891_at	SPC25
210052_s_at	TPX2
210166_at	TLR5
210609_s_at	TP53I3
218355_at	KIF4A
219544_at	BORA
219936_s_at	GPR87
219990_at	E2F8
202672_s_at	ATF3
201993_x_at	HNRNPDL
206222_at	TNFRSF10C
208796_s_at	CCNG1
208033_s_at	ZFHX3
221139_s_at	CSAD
203666_at	CXCL12
204566_at	PPM1D
204825_at	MELK
207332_s_at	TFRC
218009_s_at	PRC1
200073_s_at	HNRNPD
200730_s_at	PTP4A1
201294_s_at	WSB1
202107_s_at	MCM2
202307_s_at	TAP1
204066_s_at	AGAP1
209075_s_at	ISCU
212993_at	NACC2
219258_at	TIPIN
219628_at	ZMAT3
203972_s_at	PEX3
204315_s_at	GTSE1
201930_at	MCM6
203625_x_at	SKP2
202870_s_at	CDC20
218611_at	IER5
203721_s_at	UTP18
203887_s_at	THBD
208478_s_at	BAX
211042_x_at	MCAM
203725_at	GADD45A
213222_at	PLCB1
219148_at	PBK
200771_at	LAMC1
207695_s_at	IGSF1
212378_at	GART
213188_s_at	RIOX2
219918_s_at	ASPM
219928_s_at	CABYR
200904_at	HLA-E
201891_s_at	B2M
202017_at	EPHX1
205531_s_at	GLS2
221824_s_at	MARCHF8
218634_at	PHLDA3
202954_at	UBE2C
203276_at	LMNB1
203455_s_at	SAT1
205266_at	LIF
205345_at	BARD1
207165_at	HMMR
210779_x_at	GEMIN2
215068_s_at	FBXL18
218559_s_at	MAFB
218970_s_at	CUTC
219361_s_at	AEN
211715_s_at	BDH1
222087_at	PVT1
219518_s_at	ELL3
208795_s_at	MCM7
214537_at	H1-3
214746_s_at	ZNF467
219342_at	CASD1
202779_s_at	UBE2S
204827_s_at	CCNF
206364_at	KIF14
209189_at	FOS
209449_at	LSM2
211832_s_at	MDM2
212875_s_at	C2CD2
215136_s_at	EXOSC8
217996_at	PHLDA1
218124_at	RETSAT
220233_at	FBXO17
206247_at	MICB
203062_s_at	MDC1
202464_s_at	PFKFB3
202705_at	CCNB2
203159_at	GLS
203362_s_at	MAD2L1
208814_at	HSPA4
209025_s_at	SYNCRIP
210933_s_at	FSCN1
212111_at	STX12
218412_s_at	GTF2IRD1
218480_at	AGBL5
218782_s_at	ATAD2
221591_s_at	PIMREG
221640_s_at	PIDD1
203420_at	FAM8A1
206102_at	GINS1
209714_s_at	CDKN3
220295_x_at	DEPDC1
202284_s_at	CDKN1A
204146_at	RAD51AP1
212403_at	UBE3B
213017_at	ABHD3
218662_s_at	NCAPG
204957_at	ORC5
209421_at	MSH2
205862_at	GREB1
217844_at	CTDSP1
202330_s_at	UNG
207501_s_at	FGF12
204023_at	RFC4
205167_s_at	CDC25C
219512_at	DSN1
218542_at	CEP55
204162_at	NDC80
205053_at	PRIM1
212992_at	AHNAK2
206108_s_at	SRSF6
204641_at	NEK2
221268_s_at	SGPP1
201555_at	MCM3
204274_at	EBAG9
204709_s_at	KIF23
210778_s_at	MXD4
212955_s_at	POLR2I
222077_s_at	RACGAP1
208289_s_at	EI24
212977_at	ACKR3
207017_at	RAB27B
209048_s_at	ZMYND8
213302_at	PFAS
202153_s_at	NUP62
204958_at	PLK3
212543_at	CRYBG1
212885_at	MPHOSPH10
216952_s_at	LMNB2
221931_s_at	SEH1L
212949_at	NCAPH
219627_at	ZNF767P
212510_at	GPD1L
220840_s_at	C1orf112
206052_s_at	SLBP
203755_at	BUB1B
201235_s_at	BTG2
203282_at	GBE1
207574_s_at	GADD45B
209464_at	AURKB
206858_s_at	HOXC6
221260_s_at	CSRNP2
218875_s_at	FBXO5
201478_s_at	DKC1
218349_s_at	ZWILCH
214670_at	ZKSCAN1
202806_at	DBN1
221959_at	FAM110B
216211_at	TASOR2
218734_at	NAA40
203836_s_at	MAP3K5
204805_s_at	H1-10
204092_s_at	AURKA
206103_at	RAC3
209776_s_at	SLC19A1
220212_s_at	THADA
221222_s_at	C1orf56
221485_at	B4GALT5
206928_at	ZNF124
208765_s_at	HNRNPR
209674_at	CRY1
213338_at	TMEM158
201663_s_at	SMC4
203976_s_at	CHAF1A
210028_s_at	ORC3
208758_at	ATIC
203405_at	PSMG1
200892_s_at	TRA2B
205060_at	PARG
208616_s_at	PTP4A2
203967_at	CDC6
204999_s_at	ATF5
205286_at	TFAP2C
208787_at	MRPL3
210312_s_at	IFT20
206533_at	CHRNA5
201301_s_at	ANXA4
211316_x_at	CFLAR
212966_at	HIC2
203499_at	EPHA2
201579_at	FAT1
202693_s_at	STK17A
204284_at	PPP1R3C
204444_at	KIF11
219502_at	NEIL3
200753_x_at	SRSF2
205792_at	CCN5
202326_at	EHMT2
208553_at	H1-4
217974_at	TM7SF3
218350_s_at	GMNN
218974_at	SOBP
221746_at	UBL4A
222075_s_at	OAZ3
202206_at	ARL4C
212799_at	STX6
219236_at	PAQR6
202484_s_at	MBD2
206499_s_at	RCC1
204484_at	PIK3C2B
202848_s_at	GRK6
204857_at	MAD1L1
203343_at	UGDH
213883_s_at	TM2D1
218564_at	RFWD3
213391_at	DPY19L4
207357_s_at	GALNT10
213038_at	RNF19B
221500_s_at	STX16
201867_s_at	TBL1X
221946_at	PIERCE1
91816_f_at	MEX3D
213195_at	LYRM9
219038_at	MORC4
201697_s_at	DNMT1
202251_at	PRPF3
204039_at	CEBPA
213005_s_at	KANK1
221045_s_at	PER3
212137_at	LARP1
209408_at	KIF2C
208510_s_at	PPARG
205339_at	STIL
201690_s_at	TPD52
208900_s_at	TOP1
209681_at	SLC19A2
218196_at	OSTM1
218237_s_at	SLC38A1
218535_s_at	RIOK2
202183_s_at	KIF22
202911_at	MSH6
203145_at	SPAG5
204969_s_at	RDX
221436_s_at	CDCA3
200790_at	ODC1
221665_s_at	EPS8L1
203987_at	FZD6
204835_at	POLA1
202211_at	ARFGAP3
218816_at	LRRC1
204203_at	CEBPG
209099_x_at	JAG1
209119_x_at	NR2F2
211899_s_at	TRAF4
214710_s_at	CCNB1
202432_at	PPP3CB
203006_at	INPP5A
208156_x_at	EPPK1
201742_x_at	SRSF1
209899_s_at	PUF60
200897_s_at	PALLD
203542_s_at	KLF9
203782_s_at	POLRMT
209175_at	SEC23IP
214760_at	ZNF337
206205_at	MPHOSPH9
200687_s_at	SF3B3
204059_s_at	ME1
212445_s_at	NEDD4L
204977_at	DDX10
210278_s_at	AP4S1
209520_s_at	NCBP1
208822_s_at	DAP3
201129_at	SRSF7
218192_at	IP6K2
212761_at	TCF7L2
218536_at	MRS2
210074_at	CTSV
212215_at	PREPL
218553_s_at	KCTD15
219494_at	RAD54B
203287_at	LAD1
208875_s_at	PAK2
213115_at	ATG4A
222250_s_at	INTS7
202691_at	SNRPD1
205160_at	PEX11A
218014_at	NUP85
218027_at	MRPL15
220052_s_at	TINF2
204285_s_at	PMAIP1
37590_g_at	ZNF710-AS1
202722_s_at	GFPT1
219922_s_at	LTBP3
205356_at	USP13
204752_x_at	PARP2
208922_s_at	NXF1
221755_at	EHBP1L1
206929_s_at	NFIC
200037_s_at	CBX3
203565_s_at	MNAT1
205858_at	NGFR
217906_at	KLHDC2
202094_at	BIRC5
214794_at	PA2G4
202431_s_at	MYC
204612_at	PKIA
205543_at	HSPA4L
210947_s_at	MSH3
212334_at	GNS
218205_s_at	MKNK2
203284_s_at	HS2ST1
208165_s_at	PRSS16
204651_at	NRF1
205187_at	SMAD5
208956_x_at	DUT
206723_s_at	LPAR2
206566_at	SLC7A1
212745_s_at	BBS4
203303_at	DYNLT3
221521_s_at	GINS2
204126_s_at	CDC45
204975_at	EMP2
205024_s_at	RAD51
218288_s_at	CCDC90B
201041_s_at	DUSP1
200749_at	RAN
208991_at	STAT3
214138_at	ZNF79
218403_at	TRIAP1
205282_at	LRP8
205292_s_at	HNRNPA2B1
215084_s_at	LRRC42
218112_at	MRPS34
218399_s_at	CDCA4
208659_at	CLIC1
207688_s_at	INHBC
212093_s_at	MTUS1
220225_at	IRX4
205253_at	PBX1
209006_s_at	RSRP1
201385_at	DHX15
212462_at	KAT6B
213923_at	RAP2B
219050_s_at	ZNHIT2
221582_at	H2AC25
212973_at	RPIA
205596_s_at	SMURF2
201020_at	YWHAH
214030_at	CRYBG3
212160_at	XPOT
209917_s_at	TP53TG1
209832_s_at	CDT1
217610_at	SPDYE2
219152_at	PODXL2
222152_at	PDCD6
214755_at	UAP1L1
205034_at	CCNE2
208313_s_at	SF1
217946_s_at	SAE1
219037_at	RRP15
218627_at	DRAM1
212463_at	CD59
213427_at	RPP40
209201_x_at	CXCR4
211763_s_at	UBE2B
214404_x_at	SPDEF
219860_at	LY6G5C
205093_at	PLEKHA6
218176_at	MAGEF1
219932_at	SLC27A6
201300_s_at	PRNP
202725_at	POLR2A
206043_s_at	ATP2C2
208793_x_at	SMARCA4
219020_at	HS1BP3
204990_s_at	ITGB4
209998_at	PIGO
219077_s_at	WWOX
210362_x_at	PML
202659_at	PSMB10
213677_s_at	PMS1
219154_at	TMEM120B
202181_at	SUSD6
214474_at	PRKAB2
204817_at	ESPL1
216867_s_at	PDGFA
221962_s_at	UBE2H
201972_at	ATP6V1A
212436_at	TRIM33
219787_s_at	ECT2
218471_s_at	BBS1
203035_s_at	PIAS3
201773_at	ADNP
208926_at	NEU1
214658_at	TMED7
221311_x_at	LYRM2
202450_s_at	CTSK
218308_at	TACC3
203973_s_at	CEBPD
210117_at	SPAG1
218080_x_at	FAF1
200993_at	IPO7
214500_at	MACROH2A1
222208_s_at	POLR2J4
213632_at	DHODH
203978_at	NUBP1
222216_s_at	MRPL17
209526_s_at	HDGFL3
203344_s_at	RBBP8
207124_s_at	GNB5
210827_s_at	ELF3
212512_s_at	CARM1
201054_at	HNRNPA0
204633_s_at	RPS6KA5
209692_at	EYA2
209711_at	SLC35D1
218941_at	FBXW2
209667_at	CES2
202794_at	INPP1
212846_at	RRP1B
212030_at	RBM25
205110_s_at	FGF13
221050_s_at	GTPBP2
204417_at	GALC
209617_s_at	CTNND2
45653_at	KCTD13
202905_x_at	NBN
203806_s_at	FANCA
202589_at	TYMS
203201_at	PMM2
210389_x_at	TUBD1
208812_x_at	HLA-C
212020_s_at	MKI67
205769_at	SLC27A2
220911_s_at	NYNRIN
222118_at	CENPN
201202_at	PCNA
201361_at	TMEM109
213912_at	TBC1D30
215285_s_at	PHTF1
219306_at	KIF15
222209_s_at	TMEM135
201718_s_at	EPB41L2
204420_at	FOSL1
204224_s_at	GCH1
212722_s_at	JMJD6
201313_at	ENO2
218157_x_at	CDC42SE1
203906_at	IQSEC1
201443_s_at	ATP6AP2
201755_at	MCM5
203123_s_at	SLC11A2
219553_at	NME7
218726_at	HJURP
205440_s_at	NPY1R
202193_at	LIMK2
203270_at	DTYMK
217914_at	TPCN1
202650_s_at	TMEM94
213844_at	HOXA5
219680_at	NLRX1
219720_s_at	GPATCH2L
202219_at	SLC6A8
205031_at	EFNB3
209026_x_at	TUBB
207590_s_at	CENPI
203588_s_at	TFDP2
221006_s_at	SNX27
212563_at	BOP1
221577_x_at	GDF15
209345_s_at	PI4K2A
218384_at	CARHSP1
204478_s_at	RABIF
205500_at	C5
210774_s_at	NCOA4
215891_s_at	GM2A
204250_s_at	CEP164
212660_at	JADE2
221865_at	TMEM268
202425_x_at	PPP3CA
203432_at	TMPO
204299_at	SRSF10
205240_at	GPSM2
210791_s_at	ARHGAP32
200965_s_at	ABLIM1
203855_at	WDR47
218866_s_at	POLR3K
222240_s_at	ISYNA1
204941_s_at	ALDH3B2
209260_at	SFN
218853_s_at	MOSPD1
201739_at	SGK1
209151_x_at	TCF3
210001_s_at	SOCS1
212858_at	PAQR4
34726_at	CACNB3
204240_s_at	SMC2
205613_at	SYT17
218886_at	PAK1IP1
217783_s_at	YPEL5
221601_s_at	FCMR
210220_at	FZD2
212835_at	ABRAXAS2
35148_at	TJP3
219335_at	ARMCX5
209482_at	POP7
202253_s_at	DNM2
201195_s_at	SLC7A5
202633_at	TOPBP1
206414_s_at	ASAP2
209155_s_at	NT5C2
203594_at	RTCA
210111_s_at	KLHDC10
204516_at	ATXN7
201937_s_at	DNPEP
212511_at	PICALM
200603_at	PRKAR1A
218788_s_at	SMYD3
206066_s_at	RAD51C
213308_at	SHANK2
207233_s_at	MITF
204379_s_at	FGFR3
202875_s_at	PBX2
202246_s_at	CDK4
206452_x_at	PTPA
213242_x_at	CEP170B
221652_s_at	INTS13
201578_at	PODXL
218585_s_at	DTL
201801_s_at	SLC29A1
209527_at	EXOSC2
208070_s_at	REV3L
218424_s_at	STEAP3
220488_s_at	BCAS3
218885_s_at	GALNT12
222028_at	ZNF45
201951_at	ALCAM
221058_s_at	CKLF
208829_at	TAPBP
211116_at	SLC9A2
201631_s_at	IER3
202599_s_at	NRIP1
202111_at	SLC4A2
219560_at	RTL10
201702_s_at	PPP1R10
204082_at	PBX3
204510_at	CDC7
218631_at	AVPI1
203503_s_at	PEX14
200617_at	MLEC
213874_at	SERPINA4
222164_at	FGFR1
204384_at	GOLGA2
213562_s_at	SQLE
212460_at	SPTSSA
202531_at	IRF1
206689_x_at	KAT5
209306_s_at	SWAP70
202293_at	STAG1
209184_s_at	IRS2
205135_s_at	NUFIP1
212720_at	PAPOLA
217644_s_at	SOS2
218756_s_at	DHRS11
204264_at	CPT2
207549_x_at	CD46
212079_s_at	KMT2A
218435_at	DNAJC15
221887_s_at	WHRN
221566_s_at	NOL3
221280_s_at	PARD3
204061_at	PRKX
213918_s_at	NIPBL
208753_s_at	NAP1L1
202606_s_at	TLK1
212730_at	SYNM
214696_at	MIR22HG
209488_s_at	RBPMS
204127_at	RFC3
202262_x_at	DDAH2
215313_x_at	HLA-A
205492_s_at	DPYSL4
200621_at	CSRP1
209610_s_at	SLC1A4
201286_at	SDC1
212037_at	PNN
215501_s_at	DUSP10
218729_at	LXN
201182_s_at	CHD4
201834_at	PRKAB1
201995_at	EXT1
208978_at	CRIP2
202741_at	PRKACB
203372_s_at	SOCS2
203690_at	TUBGCP3
201584_s_at	DDX39A
208729_x_at	HLA-B
202177_at	GAS6
203192_at	ABCB6
204623_at	TFF3
204970_s_at	MAFG
213076_at	ITPKC
202945_at	FPGS
218129_s_at	NFYB
203340_s_at	SLC25A12
208939_at	SEPHS1
207060_at	EN2
202271_at	FBXO28
204105_s_at	NRCAM
213149_at	DLAT
218180_s_at	EPS8L2
219978_s_at	NUSAP1
201927_s_at	PKP4
204531_s_at	BRCA1
204944_at	PTPRG
56256_at	SIDT2
201362_at	IVNS1ABP
219212_at	HSPA14
201014_s_at	PAICS
212141_at	MCM4
212281_s_at	TMEM97
212254_s_at	DST
213478_at	KAZN
219229_at	SLCO3A1
218840_s_at	NADSYN1
200934_at	DEK
221703_at	BRIP1
218984_at	PUS7
213326_at	VAMP1
205573_s_at	SNX7
207733_x_at	PSG9
203630_s_at	COG5
206280_at	CDH18
202625_at	LYN
204341_at	TRIM16
202983_at	HLTF
208767_s_at	LAPTM4B
212675_s_at	CEP68
201196_s_at	AMD1
41037_at	TEAD4
214718_at	GATAD1
218510_x_at	RETREG1
218189_s_at	NANS
212944_at	SLC5A3
212481_s_at	TPM4

## Sheet: Table S5.DExplore-GEO2R_down
Supplementary Table S5. List of downregulated DEGs detected by both DExplore and GEO2R
Legend: probeID, the ID of the probe for GPL571 ([HG-U133A_2] Affymetrix Human Genome U133A 2.0 Array); gene symbol, the gene symbol from the NCBI's Gene database
probeID	gene.symbol
202240_at	PLK1
205303_at	KCNJ8
205436_s_at	H2AX
206140_at	LHX2
202899_s_at	SRSF3
203764_at	DLGAP5
204962_s_at	CENPA
209642_at	BUB1
203418_at	CCNA2
205046_at	CENPE
218704_at	RNF43
218755_at	KIF20A
220651_s_at	MCM10
209431_s_at	PATZ1
220441_at	DNAJC22
200671_s_at	SPTBN1
204244_s_at	DBF4
201896_s_at	PSRC1
204822_at	TTK
207828_s_at	CENPF
209891_at	SPC25
210052_s_at	TPX2
218355_at	KIF4A
219544_at	BORA
219990_at	E2F8
201993_x_at	HNRNPDL
208033_s_at	ZFHX3
204825_at	MELK
218009_s_at	PRC1
200073_s_at	HNRNPD
202107_s_at	MCM2
204066_s_at	AGAP1
219258_at	TIPIN
203972_s_at	PEX3
204315_s_at	GTSE1
201930_at	MCM6
203625_x_at	SKP2
202870_s_at	CDC20
203721_s_at	UTP18
211042_x_at	MCAM
213222_at	PLCB1
219148_at	PBK
212378_at	GART
213188_s_at	RIOX2
219918_s_at	ASPM
202954_at	UBE2C
203276_at	LMNB1
205345_at	BARD1
207165_at	HMMR
210779_x_at	GEMIN2
218970_s_at	CUTC
211715_s_at	BDH1
208795_s_at	MCM7
214537_at	H1-3
214746_s_at	ZNF467
202779_s_at	UBE2S
204827_s_at	CCNF
206364_at	KIF14
209449_at	LSM2
212875_s_at	C2CD2
215136_s_at	EXOSC8
217996_at	PHLDA1
220233_at	FBXO17
203062_s_at	MDC1
202464_s_at	PFKFB3
202705_at	CCNB2
203362_s_at	MAD2L1
209025_s_at	SYNCRIP
218412_s_at	GTF2IRD1
218782_s_at	ATAD2
221591_s_at	PIMREG
206102_at	GINS1
209714_s_at	CDKN3
220295_x_at	DEPDC1
204146_at	RAD51AP1
218662_s_at	NCAPG
204957_at	ORC5
209421_at	MSH2
217844_at	CTDSP1
202330_s_at	UNG
207501_s_at	FGF12
204023_at	RFC4
205167_s_at	CDC25C
219512_at	DSN1
218542_at	CEP55
204162_at	NDC80
205053_at	PRIM1
206108_s_at	SRSF6
204641_at	NEK2
201555_at	MCM3
204274_at	EBAG9
204709_s_at	KIF23
212955_s_at	POLR2I
222077_s_at	RACGAP1
212977_at	ACKR3
207017_at	RAB27B
209048_s_at	ZMYND8
213302_at	PFAS
202153_s_at	NUP62
212543_at	CRYBG1
212885_at	MPHOSPH10
216952_s_at	LMNB2
221931_s_at	SEH1L
212949_at	NCAPH
220840_s_at	C1orf112
206052_s_at	SLBP
203755_at	BUB1B
209464_at	AURKB
206858_s_at	HOXC6
218875_s_at	FBXO5
201478_s_at	DKC1
218349_s_at	ZWILCH
202806_at	DBN1
221959_at	FAM110B
218734_at	NAA40
203836_s_at	MAP3K5
204805_s_at	H1-10
204092_s_at	AURKA
206103_at	RAC3
209776_s_at	SLC19A1
220212_s_at	THADA
208765_s_at	HNRNPR
201663_s_at	SMC4
203976_s_at	CHAF1A
210028_s_at	ORC3
208758_at	ATIC
203405_at	PSMG1
200892_s_at	TRA2B
208616_s_at	PTP4A2
203967_at	CDC6
208787_at	MRPL3
206533_at	CHRNA5
204284_at	PPP1R3C
204444_at	KIF11
219502_at	NEIL3
200753_x_at	SRSF2
202326_at	EHMT2
208553_at	H1-4
218350_s_at	GMNN
218974_at	SOBP
221746_at	UBL4A
202484_s_at	MBD2
206499_s_at	RCC1
204484_at	PIK3C2B
202848_s_at	GRK6
204857_at	MAD1L1
203343_at	UGDH
218564_at	RFWD3
213391_at	DPY19L4
207357_s_at	GALNT10
201867_s_at	TBL1X
221946_at	PIERCE1
91816_f_at	MEX3D
201697_s_at	DNMT1
202251_at	PRPF3
213005_s_at	KANK1
221045_s_at	PER3
212137_at	LARP1
209408_at	KIF2C
208510_s_at	PPARG
205339_at	STIL
201690_s_at	TPD52
218237_s_at	SLC38A1
218535_s_at	RIOK2
202183_s_at	KIF22
202911_at	MSH6
203145_at	SPAG5
204969_s_at	RDX
221436_s_at	CDCA3
221665_s_at	EPS8L1
204835_at	POLA1
218816_at	LRRC1
204203_at	CEBPG
209119_x_at	NR2F2
214710_s_at	CCNB1
203006_at	INPP5A
201742_x_at	SRSF1
209899_s_at	PUF60
200897_s_at	PALLD
203782_s_at	POLRMT
209175_at	SEC23IP
206205_at	MPHOSPH9
200687_s_at	SF3B3
204059_s_at	ME1
212445_s_at	NEDD4L
204977_at	DDX10
209520_s_at	NCBP1
208822_s_at	DAP3
201129_at	SRSF7
212761_at	TCF7L2
218553_s_at	KCTD15
219494_at	RAD54B
203287_at	LAD1
208875_s_at	PAK2
222250_s_at	INTS7
202691_at	SNRPD1
218014_at	NUP85
218027_at	MRPL15
202722_s_at	GFPT1
219922_s_at	LTBP3
205356_at	USP13
204752_x_at	PARP2
221755_at	EHBP1L1
206929_s_at	NFIC
200037_s_at	CBX3
203565_s_at	MNAT1
202094_at	BIRC5
202431_s_at	MYC
204612_at	PKIA
210947_s_at	MSH3
203284_s_at	HS2ST1
208165_s_at	PRSS16
204651_at	NRF1
208956_x_at	DUT
206723_s_at	LPAR2
206566_at	SLC7A1
221521_s_at	GINS2
204126_s_at	CDC45
204975_at	EMP2
205024_s_at	RAD51
200749_at	RAN
205282_at	LRP8
205292_s_at	HNRNPA2B1
215084_s_at	LRRC42
218112_at	MRPS34
218399_s_at	CDCA4
208659_at	CLIC1
207688_s_at	INHBC
212093_s_at	MTUS1
220225_at	IRX4
205253_at	PBX1
201385_at	DHX15
212462_at	KAT6B
219050_s_at	ZNHIT2
201020_at	YWHAH
214030_at	CRYBG3
212160_at	XPOT
209832_s_at	CDT1
219152_at	PODXL2
214755_at	UAP1L1
205034_at	CCNE2
208313_s_at	SF1
217946_s_at	SAE1
219037_at	RRP15
213427_at	RPP40
211763_s_at	UBE2B
214404_x_at	SPDEF
219860_at	LY6G5C
205093_at	PLEKHA6
218176_at	MAGEF1
219932_at	SLC27A6
206043_s_at	ATP2C2
208793_x_at	SMARCA4
204990_s_at	ITGB4
209998_at	PIGO
219077_s_at	WWOX
213677_s_at	PMS1
204817_at	ESPL1
212436_at	TRIM33
219787_s_at	ECT2
203035_s_at	PIAS3
201773_at	ADNP
221311_x_at	LYRM2
218308_at	TACC3
218080_x_at	FAF1
213632_at	DHODH
203978_at	NUBP1
222216_s_at	MRPL17
209526_s_at	HDGFL3
203344_s_at	RBBP8
207124_s_at	GNB5
212512_s_at	CARM1
201054_at	HNRNPA0
209692_at	EYA2
218941_at	FBXW2
212846_at	RRP1B
212030_at	RBM25
205110_s_at	FGF13
221050_s_at	GTPBP2
209617_s_at	CTNND2
202905_x_at	NBN
203806_s_at	FANCA
203201_at	PMM2
210389_x_at	TUBD1
212020_s_at	MKI67
205769_at	SLC27A2
222118_at	CENPN
201361_at	TMEM109
213912_at	TBC1D30
215285_s_at	PHTF1
219306_at	KIF15
222209_s_at	TMEM135
201718_s_at	EPB41L2
212722_s_at	JMJD6
201313_at	ENO2
203906_at	IQSEC1
201755_at	MCM5
219553_at	NME7
218726_at	HJURP
203270_at	DTYMK
205031_at	EFNB3
209026_x_at	TUBB
207590_s_at	CENPI
203588_s_at	TFDP2
212563_at	BOP1
218384_at	CARHSP1
204478_s_at	RABIF
205500_at	C5
212660_at	JADE2
221865_at	TMEM268
202425_x_at	PPP3CA
203432_at	TMPO
204299_at	SRSF10
205240_at	GPSM2
210791_s_at	ARHGAP32
200965_s_at	ABLIM1
218866_s_at	POLR3K
204941_s_at	ALDH3B2
209151_x_at	TCF3
212858_at	PAQR4
34726_at	CACNB3
204240_s_at	SMC2
218886_at	PAK1IP1
210220_at	FZD2
35148_at	TJP3
219335_at	ARMCX5
209482_at	POP7
202253_s_at	DNM2
202633_at	TOPBP1
206414_s_at	ASAP2
209155_s_at	NT5C2
203594_at	RTCA
201937_s_at	DNPEP
212511_at	PICALM
218788_s_at	SMYD3
213308_at	SHANK2
202875_s_at	PBX2
202246_s_at	CDK4
206452_x_at	PTPA
221652_s_at	INTS13
218585_s_at	DTL
201801_s_at	SLC29A1
209527_at	EXOSC2
220488_s_at	BCAS3
218885_s_at	GALNT12
222028_at	ZNF45
201951_at	ALCAM
221058_s_at	CKLF
211116_at	SLC9A2
202599_s_at	NRIP1
202111_at	SLC4A2
201702_s_at	PPP1R10
204082_at	PBX3
204510_at	CDC7
203503_s_at	PEX14
204384_at	GOLGA2
213562_s_at	SQLE
206689_x_at	KAT5
202293_at	STAG1
205135_s_at	NUFIP1
218435_at	DNAJC15
221566_s_at	NOL3
221280_s_at	PARD3
213918_s_at	NIPBL
202606_s_at	TLK1
209488_s_at	RBPMS
204127_at	RFC3
202262_x_at	DDAH2
200621_at	CSRP1
209610_s_at	SLC1A4
212037_at	PNN
218729_at	LXN
201182_s_at	CHD4
201995_at	EXT1
208978_at	CRIP2
202741_at	PRKACB
203372_s_at	SOCS2
203690_at	TUBGCP3
201584_s_at	DDX39A
202945_at	FPGS
203340_s_at	SLC25A12
208939_at	SEPHS1
204105_s_at	NRCAM
213149_at	DLAT
219978_s_at	NUSAP1
201927_s_at	PKP4
204531_s_at	BRCA1
204944_at	PTPRG
201362_at	IVNS1ABP
219212_at	HSPA14
201014_s_at	PAICS
212141_at	MCM4
212281_s_at	TMEM97
212254_s_at	DST
213478_at	KAZN
219229_at	SLCO3A1
200934_at	DEK
221703_at	BRIP1
218984_at	PUS7
205573_s_at	SNX7
203630_s_at	COG5
206280_at	CDH18
202625_at	LYN
204341_at	TRIM16
202983_at	HLTF
201196_s_at	AMD1
41037_at	TEAD4
218510_x_at	RETREG1
218189_s_at	NANS
212481_s_at	TPM4

## Sheet: Table S6.DExplore-GEO2R_up
Supplementary Table S6. List of upregulated DEGs detected by both DExplore and GEO2R
Legend: probeID, the ID of the probe for GPL571 ([HG-U133A_2] Affymetrix Human Genome U133A 2.0 Array); gene symbol, the gene symbol from the NCBI's Gene database
probeID	gene.symbol
207813_s_at	FDXR
218346_s_at	SESN1
203409_at	DDB2
209294_x_at	TNFRSF10B
200974_at	ACTA2
202393_s_at	KLF10
203335_at	PHYH
204780_s_at	FAS
209375_at	XPC
215785_s_at	CYFIP2
218007_s_at	RPS27L
218769_s_at	ANKRA2
201060_x_at	STOM
219099_at	TIGAR
205756_s_at	F8
210166_at	TLR5
210609_s_at	TP53I3
219936_s_at	GPR87
202672_s_at	ATF3
206222_at	TNFRSF10C
208796_s_at	CCNG1
221139_s_at	CSAD
203666_at	CXCL12
204566_at	PPM1D
207332_s_at	TFRC
200730_s_at	PTP4A1
201294_s_at	WSB1
202307_s_at	TAP1
209075_s_at	ISCU
212993_at	NACC2
219628_at	ZMAT3
218611_at	IER5
203887_s_at	THBD
208478_s_at	BAX
203725_at	GADD45A
200771_at	LAMC1
207695_s_at	IGSF1
219928_s_at	CABYR
200904_at	HLA-E
201891_s_at	B2M
202017_at	EPHX1
205531_s_at	GLS2
221824_s_at	MARCHF8
218634_at	PHLDA3
203455_s_at	SAT1
205266_at	LIF
215068_s_at	FBXL18
218559_s_at	MAFB
219361_s_at	AEN
222087_at	PVT1
219518_s_at	ELL3
219342_at	CASD1
209189_at	FOS
211832_s_at	MDM2
218124_at	RETSAT
206247_at	MICB
203159_at	GLS
208814_at	HSPA4
210933_s_at	FSCN1
212111_at	STX12
218480_at	AGBL5
221640_s_at	PIDD1
203420_at	FAM8A1
202284_s_at	CDKN1A
212403_at	UBE3B
213017_at	ABHD3
205862_at	GREB1
212992_at	AHNAK2
221268_s_at	SGPP1
210778_s_at	MXD4
208289_s_at	EI24
204958_at	PLK3
219627_at	ZNF767P
212510_at	GPD1L
201235_s_at	BTG2
203282_at	GBE1
207574_s_at	GADD45B
221260_s_at	CSRNP2
214670_at	ZKSCAN1
216211_at	TASOR2
221222_s_at	C1orf56
221485_at	B4GALT5
206928_at	ZNF124
209674_at	CRY1
213338_at	TMEM158
205060_at	PARG
204999_s_at	ATF5
205286_at	TFAP2C
210312_s_at	IFT20
201301_s_at	ANXA4
211316_x_at	CFLAR
212966_at	HIC2
203499_at	EPHA2
201579_at	FAT1
202693_s_at	STK17A
205792_at	CCN5
217974_at	TM7SF3
222075_s_at	OAZ3
202206_at	ARL4C
212799_at	STX6
219236_at	PAQR6
213883_s_at	TM2D1
213038_at	RNF19B
221500_s_at	STX16
213195_at	LYRM9
219038_at	MORC4
204039_at	CEBPA
208900_s_at	TOP1
209681_at	SLC19A2
218196_at	OSTM1
200790_at	ODC1
203987_at	FZD6
202211_at	ARFGAP3
209099_x_at	JAG1
211899_s_at	TRAF4
202432_at	PPP3CB
208156_x_at	EPPK1
203542_s_at	KLF9
214760_at	ZNF337
210278_s_at	AP4S1
218192_at	IP6K2
218536_at	MRS2
210074_at	CTSV
212215_at	PREPL
213115_at	ATG4A
205160_at	PEX11A
220052_s_at	TINF2
204285_s_at	PMAIP1
37590_g_at	ZNF710-AS1
208922_s_at	NXF1
205858_at	NGFR
217906_at	KLHDC2
214794_at	PA2G4
205543_at	HSPA4L
212334_at	GNS
218205_s_at	MKNK2
205187_at	SMAD5
212745_s_at	BBS4
203303_at	DYNLT3
218288_s_at	CCDC90B
201041_s_at	DUSP1
208991_at	STAT3
214138_at	ZNF79
218403_at	TRIAP1
209006_s_at	RSRP1
213923_at	RAP2B
221582_at	H2AC25
212973_at	RPIA
205596_s_at	SMURF2
209917_s_at	TP53TG1
217610_at	SPDYE2
222152_at	PDCD6
218627_at	DRAM1
212463_at	CD59
209201_x_at	CXCR4
201300_s_at	PRNP
202725_at	POLR2A
219020_at	HS1BP3
210362_x_at	PML
202659_at	PSMB10
219154_at	TMEM120B
202181_at	SUSD6
214474_at	PRKAB2
216867_s_at	PDGFA
221962_s_at	UBE2H
201972_at	ATP6V1A
218471_s_at	BBS1
208926_at	NEU1
214658_at	TMED7
202450_s_at	CTSK
203973_s_at	CEBPD
210117_at	SPAG1
200993_at	IPO7
214500_at	MACROH2A1
222208_s_at	POLR2J4
210827_s_at	ELF3
204633_s_at	RPS6KA5
209711_at	SLC35D1
209667_at	CES2
202794_at	INPP1
204417_at	GALC
45653_at	KCTD13
202589_at	TYMS
208812_x_at	HLA-C
220911_s_at	NYNRIN
201202_at	PCNA
204420_at	FOSL1
204224_s_at	GCH1
218157_x_at	CDC42SE1
201443_s_at	ATP6AP2
203123_s_at	SLC11A2
205440_s_at	NPY1R
202193_at	LIMK2
217914_at	TPCN1
202650_s_at	TMEM94
213844_at	HOXA5
219680_at	NLRX1
219720_s_at	GPATCH2L
202219_at	SLC6A8
221006_s_at	SNX27
221577_x_at	GDF15
209345_s_at	PI4K2A
210774_s_at	NCOA4
215891_s_at	GM2A
204250_s_at	CEP164
203855_at	WDR47
222240_s_at	ISYNA1
209260_at	SFN
218853_s_at	MOSPD1
201739_at	SGK1
210001_s_at	SOCS1
205613_at	SYT17
217783_s_at	YPEL5
221601_s_at	FCMR
212835_at	ABRAXAS2
201195_s_at	SLC7A5
210111_s_at	KLHDC10
204516_at	ATXN7
200603_at	PRKAR1A
206066_s_at	RAD51C
207233_s_at	MITF
204379_s_at	FGFR3
213242_x_at	CEP170B
201578_at	PODXL
208070_s_at	REV3L
218424_s_at	STEAP3
208829_at	TAPBP
201631_s_at	IER3
219560_at	RTL10
218631_at	AVPI1
200617_at	MLEC
213874_at	SERPINA4
222164_at	FGFR1
212460_at	SPTSSA
202531_at	IRF1
209306_s_at	SWAP70
209184_s_at	IRS2
212720_at	PAPOLA
217644_s_at	SOS2
218756_s_at	DHRS11
204264_at	CPT2
207549_x_at	CD46
212079_s_at	KMT2A
221887_s_at	WHRN
204061_at	PRKX
208753_s_at	NAP1L1
212730_at	SYNM
214696_at	MIR22HG
215313_x_at	HLA-A
205492_s_at	DPYSL4
201286_at	SDC1
215501_s_at	DUSP10
201834_at	PRKAB1
208729_x_at	HLA-B
202177_at	GAS6
203192_at	ABCB6
204623_at	TFF3
204970_s_at	MAFG
213076_at	ITPKC
218129_s_at	NFYB
207060_at	EN2
202271_at	FBXO28
218180_s_at	EPS8L2
56256_at	SIDT2
218840_s_at	NADSYN1
213326_at	VAMP1
207733_x_at	PSG9
208767_s_at	LAPTM4B
212675_s_at	CEP68
214718_at	GATAD1
212944_at	SLC5A3

## Sheet: Table S7.DExplore-CARMAweb_all
Supplementary Table S7. List of all DEGs detected by both DExplore and CARMAweb
Legend: probeID, the ID of the probe for GPL571 ([HG-U133A_2] Affymetrix Human Genome U133A 2.0 Array); gene symbol, the gene symbol from the NCBI's Gene database
probeID	gene.symbol
202240_at	PLK1
205303_at	KCNJ8
207813_s_at	FDXR
218346_s_at	SESN1
205436_s_at	H2AX
203409_at	DDB2
209294_x_at	TNFRSF10B
206140_at	LHX2
200974_at	ACTA2
202393_s_at	KLF10
202899_s_at	SRSF3
203335_at	PHYH
203764_at	DLGAP5
204780_s_at	FAS
204962_s_at	CENPA
209375_at	XPC
209642_at	BUB1
215785_s_at	CYFIP2
218007_s_at	RPS27L
218769_s_at	ANKRA2
203418_at	CCNA2
205046_at	CENPE
218704_at	RNF43
218755_at	KIF20A
220651_s_at	MCM10
201060_x_at	STOM
209431_s_at	PATZ1
219099_at	TIGAR
220441_at	DNAJC22
200671_s_at	SPTBN1
204244_s_at	DBF4
201896_s_at	PSRC1
204822_at	TTK
205756_s_at	F8
207828_s_at	CENPF
209891_at	SPC25
210052_s_at	TPX2
210166_at	TLR5
210609_s_at	TP53I3
218355_at	KIF4A
219544_at	BORA
219936_s_at	GPR87
219990_at	E2F8
202672_s_at	ATF3
201993_x_at	HNRNPDL
206222_at	TNFRSF10C
208796_s_at	CCNG1
208033_s_at	ZFHX3
221139_s_at	CSAD
203666_at	CXCL12
204566_at	PPM1D
204825_at	MELK
207332_s_at	TFRC
218009_s_at	PRC1
200073_s_at	HNRNPD
200730_s_at	PTP4A1
201294_s_at	WSB1
202107_s_at	MCM2
202307_s_at	TAP1
204066_s_at	AGAP1
209075_s_at	ISCU
212993_at	NACC2
219258_at	TIPIN
219628_at	ZMAT3
203972_s_at	PEX3
204315_s_at	GTSE1
201930_at	MCM6
203625_x_at	SKP2
202870_s_at	CDC20
218611_at	IER5
203721_s_at	UTP18
203887_s_at	THBD
208478_s_at	BAX
211042_x_at	MCAM
203725_at	GADD45A
213222_at	PLCB1
219148_at	PBK
200771_at	LAMC1
207695_s_at	IGSF1
212378_at	GART
213188_s_at	RIOX2
219918_s_at	ASPM
219928_s_at	CABYR
200904_at	HLA-E
201891_s_at	B2M
202017_at	EPHX1
205531_s_at	GLS2
221824_s_at	MARCHF8
218634_at	PHLDA3
202954_at	UBE2C
203276_at	LMNB1
203455_s_at	SAT1
205266_at	LIF
205345_at	BARD1
207165_at	HMMR
210779_x_at	GEMIN2
215068_s_at	FBXL18
218559_s_at	MAFB
218970_s_at	CUTC
219361_s_at	AEN
211715_s_at	BDH1
222087_at	PVT1
219518_s_at	ELL3
208795_s_at	MCM7
214537_at	H1-3
214746_s_at	ZNF467
219342_at	CASD1
202779_s_at	UBE2S
204827_s_at	CCNF
206364_at	KIF14
209189_at	FOS
209449_at	LSM2
211832_s_at	MDM2
212875_s_at	C2CD2
215136_s_at	EXOSC8
217996_at	PHLDA1
218124_at	RETSAT
220233_at	FBXO17
206247_at	MICB
203062_s_at	MDC1
202464_s_at	PFKFB3
202705_at	CCNB2
203159_at	GLS
203362_s_at	MAD2L1
208814_at	HSPA4
209025_s_at	SYNCRIP
210933_s_at	FSCN1
212111_at	STX12
218412_s_at	GTF2IRD1
218480_at	AGBL5
218782_s_at	ATAD2
221591_s_at	PIMREG
221640_s_at	PIDD1
203420_at	FAM8A1
206102_at	GINS1
209714_s_at	CDKN3
220295_x_at	DEPDC1
202284_s_at	CDKN1A
204146_at	RAD51AP1
212403_at	UBE3B
213017_at	ABHD3
218662_s_at	NCAPG
204957_at	ORC5
209421_at	MSH2
205862_at	GREB1
217844_at	CTDSP1
202330_s_at	UNG
207501_s_at	FGF12
204023_at	RFC4
205167_s_at	CDC25C
219512_at	DSN1
218542_at	CEP55
204162_at	NDC80
205053_at	PRIM1
212992_at	AHNAK2
206108_s_at	SRSF6
204641_at	NEK2
221268_s_at	SGPP1
201555_at	MCM3
204274_at	EBAG9
204709_s_at	KIF23
210778_s_at	MXD4
212955_s_at	POLR2I
222077_s_at	RACGAP1
208289_s_at	EI24
212977_at	ACKR3
207017_at	RAB27B
209048_s_at	ZMYND8
213302_at	PFAS
202153_s_at	NUP62
204958_at	PLK3
212543_at	CRYBG1
212885_at	MPHOSPH10
216952_s_at	LMNB2
221931_s_at	SEH1L
212949_at	NCAPH
219627_at	ZNF767P
212510_at	GPD1L
220840_s_at	C1orf112
206052_s_at	SLBP
203755_at	BUB1B
201235_s_at	BTG2
203282_at	GBE1
207574_s_at	GADD45B
209464_at	AURKB
206858_s_at	HOXC6
221260_s_at	CSRNP2
218875_s_at	FBXO5
201478_s_at	DKC1
218349_s_at	ZWILCH
214670_at	ZKSCAN1
202806_at	DBN1
221959_at	FAM110B
216211_at	TASOR2
218734_at	NAA40
203836_s_at	MAP3K5
204805_s_at	H1-10
204092_s_at	AURKA
206103_at	RAC3
209776_s_at	SLC19A1
220212_s_at	THADA
221222_s_at	C1orf56
221485_at	B4GALT5
206928_at	ZNF124
208765_s_at	HNRNPR
209674_at	CRY1
213338_at	TMEM158
201663_s_at	SMC4
203976_s_at	CHAF1A
210028_s_at	ORC3
208758_at	ATIC
203405_at	PSMG1
200892_s_at	TRA2B
205060_at	PARG
208616_s_at	PTP4A2
203967_at	CDC6
204999_s_at	ATF5
205286_at	TFAP2C
208787_at	MRPL3
210312_s_at	IFT20
206533_at	CHRNA5
201301_s_at	ANXA4
211316_x_at	CFLAR
212966_at	HIC2
203499_at	EPHA2
201579_at	FAT1
202693_s_at	STK17A
204284_at	PPP1R3C
204444_at	KIF11
219502_at	NEIL3
200753_x_at	SRSF2
205792_at	CCN5
202326_at	EHMT2
208553_at	H1-4
217974_at	TM7SF3
218350_s_at	GMNN
218974_at	SOBP
221746_at	UBL4A
222075_s_at	OAZ3
202206_at	ARL4C
212799_at	STX6
219236_at	PAQR6
202484_s_at	MBD2
206499_s_at	RCC1
204484_at	PIK3C2B
202848_s_at	GRK6
204857_at	MAD1L1
203343_at	UGDH
213883_s_at	TM2D1
218564_at	RFWD3
213391_at	DPY19L4
207357_s_at	GALNT10
213038_at	RNF19B
221500_s_at	STX16
201867_s_at	TBL1X
221946_at	PIERCE1
91816_f_at	MEX3D
213195_at	LYRM9
219038_at	MORC4
201697_s_at	DNMT1
202251_at	PRPF3
204039_at	CEBPA
213005_s_at	KANK1
221045_s_at	PER3
212137_at	LARP1
209408_at	KIF2C
208510_s_at	PPARG
205339_at	STIL
201690_s_at	TPD52
208900_s_at	TOP1
209681_at	SLC19A2
218196_at	OSTM1
218237_s_at	SLC38A1
218535_s_at	RIOK2
202183_s_at	KIF22
202911_at	MSH6
203145_at	SPAG5
204969_s_at	RDX
221436_s_at	CDCA3
200790_at	ODC1
221665_s_at	EPS8L1
203987_at	FZD6
204835_at	POLA1
202211_at	ARFGAP3
218816_at	LRRC1
204203_at	CEBPG
209099_x_at	JAG1
209119_x_at	NR2F2
211899_s_at	TRAF4
214710_s_at	CCNB1
202432_at	PPP3CB
203006_at	INPP5A
208156_x_at	EPPK1
201742_x_at	SRSF1
209899_s_at	PUF60
200897_s_at	PALLD
203542_s_at	KLF9
203782_s_at	POLRMT
209175_at	SEC23IP
214760_at	ZNF337
206205_at	MPHOSPH9
200687_s_at	SF3B3
204059_s_at	ME1
212445_s_at	NEDD4L
204977_at	DDX10
210278_s_at	AP4S1
209520_s_at	NCBP1
208822_s_at	DAP3
201129_at	SRSF7
218192_at	IP6K2
212761_at	TCF7L2
218536_at	MRS2
210074_at	CTSV
212215_at	PREPL
218553_s_at	KCTD15
219494_at	RAD54B
203287_at	LAD1
208875_s_at	PAK2
213115_at	ATG4A
222250_s_at	INTS7
202691_at	SNRPD1
205160_at	PEX11A
218014_at	NUP85
218027_at	MRPL15
220052_s_at	TINF2
204285_s_at	PMAIP1
37590_g_at	ZNF710-AS1
202722_s_at	GFPT1
219922_s_at	LTBP3
205356_at	USP13
204752_x_at	PARP2
208922_s_at	NXF1
221755_at	EHBP1L1
206929_s_at	NFIC
200037_s_at	CBX3
203565_s_at	MNAT1
205858_at	NGFR
217906_at	KLHDC2
202094_at	BIRC5
214794_at	PA2G4
202431_s_at	MYC
204612_at	PKIA
205543_at	HSPA4L
210947_s_at	MSH3
212334_at	GNS
218205_s_at	MKNK2
203284_s_at	HS2ST1
208165_s_at	PRSS16
204651_at	NRF1
205187_at	SMAD5
208956_x_at	DUT
206723_s_at	LPAR2
206566_at	SLC7A1
212745_s_at	BBS4
203303_at	DYNLT3
221521_s_at	GINS2
204126_s_at	CDC45
204975_at	EMP2
205024_s_at	RAD51
218288_s_at	CCDC90B
201041_s_at	DUSP1
200749_at	RAN
208991_at	STAT3
214138_at	ZNF79
218403_at	TRIAP1
205282_at	LRP8
205292_s_at	HNRNPA2B1
215084_s_at	LRRC42
218112_at	MRPS34
218399_s_at	CDCA4
208659_at	CLIC1
207688_s_at	INHBC
212093_s_at	MTUS1
220225_at	IRX4
205253_at	PBX1
209006_s_at	RSRP1
201385_at	DHX15
212462_at	KAT6B
213923_at	RAP2B
219050_s_at	ZNHIT2
221582_at	H2AC25
212973_at	RPIA
205596_s_at	SMURF2
201020_at	YWHAH
214030_at	CRYBG3
212160_at	XPOT
209917_s_at	TP53TG1
209832_s_at	CDT1
217610_at	SPDYE2
219152_at	PODXL2
222152_at	PDCD6
214755_at	UAP1L1
205034_at	CCNE2
208313_s_at	SF1
217946_s_at	SAE1
219037_at	RRP15
218627_at	DRAM1
212463_at	CD59
213427_at	RPP40
209201_x_at	CXCR4
211763_s_at	UBE2B
214404_x_at	SPDEF
219860_at	LY6G5C
205093_at	PLEKHA6
218176_at	MAGEF1
219932_at	SLC27A6
201300_s_at	PRNP
202725_at	POLR2A
206043_s_at	ATP2C2
208793_x_at	SMARCA4
219020_at	HS1BP3
204990_s_at	ITGB4
209998_at	PIGO
219077_s_at	WWOX
210362_x_at	PML
202659_at	PSMB10
213677_s_at	PMS1
219154_at	TMEM120B
202181_at	SUSD6
214474_at	PRKAB2
204817_at	ESPL1
216867_s_at	PDGFA
221962_s_at	UBE2H
201972_at	ATP6V1A
212436_at	TRIM33
219787_s_at	ECT2
218471_s_at	BBS1
203035_s_at	PIAS3
201773_at	ADNP
208926_at	NEU1
214658_at	TMED7
221311_x_at	LYRM2
202450_s_at	CTSK
218308_at	TACC3
203973_s_at	CEBPD
210117_at	SPAG1
218080_x_at	FAF1
200993_at	IPO7
214500_at	MACROH2A1
222208_s_at	POLR2J4
213632_at	DHODH
203978_at	NUBP1
222216_s_at	MRPL17
209526_s_at	HDGFL3
203344_s_at	RBBP8
207124_s_at	GNB5
210827_s_at	ELF3
212512_s_at	CARM1
201054_at	HNRNPA0
204633_s_at	RPS6KA5
209692_at	EYA2
209711_at	SLC35D1
218941_at	FBXW2
209667_at	CES2
202794_at	INPP1
212846_at	RRP1B
212030_at	RBM25
205110_s_at	FGF13
221050_s_at	GTPBP2
204417_at	GALC
209617_s_at	CTNND2
45653_at	KCTD13
202905_x_at	NBN
203806_s_at	FANCA
202589_at	TYMS
203201_at	PMM2
210389_x_at	TUBD1
208812_x_at	HLA-C
212020_s_at	MKI67
205769_at	SLC27A2
220911_s_at	NYNRIN
222118_at	CENPN
201202_at	PCNA
201361_at	TMEM109
213912_at	TBC1D30
215285_s_at	PHTF1
219306_at	KIF15
222209_s_at	TMEM135
201718_s_at	EPB41L2
204420_at	FOSL1
204224_s_at	GCH1
212722_s_at	JMJD6
201313_at	ENO2
218157_x_at	CDC42SE1
203906_at	IQSEC1
201443_s_at	ATP6AP2
201755_at	MCM5
203123_s_at	SLC11A2
219553_at	NME7
218726_at	HJURP
205440_s_at	NPY1R
202193_at	LIMK2
203270_at	DTYMK
217914_at	TPCN1
202650_s_at	TMEM94
213844_at	HOXA5
219680_at	NLRX1
219720_s_at	GPATCH2L
202219_at	SLC6A8
205031_at	EFNB3
209026_x_at	TUBB
207590_s_at	CENPI
203588_s_at	TFDP2
221006_s_at	SNX27
212563_at	BOP1
221577_x_at	GDF15
209345_s_at	PI4K2A
218384_at	CARHSP1
204478_s_at	RABIF
205500_at	C5
210774_s_at	NCOA4
215891_s_at	GM2A
204250_s_at	CEP164
212660_at	JADE2
221865_at	TMEM268
202425_x_at	PPP3CA
203432_at	TMPO
204299_at	SRSF10
205240_at	GPSM2
210791_s_at	ARHGAP32
200965_s_at	ABLIM1
203855_at	WDR47
218866_s_at	POLR3K
222240_s_at	ISYNA1
204941_s_at	ALDH3B2
209260_at	SFN
218853_s_at	MOSPD1
201739_at	SGK1
209151_x_at	TCF3
210001_s_at	SOCS1
212858_at	PAQR4
34726_at	CACNB3
204240_s_at	SMC2
205613_at	SYT17
218886_at	PAK1IP1
217783_s_at	YPEL5
221601_s_at	FCMR
210220_at	FZD2
212835_at	ABRAXAS2
35148_at	TJP3
219335_at	ARMCX5
209482_at	POP7
202253_s_at	DNM2
201195_s_at	SLC7A5
202633_at	TOPBP1
206414_s_at	ASAP2
209155_s_at	NT5C2
203594_at	RTCA
210111_s_at	KLHDC10
204516_at	ATXN7
201937_s_at	DNPEP
212511_at	PICALM
200603_at	PRKAR1A
218788_s_at	SMYD3
206066_s_at	RAD51C
213308_at	SHANK2
207233_s_at	MITF
204379_s_at	FGFR3
202875_s_at	PBX2
202246_s_at	CDK4
206452_x_at	PTPA
213242_x_at	CEP170B
221652_s_at	INTS13
201578_at	PODXL
218585_s_at	DTL
201801_s_at	SLC29A1
209527_at	EXOSC2
208070_s_at	REV3L
218424_s_at	STEAP3
220488_s_at	BCAS3
218885_s_at	GALNT12
222028_at	ZNF45
201951_at	ALCAM
221058_s_at	CKLF
208829_at	TAPBP
211116_at	SLC9A2
201631_s_at	IER3
202599_s_at	NRIP1
202111_at	SLC4A2
219560_at	RTL10
201702_s_at	PPP1R10
204082_at	PBX3
204510_at	CDC7
218631_at	AVPI1
203503_s_at	PEX14
200617_at	MLEC
213874_at	SERPINA4
222164_at	FGFR1
204384_at	GOLGA2
213562_s_at	SQLE
212460_at	SPTSSA
202531_at	IRF1
206689_x_at	KAT5
209306_s_at	SWAP70
202293_at	STAG1
209184_s_at	IRS2
205135_s_at	NUFIP1
212720_at	PAPOLA
217644_s_at	SOS2
218756_s_at	DHRS11
204264_at	CPT2
207549_x_at	CD46
212079_s_at	KMT2A
218435_at	DNAJC15
221887_s_at	WHRN
221566_s_at	NOL3
221280_s_at	PARD3
204061_at	PRKX
213918_s_at	NIPBL
208753_s_at	NAP1L1
202606_s_at	TLK1
212730_at	SYNM
214696_at	MIR22HG
209488_s_at	RBPMS
204127_at	RFC3
202262_x_at	DDAH2
215313_x_at	HLA-A
205492_s_at	DPYSL4
200621_at	CSRP1
209610_s_at	SLC1A4
201286_at	SDC1
212037_at	PNN
215501_s_at	DUSP10
218729_at	LXN
201182_s_at	CHD4
201834_at	PRKAB1
201995_at	EXT1
208978_at	CRIP2
202741_at	PRKACB
203372_s_at	SOCS2
203690_at	TUBGCP3
201584_s_at	DDX39A
208729_x_at	HLA-B
202177_at	GAS6
203192_at	ABCB6
204623_at	TFF3
204970_s_at	MAFG
213076_at	ITPKC
202945_at	FPGS
218129_s_at	NFYB
203340_s_at	SLC25A12
208939_at	SEPHS1
207060_at	EN2
202271_at	FBXO28
204105_s_at	NRCAM
213149_at	DLAT
218180_s_at	EPS8L2
219978_s_at	NUSAP1
201927_s_at	PKP4
204531_s_at	BRCA1
204944_at	PTPRG
56256_at	SIDT2
201362_at	IVNS1ABP
219212_at	HSPA14
201014_s_at	PAICS
212141_at	MCM4
212281_s_at	TMEM97
212254_s_at	DST
213478_at	KAZN
219229_at	SLCO3A1
218840_s_at	NADSYN1
200934_at	DEK
221703_at	BRIP1
218984_at	PUS7
213326_at	VAMP1
205573_s_at	SNX7
207733_x_at	PSG9
203630_s_at	COG5
206280_at	CDH18
202625_at	LYN
204341_at	TRIM16
202983_at	HLTF
208767_s_at	LAPTM4B
212675_s_at	CEP68
201196_s_at	AMD1
41037_at	TEAD4
214718_at	GATAD1
218510_x_at	RETREG1
218189_s_at	NANS
212944_at	SLC5A3
212481_s_at	TPM4

## Sheet: Table S8.DExplore-CARMAweb_down
Supplementary Table S8. List of downregulated DEGs detected by both DExplore and CARMAweb
Legend: probeID, the ID of the probe for GPL571 ([HG-U133A_2] Affymetrix Human Genome U133A 2.0 Array); gene symbol, the gene symbol from the NCBI's Gene database
probeID	gene.symbol
202240_at	PLK1
205303_at	KCNJ8
205436_s_at	H2AX
206140_at	LHX2
202899_s_at	SRSF3
203764_at	DLGAP5
204962_s_at	CENPA
209642_at	BUB1
203418_at	CCNA2
205046_at	CENPE
218704_at	RNF43
218755_at	KIF20A
220651_s_at	MCM10
209431_s_at	PATZ1
220441_at	DNAJC22
200671_s_at	SPTBN1
204244_s_at	DBF4
201896_s_at	PSRC1
204822_at	TTK
207828_s_at	CENPF
209891_at	SPC25
210052_s_at	TPX2
218355_at	KIF4A
219544_at	BORA
219990_at	E2F8
201993_x_at	HNRNPDL
208033_s_at	ZFHX3
204825_at	MELK
218009_s_at	PRC1
200073_s_at	HNRNPD
202107_s_at	MCM2
204066_s_at	AGAP1
219258_at	TIPIN
203972_s_at	PEX3
204315_s_at	GTSE1
201930_at	MCM6
203625_x_at	SKP2
202870_s_at	CDC20
203721_s_at	UTP18
211042_x_at	MCAM
213222_at	PLCB1
219148_at	PBK
212378_at	GART
213188_s_at	RIOX2
219918_s_at	ASPM
202954_at	UBE2C
203276_at	LMNB1
205345_at	BARD1
207165_at	HMMR
210779_x_at	GEMIN2
218970_s_at	CUTC
211715_s_at	BDH1
208795_s_at	MCM7
214537_at	H1-3
214746_s_at	ZNF467
202779_s_at	UBE2S
204827_s_at	CCNF
206364_at	KIF14
209449_at	LSM2
212875_s_at	C2CD2
215136_s_at	EXOSC8
217996_at	PHLDA1
220233_at	FBXO17
203062_s_at	MDC1
202464_s_at	PFKFB3
202705_at	CCNB2
203362_s_at	MAD2L1
209025_s_at	SYNCRIP
218412_s_at	GTF2IRD1
218782_s_at	ATAD2
221591_s_at	PIMREG
206102_at	GINS1
209714_s_at	CDKN3
220295_x_at	DEPDC1
204146_at	RAD51AP1
218662_s_at	NCAPG
204957_at	ORC5
209421_at	MSH2
217844_at	CTDSP1
202330_s_at	UNG
207501_s_at	FGF12
204023_at	RFC4
205167_s_at	CDC25C
219512_at	DSN1
218542_at	CEP55
204162_at	NDC80
205053_at	PRIM1
206108_s_at	SRSF6
204641_at	NEK2
201555_at	MCM3
204274_at	EBAG9
204709_s_at	KIF23
212955_s_at	POLR2I
222077_s_at	RACGAP1
212977_at	ACKR3
207017_at	RAB27B
209048_s_at	ZMYND8
213302_at	PFAS
202153_s_at	NUP62
212543_at	CRYBG1
212885_at	MPHOSPH10
216952_s_at	LMNB2
221931_s_at	SEH1L
212949_at	NCAPH
220840_s_at	C1orf112
206052_s_at	SLBP
203755_at	BUB1B
209464_at	AURKB
206858_s_at	HOXC6
218875_s_at	FBXO5
201478_s_at	DKC1
218349_s_at	ZWILCH
202806_at	DBN1
221959_at	FAM110B
218734_at	NAA40
203836_s_at	MAP3K5
204805_s_at	H1-10
204092_s_at	AURKA
206103_at	RAC3
209776_s_at	SLC19A1
220212_s_at	THADA
208765_s_at	HNRNPR
201663_s_at	SMC4
203976_s_at	CHAF1A
210028_s_at	ORC3
208758_at	ATIC
203405_at	PSMG1
200892_s_at	TRA2B
208616_s_at	PTP4A2
203967_at	CDC6
208787_at	MRPL3
206533_at	CHRNA5
204284_at	PPP1R3C
204444_at	KIF11
219502_at	NEIL3
200753_x_at	SRSF2
202326_at	EHMT2
208553_at	H1-4
218350_s_at	GMNN
218974_at	SOBP
221746_at	UBL4A
202484_s_at	MBD2
206499_s_at	RCC1
204484_at	PIK3C2B
202848_s_at	GRK6
204857_at	MAD1L1
203343_at	UGDH
218564_at	RFWD3
213391_at	DPY19L4
207357_s_at	GALNT10
201867_s_at	TBL1X
221946_at	PIERCE1
91816_f_at	MEX3D
201697_s_at	DNMT1
202251_at	PRPF3
213005_s_at	KANK1
221045_s_at	PER3
212137_at	LARP1
209408_at	KIF2C
208510_s_at	PPARG
205339_at	STIL
201690_s_at	TPD52
218237_s_at	SLC38A1
218535_s_at	RIOK2
202183_s_at	KIF22
202911_at	MSH6
203145_at	SPAG5
204969_s_at	RDX
221436_s_at	CDCA3
221665_s_at	EPS8L1
204835_at	POLA1
218816_at	LRRC1
204203_at	CEBPG
209119_x_at	NR2F2
214710_s_at	CCNB1
203006_at	INPP5A
201742_x_at	SRSF1
209899_s_at	PUF60
200897_s_at	PALLD
203782_s_at	POLRMT
209175_at	SEC23IP
206205_at	MPHOSPH9
200687_s_at	SF3B3
204059_s_at	ME1
212445_s_at	NEDD4L
204977_at	DDX10
209520_s_at	NCBP1
208822_s_at	DAP3
201129_at	SRSF7
212761_at	TCF7L2
218553_s_at	KCTD15
219494_at	RAD54B
203287_at	LAD1
208875_s_at	PAK2
222250_s_at	INTS7
202691_at	SNRPD1
218014_at	NUP85
218027_at	MRPL15
202722_s_at	GFPT1
219922_s_at	LTBP3
205356_at	USP13
204752_x_at	PARP2
221755_at	EHBP1L1
206929_s_at	NFIC
200037_s_at	CBX3
203565_s_at	MNAT1
202094_at	BIRC5
202431_s_at	MYC
204612_at	PKIA
210947_s_at	MSH3
203284_s_at	HS2ST1
208165_s_at	PRSS16
204651_at	NRF1
208956_x_at	DUT
206723_s_at	LPAR2
206566_at	SLC7A1
221521_s_at	GINS2
204126_s_at	CDC45
204975_at	EMP2
205024_s_at	RAD51
200749_at	RAN
205282_at	LRP8
205292_s_at	HNRNPA2B1
215084_s_at	LRRC42
218112_at	MRPS34
218399_s_at	CDCA4
208659_at	CLIC1
207688_s_at	INHBC
212093_s_at	MTUS1
220225_at	IRX4
205253_at	PBX1
201385_at	DHX15
212462_at	KAT6B
219050_s_at	ZNHIT2
201020_at	YWHAH
214030_at	CRYBG3
212160_at	XPOT
209832_s_at	CDT1
219152_at	PODXL2
214755_at	UAP1L1
205034_at	CCNE2
208313_s_at	SF1
217946_s_at	SAE1
219037_at	RRP15
213427_at	RPP40
211763_s_at	UBE2B
214404_x_at	SPDEF
219860_at	LY6G5C
205093_at	PLEKHA6
218176_at	MAGEF1
219932_at	SLC27A6
206043_s_at	ATP2C2
208793_x_at	SMARCA4
204990_s_at	ITGB4
209998_at	PIGO
219077_s_at	WWOX
213677_s_at	PMS1
204817_at	ESPL1
212436_at	TRIM33
219787_s_at	ECT2
203035_s_at	PIAS3
201773_at	ADNP
221311_x_at	LYRM2
218308_at	TACC3
218080_x_at	FAF1
213632_at	DHODH
203978_at	NUBP1
222216_s_at	MRPL17
209526_s_at	HDGFL3
203344_s_at	RBBP8
207124_s_at	GNB5
212512_s_at	CARM1
201054_at	HNRNPA0
209692_at	EYA2
218941_at	FBXW2
212846_at	RRP1B
212030_at	RBM25
205110_s_at	FGF13
221050_s_at	GTPBP2
209617_s_at	CTNND2
202905_x_at	NBN
203806_s_at	FANCA
203201_at	PMM2
210389_x_at	TUBD1
212020_s_at	MKI67
205769_at	SLC27A2
222118_at	CENPN
201361_at	TMEM109
213912_at	TBC1D30
215285_s_at	PHTF1
219306_at	KIF15
222209_s_at	TMEM135
201718_s_at	EPB41L2
212722_s_at	JMJD6
201313_at	ENO2
203906_at	IQSEC1
201755_at	MCM5
219553_at	NME7
218726_at	HJURP
203270_at	DTYMK
205031_at	EFNB3
209026_x_at	TUBB
207590_s_at	CENPI
203588_s_at	TFDP2
212563_at	BOP1
218384_at	CARHSP1
204478_s_at	RABIF
205500_at	C5
212660_at	JADE2
221865_at	TMEM268
202425_x_at	PPP3CA
203432_at	TMPO
204299_at	SRSF10
205240_at	GPSM2
210791_s_at	ARHGAP32
200965_s_at	ABLIM1
218866_s_at	POLR3K
204941_s_at	ALDH3B2
209151_x_at	TCF3
212858_at	PAQR4
34726_at	CACNB3
204240_s_at	SMC2
218886_at	PAK1IP1
210220_at	FZD2
35148_at	TJP3
219335_at	ARMCX5
209482_at	POP7
202253_s_at	DNM2
202633_at	TOPBP1
206414_s_at	ASAP2
209155_s_at	NT5C2
203594_at	RTCA
201937_s_at	DNPEP
212511_at	PICALM
218788_s_at	SMYD3
213308_at	SHANK2
202875_s_at	PBX2
202246_s_at	CDK4
206452_x_at	PTPA
221652_s_at	INTS13
218585_s_at	DTL
201801_s_at	SLC29A1
209527_at	EXOSC2
220488_s_at	BCAS3
218885_s_at	GALNT12
222028_at	ZNF45
201951_at	ALCAM
221058_s_at	CKLF
211116_at	SLC9A2
202599_s_at	NRIP1
202111_at	SLC4A2
201702_s_at	PPP1R10
204082_at	PBX3
204510_at	CDC7
203503_s_at	PEX14
204384_at	GOLGA2
213562_s_at	SQLE
206689_x_at	KAT5
202293_at	STAG1
205135_s_at	NUFIP1
218435_at	DNAJC15
221566_s_at	NOL3
221280_s_at	PARD3
213918_s_at	NIPBL
202606_s_at	TLK1
209488_s_at	RBPMS
204127_at	RFC3
202262_x_at	DDAH2
200621_at	CSRP1
209610_s_at	SLC1A4
212037_at	PNN
218729_at	LXN
201182_s_at	CHD4
201995_at	EXT1
208978_at	CRIP2
202741_at	PRKACB
203372_s_at	SOCS2
203690_at	TUBGCP3
201584_s_at	DDX39A
202945_at	FPGS
203340_s_at	SLC25A12
208939_at	SEPHS1
204105_s_at	NRCAM
213149_at	DLAT
219978_s_at	NUSAP1
201927_s_at	PKP4
204531_s_at	BRCA1
204944_at	PTPRG
201362_at	IVNS1ABP
219212_at	HSPA14
201014_s_at	PAICS
212141_at	MCM4
212281_s_at	TMEM97
212254_s_at	DST
213478_at	KAZN
219229_at	SLCO3A1
200934_at	DEK
221703_at	BRIP1
218984_at	PUS7
205573_s_at	SNX7
203630_s_at	COG5
206280_at	CDH18
202625_at	LYN
204341_at	TRIM16
202983_at	HLTF
201196_s_at	AMD1
41037_at	TEAD4
218510_x_at	RETREG1
218189_s_at	NANS
212481_s_at	TPM4

## Sheet: Table S9.DExplore-CARMAweb_up
Supplementary Table S9. List of upregulated DEGs detected by both DExplore and CARMAweb
Legend: probeID, the ID of the probe for GPL571 ([HG-U133A_2] Affymetrix Human Genome U133A 2.0 Array); gene symbol, the gene symbol from the NCBI's Gene database
probeID	gene.symbol
207813_s_at	FDXR
218346_s_at	SESN1
203409_at	DDB2
209294_x_at	TNFRSF10B
200974_at	ACTA2
202393_s_at	KLF10
203335_at	PHYH
204780_s_at	FAS
209375_at	XPC
215785_s_at	CYFIP2
218007_s_at	RPS27L
218769_s_at	ANKRA2
201060_x_at	STOM
219099_at	TIGAR
205756_s_at	F8
210166_at	TLR5
210609_s_at	TP53I3
219936_s_at	GPR87
202672_s_at	ATF3
206222_at	TNFRSF10C
208796_s_at	CCNG1
221139_s_at	CSAD
203666_at	CXCL12
204566_at	PPM1D
207332_s_at	TFRC
200730_s_at	PTP4A1
201294_s_at	WSB1
202307_s_at	TAP1
209075_s_at	ISCU
212993_at	NACC2
219628_at	ZMAT3
218611_at	IER5
203887_s_at	THBD
208478_s_at	BAX
203725_at	GADD45A
200771_at	LAMC1
207695_s_at	IGSF1
219928_s_at	CABYR
200904_at	HLA-E
201891_s_at	B2M
202017_at	EPHX1
205531_s_at	GLS2
221824_s_at	MARCHF8
218634_at	PHLDA3
203455_s_at	SAT1
205266_at	LIF
215068_s_at	FBXL18
218559_s_at	MAFB
219361_s_at	AEN
222087_at	PVT1
219518_s_at	ELL3
219342_at	CASD1
209189_at	FOS
211832_s_at	MDM2
218124_at	RETSAT
206247_at	MICB
203159_at	GLS
208814_at	HSPA4
210933_s_at	FSCN1
212111_at	STX12
218480_at	AGBL5
221640_s_at	PIDD1
203420_at	FAM8A1
202284_s_at	CDKN1A
212403_at	UBE3B
213017_at	ABHD3
205862_at	GREB1
212992_at	AHNAK2
221268_s_at	SGPP1
210778_s_at	MXD4
208289_s_at	EI24
204958_at	PLK3
219627_at	ZNF767P
212510_at	GPD1L
201235_s_at	BTG2
203282_at	GBE1
207574_s_at	GADD45B
221260_s_at	CSRNP2
214670_at	ZKSCAN1
216211_at	TASOR2
221222_s_at	C1orf56
221485_at	B4GALT5
206928_at	ZNF124
209674_at	CRY1
213338_at	TMEM158
205060_at	PARG
204999_s_at	ATF5
205286_at	TFAP2C
210312_s_at	IFT20
201301_s_at	ANXA4
211316_x_at	CFLAR
212966_at	HIC2
203499_at	EPHA2
201579_at	FAT1
202693_s_at	STK17A
205792_at	CCN5
217974_at	TM7SF3
222075_s_at	OAZ3
202206_at	ARL4C
212799_at	STX6
219236_at	PAQR6
213883_s_at	TM2D1
213038_at	RNF19B
221500_s_at	STX16
213195_at	LYRM9
219038_at	MORC4
204039_at	CEBPA
208900_s_at	TOP1
209681_at	SLC19A2
218196_at	OSTM1
200790_at	ODC1
203987_at	FZD6
202211_at	ARFGAP3
209099_x_at	JAG1
211899_s_at	TRAF4
202432_at	PPP3CB
208156_x_at	EPPK1
203542_s_at	KLF9
214760_at	ZNF337
210278_s_at	AP4S1
218192_at	IP6K2
218536_at	MRS2
210074_at	CTSV
212215_at	PREPL
213115_at	ATG4A
205160_at	PEX11A
220052_s_at	TINF2
204285_s_at	PMAIP1
37590_g_at	ZNF710-AS1
208922_s_at	NXF1
205858_at	NGFR
217906_at	KLHDC2
214794_at	PA2G4
205543_at	HSPA4L
212334_at	GNS
218205_s_at	MKNK2
205187_at	SMAD5
212745_s_at	BBS4
203303_at	DYNLT3
218288_s_at	CCDC90B
201041_s_at	DUSP1
208991_at	STAT3
214138_at	ZNF79
218403_at	TRIAP1
209006_s_at	RSRP1
213923_at	RAP2B
221582_at	H2AC25
212973_at	RPIA
205596_s_at	SMURF2
209917_s_at	TP53TG1
217610_at	SPDYE2
222152_at	PDCD6
218627_at	DRAM1
212463_at	CD59
209201_x_at	CXCR4
201300_s_at	PRNP
202725_at	POLR2A
219020_at	HS1BP3
210362_x_at	PML
202659_at	PSMB10
219154_at	TMEM120B
202181_at	SUSD6
214474_at	PRKAB2
216867_s_at	PDGFA
221962_s_at	UBE2H
201972_at	ATP6V1A
218471_s_at	BBS1
208926_at	NEU1
214658_at	TMED7
202450_s_at	CTSK
203973_s_at	CEBPD
210117_at	SPAG1
200993_at	IPO7
214500_at	MACROH2A1
222208_s_at	POLR2J4
210827_s_at	ELF3
204633_s_at	RPS6KA5
209711_at	SLC35D1
209667_at	CES2
202794_at	INPP1
204417_at	GALC
45653_at	KCTD13
202589_at	TYMS
208812_x_at	HLA-C
220911_s_at	NYNRIN
201202_at	PCNA
204420_at	FOSL1
204224_s_at	GCH1
218157_x_at	CDC42SE1
201443_s_at	ATP6AP2
203123_s_at	SLC11A2
205440_s_at	NPY1R
202193_at	LIMK2
217914_at	TPCN1
202650_s_at	TMEM94
213844_at	HOXA5
219680_at	NLRX1
219720_s_at	GPATCH2L
202219_at	SLC6A8
221006_s_at	SNX27
221577_x_at	GDF15
209345_s_at	PI4K2A
210774_s_at	NCOA4
215891_s_at	GM2A
204250_s_at	CEP164
203855_at	WDR47
222240_s_at	ISYNA1
209260_at	SFN
218853_s_at	MOSPD1
201739_at	SGK1
210001_s_at	SOCS1
205613_at	SYT17
217783_s_at	YPEL5
221601_s_at	FCMR
212835_at	ABRAXAS2
201195_s_at	SLC7A5
210111_s_at	KLHDC10
204516_at	ATXN7
200603_at	PRKAR1A
206066_s_at	RAD51C
207233_s_at	MITF
204379_s_at	FGFR3
213242_x_at	CEP170B
201578_at	PODXL
208070_s_at	REV3L
218424_s_at	STEAP3
208829_at	TAPBP
201631_s_at	IER3
219560_at	RTL10
218631_at	AVPI1
200617_at	MLEC
213874_at	SERPINA4
222164_at	FGFR1
212460_at	SPTSSA
202531_at	IRF1
209306_s_at	SWAP70
209184_s_at	IRS2
212720_at	PAPOLA
217644_s_at	SOS2
218756_s_at	DHRS11
204264_at	CPT2
207549_x_at	CD46
212079_s_at	KMT2A
221887_s_at	WHRN
204061_at	PRKX
208753_s_at	NAP1L1
212730_at	SYNM
214696_at	MIR22HG
215313_x_at	HLA-A
205492_s_at	DPYSL4
201286_at	SDC1
215501_s_at	DUSP10
201834_at	PRKAB1
208729_x_at	HLA-B
202177_at	GAS6
203192_at	ABCB6
204623_at	TFF3
204970_s_at	MAFG
213076_at	ITPKC
218129_s_at	NFYB
207060_at	EN2
202271_at	FBXO28
218180_s_at	EPS8L2
56256_at	SIDT2
218840_s_at	NADSYN1
213326_at	VAMP1
207733_x_at	PSG9
208767_s_at	LAPTM4B
212675_s_at	CEP68
214718_at	GATAD1
212944_at	SLC5A3
