# Supplementary material for: DExplore: An Online Tool for Detecting Differentially Expressed Genes from mRNA Microarray Experiments
Source: Biology (Basel). 2024 May 16;13(5):351. doi: 10.3390/biology13050351 (PMC11117493; doi:10.3390/biology13050351)
Supplement: Supplementary file 1 [file biology-13-00351-s001.zip › Tables S25-S33_DEGs_GSE113427.xlsx]

## Sheet: Table S25.DExpl_GSE113427_all
Supplementary Table S25. List of all DEGs detected by DExplore using GSE113427 dataset
Legend: probeID, the ID of the probe for GPL16686 ([HuGene-2_0-st] Affymetrix Human Gene 2.0 ST Array [transcript (gene) version]); gene symbol, the gene symbol from the NCBI's Gene database; logFC, the log2-fold change for the corresponding probe; AveExpr, the average expression level for the corresponding probe across all the arrays; t, the moderated t-statistic, i.e., the ratio of the log2-fol…
probeID	gene symbol	logFC	AveExpr	t	P.Value	adj.P.Val	B
16989636	KIF20A	-1.29	10.3	-20	6.46e-11	1.38e-06	14.2
16817017	PLK1	-1.42	10.6	-17.8	2.91e-10	3.11e-06	13.1
16688386	DEPDC1	-0.952	9.57	-13.9	5.17e-09	2.21e-05	10.8
16939637	VIPR1	-0.793	8.76	-14	4.81e-09	2.21e-05	10.9
16697695	KIF14	-1.13	9.71	-13.4	8.55e-09	2.58e-05	10.4
16783047	G2E3	-0.972	9.45	-13.2	9.66e-09	2.58e-05	10.3
16829738	CTNS	-0.72	8.29	-13.4	7.9e-09	2.58e-05	10.4
17110367	MIR222	-0.654	9.56	-12.6	1.76e-08	3.44e-05	9.76
17126284	LINC01348	1.09	7.57	12.6	1.72e-08	3.44e-05	9.78
16697544	ASPM	-0.846	10.3	-11.3	5.95e-08	7.08e-05	8.67
17048538	CASD1	0.613	9.21	11.3	5.8e-08	7.08e-05	8.7
16777185	GJB2	-1.35	8.17	-11.1	7.63e-08	8.31e-05	8.45
17097211	PTGR1	0.509	9.44	11	7.76e-08	8.31e-05	8.43
16952782	TMEM158	0.504	10.4	11	8.2e-08	8.35e-05	8.38
16658589	LINC01714	1.1	8.57	10.8	1.05e-07	0.000102	8.16
16779444	VPS36	-0.728	7.55	-10.5	1.39e-07	0.000119	7.9
16903327	GTDC1	-0.608	7.9	-10.5	1.35e-07	0.000119	7.93
17053535	ASIC3	0.661	7.57	10.3	1.8e-07	0.000149	7.66
16698984	NEK2	-0.781	9.17	-10.2	1.97e-07	0.000151	7.58
16973753	LOC105374352	-0.936	7.34	-10.1	2.09e-07	0.000154	7.52
16818359	TGFB1I1	-0.745	8.95	-9.95	2.55e-07	0.000176	7.34
17016509	H3C12	-0.959	7.43	-9.95	2.55e-07	0.000176	7.34
16834931	FMNL1	-0.787	9.34	-9.9	2.69e-07	0.000176	7.29
16985599	CCNB1	-0.887	9.07	-9.92	2.72e-07	0.000176	7.28
16684194	TAF12	0.803	7.41	9.79	3.05e-07	0.000186	7.17
16859205	UCA1	0.961	10.3	9.88	2.96e-07	0.000186	7.2
16948063	NLGN1	-0.961	7.28	-9.74	3.24e-07	0.000193	7.11
16699634	TLR5	0.799	7.94	9.64	3.64e-07	0.000205	7
16717235	AVPI1	0.712	9.75	9.64	3.62e-07	0.000205	7.01
17111738	OPHN1	-0.507	9.76	-9.5	4.27e-07	0.000229	6.85
16978568	CENPE	-0.986	9.84	-9.47	4.7e-07	0.000245	6.77
16721835	WEE1	-0.536	10.5	-9.4	4.84e-07	0.000247	6.74
16684080	IFI6	0.892	9.38	9.33	5.6e-07	0.000255	6.6
16864275	CPT1C	0.68	8.34	9.29	5.46e-07	0.000255	6.62
17017290	GPANK1	0.536	8.24	9.32	5.3e-07	0.000255	6.65
16969911	ANK2	-0.516	7.87	-9.14	6.54e-07	0.000286	6.45
16775324	BORA	-0.767	8.54	-8.93	8.44e-07	0.000354	6.21
16793225	DLGAP5	-0.72	10.7	-8.94	8.74e-07	0.00036	6.18
16934671	TST	0.52	10	8.89	8.9e-07	0.00036	6.16
16914374	PCIF1	-0.533	8.39	-8.81	9.81e-07	0.000368	6.07
16974722	LCORL	-0.627	8.38	-8.68	1.16e-06	0.000415	5.9
17059828	TFPI2	0.725	9.97	8.71	1.15e-06	0.000415	5.92
16900931	TSGA10	0.563	7.77	8.65	1.19e-06	0.000417	5.88
16938527	RBMS3	-0.582	8.18	-8.51	1.44e-06	0.00046	5.7
16755692	GAS2L3	-0.767	9.41	-8.41	1.7e-06	0.000522	5.54
16761495	TAS2R10	-1.42	7.3	-8.41	1.73e-06	0.000522	5.53
16920548	AURKA	-0.741	9.77	-8.41	1.71e-06	0.000522	5.54
16922459	LINC01426	0.845	7.24	8.39	1.67e-06	0.000522	5.56
16959531	STAG1	-0.579	8.6	-8.33	1.8e-06	0.000529	5.49
16668079	GPSM2	-0.53	9.28	-8.29	1.9e-06	0.000548	5.44
16991741	PTTG1	-0.673	7.57	-8.27	1.95e-06	0.000555	5.41
16850216	SECTM1	0.555	9.4	8.14	2.3e-06	0.000641	5.25
17117682	MMP25-AS1	0.692	7.11	8.01	2.73e-06	0.000688	5.08
16761502	TAS2R14	-0.704	7.57	-7.94	3.01e-06	0.000707	4.99
16968765	HERC5	0.685	8.65	7.96	2.94e-06	0.000707	5.01
17109326	CLTRN	0.831	7.27	7.95	2.97e-06	0.000707	5
17023484	ARHGAP18	-0.531	9.83	-7.93	3.06e-06	0.000711	4.98
16774053	CCNA1	-0.643	7.69	-7.87	3.31e-06	0.000734	4.9
16842237	SNORD3C	-0.973	10.1	-7.91	3.3e-06	0.000734	4.91
16855600	CCBE1	-0.574	8.45	-7.71	4.13e-06	0.000804	4.68
16942270	PTPRG	-0.568	9.7	-7.59	4.84e-06	0.000899	4.53
17012859	PDE7B	-0.583	9.16	-7.59	4.87e-06	0.000899	4.52
16809093	GABPB1	-0.558	9.11	-7.55	5.12e-06	0.000926	4.47
16987008	RASA1	-0.635	10.6	-7.58	5.15e-06	0.000926	4.47
16761518	TAS2R31	-0.764	7.19	-7.46	5.78e-06	0.000969	4.36
16861997	ZFP36	0.509	8.78	7.46	5.8e-06	0.000969	4.35
16839757	SHPK	0.621	9.88	7.43	6.25e-06	0.00101	4.28
17070061	LY96	0.665	8.34	7.39	6.45e-06	0.00103	4.25
16889251	SGO2	-0.648	8.75	-7.32	7.15e-06	0.00106	4.15
16971943	ETFDH	0.506	9.09	7.34	6.85e-06	0.00106	4.19
17121496	ARHGAP23	-0.521	8.17	-7.31	7.22e-06	0.00106	4.14
16784215	GPR137C	0.656	7.63	7.27	7.63e-06	0.00108	4.09
16705661	COL13A1	-0.537	8.65	-7.21	8.28e-06	0.0011	4.01
16775014	CKAP2	-0.555	9.61	-7.23	8e-06	0.0011	4.04
16871359	DMKN	0.579	7.47	7.21	8.28e-06	0.0011	4.01
17085545	LOC100133920	0.585	7.54	7.21	8.29e-06	0.0011	4
17119888	ICMT-DT	0.738	7.1	7.23	8.08e-06	0.0011	4.03
16736891	KIF18A	-0.65	9.84	-7.21	8.68e-06	0.00113	3.96
17120246	LOC100288175	0.509	9.4	7.18	8.67e-06	0.00113	3.96
16830173	PIMREG	-0.567	8.61	-7.08	1e-05	0.00124	3.82
17016369	H2BC3	-0.955	7.91	-7.1	1.01e-05	0.00124	3.82
17005774	LINC00240	0.689	7.37	7.07	1.02e-05	0.00124	3.8
16778611	CCDC122	0.692	7.63	7.04	1.06e-05	0.00128	3.76
16745503	BLID	-0.577	9.64	-6.99	1.16e-05	0.00136	3.68
16790673	CDH24	0.694	8.54	6.97	1.2e-05	0.0014	3.65
16914315	UBE2C	-0.523	9.31	-6.93	1.23e-05	0.00143	3.62
17082132	NAPRT	-0.518	8.23	-6.93	1.25e-05	0.00144	3.6
16671653	SLC50A1	0.541	10.3	6.92	1.27e-05	0.00145	3.59
16839732	TRPV1	0.642	7.98	6.91	1.28e-05	0.00145	3.58
16919072	MROH8	0.638	7.55	6.9	1.3e-05	0.00148	3.56
16961003	TRIM59	-0.565	6.99	-6.89	1.31e-05	0.00148	3.55
16709405	PLEKHS1	-0.597	7.55	-6.87	1.36e-05	0.00152	3.52
16711881	BEND7	-0.568	8.56	-6.84	1.41e-05	0.00155	3.48
16771417	OASL	0.575	8.79	6.84	1.41e-05	0.00155	3.48
16707221	KIF20B	-0.611	9.85	-6.78	1.61e-05	0.0017	3.36
17122474	MIR4435-2HG	-0.523	9.64	-6.74	1.65e-05	0.00173	3.33
16810585	PIF1	-0.662	7.05	-6.71	1.72e-05	0.00176	3.29
16926942	USP18	0.562	8.41	6.69	1.77e-05	0.00178	3.26
16968331	FGF5	-0.618	9.52	-6.72	1.77e-05	0.00178	3.27
16951990	SUSD5	-0.607	7.97	-6.65	1.89e-05	0.00187	3.2
16953121	SNORD13P3	0.545	8.03	6.61	1.99e-05	0.00192	3.14
16670574	ECM1	0.649	8.82	6.6	2.08e-05	0.00198	3.1
17016360	H4C2	-0.758	7.87	-6.6	2.12e-05	0.002	3.09
16842812	TLCD1	0.593	8.8	6.53	2.27e-05	0.00209	3.02
16872926	PSG5	0.588	7.64	6.52	2.29e-05	0.00209	3.01
16763577	SLC38A4	-0.82	7.2	-6.52	2.35e-05	0.0021	2.99
16798919	ARHGAP11A	-0.509	10.3	-6.51	2.36e-05	0.0021	2.98
17023987	LOC644135	0.992	7.88	6.5	2.46e-05	0.00217	2.94
16884426	FBLN7	0.531	7.57	6.44	2.57e-05	0.00221	2.89
16955645	FHIT	-0.525	7.88	-6.43	2.62e-05	0.00222	2.87
16688506	NEGR1	-0.879	8.29	-6.44	2.67e-05	0.00226	2.86
16667094	EPHX4	-0.576	7.72	-6.41	2.69e-05	0.00227	2.85
16854202	ABHD3	0.536	9.42	6.4	2.78e-05	0.0023	2.82
16860308	LOC105372338	0.992	7.28	6.41	2.8e-05	0.0023	2.81
16662648	CDCA8	-0.862	10.4	-6.39	2.88e-05	0.00235	2.79
16945051	PLXNA1	-0.593	10.7	-6.39	2.88e-05	0.00235	2.78
16938973	APRG1	-0.524	8.34	-6.36	2.94e-05	0.00237	2.76
16985217	RNF180	-0.547	6.94	-6.33	3.04e-05	0.00242	2.73
16701921	LOC105376367	0.64	7.05	6.31	3.13e-05	0.00243	2.7
16789899	TTC5	-0.586	7.06	-6.3	3.2e-05	0.00246	2.68
16815090	CCNF	-0.579	8.13	-6.29	3.27e-05	0.00251	2.65
16735303	LOC283299	-1.12	6.84	-6.22	3.73e-05	0.00272	2.53
16979163	ARSJ	-0.582	8.87	-6.15	4.16e-05	0.00294	2.42
17010522	IRAK1BP1	-0.554	6.6	-6.13	4.19e-05	0.00295	2.41
16952280	SCN5A	-0.519	8.53	-6.1	4.35e-05	0.00299	2.37
17068064	LETM2	0.661	8.79	6.08	4.69e-05	0.00315	2.3
17125034	ASNS	-0.648	7.17	-6.02	4.93e-05	0.00323	2.25
16723318	PRRG4	0.586	7.21	6.02	4.98e-05	0.00324	2.24
16918996	SOGA1	-0.566	8.78	-6.01	5.12e-05	0.00328	2.21
16678114	EPHX1	0.539	9.36	5.94	5.81e-05	0.00354	2.09
16798812	LOC100288637	-0.628	7.87	-5.92	5.9e-05	0.00357	2.07
16831313	MGC12916	-0.518	7.74	-5.9	6.04e-05	0.00364	2.05
16904551	GALNT3	-0.512	8.04	-5.87	6.27e-05	0.00371	2.01
17059911	PON3	0.585	7.53	5.81	6.92e-05	0.00398	1.91
16723120	METTL15	-0.735	7.29	-5.8	7.32e-05	0.00412	1.86
16913681	FAM83D	-0.862	10.5	-5.79	7.39e-05	0.00414	1.85
17084866	GLIPR2	0.729	7.64	5.74	8.02e-05	0.00433	1.77
17098027	STOM	0.586	9.84	5.73	8.2e-05	0.00436	1.75
16674604	MR1	0.773	8.07	5.72	8.23e-05	0.00437	1.74
16825602	DOC2A	0.639	7.54	5.71	8.31e-05	0.00437	1.73
16874012	CA11	0.958	7.54	5.68	8.78e-05	0.00452	1.68
16984905	IL31RA	-0.512	8.22	-5.61	9.69e-05	0.00487	1.58
16991859	HMMR	-0.753	7.57	-5.59	0.000102	0.00506	1.53
17091299	DIPK1B	-0.503	7.42	-5.55	0.000106	0.00521	1.49
17010246	KCNQ5	-0.732	8.39	-5.55	0.000109	0.00532	1.47
16915541	CDH4	-0.546	8.01	-5.53	0.000111	0.00538	1.45
16793661	LINC01303	0.524	7.13	5.5	0.000116	0.00554	1.4
16807098	MIR3942	-0.746	7.37	-5.51	0.000117	0.00557	1.39
16663514	CDC20	-0.797	11.6	-5.45	0.000129	0.00588	1.3
16967631	SLC4A4	-0.755	7.33	-5.43	0.000133	0.00593	1.27
16716371	CH25H	0.753	7.02	5.42	0.000137	0.00599	1.24
16837191	PITPNC1	-0.623	9.19	-5.38	0.000145	0.00614	1.18
16707567	FFAR4	-0.684	6.75	-5.35	0.00015	0.00627	1.15
16803642	MINAR1	-0.565	6.94	-5.32	0.000156	0.00649	1.1
16887259	BBS5	-0.508	7.31	-5.31	0.000158	0.00656	1.09
16967684	ANKRD17-DT	0.513	7.07	5.29	0.000165	0.00674	1.05
16917061	FERMT1	-0.573	8.42	-5.3	0.000166	0.00675	1.05
17100810	LOC100507412	-0.735	7.47	-5.27	0.000175	0.00701	0.993
17023646	CCN2	-0.832	11.2	-5.24	0.000182	0.00715	0.958
16795791	LINC02321	0.702	7.3	5.23	0.000185	0.00715	0.941
16725041	FAM111B	0.686	10	5.22	0.000191	0.00728	0.909
16873826	PLA2G4C	0.805	6.7	5.18	0.000202	0.00761	0.854
17016486	H2BC13	-0.692	7.78	-5.11	0.000227	0.00824	0.735
16942935	ZNF654	-0.522	8.65	-5.09	0.000237	0.00842	0.693
16877956	CENPA	-0.544	9.66	-5.05	0.000253	0.00881	0.628
16786264	ACOT4	0.609	7.99	5.05	0.000254	0.00882	0.624
16726790	POLA2	0.671	8.98	5.03	0.00026	0.00889	0.599
17020118	CILK1	-0.54	10.9	-4.96	0.000293	0.00964	0.482
17000439	CDC25C	-0.527	7.9	-4.92	0.000314	0.0101	0.41
16997676	MTRNR2L2	0.588	9.26	4.92	0.000315	0.0101	0.408
16804559	FANCI	0.574	10.6	4.91	0.000324	0.0103	0.382
16949780	ATP13A3-DT	0.62	7.44	4.87	0.000342	0.0105	0.328
16793125	LINC02331	-0.557	6.98	-4.85	0.000351	0.0107	0.298
16979917	SLC7A11	-0.844	9.63	-4.8	0.00039	0.0114	0.197
16984010	IL7R	0.555	8.76	4.78	0.000404	0.0115	0.162
16711987	CDNF	0.506	7.39	4.76	0.000412	0.0116	0.138
17087413	GALNT12	0.67	7.96	4.74	0.000429	0.012	0.101
16735317	OR5P2	-1.01	7.24	-4.72	0.000451	0.0123	0.0521
17097955	C5	0.653	7.31	4.71	0.000459	0.0124	0.0351
16690535	PSRC1	-0.547	6.74	-4.69	0.000464	0.0125	0.0205
16732584	SORL1	-0.672	7.64	-4.64	0.000514	0.0133	-0.0785
16749105	PYROXD1	-0.503	6.89	-4.63	0.000515	0.0133	-0.0854
17093245	AQP3	0.524	7.84	4.62	0.00053	0.0135	-0.109
16793176	GCH1	0.669	8.13	4.62	0.000537	0.0136	-0.121
16843429	SLFN13	0.502	9.66	4.61	0.000546	0.0137	-0.139
17046586	SNORA22	0.887	10.3	4.54	0.000612	0.0147	-0.252
16785048	LINC03033	0.515	11.4	4.53	0.000628	0.0149	-0.278
16914171	PI3	0.895	8.04	4.51	0.000649	0.0152	-0.31
16676682	IL24	1.31	8.43	4.51	0.000652	0.0152	-0.314
16892745	LINC01173	0.757	6.95	4.46	0.000708	0.0158	-0.397
16724633	PTPRJ	-0.524	10.7	-4.46	0.000715	0.0159	-0.407
16757493	SDSL	0.501	8.86	4.44	0.000738	0.0162	-0.438
16787814	IFI27	0.832	8.81	4.44	0.000743	0.0163	-0.444
17005858	H2AC13	-0.63	9.38	-4.41	0.00077	0.0166	-0.48
17068296	IDO1	1	6.77	4.3	0.000952	0.0187	-0.691
17080595	DSCC1	0.718	8.37	4.29	0.000964	0.0188	-0.703
16996545	DEPDC1B	-0.501	9.16	-4.28	0.000979	0.019	-0.719
16901755	BUB1	-0.639	10.7	-4.28	0.000987	0.0191	-0.727
16781168	LOC102725228	0.509	6.99	4.26	0.00101	0.0194	-0.749
17124088	SH3TC2-DT	-0.554	7.16	-4.25	0.00103	0.0197	-0.769
17097636	TEX48	0.561	7.29	4.24	0.00106	0.02	-0.797
17080648	HAS2	-0.58	10	-4.23	0.00107	0.0201	-0.81
17012946	TNFAIP3	0.561	10.2	4.19	0.00115	0.0208	-0.883
17005865	H2BC14	-1.19	12.1	-4.15	0.00124	0.0217	-0.955
16785127	RHOJ	-0.82	7.93	-4.13	0.00128	0.0222	-0.986
16900136	IGKC	-0.606	8.14	-4.12	0.00132	0.0226	-1.01
17105284	DIAPH2	-0.505	9.45	-4.1	0.00137	0.023	-1.05
17125352	LOC107984035	-0.73	6.52	-4.07	0.00144	0.0238	-1.1
17011217	GRIK2	-0.858	7.76	-4.01	0.0016	0.0252	-1.21
16873087	KCNN4	-0.588	8.82	-4.01	0.00161	0.0253	-1.21
16737841	SNORD67	-0.641	9.23	-3.99	0.00167	0.0258	-1.25
16937503	EMC3-AS1	0.576	9.1	3.99	0.00167	0.0258	-1.25
16766318	PRIM1	0.579	9.44	3.99	0.00168	0.0258	-1.25
16931225	RIBC2	0.519	7.11	3.96	0.00178	0.0268	-1.31
16681288	TNFRSF9	0.787	8.85	3.92	0.00189	0.0278	-1.37
16775811	GPC6	-0.822	7.99	-3.9	0.00195	0.0285	-1.4
17072104	SAMD12-AS1	-0.566	6.9	-3.9	0.00196	0.0286	-1.41
16735288	OVCH2	-0.696	7.03	-3.88	0.00202	0.0291	-1.44
16689020	MCOLN3	0.63	7.7	3.87	0.00208	0.0297	-1.47
16735321	OR5P3	-0.758	7.3	-3.86	0.00212	0.03	-1.49
17112560	NAP1L3	-0.676	6.86	-3.85	0.00214	0.0302	-1.5
16970435	SPRY1	-0.524	8.14	-3.85	0.00217	0.0304	-1.51
16977058	CXCL11	1.04	11.5	3.84	0.00219	0.0306	-1.52
16915712	SLCO4A1	-0.925	7.74	-3.8	0.00237	0.0321	-1.6
16833327	SLFN5	0.631	10.7	3.79	0.00241	0.0325	-1.61
16849274	ST6GALNAC2	0.574	8.23	3.74	0.00266	0.0347	-1.71
16908832	MIR3132	0.548	7.22	3.66	0.00307	0.0374	-1.85
17035371	HCP5	0.614	10.1	3.65	0.00316	0.038	-1.88
16802102	RNU5B-1	0.619	9.07	3.64	0.0032	0.0383	-1.89
17124516	LOC100128885	0.612	7.87	3.63	0.00325	0.0386	-1.91
17075973	DUSP4	-0.542	10.3	-3.59	0.00347	0.0401	-1.97
16995177	PRLR	0.694	6.95	3.57	0.00363	0.0414	-2.02
16875763	UBE2S	-0.537	8.07	-3.52	0.00397	0.044	-2.1
17002667	INSYN2B	-0.591	8.68	-3.5	0.00415	0.045	-2.15
16671642	EFNA1	0.5	7.43	3.48	0.0043	0.0461	-2.18
17113928	TENM1	-0.653	7.47	-3.48	0.00432	0.0461	-2.19
16783927	KLHDC1	0.511	8.79	3.44	0.00463	0.0482	-2.25

## Sheet: Table S26.GEO2R_GSE113427_all
Supplementary Table S26. List of all DEGs detected by GEO2R using GSE113427 dataset
Legend: ID, the ID of the probe for GPL16686 ([HuGene-2_0-st] Affymetrix Human Gene 2.0 ST Array [transcript (gene) version]); adj.P.Val, the p-value after the selected form of adjustment for multiple testing; P.Value, the p-value obtained from the moderated t-statistic; t, the moderated t-statistic, i.e., the ratio of the log2-fold change to its standard error; ; B, the B-statistic or log-odds t…
ID	adj.P.Val	P.Value	t	B	logFC
16989636	0.00134	2.5e-08	-17.6723	7.96981	-1.28778
16817017	0.0029	1.08e-07	-14.955	7.14197	-1.41074
17126284	0.00386	2.16e-07	13.8152	6.70745	1.09511
16948063	0.0069	5.15e-07	-12.494	6.12126	-0.958765
16697695	0.00765	8.29e-07	-11.8201	5.78245	-1.12295
16777185	0.00765	1e-06	-11.5633	5.64543	-1.34229
16992524	0.00765	1.07e-06	11.4654	5.592	1.1685
16655549	0.00765	1.14e-06	-11.385	5.54763	-0.967777
16939637	0.00821	1.5e-06	-11.0257	5.34336	-0.790992
16910552	0.00821	1.62e-06	-10.9281	5.28623	-0.940797
16688386	0.00821	1.77e-06	-10.8113	5.21684	-0.948483
16783047	0.00821	1.84e-06	-10.7635	5.18814	-0.965612
16658589	0.01009	2.91e-06	10.1934	4.83144	1.10117
16818359	0.01009	2.97e-06	-10.1696	4.81595	-0.740062
16864275	0.01009	3e-06	10.1552	4.80658	0.685357
16699634	0.01009	3.13e-06	10.1048	4.77353	0.8041
16679785	0.01009	3.27e-06	-10.051	4.73808	-1.64227
16829738	0.01009	3.39e-06	-10.0095	4.71049	-0.715418
16761518	0.01032	3.73e-06	-9.89332	4.63253	-0.763692
16665960	0.01032	3.85e-06	-9.85752	4.60825	-0.939558
16779444	0.01032	4.13e-06	-9.77336	4.55073	-0.724662
16761502	0.01032	4.39e-06	-9.70449	4.50317	-0.701133
16679791	0.01032	4.43e-06	-9.69385	4.49578	-2.45798
17084603	0.01083	4.85e-06	9.58819	4.42185	0.652948
17122478	0.01089	5.08e-06	-9.535	4.38422	-0.721293
16985599	0.01208	5.95e-06	-9.35525	4.25506	-0.884018
17122476	0.01208	6.12e-06	-9.32323	4.23172	-0.732838
17070769	0.01208	6.36e-06	-9.27924	4.19948	-0.80692
17110367	0.01208	6.59e-06	-9.24012	4.17065	-0.649988
16834931	0.01208	6.76e-06	-9.21206	4.14988	-0.781238
17118048	0.01214	7.02e-06	-9.16933	4.11809	-0.7413
16682039	0.01269	8.55e-06	8.95203	3.95355	0.89718
16946900	0.01269	9.03e-06	-8.8931	3.90807	-0.723633
16735592	0.01269	9.28e-06	-8.8633	3.88494	-0.69177
17120758	0.01269	9.28e-06	8.86324	3.8849	0.776783
16656657	0.01269	9.39e-06	-8.85046	3.87495	-0.634888
16658750	0.01269	9.45e-06	8.84425	3.8701	0.606607
17048538	0.01269	9.45e-06	8.84392	3.86985	0.61792
16684080	0.01269	9.6e-06	8.82694	3.85658	0.89781
16784215	0.01269	9.7e-06	8.81586	3.84792	0.658743
17016509	0.01269	9.7e-06	-8.81568	3.84778	-0.95624
16959531	0.01357	1.08e-05	-8.7015	3.75767	-0.575015
16669630	0.01357	1.12e-05	-8.66667	3.7299	-1.08465
17053535	0.01357	1.13e-05	8.65468	3.7203	0.664435
16684194	0.01357	1.14e-05	8.6449	3.71247	0.804697
16789899	0.01382	1.19e-05	-8.60249	3.67837	-0.583828
16694033	0.01407	1.23e-05	8.56089	3.64474	0.652168
16903327	0.01712	1.54e-05	-8.33137	3.45563	-0.60412
16934671	0.01712	1.59e-05	8.29867	3.42819	0.522927
17122498	0.01712	1.67e-05	-8.24912	3.38639	-0.65575
17119888	0.01712	1.68e-05	8.24028	3.3789	0.741045
17017290	0.01712	1.7e-05	8.22752	3.36808	0.54163
17034403	0.01712	1.7e-05	8.22752	3.36808	0.54163
16698984	0.01712	1.78e-05	-8.18415	3.33114	-0.7769
16901799	0.01712	1.82e-05	-8.15824	3.30897	-0.71518
17120248	0.01712	1.83e-05	8.15247	3.30402	0.65316
16650479	0.01712	1.84e-05	-8.15102	3.30277	-0.914365
16702254	0.01712	1.85e-05	-8.14211	3.29512	-0.563303
17053329	0.01713	1.89e-05	8.12412	3.27965	0.898748
16697544	0.01733	1.97e-05	-8.07924	3.24087	-0.8394
16731490	0.01733	1.97e-05	-8.07876	3.24044	-1.22579
16692583	0.01797	2.08e-05	-8.02612	3.19465	-0.793133
16947087	0.01848	2.18e-05	-7.97787	3.15238	-0.62919
16778611	0.01848	2.3e-05	7.92663	3.10718	0.695795
17059828	0.01848	2.38e-05	7.89252	3.07691	0.73066
16793225	0.01848	2.38e-05	-7.88992	3.0746	-0.717025
16969911	0.01848	2.42e-05	-7.8765	3.06264	-0.513555
16657403	0.01848	2.42e-05	-7.87624	3.06241	-0.867003
16953121	0.01848	2.45e-05	7.8648	3.0522	0.550245
16973753	0.01848	2.45e-05	-7.86421	3.05167	-0.933312
16761498	0.01852	2.49e-05	-7.84562	3.03505	-0.981598
16761495	0.01852	2.54e-05	-7.82611	3.01756	-1.41603
17039446	0.01852	2.59e-05	7.80829	3.00155	0.526022
17041929	0.01852	2.59e-05	7.80829	3.00155	0.526022
16775324	0.01974	2.8e-05	-7.73377	2.93413	-0.764643
16717235	0.02043	2.93e-05	7.6878	2.89219	0.716207
17029148	0.0206	3.06e-05	7.64748	2.85519	0.527752
16978568	0.0206	3.09e-05	-7.63863	2.84704	-0.982337
16798810	0.0206	3.09e-05	-7.63756	2.84605	-0.847498
16653887	0.0206	3.11e-05	-7.63068	2.83971	-1.36157
17117682	0.02083	3.19e-05	7.60845	2.81917	0.696503
16874012	0.02156	3.34e-05	7.56387	2.77779	0.959782
16909822	0.02157	3.38e-05	7.55213	2.76685	0.571322
16900931	0.02245	3.56e-05	7.50251	2.72041	0.56775
16952782	0.02245	3.6e-05	7.49174	2.71029	0.50865
16920548	0.02247	3.65e-05	-7.4798	2.69905	-0.73541
17122486	0.02406	3.95e-05	-7.40458	2.62782	-0.612422
16803642	0.02406	3.99e-05	-7.39402	2.61776	-0.564207
17036651	0.02434	4.09e-05	7.37281	2.5975	0.552802
16972748	0.02441	4.22e-05	-7.34298	2.56892	-0.613023
17097211	0.02441	4.34e-05	7.31717	2.5441	0.514243
16974722	0.02441	4.36e-05	-7.31194	2.53906	-0.622625
16914374	0.02441	4.4e-05	-7.30308	2.5305	-0.529268
16959575	0.02441	4.41e-05	-7.30059	2.5281	-0.977085
16774053	0.02441	4.42e-05	-7.30026	2.52778	-0.641555
16780891	0.02455	4.49e-05	-7.28531	2.51333	-0.792338
17010550	0.02529	4.67e-05	-7.24849	2.47759	-0.559567
16657155	0.02705	5.04e-05	-7.17734	2.40803	-0.863032
16882786	0.02734	5.27e-05	-7.13801	2.36928	-0.541227
16842237	0.02734	5.46e-05	-7.10492	2.33651	-0.967008
16850216	0.02734	5.47e-05	7.10313	2.33473	0.55919
17109326	0.02734	5.51e-05	7.09741	2.32905	0.83429
16845349	0.02734	5.52e-05	7.09571	2.32736	0.66382
17081347	0.02734	5.55e-05	-7.09025	2.32193	-1.02607
16667094	0.02734	5.55e-05	-7.08999	2.32168	-0.572625
16859205	0.02734	5.6e-05	7.08273	2.31445	0.966117
16922459	0.02734	5.66e-05	7.07238	2.30414	0.848278
16745503	0.02734	5.7e-05	-7.06575	2.29753	-0.572558
16986501	0.02734	5.71e-05	-7.06434	2.29612	-0.61342
16938527	0.02911	6.13e-05	-6.99948	2.23108	-0.57822
16961003	0.02919	6.21e-05	-6.98911	2.22063	-0.56047
16839732	0.02959	6.42e-05	6.95887	2.19007	0.64624
16991741	0.02959	6.53e-05	-6.943	2.17398	-0.670987
17124046	0.02959	6.55e-05	-6.94054	2.17148	-0.981515
16871359	0.02959	6.56e-05	6.93892	2.16982	0.581455
16872915	0.02959	6.63e-05	6.92999	2.16076	0.68211
16799411	0.02959	6.68e-05	6.92339	2.15404	0.671157
16701921	0.02975	6.77e-05	6.91121	2.14162	0.64308
17082132	0.03135	7.31e-05	-6.84288	2.07162	-0.515208
16709405	0.0315	7.42e-05	-6.83009	2.05845	-0.595105
16761507	0.0315	7.64e-05	-6.80417	2.03167	-0.592333
16987008	0.03176	7.83e-05	-6.78181	2.00849	-0.62955
16694036	0.03176	7.85e-05	6.78006	2.00667	0.502883
17070061	0.03176	7.9e-05	6.77477	2.00117	0.668
16670183	0.03176	7.94e-05	-6.77008	1.9963	-0.968932
16723120	0.03203	8.1e-05	-6.75201	1.97749	-0.736272
16669785	0.03203	8.12e-05	-6.7497	1.97508	-0.900118
17070749	0.03213	8.21e-05	-6.74045	1.96543	-0.553813
16777549	0.03242	8.36e-05	-6.72479	1.94906	-0.533757
16755692	0.03242	8.53e-05	-6.70746	1.9309	-0.764265
16872926	0.03242	8.53e-05	6.70738	1.93082	0.592588
16949780	0.03363	8.98e-05	6.66235	1.88344	0.623045
16671653	0.03363	9.05e-05	6.65489	1.87556	0.544493
16721835	0.03363	9.08e-05	-6.65266	1.87321	-0.5298
17066203	0.03363	9.09e-05	6.65118	1.87163	0.712635
17016360	0.03395	9.3e-05	-6.63212	1.85146	-0.754373
17009446	0.03395	9.31e-05	6.63098	1.85026	0.882713
16785629	0.03461	9.62e-05	-6.60259	1.8201	-0.79299
16842812	0.03482	9.78e-05	6.58831	1.80488	0.598383
17124810	0.03482	9.81e-05	6.58576	1.80217	1.06176
16705661	0.03496	0.0001	-6.56812	1.78333	-0.53181
17120246	0.03496	0.000101	6.56048	1.77516	0.51359
16718381	0.03496	0.000101	6.55711	1.77154	0.500705
16913681	0.03509	0.000103	-6.54015	1.75335	-0.857873
16745139	0.03521	0.000104	6.53179	1.74438	0.822307
16855600	0.03573	0.000107	-6.51393	1.72516	-0.570067
16790673	0.03578	0.000107	6.50733	1.71804	0.698527
17059911	0.03662	0.000112	6.47491	1.683	0.588952
17110289	0.03662	0.000112	6.47081	1.67856	0.877615
16830173	0.03662	0.000113	-6.46189	1.66889	-0.563893
16839757	0.03662	0.000113	6.46129	1.66823	0.62668
16835586	0.03727	0.000117	6.43112	1.63542	0.548362
16968339	0.03731	0.000119	-6.42272	1.62626	-0.56384
16800836	0.03802	0.000122	6.39946	1.60085	0.757925
17006878	0.0384	0.000126	6.37271	1.57151	0.509145
16967684	0.0384	0.000127	6.36329	1.56115	0.514903
16971943	0.0384	0.000129	6.35234	1.5491	0.51034
16809093	0.0384	0.000129	-6.3495	1.54597	-0.555832
17121496	0.0384	0.000131	-6.34123	1.53685	-0.517803
17085545	0.0384	0.000131	6.33766	1.53291	0.588485
16951990	0.0384	0.000132	-6.32993	1.52437	-0.606165
16656659	0.0384	0.000134	-6.31957	1.51292	-0.6959
16706236	0.0384	0.000135	-6.31305	1.5057	-0.735093
17008592	0.0384	0.000135	6.31163	1.50412	0.555375
16938269	0.0384	0.000136	-6.3107	1.50309	-0.918725
16651367	0.0384	0.000136	-6.30937	1.50162	-0.523497
17068064	0.0384	0.000136	6.30563	1.49747	0.66559
16979163	0.0384	0.000137	-6.29957	1.49075	-0.579255
17046524	0.0384	0.000138	6.29483	1.48549	0.82339
17123974	0.0384	0.000138	6.29268	1.4831	0.6746
16880291	0.0384	0.000139	6.29159	1.48189	0.68131
16711881	0.0384	0.000139	-6.28966	1.47974	-0.564963
16942270	0.03866	0.000141	-6.2798	1.46878	-0.562603
16775014	0.03894	0.000143	-6.26598	1.45339	-0.548972
16810585	0.0397	0.000148	-6.2366	1.42056	-0.662122
16938973	0.03974	0.000151	-6.21774	1.39942	-0.520905
17120692	0.03974	0.000154	6.20537	1.38553	0.541172
16657095	0.03974	0.000156	-6.19422	1.37299	-0.74895
17124286	0.03974	0.000156	6.19178	1.37024	0.699087
17012859	0.03974	0.000157	-6.18829	1.36631	-0.57702
16692555	0.03974	0.000158	-6.18209	1.35932	-0.76518
17111738	0.03974	0.000159	-6.17686	1.35342	-0.501895
17001155	0.03974	0.00016	-6.17299	1.34905	-0.655895
16968765	0.03974	0.00016	6.17184	1.34776	0.68943
17010522	0.03974	0.000163	-6.15897	1.3332	-0.552342
16692557	0.03974	0.000163	-6.15688	1.33084	-0.724032
17094598	0.03974	0.000163	-6.15677	1.33072	-0.850413
17057892	0.03996	0.000167	6.13742	1.30879	0.796285
17120968	0.04027	0.00017	-6.12436	1.29396	-0.66652
17020703	0.04048	0.000172	-6.11214	1.28005	-0.552485
16791960	0.04061	0.000175	6.0989	1.26496	0.559218
16655531	0.04061	0.000175	-6.0988	1.26485	-0.957723
16745501	0.04096	0.000177	-6.08812	1.25265	-0.762158
17005774	0.04116	0.000179	6.08075	1.24423	0.692547
16793661	0.04156	0.000183	6.06213	1.22292	0.5254
17018728	0.04156	0.000184	6.05954	1.21994	0.594058
16786264	0.04156	0.000184	6.05607	1.21596	0.613478
16707221	0.04156	0.000187	-6.04361	1.20165	-0.605328
16885853	0.04156	0.000187	-6.04305	1.20101	-1.08771
16949449	0.04156	0.000188	6.04066	1.19826	0.58251
16825602	0.04156	0.00019	6.02939	1.18529	0.641615
17098027	0.04156	0.000191	6.02873	1.18454	0.592325
16832031	0.04156	0.000192	-6.02182	1.17657	-0.76605
16723318	0.04156	0.000194	6.01308	1.16649	0.588812
16832005	0.04156	0.000195	-6.01101	1.1641	-0.767775
16842215	0.04156	0.000195	-6.01101	1.1641	-0.767775
16955645	0.04156	0.000195	-6.01012	1.16307	-0.5212
16757493	0.04156	0.000196	6.00555	1.15779	0.504223
16983597	0.04156	0.000196	-6.00468	1.15678	-0.646652
16926942	0.04156	0.000197	6.00046	1.15191	0.566875
16854202	0.04156	0.000198	5.99615	1.14693	0.540565
16670574	0.04174	0.0002	5.98955	1.13929	0.653162
16662648	0.04189	0.000202	-5.98141	1.12986	-0.85708
16668079	0.04293	0.000209	-5.95431	1.09839	-0.526332
17004744	0.04351	0.000213	-5.94039	1.08218	-0.583
16655611	0.04356	0.000215	-5.93014	1.07022	-0.717425
17123178	0.04376	0.000217	5.92347	1.06244	0.539665
17016490	0.04406	0.00022	-5.91137	1.04829	-1.11735
17122028	0.04448	0.000224	5.89693	1.03137	0.57844
16653285	0.04573	0.000235	-5.86157	0.989811	-0.522075
16653387	0.04573	0.000235	-5.86157	0.989811	-0.522075
17122640	0.04586	0.000237	-5.85213	0.97869	-0.722595
16889251	0.04586	0.000238	-5.85049	0.976751	-0.64125
17100810	0.04627	0.000242	-5.8358	0.959401	-0.730985
17122494	0.04824	0.000258	-5.78526	0.899448	-0.662798
16900018	0.04824	0.00026	-5.78008	0.89328	-0.746923
16655843	0.04824	0.000261	-5.77522	0.887494	-1.1836
16861997	0.04824	0.000262	5.77396	0.885985	0.514073
17080071	0.04824	0.000263	5.77186	0.883481	0.66759
16945051	0.04824	0.000263	-5.76944	0.880597	-0.5879
16798919	0.04824	0.000264	-5.76862	0.879625	-0.503795
16716371	0.04841	0.000268	5.75562	0.864096	0.754923
16723148	0.04841	0.000268	-5.75542	0.863861	-0.980185
16780151	0.04841	0.000268	-5.75511	0.863485	-1.25333
17122474	0.04841	0.000269	-5.75225	0.860073	-0.519395
16705448	0.04841	0.00027	5.7498	0.857145	1.02393
17023484	0.04866	0.000274	-5.7378	0.842783	-0.525135
16854592	0.04885	0.000277	-5.72941	0.832725	-0.571535
16997676	0.04885	0.000279	5.72439	0.826693	0.59392
16919072	0.04915	0.000283	5.71185	0.811636	0.642417
16655601	0.04921	0.000285	-5.70835	0.807429	-0.589902
16653293	0.04943	0.000289	-5.69479	0.791101	-0.527168
16653395	0.04943	0.000289	-5.69479	0.791101	-0.527168

## Sheet: Table S27.CARMA_GSE113427_all
Supplementary Table S27. List of all DEGs detected by CARMAweb using GSE113427 dataset
Legend: probeset, the ID of the probe for GPL16686 ([HuGene-2_0-st] Affymetrix Human Gene 2.0 ST Array [transcript (gene) version]); rawp, the p-value obtained from the moderated t-statistic; BH, the p-value after the application of Bonferroni& Hochberg FDR adjustment method for multiple testing; meanM, the average log-ratios of the expression levels; meanA, the average expression levels of a gene
probeset_id	rawp	BH	meanM	meanA
ENSG00000012048_at	1.97e-05	0.0143587	0.726469	8.87265
ENSG00000024526_at	1.87e-07	0.00148373	-0.943745	9.6605
ENSG00000040531_at	2.61e-06	0.00552912	-0.681038	8.41966
ENSG00000063180_at	3.01e-05	0.0164685	0.975347	7.67206
ENSG00000066279_at	1.07e-05	0.0125341	-0.834541	10.4228
ENSG00000069535_at	4.52e-05	0.0207263	0.910045	6.09407
ENSG00000072571_at	0.000393785	0.043794	-0.690454	7.90047
ENSG00000078081_at	0.000132932	0.0282207	0.52689	6.57158
ENSG00000080493_at	0.000369549	0.0427813	-0.755091	7.45507
ENSG00000087586_at	6.48e-05	0.0236311	-0.73726	9.26692
ENSG00000092140_at	6.61e-07	0.00262017	-0.912704	10.0509
ENSG00000101353_at	6.22e-05	0.0232194	0.666216	7.63121
ENSG00000101447_at	0.000119472	0.0277365	-0.855239	10.5831
ENSG00000102174_at	0.000310705	0.039606	-0.572485	5.75667
ENSG00000104432_at	0.000394864	0.043794	-0.562057	6.33608
ENSG00000105825_at	1.72e-05	0.0139196	0.738496	10.0286
ENSG00000105852_at	9.38e-05	0.0262689	0.575581	7.62239
ENSG00000106853_at	1.86e-05	0.0140418	0.53279	9.62035
ENSG00000112984_at	2.25e-08	0.000714492	-1.31014	10.3261
ENSG00000113231_at	2.79e-05	0.0164685	-0.626897	6.4005
ENSG00000114554_at	0.000146076	0.0284266	-0.610115	10.72
ENSG00000114812_at	1.27e-06	0.00380599	-0.766325	8.76772
ENSG00000117650_at	1.52e-05	0.0137489	-0.771429	9.05965
ENSG00000118007_at	1.73e-05	0.0139196	-0.532407	8.73532
ENSG00000118193_at	4.36e-07	0.00251148	-1.11434	9.82162
ENSG00000119986_at	1.8e-05	0.0139196	0.728588	9.83421
ENSG00000120656_at	9.37e-06	0.0118942	0.795765	7.41214
ENSG00000121621_at	0.000236387	0.0355932	-0.6412	9.95367
ENSG00000121957_at	0.000193135	0.0317423	-0.50827	9.41189
ENSG00000121964_at	5.43e-05	0.022823	-0.579736	7.85509
ENSG00000126562_at	1.42e-05	0.0137489	0.596986	6.7285
ENSG00000126709_at	7.61e-06	0.0102105	0.894641	9.40626
ENSG00000126787_at	1.75e-05	0.0139196	-0.715326	11.0024
ENSG00000127995_at	4.09e-06	0.00724273	0.653464	9.26651
ENSG00000128016_at	0.000157045	0.028962	0.509815	8.80446
ENSG00000128311_at	1.29e-05	0.0136155	0.50994	10.1525
ENSG00000130208_at	0.000101784	0.0270312	0.715241	6.81153
ENSG00000132635_at	1.79e-05	0.0139196	0.518031	9.26048
ENSG00000133101_at	4.69e-05	0.0207263	-0.65729	7.84344
ENSG00000134057_at	5.1e-06	0.00808576	-0.859522	9.14667
ENSG00000134690_at	0.000201195	0.0320201	-0.849274	10.3187
ENSG00000135378_at	0.000283917	0.0386517	0.535862	7.3124
ENSG00000135951_at	3.02e-05	0.0164685	0.578988	7.95142
ENSG00000136100_at	1.32e-06	0.00380599	-0.744713	7.59736
ENSG00000136108_at	0.000122611	0.0277807	-0.529923	9.66075
ENSG00000136122_at	2.6e-05	0.0164685	-0.755583	8.5973
ENSG00000136319_at	0.00021069	0.0330636	-0.56158	7.46368
ENSG00000138135_at	0.000194403	0.031769	0.704927	7.02382
ENSG00000138182_at	0.000159875	0.0290734	-0.609137	9.95932
ENSG00000138646_at	0.000113254	0.0276977	0.676351	8.72105
ENSG00000138675_at	0.000201636	0.0320201	-0.623478	9.51923
ENSG00000138778_at	2.07e-05	0.0143587	-0.97982	10.0594
ENSG00000139209_at	0.000174311	0.0305298	-0.833916	7.31287
ENSG00000139291_at	3.66e-05	0.0187047	-0.562806	7.39527
ENSG00000139354_at	9.27e-05	0.0262689	-0.74385	9.52841
ENSG00000139410_at	0.000121324	0.0277807	0.512084	8.87679
ENSG00000139505_at	0.000129792	0.0280069	-0.521	9.13395
ENSG00000139880_at	0.000103986	0.0272598	0.69945	8.59337
ENSG00000140451_at	4.74e-05	0.0207263	-0.653252	7.09596
ENSG00000140682_at	2.46e-06	0.00552912	-0.727001	8.97785
ENSG00000141574_at	4.76e-05	0.0207263	0.579041	9.41303
ENSG00000143369_at	0.000144756	0.0284266	0.651993	8.90636
ENSG00000144642_at	7.94e-05	0.0244599	-0.601268	8.20539
ENSG00000144724_at	0.000186251	0.0312587	-0.545651	9.79315
ENSG00000145715_at	5.94e-05	0.0228557	-0.621405	10.6592
ENSG00000146243_at	0.000102262	0.0270312	-0.539226	6.6404
ENSG00000146376_at	0.000262537	0.037012	-0.51452	9.91682
ENSG00000147003_at	9.52e-05	0.0262689	0.854653	7.20788
ENSG00000148175_at	0.000217115	0.0335945	0.578376	10.1567
ENSG00000148735_at	0.000166905	0.0297428	-0.59869	7.68376
ENSG00000149639_at	0.000361888	0.0426732	-0.538808	8.8173
ENSG00000149927_at	0.000495086	0.0490754	0.552264	7.46955
ENSG00000151773_at	1.26e-05	0.0136155	0.731887	7.66428
ENSG00000153294_at	0.000288	0.0388738	0.791314	6.75458
ENSG00000154217_at	0.000336548	0.0415381	-0.605858	9.16674
ENSG00000154589_at	0.000133452	0.0282207	0.634679	9.08953
ENSG00000154920_at	0.000156256	0.028962	0.51466	7.54488
ENSG00000155428_at	3.46e-05	0.0179884	0.89234	8.32414
ENSG00000157240_at	0.000459033	0.0471214	-0.512415	9.04318
ENSG00000158201_at	0.000176133	0.0305298	0.542082	9.47423
ENSG00000158406_at	0.00038676	0.0436014	0.616107	9.51159
ENSG00000159733_at	4.45e-05	0.0207263	-0.67226	7.4208
ENSG00000160606_at	6.78e-05	0.0241057	0.595165	8.79238
ENSG00000161249_at	2.37e-05	0.0155213	0.596717	7.67377
ENSG00000163535_at	0.000141335	0.0284266	-0.636288	9.23096
ENSG00000164161_at	0.000244023	0.0358352	-0.616095	6.4482
ENSG00000164509_at	0.000416911	0.0453623	-0.507393	8.17826
ENSG00000164611_at	3.42e-05	0.0179884	-0.710674	7.51861
ENSG00000165046_at	0.000117008	0.0276977	0.638208	8.91566
ENSG00000165071_at	2.01e-05	0.0143587	-1.02075	8.48632
ENSG00000165474_at	1.94e-06	0.00473024	-1.31072	8.25313
ENSG00000165626_at	0.000178593	0.0306215	-0.558295	9.32807
ENSG00000166483_at	0.000127426	0.0278756	-0.507465	10.5483
ENSG00000166851_at	4.84e-07	0.00251148	-1.38328	10.447
ENSG00000169169_at	9.93e-06	0.01212	0.640286	8.17339
ENSG00000169241_at	6.95e-05	0.0241057	0.519576	10.3969
ENSG00000169330_at	0.000313402	0.039606	-0.543141	6.81136
ENSG00000169760_at	5.54e-07	0.00251148	-0.90009	7.55958
ENSG00000171408_at	0.000127209	0.0278756	-0.547575	9.2744
ENSG00000172031_at	8.85e-05	0.0255188	-0.568934	7.81295
ENSG00000172965_at	1.42e-05	0.0137489	-0.633599	8.30704
ENSG00000173705_at	0.000340734	0.0416223	-0.553002	8.11249
ENSG00000174327_at	0.000159366	0.0290734	0.547341	8.31971
ENSG00000175841_at	0.000342522	0.0416223	0.73024	6.24618
ENSG00000177233_at	1.82e-06	0.00473024	-1.65453	6.63765
ENSG00000178177_at	7.71e-05	0.0244599	-0.589352	8.55912
ENSG00000180801_at	3.02e-05	0.0164685	-0.568985	8.90005
ENSG00000180998_at	7.29e-06	0.0102105	0.711323	7.76958
ENSG00000183287_at	4.33e-05	0.0207263	-0.572409	8.53017
ENSG00000183873_at	0.00031838	0.039917	-0.507225	8.57315
ENSG00000184922_at	4.34e-06	0.00724273	-0.766835	9.40387
ENSG00000184979_at	0.000113355	0.0276977	0.525969	8.53189
ENSG00000185130_at	0.000145204	0.0284266	-0.716252	7.74209
ENSG00000186188_at	8.33e-05	0.0249251	-0.649872	6.87397
ENSG00000186792_at	0.000387544	0.0436014	0.540767	7.72442
ENSG00000187229_at	0.000202504	0.0320201	0.682948	6.79276
ENSG00000187554_at	4.29e-06	0.00724273	0.813449	7.99152
ENSG00000188060_at	0.000361138	0.0426732	0.533372	6.86619
ENSG00000189057_at	0.000250706	0.0363055	0.691049	10.3297
ENSG00000189283_at	0.000128914	0.0280069	-0.519268	8.07721
ENSG00000197153_at	7.12e-05	0.0241057	-1.11856	7.64648
ENSG00000197467_at	0.000191049	0.0317014	-0.505453	8.62247
ENSG00000198590_at	3.77e-05	0.0189766	-0.52288	8.41087
ENSG00000199879_at	0.000242567	0.0358352	-0.850924	3.92476
ENSG00000199964_at	0.000248762	0.0361959	0.879702	6.3096
ENSG00000201558_at	7.77e-05	0.0244599	-0.953596	5.82398
ENSG00000204941_at	0.000191888	0.0317014	0.813255	8.01363
ENSG00000207205_at	0.000139104	0.0284266	-0.774409	8.35638
ENSG00000210181_at	0.000293947	0.0391764	0.707594	4.05957
ENSG00000211499_at	0.000254092	0.0363055	-0.961117	8.2097
ENSG00000213057_at	1.17e-05	0.0132326	-0.758652	6.32878
ENSG00000213199_at	1.62e-05	0.0139196	0.631637	7.6377
ENSG00000214049_at	1.46e-05	0.0137489	0.976151	10.5622
ENSG00000214954_at	2.76e-05	0.0164685	-0.663128	6.20361
ENSG00000223784_at	7.73e-06	0.0102105	-0.555497	8.49607
ENSG00000224477_at	0.000497308	0.0491421	-0.589133	4.4833
ENSG00000224843_at	6.84e-05	0.0241057	0.661444	7.49699
ENSG00000225077_at	5.89e-05	0.0228557	0.559509	7.11869
ENSG00000226423_at	0.000149652	0.0284617	-1.08898	5.30458
ENSG00000227634_at	1.1e-06	0.00380599	1.05145	8.58604
ENSG00000227681_at	0.00033057	0.0409596	-0.838688	5.05804
ENSG00000228459_at	0.000308707	0.039606	0.590917	6.39465
ENSG00000228952_at	0.000116325	0.0276977	0.602769	6.97622
ENSG00000229852_at	6.04e-05	0.0228557	0.548711	7.30396
ENSG00000230065_at	4.15e-06	0.00724273	-1.00934	5.44531
ENSG00000230753_at	0.000508368	0.0498728	0.514962	7.47518
ENSG00000233058_at	0.000108151	0.0274971	0.583931	7.41342
ENSG00000233589_at	0.000111946	0.0276977	-0.869848	4.58426
ENSG00000234161_at	0.000360396	0.0426732	-0.562029	4.34108
ENSG00000234181_at	7.06e-06	0.0102105	0.614588	7.2854
ENSG00000234323_at	0.000302756	0.0395058	-0.981025	6.85434
ENSG00000234380_at	4.77e-05	0.0207263	0.856747	7.2748
ENSG00000234614_at	0.000383152	0.0436014	0.684092	7.03672
ENSG00000236263_at	2.18e-05	0.0147116	0.750067	7.38567
ENSG00000237813_at	7.34e-05	0.0244599	0.515604	6.93583
ENSG00000241489_at	0.000238475	0.0356812	0.63911	6.57736
ENSG00000245662_at	0.000181019	0.0308705	-0.740835	7.70779
ENSG00000246339_at	0.000492306	0.0490311	0.504069	6.02064
ENSG00000248508_at	0.000226893	0.0346012	0.711266	5.55371
ENSG00000249279_at	0.000438372	0.0460436	-0.543801	6.3616
ENSG00000249992_at	2.4e-05	0.0155213	0.517736	10.4149
ENSG00000250220_at	0.00030548	0.0395503	0.517756	7.20033
ENSG00000250548_at	0.000150563	0.0284617	0.554471	7.16767
ENSG00000252503_at	0.000119795	0.0277365	-0.506612	5.78294
ENSG00000253105_at	8.13e-05	0.0247923	0.606419	4.07125
ENSG00000254526_at	0.000123489	0.0277807	-0.603096	7.83521
ENSG00000254951_at	5.29e-05	0.0226928	-1.36271	6.58762
ENSG00000255121_at	0.00013956	0.0284266	0.824793	8.85018
ENSG00000255322_at	4.17e-05	0.0203516	-0.736921	7.72212
ENSG00000255663_at	2.82e-05	0.0164685	-1.25103	6.89987
ENSG00000259624_at	0.000109257	0.027505	0.822414	5.05439
ENSG00000259817_at	0.000487038	0.0488888	0.644262	4.63535
ENSG00000260628_at	0.000429869	0.0454111	-0.538857	7.47573
ENSG00000263513_at	7.14e-05	0.0241057	-1.02093	8.4419
ENSG00000264940_at	4.52e-05	0.0207263	-0.978658	10.1817
ENSG00000265252_at	0.00026702	0.0373122	0.592684	7.20486
ENSG00000273143_at	0.000420072	0.0453623	0.545904	6.63754
ENSG00000273727_at	5.72e-08	0.000907503	-1.47307	6.74467
ENSG00000276410_at	0.000510191	0.0498728	-0.918465	8.00246
ENSG00000278705_at	7.02e-05	0.0241057	-0.775178	8.00227
ENSG00000280587_at	1.31e-07	0.00138465	1.17614	7.77742

## Sheet: Table S28.DExplore-GEO2R_all
Supplementary Table S28. List of all DEGs detected by both DExplore and GEO2R
Legend: probeID, the ID of the probe for GPL16686 ([HuGene-2_0-st] Affymetrix Human Gene 2.0 ST Array [transcript (gene) version]); gene symbol, the gene symbol from the NCBI's Gene database
probeID	gene.symbol
16989636	KIF20A
16817017	PLK1
16688386	DEPDC1
16939637	VIPR1
16697695	KIF14
16783047	G2E3
16829738	CTNS
17110367	MIR222
17126284	LINC01348
16697544	ASPM
17048538	CASD1
16777185	GJB2
17097211	PTGR1
16952782	TMEM158
16658589	LINC01714
16779444	VPS36
16903327	GTDC1
17053535	ASIC3
16698984	NEK2
16973753	LOC105374352
16818359	TGFB1I1
17016509	H3C12
16834931	FMNL1
16985599	CCNB1
16684194	TAF12
16859205	UCA1
16948063	NLGN1
16699634	TLR5
16717235	AVPI1
17111738	OPHN1
16978568	CENPE
16721835	WEE1
16684080	IFI6
16864275	CPT1C
17017290	GPANK1
16969911	ANK2
16775324	BORA
16793225	DLGAP5
16934671	TST
16914374	PCIF1
16974722	LCORL
17059828	TFPI2
16900931	TSGA10
16938527	RBMS3
16755692	GAS2L3
16761495	TAS2R10
16920548	AURKA
16922459	LINC01426
16959531	STAG1
16668079	GPSM2
16991741	PTTG1
16850216	SECTM1
17117682	MMP25-AS1
16761502	TAS2R14
16968765	HERC5
17109326	CLTRN
17023484	ARHGAP18
16774053	CCNA1
16842237	SNORD3C
16855600	CCBE1
16942270	PTPRG
17012859	PDE7B
16809093	GABPB1
16987008	RASA1
16761518	TAS2R31
16861997	ZFP36
16839757	SHPK
17070061	LY96
16889251	SGO2
16971943	ETFDH
17121496	ARHGAP23
16784215	GPR137C
16705661	COL13A1
16775014	CKAP2
16871359	DMKN
17085545	LOC100133920
17119888	ICMT-DT
17120246	LOC100288175
16830173	PIMREG
17005774	LINC00240
16778611	CCDC122
16745503	BLID
16790673	CDH24
17082132	NAPRT
16671653	SLC50A1
16839732	TRPV1
16919072	MROH8
16961003	TRIM59
16709405	PLEKHS1
16711881	BEND7
16707221	KIF20B
17122474	MIR4435-2HG
16810585	PIF1
16926942	USP18
16951990	SUSD5
16953121	SNORD13P3
16670574	ECM1
17016360	H4C2
16842812	TLCD1
16872926	PSG5
16798919	ARHGAP11A
16955645	FHIT
16667094	EPHX4
16854202	ABHD3
16662648	CDCA8
16945051	PLXNA1
16938973	APRG1
16701921	LOC105376367
16789899	TTC5
16979163	ARSJ
17010522	IRAK1BP1
17068064	LETM2
16723318	PRRG4
17059911	PON3
16723120	METTL15
16913681	FAM83D
17098027	STOM
16825602	DOC2A
16874012	CA11
16793661	LINC01303
16716371	CH25H
16803642	MINAR1
16967684	ANKRD17-DT
17100810	LOC100507412
16786264	ACOT4
16997676	MTRNR2L2
16949780	ATP13A3-DT
16757493	SDSL

## Sheet: Table S29.DExplore-GEO2R_down
Supplementary Table S29. List of downregulated DEGs detected by both DExplore and GEO2R
Legend: probeID, the ID of the probe for GPL16686 ([HuGene-2_0-st] Affymetrix Human Gene 2.0 ST Array [transcript (gene) version]); gene symbol, the gene symbol from the NCBI's Gene database
probeID	gene.symbol
16989636	KIF20A
16817017	PLK1
16688386	DEPDC1
16939637	VIPR1
16697695	KIF14
16783047	G2E3
16829738	CTNS
17110367	MIR222
16697544	ASPM
16777185	GJB2
16779444	VPS36
16903327	GTDC1
16698984	NEK2
16973753	LOC105374352
16818359	TGFB1I1
17016509	H3C12
16834931	FMNL1
16985599	CCNB1
16948063	NLGN1
17111738	OPHN1
16978568	CENPE
16721835	WEE1
16969911	ANK2
16775324	BORA
16793225	DLGAP5
16914374	PCIF1
16974722	LCORL
16938527	RBMS3
16755692	GAS2L3
16761495	TAS2R10
16920548	AURKA
16959531	STAG1
16668079	GPSM2
16991741	PTTG1
16761502	TAS2R14
17023484	ARHGAP18
16774053	CCNA1
16842237	SNORD3C
16855600	CCBE1
16942270	PTPRG
17012859	PDE7B
16809093	GABPB1
16987008	RASA1
16761518	TAS2R31
16889251	SGO2
17121496	ARHGAP23
16705661	COL13A1
16775014	CKAP2
16830173	PIMREG
16745503	BLID
17082132	NAPRT
16961003	TRIM59
16709405	PLEKHS1
16711881	BEND7
16707221	KIF20B
17122474	MIR4435-2HG
16810585	PIF1
16951990	SUSD5
17016360	H4C2
16798919	ARHGAP11A
16955645	FHIT
16667094	EPHX4
16662648	CDCA8
16945051	PLXNA1
16938973	APRG1
16789899	TTC5
16979163	ARSJ
17010522	IRAK1BP1
16723120	METTL15
16913681	FAM83D
16803642	MINAR1
17100810	LOC100507412

## Sheet: Table S30.DExplore-GEO2R_up
Supplementary Table S30. List of upregulated DEGs detected by both DExplore and GEO2R
Legend: probeID, the ID of the probe for GPL16686 ([HuGene-2_0-st] Affymetrix Human Gene 2.0 ST Array [transcript (gene) version]); gene symbol, the gene symbol from the NCBI's Gene database
probeID	gene.symbol
17126284	LINC01348
17048538	CASD1
17097211	PTGR1
16952782	TMEM158
16658589	LINC01714
17053535	ASIC3
16684194	TAF12
16859205	UCA1
16699634	TLR5
16717235	AVPI1
16684080	IFI6
16864275	CPT1C
17017290	GPANK1
16934671	TST
17059828	TFPI2
16900931	TSGA10
16922459	LINC01426
16850216	SECTM1
17117682	MMP25-AS1
16968765	HERC5
17109326	CLTRN
16861997	ZFP36
16839757	SHPK
17070061	LY96
16971943	ETFDH
16784215	GPR137C
16871359	DMKN
17085545	LOC100133920
17119888	ICMT-DT
17120246	LOC100288175
17005774	LINC00240
16778611	CCDC122
16790673	CDH24
16671653	SLC50A1
16839732	TRPV1
16919072	MROH8
16926942	USP18
16953121	SNORD13P3
16670574	ECM1
16842812	TLCD1
16872926	PSG5
16854202	ABHD3
16701921	LOC105376367
17068064	LETM2
16723318	PRRG4
17059911	PON3
17098027	STOM
16825602	DOC2A
16874012	CA11
16793661	LINC01303
16716371	CH25H
16967684	ANKRD17-DT
16786264	ACOT4
16997676	MTRNR2L2
16949780	ATP13A3-DT
16757493	SDSL

## Sheet: Table S31.DExplore-CARMAweb_all
Supplementary Table S31. List of all DEGs detected by both DExplore and CARMAweb
Legend: probeID, the ID of the probe for GPL16686 ([HuGene-2_0-st] Affymetrix Human Gene 2.0 ST Array [transcript (gene) version]); gene symbol, the gene symbol from the NCBI's Gene database
probeID	gene.symbol
16989636	KIF20A
16817017	PLK1
16688386	DEPDC1
16939637	VIPR1
16697695	KIF14
16783047	G2E3
16829738	CTNS
17126284	LINC01348
16697544	ASPM
17048538	CASD1
16777185	GJB2
17097211	PTGR1
16952782	TMEM158
16658589	LINC01714
16779444	VPS36
16903327	GTDC1
17053535	ASIC3
16698984	NEK2
16818359	TGFB1I1
17016509	H3C12
16834931	FMNL1
16985599	CCNB1
16684194	TAF12
16859205	UCA1
16948063	NLGN1
16699634	TLR5
16717235	AVPI1
16978568	CENPE
16721835	WEE1
16684080	IFI6
16864275	CPT1C
16775324	BORA
16793225	DLGAP5
16934671	TST
16974722	LCORL
17059828	TFPI2
16900931	TSGA10
16938527	RBMS3
16755692	GAS2L3
16920548	AURKA
16922459	LINC01426
16959531	STAG1
16668079	GPSM2
16991741	PTTG1
16850216	SECTM1
16968765	HERC5
17109326	CLTRN
17023484	ARHGAP18
16774053	CCNA1
16842237	SNORD3C
16855600	CCBE1
16942270	PTPRG
17012859	PDE7B
16987008	RASA1
16861997	ZFP36
17070061	LY96
16889251	SGO2
16784215	GPR137C
16705661	COL13A1
16775014	CKAP2
16871359	DMKN
17119888	ICMT-DT
16736891	KIF18A
17016369	H2BC3
17005774	LINC00240
16778611	CCDC122
16790673	CDH24
16671653	SLC50A1
16919072	MROH8
16709405	PLEKHS1
16711881	BEND7
16707221	KIF20B
17122474	MIR4435-2HG
16810585	PIF1
16926942	USP18
16968331	FGF5
16951990	SUSD5
16670574	ECM1
17016360	H4C2
16842812	TLCD1
16872926	PSG5
16763577	SLC38A4
16955645	FHIT
16667094	EPHX4
16854202	ABHD3
16662648	CDCA8
16945051	PLXNA1
16938973	APRG1
16789899	TTC5
16979163	ARSJ
17010522	IRAK1BP1
16952280	SCN5A
17068064	LETM2
16723318	PRRG4
16918996	SOGA1
17059911	PON3
16913681	FAM83D
17098027	STOM
16825602	DOC2A
16874012	CA11
16984905	IL31RA
16991859	HMMR
16793661	LINC01303
16967631	SLC4A4
16716371	CH25H
16837191	PITPNC1
16707567	FFAR4
16803642	MINAR1
16967684	ANKRD17-DT
16725041	FAM111B
17016486	H2BC13
16949780	ATP13A3-DT
16757493	SDSL
16908832	MIR3132

## Sheet: Table S32.DExplore-CARMA_down
Supplementary Table S32. List of downregulated DEGs detected by both DExplore and CARMAweb
Legend: probeID, the ID of the probe for GPL16686 ([HuGene-2_0-st] Affymetrix Human Gene 2.0 ST Array [transcript (gene) version]); gene symbol, the gene symbol from the NCBI's Gene database
probeID	gene.symbol
16989636	KIF20A
16817017	PLK1
16688386	DEPDC1
16939637	VIPR1
16697695	KIF14
16783047	G2E3
16829738	CTNS
16697544	ASPM
16777185	GJB2
16779444	VPS36
16903327	GTDC1
16698984	NEK2
16818359	TGFB1I1
17016509	H3C12
16834931	FMNL1
16985599	CCNB1
16948063	NLGN1
16978568	CENPE
16721835	WEE1
16775324	BORA
16793225	DLGAP5
16974722	LCORL
16938527	RBMS3
16755692	GAS2L3
16920548	AURKA
16959531	STAG1
16668079	GPSM2
16991741	PTTG1
17023484	ARHGAP18
16774053	CCNA1
16842237	SNORD3C
16855600	CCBE1
16942270	PTPRG
17012859	PDE7B
16987008	RASA1
16889251	SGO2
16705661	COL13A1
16775014	CKAP2
16736891	KIF18A
17016369	H2BC3
16709405	PLEKHS1
16711881	BEND7
16707221	KIF20B
17122474	MIR4435-2HG
16810585	PIF1
16968331	FGF5
16951990	SUSD5
17016360	H4C2
16763577	SLC38A4
16955645	FHIT
16667094	EPHX4
16662648	CDCA8
16945051	PLXNA1
16938973	APRG1
16789899	TTC5
16979163	ARSJ
17010522	IRAK1BP1
16952280	SCN5A
16918996	SOGA1
16913681	FAM83D
16984905	IL31RA
16991859	HMMR
16967631	SLC4A4
16837191	PITPNC1
16707567	FFAR4
16803642	MINAR1
17016486	H2BC13

## Sheet: Table S33.DExplore-CARMA_up
Supplementary Table S33. List of upregulated DEGs detected by both DExplore and CARMAweb
Legend: probeID, the ID of the probe for GPL16686 ([HuGene-2_0-st] Affymetrix Human Gene 2.0 ST Array [transcript (gene) version]); gene symbol, the gene symbol from the NCBI's Gene database
probeID	gene.symbol
17126284	LINC01348
17048538	CASD1
17097211	PTGR1
16952782	TMEM158
16658589	LINC01714
17053535	ASIC3
16684194	TAF12
16859205	UCA1
16699634	TLR5
16717235	AVPI1
16684080	IFI6
16864275	CPT1C
16934671	TST
17059828	TFPI2
16900931	TSGA10
16922459	LINC01426
16850216	SECTM1
16968765	HERC5
17109326	CLTRN
16861997	ZFP36
17070061	LY96
16784215	GPR137C
16871359	DMKN
17119888	ICMT-DT
17005774	LINC00240
16778611	CCDC122
16790673	CDH24
16671653	SLC50A1
16919072	MROH8
16926942	USP18
16670574	ECM1
16842812	TLCD1
16872926	PSG5
16854202	ABHD3
17068064	LETM2
16723318	PRRG4
17059911	PON3
17098027	STOM
16825602	DOC2A
16874012	CA11
16793661	LINC01303
16716371	CH25H
16967684	ANKRD17-DT
16725041	FAM111B
16949780	ATP13A3-DT
16757493	SDSL
16908832	MIR3132
