# Supplementary material for: DExplore: An Online Tool for Detecting Differentially Expressed Genes from mRNA Microarray Experiments
Source: Biology (Basel). 2024 May 16;13(5):351. doi: 10.3390/biology13050351 (PMC11117493; doi:10.3390/biology13050351)
Supplement: Supplementary file 1 [file biology-13-00351-s001.zip › Tables S34-S47_GO_terms_GSE113427.xlsx]

## Sheet: Table S34.DExplore_WG_all
Supplementary Table S34. List of GO terms identified by WebGestalt’s ORA using all DEGs detected by DExplore - GSE113427
geneSet	description	link	size	overlap	expect	enrichmentRatio	pValue	FDR	overlapId	database	userId
GO:0140014	mitotic nuclear division	http://amigo.geneontology.org/amigo/term/GO:0140014	272	22	2.72173	8.08309	4.17e-14	3.38e-10	699;891;899;991;995;1062;4751;5347;6790;8900;9232;9585;9787;9928;10274;11065;27338;55143;79075;79866;81930;84722	geneontology_Biological_Process	16817017;16697695;16698984;16985599;16978568;16775324;16793225;16920548;16959531;16991741;16774053;16736891;16914315;16707221;16662648;16815090;16663514;17000439;16690535;17080595;16901755;16875763
GO:0000280	nuclear division	http://amigo.geneontology.org/amigo/term/GO:0000280	408	24	4.0826	5.87861	2.83e-12	1.15e-08	699;891;899;991;995;1062;4751;5347;6790;8900;9232;9585;9787;9928;10274;11065;27338;55143;79075;79866;81930;84722;151246;259266	geneontology_Biological_Process	16817017;16697695;16697544;16698984;16985599;16978568;16775324;16793225;16920548;16959531;16991741;16774053;16889251;16736891;16914315;16707221;16662648;16815090;16663514;17000439;16690535;17080595;16901755;16875763
GO:0007088	regulation of mitotic nuclear division	http://amigo.geneontology.org/amigo/term/GO:0007088	171	16	1.71109	9.35078	1.62e-11	3.4e-08	699;891;899;991;995;1062;4751;5347;6790;8900;9232;9585;9787;10274;11065;79866	geneontology_Biological_Process	16817017;16698984;16985599;16978568;16775324;16793225;16920548;16959531;16991741;16774053;16914315;16707221;16815090;16663514;17000439;16901755
GO:0048285	organelle fission	http://amigo.geneontology.org/amigo/term/GO:0048285	444	24	4.44282	5.40197	1.68e-11	3.4e-08	699;891;899;991;995;1062;4751;5347;6790;8900;9232;9585;9787;9928;10274;11065;27338;55143;79075;79866;81930;84722;151246;259266	geneontology_Biological_Process	16817017;16697695;16697544;16698984;16985599;16978568;16775324;16793225;16920548;16959531;16991741;16774053;16889251;16736891;16914315;16707221;16662648;16815090;16663514;17000439;16690535;17080595;16901755;16875763
GO:0051783	regulation of nuclear division	http://amigo.geneontology.org/amigo/term/GO:0051783	195	16	1.95124	8.19991	1.18e-10	1.91e-07	699;891;899;991;995;1062;4751;5347;6790;8900;9232;9585;9787;10274;11065;79866	geneontology_Biological_Process	16817017;16698984;16985599;16978568;16775324;16793225;16920548;16959531;16991741;16774053;16914315;16707221;16815090;16663514;17000439;16901755
GO:0000922	spindle pole	http://amigo.geneontology.org/amigo/term/GO:0000922	142	14	1.4209	9.85289	1.57e-10	2.11e-07	891;991;4751;5347;6790;9585;9787;9793;10274;26586;29899;81610;84722;259266	geneontology_Cellular_Component	16817017;16697544;16698984;16985599;16793225;16920548;16959531;16668079;16775014;16707221;16913681;16663514;16690535;16737841
GO:0005819	spindle	http://amigo.geneontology.org/amigo/term/GO:0005819	313	19	3.13199	6.06643	3.64e-10	4.2e-07	891;991;1062;4751;5347;6790;9585;9787;9793;9928;10112;10274;26586;29899;55143;81610;81930;84722;259266	geneontology_Cellular_Component	16989636;16817017;16697695;16697544;16698984;16985599;16978568;16793225;16920548;16959531;16668079;16775014;16736891;16707221;16662648;16913681;16663514;16690535;16737841
GO:0000819	sister chromatid segregation	http://amigo.geneontology.org/amigo/term/GO:0000819	175	14	1.75111	7.99491	2.5e-09	2.53e-06	699;891;991;1062;4751;5347;9232;9787;9928;55143;79075;81930;84722;151246	geneontology_Biological_Process	16817017;16697695;16698984;16985599;16978568;16793225;16991741;16889251;16736891;16662648;16663514;16690535;17080595;16901755
GO:0000070	mitotic sister chromatid segregation	http://amigo.geneontology.org/amigo/term/GO:0000070	148	13	1.48094	8.7782	3.03e-09	2.72e-06	699;891;991;1062;4751;5347;9232;9787;9928;55143;79075;81930;84722	geneontology_Biological_Process	16817017;16697695;16698984;16985599;16978568;16793225;16991741;16736891;16662648;16663514;16690535;17080595;16901755
GO:1902850	microtubule cytoskeleton organization involved in mitosis	http://amigo.geneontology.org/amigo/term/GO:1902850	127	12	1.27081	9.44281	5.45e-09	4.41e-06	891;991;1058;1062;4751;5347;6790;10252;10274;29899;79866;84722	geneontology_Biological_Process	16817017;16698984;16985599;16978568;16775324;16920548;16959531;16668079;16663514;16877956;16690535;16970435
GO:0098813	nuclear chromosome segregation	http://amigo.geneontology.org/amigo/term/GO:0098813	247	15	2.47157	6.06901	2.83e-08	2.06e-05	699;891;991;1062;4751;5347;9232;9787;9928;55143;79075;81610;81930;84722;151246	geneontology_Biological_Process	16817017;16697695;16698984;16985599;16978568;16793225;16991741;16889251;16736891;16662648;16913681;16663514;16690535;17080595;16901755
GO:0051233	spindle midzone	http://amigo.geneontology.org/amigo/term/GO:0051233	33	7	0.33021	21.1986	3.05e-08	2.06e-05	1062;5347;6790;9585;9928;55143;81930	geneontology_Cellular_Component	16817017;16697695;16978568;16920548;16736891;16707221;16662648
GO:0000775	chromosome, centromeric region	http://amigo.geneontology.org/amigo/term/GO:0000775	187	13	1.87119	6.94745	5.08e-08	3.16e-05	699;891;1058;1062;4751;5347;6790;9793;10274;55143;79075;81930;151246	geneontology_Cellular_Component	16817017;16698984;16985599;16978568;16920548;16959531;16889251;16736891;16662648;16877956;17080595;16901755;16737841
GO:0031145	anaphase-promoting complex-dependent catabolic process	http://amigo.geneontology.org/amigo/term/GO:0031145	36	7	0.360229	19.4321	5.81e-08	3.33e-05	891;991;5347;6790;9232;11065;27338	geneontology_Biological_Process	16817017;16985599;16920548;16991741;16914315;16663514;16875763
GO:0007059	chromosome segregation	http://amigo.geneontology.org/amigo/term/GO:0007059	301	16	3.01192	5.31223	6.17e-08	3.33e-05	699;891;991;1062;4751;5347;9232;9787;9928;10274;55143;79075;81610;81930;84722;151246	geneontology_Biological_Process	16817017;16697695;16698984;16985599;16978568;16793225;16959531;16991741;16889251;16736891;16662648;16913681;16663514;16690535;17080595;16901755
GO:0007052	mitotic spindle organization	http://amigo.geneontology.org/amigo/term/GO:0007052	106	10	1.06067	9.42796	1.08e-07	5.46e-05	891;991;1062;4751;5347;6790;10274;29899;79866;84722	geneontology_Biological_Process	16817017;16698984;16985599;16978568;16775324;16920548;16959531;16668079;16663514;16690535
GO:0007051	spindle organization	http://amigo.geneontology.org/amigo/term/GO:0007051	169	12	1.69108	7.09608	1.34e-07	6.38e-05	891;991;1062;4751;5347;6790;9793;10274;29899;79866;84722;259266	geneontology_Biological_Process	16817017;16697544;16698984;16985599;16978568;16775324;16920548;16959531;16668079;16663514;16690535;16737841
GO:0097431	mitotic spindle pole	http://amigo.geneontology.org/amigo/term/GO:0097431	26	6	0.260165	23.0622	1.79e-07	8.06e-05	6790;9585;10274;29899;81610;259266	geneontology_Cellular_Component	16697544;16920548;16959531;16668079;16707221;16913681
GO:0044772	mitotic cell cycle phase transition	http://amigo.geneontology.org/amigo/term/GO:0044772	464	19	4.64295	4.09222	2.11e-07	9e-05	699;891;991;995;1062;3161;4751;5347;5557;6790;7465;8900;9787;9793;9928;11065;23649;27338;79866	geneontology_Biological_Process	16817017;16697695;16698984;16985599;16978568;16721835;16775324;16793225;16920548;16774053;16914315;16991859;16663514;16726790;17000439;16901755;16737841;16766318;16875763
GO:0051303	establishment of chromosome localization	http://amigo.geneontology.org/amigo/term/GO:0051303	72	8	0.720458	11.104	5.93e-07	0.00024	891;1062;9787;9928;55143;81610;81930;84722	geneontology_Biological_Process	16697695;16985599;16978568;16793225;16736891;16662648;16913681;16690535
GO:0050000	chromosome localization	http://amigo.geneontology.org/amigo/term/GO:0050000	73	8	0.730464	10.9519	6.61e-07	0.000254	891;1062;9787;9928;55143;81610;81930;84722	geneontology_Biological_Process	16697695;16985599;16978568;16793225;16736891;16662648;16913681;16690535
GO:0098687	chromosomal region	http://amigo.geneontology.org/amigo/term/GO:0098687	321	15	3.21204	4.66993	8.41e-07	0.000309	699;891;1058;1062;3018;4751;5347;6790;9793;10274;55143;79075;80119;81930;151246	geneontology_Cellular_Component	16817017;16698984;16985599;16978568;16920548;16959531;16889251;16736891;17016369;16810585;16662648;16877956;17080595;16901755;16737841
GO:0010965	regulation of mitotic sister chromatid separation	http://amigo.geneontology.org/amigo/term/GO:0010965	55	7	0.55035	12.7192	1.2e-06	0.000406	699;891;991;1062;5347;9232;9787	geneontology_Biological_Process	16817017;16985599;16978568;16793225;16991741;16663514;16901755
GO:0051310	metaphase plate congression	http://amigo.geneontology.org/amigo/term/GO:0051310	55	7	0.55035	12.7192	1.2e-06	0.000406	891;1062;9928;55143;81610;81930;84722	geneontology_Biological_Process	16697695;16985599;16978568;16736891;16662648;16913681;16690535
GO:0051306	mitotic sister chromatid separation	http://amigo.geneontology.org/amigo/term/GO:0051306	58	7	0.580369	12.0613	1.74e-06	0.000563	699;891;991;1062;5347;9232;9787	geneontology_Biological_Process	16817017;16985599;16978568;16793225;16991741;16663514;16901755
GO:0000779	condensed chromosome, centromeric region	http://amigo.geneontology.org/amigo/term/GO:0000779	113	9	1.13072	7.95954	2e-06	0.000622	699;891;1058;1062;4751;5347;6790;9793;151246	geneontology_Cellular_Component	16817017;16698984;16985599;16978568;16920548;16889251;16877956;16901755;16737841
GO:1905818	regulation of chromosome separation	http://amigo.geneontology.org/amigo/term/GO:1905818	60	7	0.600382	11.6592	2.2e-06	0.000658	699;891;991;1062;5347;9232;9787	geneontology_Biological_Process	16817017;16985599;16978568;16793225;16991741;16663514;16901755
GO:0000079	regulation of cyclin-dependent protein serine/threonine kinase activity	http://amigo.geneontology.org/amigo/term/GO:0000079	86	8	0.860547	9.29641	2.34e-06	0.000674	891;899;995;5347;7128;8900;51191;84722	geneontology_Biological_Process	16817017;16985599;16968765;16774053;16815090;17000439;16690535;17012946
GO:0000780	condensed nuclear chromosome, centromeric region	http://amigo.geneontology.org/amigo/term/GO:0000780	23	5	0.230146	21.7253	2.75e-06	0.000768	699;891;1058;5347;6790	geneontology_Cellular_Component	16817017;16985599;16920548;16877956;16901755
GO:1904668	positive regulation of ubiquitin protein ligase activity	http://amigo.geneontology.org/amigo/term/GO:1904668	11	4	0.11007	36.3405	3.03e-06	0.000815	991;5347;11065;27338	geneontology_Biological_Process	16817017;16914315;16663514;16875763
GO:1904029	regulation of cyclin-dependent protein kinase activity	http://amigo.geneontology.org/amigo/term/GO:1904029	90	8	0.900573	8.88324	3.3e-06	0.00086	891;899;995;5347;7128;8900;51191;84722	geneontology_Biological_Process	16817017;16985599;16968765;16774053;16815090;17000439;16690535;17012946
GO:0072686	mitotic spindle	http://amigo.geneontology.org/amigo/term/GO:0072686	92	8	0.920585	8.69012	3.89e-06	0.000982	1062;6790;9585;10274;29899;81610;81930;259266	geneontology_Cellular_Component	16697544;16978568;16920548;16959531;16668079;16736891;16707221;16913681
GO:0007080	mitotic metaphase plate congression	http://amigo.geneontology.org/amigo/term/GO:0007080	43	6	0.430274	13.9446	4.13e-06	0.000982	891;1062;9928;55143;81930;84722	geneontology_Biological_Process	16697695;16985599;16978568;16736891;16662648;16690535
GO:0033047	regulation of mitotic sister chromatid segregation	http://amigo.geneontology.org/amigo/term/GO:0033047	66	7	0.66042	10.5993	4.21e-06	0.000982	699;891;991;1062;5347;9232;9787	geneontology_Biological_Process	16817017;16985599;16978568;16793225;16991741;16663514;16901755
GO:1901987	regulation of cell cycle phase transition	http://amigo.geneontology.org/amigo/term/GO:1901987	366	15	3.66233	4.09575	4.25e-06	0.000982	699;891;991;995;1062;3161;4751;5347;6790;7465;9787;9793;9928;11065;81610	geneontology_Biological_Process	16817017;16697695;16698984;16985599;16978568;16721835;16793225;16920548;16914315;16913681;16991859;16663514;17000439;16901755;16737841
GO:0000776	kinetochore	http://amigo.geneontology.org/amigo/term/GO:0000776	127	9	1.27081	7.08211	5.27e-06	0.00117172	699;891;1058;1062;4751;5347;9793;81930;151246	geneontology_Cellular_Component	16817017;16698984;16985599;16978568;16889251;16736891;16877956;16901755;16737841
GO:0051983	regulation of chromosome segregation	http://amigo.geneontology.org/amigo/term/GO:0051983	96	8	0.960611	8.32803	5.36e-06	0.00117172	699;891;991;1062;4751;5347;9232;9787	geneontology_Biological_Process	16817017;16698984;16985599;16978568;16793225;16991741;16663514;16901755
GO:0030496	midbody	http://amigo.geneontology.org/amigo/term/GO:0030496	164	10	1.64104	6.09368	6.04e-06	0.00128527	1062;4751;5347;6790;9585;9928;10112;55143;84722;259266	geneontology_Cellular_Component	16989636;16817017;16697695;16697544;16698984;16978568;16920548;16707221;16662648;16690535
GO:0070507	regulation of microtubule cytoskeleton organization	http://amigo.geneontology.org/amigo/term/GO:0070507	165	10	1.65105	6.05675	6.37e-06	0.00132173	899;4751;5347;6790;10274;26586;29899;79866;81930;84722	geneontology_Biological_Process	16817017;16698984;16775324;16920548;16959531;16668079;16775014;16736891;16815090;16690535
GO:0000777	condensed chromosome kinetochore	http://amigo.geneontology.org/amigo/term/GO:0000777	100	8	1.00064	7.99491	7.27e-06	0.00146934	699;891;1058;1062;4751;5347;9793;151246	geneontology_Cellular_Component	16817017;16698984;16985599;16978568;16889251;16877956;16901755;16737841
GO:1901990	regulation of mitotic cell cycle phase transition	http://amigo.geneontology.org/amigo/term/GO:1901990	336	14	3.36214	4.16402	7.45e-06	0.00146934	699;891;991;995;1062;3161;4751;5347;6790;7465;9787;9793;9928;11065	geneontology_Biological_Process	16817017;16697695;16698984;16985599;16978568;16721835;16793225;16920548;16914315;16991859;16663514;17000439;16901755;16737841
GO:0000778	condensed nuclear chromosome kinetochore	http://amigo.geneontology.org/amigo/term/GO:0000778	14	4	0.140089	28.5533	8.96e-06	0.00172585	699;891;1058;5347	geneontology_Cellular_Component	16817017;16985599;16877956;16901755
GO:0033045	regulation of sister chromatid segregation	http://amigo.geneontology.org/amigo/term/GO:0033045	75	7	0.750477	9.3274	9.96e-06	0.00186623	699;891;991;1062;5347;9232;9787	geneontology_Biological_Process	16817017;16985599;16978568;16793225;16991741;16663514;16901755
GO:0030071	regulation of mitotic metaphase/anaphase transition	http://amigo.geneontology.org/amigo/term/GO:0030071	50	6	0.500318	11.9924	1.02e-05	0.00186623	699;891;991;1062;5347;9787	geneontology_Biological_Process	16817017;16985599;16978568;16793225;16663514;16901755
GO:1902099	regulation of metaphase/anaphase transition of cell cycle	http://amigo.geneontology.org/amigo/term/GO:1902099	52	6	0.520331	11.5311	1.28e-05	0.00228673	699;891;991;1062;5347;9787	geneontology_Biological_Process	16817017;16985599;16978568;16793225;16663514;16901755
GO:0045787	positive regulation of cell cycle	http://amigo.geneontology.org/amigo/term/GO:0045787	353	14	3.53225	3.96348	1.3e-05	0.00228673	440;891;899;995;1490;6790;8900;9585;9787;9928;11065;29899;81610;84722	geneontology_Biological_Process	16697695;16985599;16793225;16920548;16668079;16774053;16914315;16707221;16815090;17125034;16913681;17023646;17000439;16690535
GO:0007091	metaphase/anaphase transition of mitotic cell cycle	http://amigo.geneontology.org/amigo/term/GO:0007091	53	6	0.530337	11.3136	1.43e-05	0.00246223	699;891;991;1062;5347;9787	geneontology_Biological_Process	16817017;16985599;16978568;16793225;16663514;16901755
GO:0000086	G2/M transition of mitotic cell cycle	http://amigo.geneontology.org/amigo/term/GO:0000086	182	10	1.82116	5.49101	1.51e-05	0.00254114	891;995;3161;4751;5347;6790;7465;9793;9928;79866	geneontology_Biological_Process	16817017;16697695;16698984;16985599;16721835;16775324;16920548;16991859;17000439;16737841
GO:1903046	meiotic cell cycle process	http://amigo.geneontology.org/amigo/term/GO:1903046	184	10	1.84117	5.43133	1.66e-05	0.00273719	699;991;995;5347;6790;8900;9232;81930;151246;259266	geneontology_Biological_Process	16817017;16697544;16920548;16991741;16774053;16889251;16736891;16663514;17000439;16901755
GO:0044784	metaphase/anaphase transition of cell cycle	http://amigo.geneontology.org/amigo/term/GO:0044784	55	6	0.55035	10.9022	1.78e-05	0.00287473	699;891;991;1062;5347;9787	geneontology_Biological_Process	16817017;16985599;16978568;16793225;16663514;16901755
GO:0060236	regulation of mitotic spindle organization	http://amigo.geneontology.org/amigo/term/GO:0060236	35	5	0.350223	14.2766	2.41e-05	0.00382159	5347;10274;29899;79866;84722	geneontology_Biological_Process	16817017;16775324;16959531;16668079;16690535
GO:0032886	regulation of microtubule-based process	http://amigo.geneontology.org/amigo/term/GO:0032886	193	10	1.93123	5.17805	2.5e-05	0.00389519	899;4751;5347;6790;10274;26586;29899;79866;81930;84722	geneontology_Biological_Process	16817017;16698984;16775324;16920548;16959531;16668079;16775014;16736891;16815090;16690535
GO:0051304	chromosome separation	http://amigo.geneontology.org/amigo/term/GO:0051304	88	7	0.88056	7.94949	2.86e-05	0.00435912	699;891;991;1062;5347;9232;9787	geneontology_Biological_Process	16817017;16985599;16978568;16793225;16991741;16663514;16901755
GO:0044839	cell cycle G2/M phase transition	http://amigo.geneontology.org/amigo/term/GO:0044839	200	10	2.00127	4.99682	3.4e-05	0.00508732	891;995;3161;4751;5347;6790;7465;9793;9928;79866	geneontology_Biological_Process	16817017;16697695;16698984;16985599;16721835;16775324;16920548;16991859;17000439;16737841
GO:2000816	negative regulation of mitotic sister chromatid separation	http://amigo.geneontology.org/amigo/term/GO:2000816	38	5	0.380242	13.1495	3.64e-05	0.00534786	699;891;991;5347;9232	geneontology_Biological_Process	16817017;16985599;16991741;16663514;16901755
GO:0051321	meiotic cell cycle	http://amigo.geneontology.org/amigo/term/GO:0051321	246	11	2.46157	4.4687	3.84e-05	0.0055487	699;991;995;4751;5347;6790;8900;9232;81930;151246;259266	geneontology_Biological_Process	16817017;16697544;16698984;16920548;16991741;16774053;16889251;16736891;16663514;17000439;16901755
GO:1905819	negative regulation of chromosome separation	http://amigo.geneontology.org/amigo/term/GO:1905819	39	5	0.390248	12.8124	4.14e-05	0.00567376	699;891;991;5347;9232	geneontology_Biological_Process	16817017;16985599;16991741;16663514;16901755
GO:0090224	regulation of spindle organization	http://amigo.geneontology.org/amigo/term/GO:0090224	39	5	0.390248	12.8124	4.14e-05	0.00567376	5347;10274;29899;79866;84722	geneontology_Biological_Process	16817017;16775324;16959531;16668079;16690535
GO:1904666	regulation of ubiquitin protein ligase activity	http://amigo.geneontology.org/amigo/term/GO:1904666	20	4	0.200127	19.9873	4.14e-05	0.00567376	991;5347;11065;27338	geneontology_Biological_Process	16817017;16914315;16663514;16875763
GO:0140013	meiotic nuclear division	http://amigo.geneontology.org/amigo/term/GO:0140013	167	9	1.67106	5.38579	4.72e-05	0.00636611	699;991;5347;6790;8900;9232;81930;151246;259266	geneontology_Biological_Process	16817017;16697544;16920548;16991741;16774053;16889251;16736891;16663514;16901755
GO:0033048	negative regulation of mitotic sister chromatid segregation	http://amigo.geneontology.org/amigo/term/GO:0033048	41	5	0.410261	12.1874	5.3e-05	0.00702659	699;891;991;5347;9232	geneontology_Biological_Process	16817017;16985599;16991741;16663514;16901755
GO:0000793	condensed chromosome	http://amigo.geneontology.org/amigo/term/GO:0000793	216	10	2.16137	4.62669	6.51e-05	0.00848608	699;891;1058;1062;4751;5347;6790;9793;10274;151246	geneontology_Cellular_Component	16817017;16698984;16985599;16978568;16920548;16959531;16889251;16877956;16901755;16737841
GO:0033046	negative regulation of sister chromatid segregation	http://amigo.geneontology.org/amigo/term/GO:0033046	43	5	0.430274	11.6205	6.7e-05	0.00859907	699;891;991;5347;9232	geneontology_Biological_Process	16817017;16985599;16991741;16663514;16901755
GO:0051985	negative regulation of chromosome segregation	http://amigo.geneontology.org/amigo/term/GO:0051985	44	5	0.44028	11.3564	7.5e-05	0.00947314	699;891;991;5347;9232	geneontology_Biological_Process	16817017;16985599;16991741;16663514;16901755
GO:0010389	regulation of G2/M transition of mitotic cell cycle	http://amigo.geneontology.org/amigo/term/GO:0010389	141	8	1.4109	5.67015	8.74e-05	0.0108795	891;995;3161;4751;5347;6790;9793;9928	geneontology_Biological_Process	16817017;16697695;16698984;16985599;16920548;16991859;17000439;16737841
GO:0071900	regulation of protein serine/threonine kinase activity	http://amigo.geneontology.org/amigo/term/GO:0071900	477	15	4.77303	3.14265	9.26e-05	0.011347	727;891;899;995;1846;5347;5795;6653;7128;8900;10178;10252;51191;60370;84722	geneontology_Biological_Process	16817017;16985599;16717235;16968765;16774053;16815090;17000439;17097955;16690535;16732584;16724633;17012946;16970435;17075973;17113928
GO:0008017	microtubule binding	http://amigo.geneontology.org/amigo/term/GO:0008017	229	10	2.29146	4.36404	0.000106	0.0127593	1062;5347;9585;9793;9928;10112;81610;81930;84722;283431	geneontology_Molecular_Function	16989636;16817017;16697695;16978568;16755692;16736891;16707221;16913681;16690535;16737841
GO:0051225	spindle assembly	http://amigo.geneontology.org/amigo/term/GO:0051225	110	7	1.1007	6.35959	0.000119	0.0141673	991;4751;5347;6790;10274;29899;259266	geneontology_Biological_Process	16817017;16697544;16698984;16920548;16959531;16668079;16663514
GO:0007062	sister chromatid cohesion	http://amigo.geneontology.org/amigo/term/GO:0007062	49	5	0.490312	10.1976	0.000126	0.0148182	699;991;5347;79075;151246	geneontology_Biological_Process	16817017;16889251;16663514;17080595;16901755
GO:0000281	mitotic cytokinesis	http://amigo.geneontology.org/amigo/term/GO:0000281	78	6	0.780496	7.68742	0.00013	0.0150487	1058;5347;5921;9585;10112;26586	geneontology_Biological_Process	16989636;16817017;16987008;16775014;16707221;16877956
GO:0000910	cytokinesis	http://amigo.geneontology.org/amigo/term/GO:0000910	150	8	1.50095	5.32994	0.000135	0.0153319	1058;5347;5921;6790;9585;9928;10112;26586	geneontology_Biological_Process	16989636;16817017;16697695;16920548;16987008;16775014;16707221;16877956
GO:0005874	microtubule	http://amigo.geneontology.org/amigo/term/GO:0005874	385	13	3.85245	3.37448	0.000137	0.0153873	1062;4751;5347;6790;9585;9793;9928;10112;26586;81930;84722;259266;283431	geneontology_Cellular_Component	16989636;16817017;16697695;16697544;16698984;16978568;16755692;16920548;16775014;16736891;16707221;16690535;16737841
GO:0000940	condensed chromosome outer kinetochore	http://amigo.geneontology.org/amigo/term/GO:0000940	11	3	0.11007	27.2554	0.000153	0.0165253	699;891;5347	geneontology_Cellular_Component	16817017;16985599;16901755
GO:0045839	negative regulation of mitotic nuclear division	http://amigo.geneontology.org/amigo/term/GO:0045839	51	5	0.510324	9.79769	0.000153	0.0165253	699;891;991;5347;9232	geneontology_Biological_Process	16817017;16985599;16991741;16663514;16901755
GO:0005876	spindle microtubule	http://amigo.geneontology.org/amigo/term/GO:0005876	51	5	0.510324	9.79769	0.000153	0.0165253	1062;5347;6790;81930;84722	geneontology_Cellular_Component	16817017;16978568;16920548;16736891;16690535
GO:0007163	establishment or maintenance of cell polarity	http://amigo.geneontology.org/amigo/term/GO:0007163	196	9	1.96125	4.58892	0.000161	0.0171477	1058;4983;7465;9585;9793;10252;29899;55612;57381	geneontology_Biological_Process	17111738;16721835;16668079;16707221;16917061;16877956;16785127;16737841;16970435
GO:0005871	kinesin complex	http://amigo.geneontology.org/amigo/term/GO:0005871	52	5	0.520331	9.60927	0.000168	0.0176655	1062;9585;9928;10112;81930	geneontology_Cellular_Component	16989636;16697695;16978568;16736891;16707221
GO:1902749	regulation of cell cycle G2/M phase transition	http://amigo.geneontology.org/amigo/term/GO:1902749	157	8	1.571	5.0923	0.000184	0.0191121	891;995;3161;4751;5347;6790;9793;9928	geneontology_Biological_Process	16817017;16697695;16698984;16985599;16920548;16991859;17000439;16737841
GO:0051443	positive regulation of ubiquitin-protein transferase activity	http://amigo.geneontology.org/amigo/term/GO:0051443	29	4	0.290185	13.7843	0.000189	0.0191208	991;5347;11065;27338	geneontology_Biological_Process	16817017;16914315;16663514;16875763
GO:0008527	taste receptor activity	http://amigo.geneontology.org/amigo/term/GO:0008527	29	4	0.290185	13.7843	0.000189	0.0191208	50839;50840;259290;338557	geneontology_Molecular_Function	16761495;16761502;16761518;16707567
GO:0090068	positive regulation of cell cycle process	http://amigo.geneontology.org/amigo/term/GO:0090068	252	10	2.5216	3.96573	0.00023	0.0229975	891;995;1490;6790;9585;9787;9928;11065;29899;81610	geneontology_Biological_Process	16697695;16985599;16793225;16920548;16668079;16914315;16707221;16913681;17023646;17000439
GO:1990023	mitotic spindle midzone	http://amigo.geneontology.org/amigo/term/GO:1990023	13	3	0.130083	23.0622	0.000262	0.0257982	1062;9585;81930	geneontology_Cellular_Component	16978568;16736891;16707221
GO:0051656	establishment of organelle localization	http://amigo.geneontology.org/amigo/term/GO:0051656	472	14	4.723	2.96422	0.00029	0.0282723	891;1058;1062;8448;9787;9928;10252;22871;29899;55143;81610;81930;84722;129880	geneontology_Biological_Process	16697695;16985599;16948063;16978568;16793225;16668079;16736891;16662648;16913681;16825602;16887259;16877956;16690535;16970435
GO:0051493	regulation of cytoskeleton organization	http://amigo.geneontology.org/amigo/term/GO:0051493	473	14	4.73301	2.95795	0.000296	0.0285402	899;1490;4751;5347;5921;6790;10178;10274;26586;29899;79866;81930;84722;93663	geneontology_Biological_Process	16817017;16698984;16775324;16920548;16959531;16668079;17023484;16987008;16775014;16736891;16815090;17023646;16690535;17113928
GO:0061640	cytoskeleton-dependent cytokinesis	http://amigo.geneontology.org/amigo/term/GO:0061640	91	6	0.910579	6.58921	0.000304	0.0287978	1058;5347;5921;9585;10112;26586	geneontology_Biological_Process	16989636;16817017;16987008;16775014;16707221;16877956
GO:0051784	negative regulation of nuclear division	http://amigo.geneontology.org/amigo/term/GO:0051784	59	5	0.590375	8.46919	0.000306	0.0287978	699;891;991;5347;9232	geneontology_Biological_Process	16817017;16985599;16991741;16663514;16901755
GO:0030010	establishment of cell polarity	http://amigo.geneontology.org/amigo/term/GO:0030010	129	7	1.29082	5.42291	0.000319	0.0296786	1058;4983;7465;9585;10252;29899;55612	geneontology_Biological_Process	17111738;16721835;16668079;16707221;16917061;16877956;16970435
GO:0005813	centrosome	http://amigo.geneontology.org/amigo/term/GO:0005813	481	14	4.81306	2.90875	0.000351	0.0308891	891;899;991;3161;4751;5347;6790;9585;9787;9793;26586;29899;129880;259266	geneontology_Cellular_Component	16817017;16697544;16698984;16985599;16793225;16920548;16668079;16775014;16707221;16815090;16991859;16663514;16887259;16737841
GO:0010948	negative regulation of cell cycle process	http://amigo.geneontology.org/amigo/term/GO:0010948	266	10	2.66169	3.75701	0.000354	0.0308891	699;891;899;991;995;4751;5347;6790;7465;9232	geneontology_Biological_Process	16817017;16698984;16985599;16721835;16920548;16991741;16815090;16663514;17000439;16901755
GO:0007094	mitotic spindle assembly checkpoint	http://amigo.geneontology.org/amigo/term/GO:0007094	34	4	0.340216	11.7572	0.000355	0.0308891	699;891;991;5347	geneontology_Biological_Process	16817017;16985599;16663514;16901755
GO:0031577	spindle checkpoint	http://amigo.geneontology.org/amigo/term/GO:0031577	34	4	0.340216	11.7572	0.000355	0.0308891	699;891;991;5347	geneontology_Biological_Process	16817017;16985599;16663514;16901755
GO:0071173	spindle assembly checkpoint	http://amigo.geneontology.org/amigo/term/GO:0071173	34	4	0.340216	11.7572	0.000355	0.0308891	699;891;991;5347	geneontology_Biological_Process	16817017;16985599;16663514;16901755
GO:0071174	mitotic spindle checkpoint	http://amigo.geneontology.org/amigo/term/GO:0071174	34	4	0.340216	11.7572	0.000355	0.0308891	699;891;991;5347	geneontology_Biological_Process	16817017;16985599;16663514;16901755
GO:0043161	proteasome-mediated ubiquitin-dependent protein catabolic process	http://amigo.geneontology.org/amigo/term/GO:0043161	372	12	3.72237	3.22376	0.000376	0.0323194	891;899;991;2272;3429;5347;6790;9232;9928;11065;27338;285671	geneontology_Biological_Process	16817017;16697695;16985599;16920548;16991741;16914315;16955645;16985217;16815090;16663514;16787814;16875763
GO:0010498	proteasomal protein catabolic process	http://amigo.geneontology.org/amigo/term/GO:0010498	430	13	4.30274	3.02133	0.000399612	0.0340175	891;899;991;2272;3429;4983;5347;6790;9232;9928;11065;27338;285671	geneontology_Biological_Process	16817017;16697695;16985599;17111738;16920548;16991741;16914315;16955645;16985217;16815090;16663514;16787814;16875763
GO:0050909	sensory perception of taste	http://amigo.geneontology.org/amigo/term/GO:0050909	63	5	0.630401	7.93146	0.000416	0.035073	9311;50839;50840;259290;338557	geneontology_Biological_Process	17053535;16761495;16761502;16761518;16707567
GO:0045841	negative regulation of mitotic metaphase/anaphase transition	http://amigo.geneontology.org/amigo/term/GO:0045841	36	4	0.360229	11.104	0.000444	0.0370352	699;891;991;5347	geneontology_Biological_Process	16817017;16985599;16663514;16901755
GO:0045931	positive regulation of mitotic cell cycle	http://amigo.geneontology.org/amigo/term/GO:0045931	137	7	1.37087	5.10624	0.00046	0.037928	440;891;995;6790;9585;9787;11065	geneontology_Biological_Process	16985599;16793225;16920548;16914315;16707221;17125034;17000439
GO:0000794	condensed nuclear chromosome	http://amigo.geneontology.org/amigo/term/GO:0000794	99	6	0.99063	6.05675	0.000478	0.0385533	699;891;1058;4751;5347;6790	geneontology_Cellular_Component	16817017;16698984;16985599;16920548;16877956;16901755
GO:0000786	nucleosome	http://amigo.geneontology.org/amigo/term/GO:0000786	65	5	0.650414	7.68742	0.000481	0.0385533	1058;3018;8329;8340;8342	geneontology_Cellular_Component	17016369;17016486;16877956;17005858;17005865
GO:0031396	regulation of protein ubiquitination	http://amigo.geneontology.org/amigo/term/GO:0031396	181	8	1.81115	4.41708	0.000481	0.0385533	991;5347;7128;11065;23251;27338;55215;285671	geneontology_Biological_Process	16817017;16914315;16985217;16663514;16803642;16804559;17012946;16875763
GO:1902100	negative regulation of metaphase/anaphase transition of cell cycle	http://amigo.geneontology.org/amigo/term/GO:1902100	37	4	0.370235	10.8039	0.000494	0.0391828	699;891;991;5347	geneontology_Biological_Process	16817017;16985599;16663514;16901755
GO:0005875	microtubule associated complex	http://amigo.geneontology.org/amigo/term/GO:0005875	143	7	1.43091	4.89199	0.000594	0.0466485	1062;6790;9585;9928;10112;55143;81930	geneontology_Cellular_Component	16989636;16697695;16978568;16920548;16736891;16707221;16662648
GO:0044843	cell cycle G1/S phase transition	http://amigo.geneontology.org/amigo/term/GO:0044843	236	9	2.3615	3.81113	0.00063	0.0490109	891;995;5557;6790;7465;8900;9928;23649;81610	geneontology_Biological_Process	16697695;16985599;16721835;16920548;16774053;16913681;16726790;17000439;16766318

## Sheet: Table S35.GEO2R_WG_all
Supplementary Table S35. List of GO terms identified by WebGestalt’s ORA using all DEGs detected by GEO2R - GSE113427
geneSet	description	link	size	overlap	expect	enrichmentRatio	pValue	FDR	overlapId	database	userId
GO:0005819	spindle	http://amigo.geneontology.org/amigo/term/GO:0005819	313	15	1.93713	7.74342	8.86355e-10	4.96202e-06	891;1062;4751;5347;6790;9585;9787;9928;10112;10274;26586;29899;55143;81610;259266	geneontology_Cellular_Component	16989636;16817017;16697695;16985599;16959531;16698984;16697544;16793225;16978568;16920548;16913681;16775014;16707221;16662648;16668079
GO:0000922	spindle pole	http://amigo.geneontology.org/amigo/term/GO:0000922	142	11	0.878825	12.5167	1.22716e-09	4.96202e-06	891;4751;5347;6790;9585;9787;10274;26586;29899;81610;259266	geneontology_Cellular_Component	16817017;16985599;16959531;16698984;16697544;16793225;16920548;16913681;16775014;16707221;16668079
GO:0007088	regulation of mitotic nuclear division	http://amigo.geneontology.org/amigo/term/GO:0007088	171	11	1.0583	10.394	8.75217e-09	2.05306e-05	891;1062;4751;5347;6790;8900;9232;9585;9787;10274;79866	geneontology_Biological_Process	16817017;16985599;16959531;16698984;16793225;16775324;16978568;16920548;16774053;16991741;16707221
GO:0097431	mitotic spindle pole	http://amigo.geneontology.org/amigo/term/GO:0097431	26	6	0.160912	37.2876	1.01549e-08	2.05306e-05	6790;9585;10274;29899;81610;259266	geneontology_Cellular_Component	16959531;16697544;16920548;16913681;16707221;16668079
GO:0140014	mitotic nuclear division	http://amigo.geneontology.org/amigo/term/GO:0140014	272	13	1.68338	7.72255	1.31881e-08	2.13304e-05	891;1062;4751;5347;6790;8900;9232;9585;9787;9928;10274;55143;79866	geneontology_Biological_Process	16817017;16697695;16985599;16959531;16698984;16793225;16775324;16978568;16920548;16774053;16991741;16707221;16662648
GO:0000280	nuclear division	http://amigo.geneontology.org/amigo/term/GO:0000280	408	15	2.52507	5.94042	3.16496e-08	3.95141e-05	891;1062;4751;5347;6790;8900;9232;9585;9787;9928;10274;55143;79866;151246;259266	geneontology_Biological_Process	16817017;16697695;16985599;16959531;16698984;16697544;16793225;16775324;16978568;16920548;16774053;16991741;16707221;16662648;16889251
GO:0051783	regulation of nuclear division	http://amigo.geneontology.org/amigo/term/GO:0051783	195	11	1.20684	9.11474	3.42029e-08	3.95141e-05	891;1062;4751;5347;6790;8900;9232;9585;9787;10274;79866	geneontology_Biological_Process	16817017;16985599;16959531;16698984;16793225;16775324;16978568;16920548;16774053;16991741;16707221
GO:0051233	spindle midzone	http://amigo.geneontology.org/amigo/term/GO:0051233	33	6	0.204234	29.3781	4.71668e-08	4.76798e-05	1062;5347;6790;9585;9928;55143	geneontology_Cellular_Component	16817017;16697695;16978568;16920548;16707221;16662648
GO:0048285	organelle fission	http://amigo.geneontology.org/amigo/term/GO:0048285	444	15	2.74787	5.45876	9.57605e-08	8.60462e-05	891;1062;4751;5347;6790;8900;9232;9585;9787;9928;10274;55143;79866;151246;259266	geneontology_Biological_Process	16817017;16697695;16985599;16959531;16698984;16697544;16793225;16775324;16978568;16920548;16774053;16991741;16707221;16662648;16889251
GO:0033038	bitter taste receptor activity	http://amigo.geneontology.org/amigo/term/GO:0033038	23	5	0.142345	35.126	2.54457e-07	0.00020578	50838;50839;50840;259290;259296	geneontology_Molecular_Function	16761518;16761502;16761498;16761495;16761507
GO:0007052	mitotic spindle organization	http://amigo.geneontology.org/amigo/term/GO:0007052	106	8	0.656024	12.1947	3.01634e-07	0.000221756	891;1062;4751;5347;6790;10274;29899;79866	geneontology_Biological_Process	16817017;16985599;16959531;16698984;16775324;16978568;16920548;16668079
GO:0007059	chromosome segregation	http://amigo.geneontology.org/amigo/term/GO:0007059	301	12	1.86286	6.44171	3.53491e-07	0.000238224	672;891;1062;4751;5347;9232;9787;9928;10274;55143;81610;151246	geneontology_Biological_Process	16817017;16697695;16985599;16959531;16698984;16793225;16978568;16845349;16991741;16913681;16662648;16889251
GO:0030496	midbody	http://amigo.geneontology.org/amigo/term/GO:0030496	164	9	1.01498	8.86716	8.08479e-07	0.000502936	1062;4751;5347;6790;9585;9928;10112;55143;259266	geneontology_Cellular_Component	16989636;16817017;16697695;16698984;16697544;16978568;16920548;16707221;16662648
GO:0008527	taste receptor activity	http://amigo.geneontology.org/amigo/term/GO:0008527	29	5	0.179478	27.8585	8.71912e-07	0.000503654	50838;50839;50840;259290;259296	geneontology_Molecular_Function	16761518;16761502;16761498;16761495;16761507
GO:0007051	spindle organization	http://amigo.geneontology.org/amigo/term/GO:0007051	169	9	1.04593	8.60482	1.03961e-06	0.000560486	891;1062;4751;5347;6790;10274;29899;79866;259266	geneontology_Biological_Process	16817017;16985599;16959531;16698984;16697544;16775324;16978568;16920548;16668079
GO:1902850	microtubule cytoskeleton organization involved in mitosis	http://amigo.geneontology.org/amigo/term/GO:1902850	127	8	0.785991	10.1782	1.20451e-06	0.000608807	891;1062;4751;5347;6790;10274;29899;79866	geneontology_Biological_Process	16817017;16985599;16959531;16698984;16775324;16978568;16920548;16668079
GO:0000819	sister chromatid segregation	http://amigo.geneontology.org/amigo/term/GO:0000819	175	9	1.08306	8.3098	1.39054e-06	0.000661489	891;1062;4751;5347;9232;9787;9928;55143;151246	geneontology_Biological_Process	16817017;16697695;16985599;16698984;16793225;16978568;16991741;16662648;16889251
GO:0072686	mitotic spindle	http://amigo.geneontology.org/amigo/term/GO:0072686	92	7	0.569379	12.2941	1.62261e-06	0.000729003	1062;6790;9585;10274;29899;81610;259266	geneontology_Cellular_Component	16959531;16697544;16978568;16920548;16913681;16707221;16668079
GO:0050909	sensory perception of taste	http://amigo.geneontology.org/amigo/term/GO:0050909	63	6	0.389901	15.3885	2.48975e-06	0.00105972	9311;50838;50839;50840;259290;259296	geneontology_Biological_Process	16761518;16761502;17053535;16761498;16761495;16761507
GO:0098813	nuclear chromosome segregation	http://amigo.geneontology.org/amigo/term/GO:0098813	247	10	1.52866	6.54168	3.08277e-06	0.00124652	891;1062;4751;5347;9232;9787;9928;55143;81610;151246	geneontology_Biological_Process	16817017;16697695;16985599;16698984;16793225;16978568;16991741;16913681;16662648;16889251
GO:0000070	mitotic sister chromatid segregation	http://amigo.geneontology.org/amigo/term/GO:0000070	148	8	0.915958	8.73402	3.80292e-06	0.00146449	891;1062;4751;5347;9232;9787;9928;55143	geneontology_Biological_Process	16817017;16697695;16985599;16698984;16793225;16978568;16991741;16662648
GO:0001580	detection of chemical stimulus involved in sensory perception of bitter taste	http://amigo.geneontology.org/amigo/term/GO:0001580	39	5	0.241367	20.7153	4.02446e-06	0.00147748	50838;50839;50840;259290;259296	geneontology_Biological_Process	16761518;16761502;16761498;16761495;16761507
GO:0000910	cytokinesis	http://amigo.geneontology.org/amigo/term/GO:0000910	150	8	0.928336	8.61757	4.20207e-06	0.00147748	5347;5921;6790;9585;9928;10112;26586;50838	geneontology_Biological_Process	16989636;16817017;16697695;16761498;16920548;16987008;16775014;16707221
GO:0051303	establishment of chromosome localization	http://amigo.geneontology.org/amigo/term/GO:0051303	72	6	0.445601	13.465	5.47301e-06	0.00184418	891;1062;9787;9928;55143;81610	geneontology_Biological_Process	16697695;16985599;16793225;16978568;16913681;16662648
GO:0050000	chromosome localization	http://amigo.geneontology.org/amigo/term/GO:0050000	73	6	0.45179	13.2805	5.93337e-06	0.00191933	891;1062;9787;9928;55143;81610	geneontology_Biological_Process	16697695;16985599;16793225;16978568;16913681;16662648
GO:0050913	sensory perception of bitter taste	http://amigo.geneontology.org/amigo/term/GO:0050913	43	5	0.266123	18.7883	6.59747e-06	0.00205207	50838;50839;50840;259290;259296	geneontology_Biological_Process	16761518;16761502;16761498;16761495;16761507
GO:0032465	regulation of cytokinesis	http://amigo.geneontology.org/amigo/term/GO:0032465	76	6	0.470357	12.7563	7.50647e-06	0.00224833	5347;6790;9585;9928;10112;50838	geneontology_Biological_Process	16989636;16817017;16697695;16761498;16920548;16707221
GO:0050912	detection of chemical stimulus involved in sensory perception of taste	http://amigo.geneontology.org/amigo/term/GO:0050912	45	5	0.278501	17.9533	8.29185e-06	0.00236828	50838;50839;50840;259290;259296	geneontology_Biological_Process	16761518;16761502;16761498;16761495;16761507
GO:0070507	regulation of microtubule cytoskeleton organization	http://amigo.geneontology.org/amigo/term/GO:0070507	165	8	1.02117	7.83415	8.49267e-06	0.00236828	672;4751;5347;6790;10274;26586;29899;79866	geneontology_Biological_Process	16817017;16959531;16698984;16775324;16920548;16845349;16775014;16668079
GO:0000086	G2/M transition of mitotic cell cycle	http://amigo.geneontology.org/amigo/term/GO:0000086	182	8	1.12638	7.10239	1.7348e-05	0.00467646	672;891;4751;5347;6790;7465;9928;79866	geneontology_Biological_Process	16817017;16697695;16985599;16698984;16775324;16920548;16845349;16721835
GO:0000775	chromosome, centromeric region	http://amigo.geneontology.org/amigo/term/GO:0000775	187	8	1.15733	6.91249	2.10959e-05	0.00550331	891;1062;4751;5347;6790;10274;55143;151246	geneontology_Cellular_Component	16817017;16985599;16959531;16698984;16978568;16920548;16662648;16889251
GO:0010965	regulation of mitotic sister chromatid separation	http://amigo.geneontology.org/amigo/term/GO:0010965	55	5	0.34039	14.689	2.24787e-05	0.00550864	891;1062;5347;9232;9787	geneontology_Biological_Process	16817017;16985599;16793225;16978568;16991741
GO:0051310	metaphase plate congression	http://amigo.geneontology.org/amigo/term/GO:0051310	55	5	0.34039	14.689	2.24787e-05	0.00550864	891;1062;9928;55143;81610	geneontology_Biological_Process	16697695;16985599;16978568;16913681;16662648
GO:0032886	regulation of microtubule-based process	http://amigo.geneontology.org/amigo/term/GO:0032886	193	8	1.19446	6.69759	2.64692e-05	0.00615571	672;4751;5347;6790;10274;26586;29899;79866	geneontology_Biological_Process	16817017;16959531;16698984;16775324;16920548;16845349;16775014;16668079
GO:0090068	positive regulation of cell cycle process	http://amigo.geneontology.org/amigo/term/GO:0090068	252	9	1.5596	5.77069	2.66415e-05	0.00615571	672;891;6790;9585;9787;9928;29899;50838;81610	geneontology_Biological_Process	16697695;16985599;16793225;16761498;16920548;16845349;16913681;16707221;16668079
GO:0051983	regulation of chromosome segregation	http://amigo.geneontology.org/amigo/term/GO:0051983	96	6	0.594135	10.0987	2.88031e-05	0.00637686	891;1062;4751;5347;9232;9787	geneontology_Biological_Process	16817017;16985599;16698984;16793225;16978568;16991741
GO:0051306	mitotic sister chromatid separation	http://amigo.geneontology.org/amigo/term/GO:0051306	58	5	0.358957	13.9293	2.91757e-05	0.00637686	891;1062;5347;9232;9787	geneontology_Biological_Process	16817017;16985599;16793225;16978568;16991741
GO:0044839	cell cycle G2/M phase transition	http://amigo.geneontology.org/amigo/term/GO:0044839	200	8	1.23778	6.46318	3.41444e-05	0.00714053	672;891;4751;5347;6790;7465;9928;79866	geneontology_Biological_Process	16817017;16697695;16985599;16698984;16775324;16920548;16845349;16721835
GO:1905818	regulation of chromosome separation	http://amigo.geneontology.org/amigo/term/GO:1905818	60	5	0.371334	13.465	3.44356e-05	0.00714053	891;1062;5347;9232;9787	geneontology_Biological_Process	16817017;16985599;16793225;16978568;16991741
GO:0051302	regulation of cell division	http://amigo.geneontology.org/amigo/term/GO:0051302	151	7	0.934525	7.49044	4.23896e-05	0.00857012	5347;6790;9585;9928;10112;50838;259266	geneontology_Biological_Process	16989636;16817017;16697695;16697544;16761498;16920548;16707221
GO:0033047	regulation of mitotic sister chromatid segregation	http://amigo.geneontology.org/amigo/term/GO:0033047	66	5	0.408468	12.2409	5.47152e-05	0.0107922	891;1062;5347;9232;9787	geneontology_Biological_Process	16817017;16985599;16793225;16978568;16991741
GO:0000793	condensed chromosome	http://amigo.geneontology.org/amigo/term/GO:0000793	216	8	1.3368	5.98442	5.88821e-05	0.0113376	672;891;1062;4751;5347;6790;10274;151246	geneontology_Cellular_Component	16817017;16985599;16959531;16698984;16978568;16920548;16845349;16889251
GO:0051225	spindle assembly	http://amigo.geneontology.org/amigo/term/GO:0051225	110	6	0.68078	8.81342	6.20543e-05	0.0115115	4751;5347;6790;10274;29899;259266	geneontology_Biological_Process	16817017;16959531;16698984;16697544;16920548;16668079
GO:0060236	regulation of mitotic spindle organization	http://amigo.geneontology.org/amigo/term/GO:0060236	35	4	0.216612	18.4662	6.26322e-05	0.0115115	5347;10274;29899;79866	geneontology_Biological_Process	16817017;16959531;16775324;16668079
GO:0045787	positive regulation of cell cycle	http://amigo.geneontology.org/amigo/term/GO:0045787	353	10	2.18468	4.57732	6.73268e-05	0.0120994	672;891;6790;8900;9585;9787;9928;29899;50838;81610	geneontology_Biological_Process	16697695;16985599;16793225;16761498;16920548;16774053;16845349;16913681;16707221;16668079
GO:0031145	anaphase-promoting complex-dependent catabolic process	http://amigo.geneontology.org/amigo/term/GO:0031145	36	4	0.222801	17.9533	7.0127e-05	0.0123286	891;5347;6790;9232	geneontology_Biological_Process	16817017;16985599;16920548;16991741
GO:0000779	condensed chromosome, centromeric region	http://amigo.geneontology.org/amigo/term/GO:0000779	113	6	0.699346	8.57944	7.21126e-05	0.012408	891;1062;4751;5347;6790;151246	geneontology_Cellular_Component	16817017;16985599;16698984;16978568;16920548;16889251
GO:1901987	regulation of cell cycle phase transition	http://amigo.geneontology.org/amigo/term/GO:1901987	366	10	2.26514	4.41474	9.08529e-05	0.0153068	672;891;1062;4751;5347;6790;7465;9787;9928;81610	geneontology_Biological_Process	16817017;16697695;16985599;16698984;16793225;16978568;16920548;16845349;16721835;16913681
GO:0090224	regulation of spindle organization	http://amigo.geneontology.org/amigo/term/GO:0090224	39	4	0.241367	16.5723	9.6534e-05	0.0159321	5347;10274;29899;79866	geneontology_Biological_Process	16817017;16959531;16775324;16668079
GO:0033045	regulation of sister chromatid segregation	http://amigo.geneontology.org/amigo/term/GO:0033045	75	5	0.464168	10.772	0.000101111	0.0163537	891;1062;5347;9232;9787	geneontology_Biological_Process	16817017;16985599;16793225;16978568;16991741
GO:0000281	mitotic cytokinesis	http://amigo.geneontology.org/amigo/term/GO:0000281	78	5	0.482735	10.3577	0.000121872	0.0193251	5347;5921;9585;10112;26586	geneontology_Biological_Process	16989636;16817017;16987008;16775014;16707221
GO:0005874	microtubule	http://amigo.geneontology.org/amigo/term/GO:0005874	385	10	2.38273	4.19687	0.000137581	0.0212828	1062;4751;5347;6790;9585;9928;10112;26586;259266;283431	geneontology_Cellular_Component	16989636;16817017;16697695;16698984;16697544;16978568;16920548;16755692;16775014;16707221
GO:0044772	mitotic cell cycle phase transition	http://amigo.geneontology.org/amigo/term/GO:0044772	464	11	2.87165	3.83055	0.000141073	0.0212828	672;891;1062;4751;5347;6790;7465;8900;9787;9928;79866	geneontology_Biological_Process	16817017;16697695;16985599;16698984;16793225;16775324;16978568;16920548;16774053;16845349;16721835
GO:0007080	mitotic metaphase plate congression	http://amigo.geneontology.org/amigo/term/GO:0007080	43	4	0.266123	15.0306	0.000142114	0.0212828	891;1062;9928;55143	geneontology_Biological_Process	16697695;16985599;16978568;16662648
GO:0098687	chromosomal region	http://amigo.geneontology.org/amigo/term/GO:0098687	321	9	1.98664	4.53026	0.00017063	0.0250888	891;1062;4751;5347;6790;10274;55143;80119;151246	geneontology_Cellular_Component	16817017;16985599;16959531;16698984;16978568;16920548;16810585;16662648;16889251
GO:0051304	chromosome separation	http://amigo.geneontology.org/amigo/term/GO:0051304	88	5	0.544624	9.18065	0.00021536	0.0311003	891;1062;5347;9232;9787	geneontology_Biological_Process	16817017;16985599;16793225;16978568;16991741
GO:1901990	regulation of mitotic cell cycle phase transition	http://amigo.geneontology.org/amigo/term/GO:1901990	336	9	2.07947	4.32802	0.000239622	0.0339157	672;891;1062;4751;5347;6790;7465;9787;9928	geneontology_Biological_Process	16817017;16697695;16985599;16698984;16793225;16978568;16920548;16845349;16721835
GO:0010389	regulation of G2/M transition of mitotic cell cycle	http://amigo.geneontology.org/amigo/term/GO:0010389	141	6	0.872636	6.87572	0.000243244	0.0339157	672;891;4751;5347;6790;9928	geneontology_Biological_Process	16817017;16697695;16985599;16698984;16920548;16845349
GO:0061640	cytoskeleton-dependent cytokinesis	http://amigo.geneontology.org/amigo/term/GO:0061640	91	5	0.56319	8.87799	0.000251926	0.0345309	5347;5921;9585;10112;26586	geneontology_Biological_Process	16989636;16817017;16987008;16775014;16707221
GO:0030071	regulation of mitotic metaphase/anaphase transition	http://amigo.geneontology.org/amigo/term/GO:0030071	50	4	0.309445	12.9264	0.000256536	0.0345767	891;1062;5347;9787	geneontology_Biological_Process	16817017;16985599;16793225;16978568
GO:0005875	microtubule associated complex	http://amigo.geneontology.org/amigo/term/GO:0005875	143	6	0.885014	6.77956	0.000262471	0.0347968	1062;6790;9585;9928;10112;55143	geneontology_Cellular_Component	16989636;16697695;16978568;16920548;16707221;16662648
GO:1902099	regulation of metaphase/anaphase transition of cell cycle	http://amigo.geneontology.org/amigo/term/GO:1902099	52	4	0.321823	12.4292	0.000298719	0.038345	891;1062;5347;9787	geneontology_Biological_Process	16817017;16985599;16793225;16978568
GO:0005871	kinesin complex	http://amigo.geneontology.org/amigo/term/GO:0005871	52	4	0.321823	12.4292	0.000298719	0.038345	1062;9585;9928;10112	geneontology_Cellular_Component	16989636;16697695;16978568;16707221
GO:0007091	metaphase/anaphase transition of mitotic cell cycle	http://amigo.geneontology.org/amigo/term/GO:0007091	53	4	0.328012	12.1947	0.000321575	0.040634	891;1062;5347;9787	geneontology_Biological_Process	16817017;16985599;16793225;16978568
GO:0044784	metaphase/anaphase transition of cell cycle	http://amigo.geneontology.org/amigo/term/GO:0044784	55	4	0.34039	11.7512	0.000371006	0.0450184	891;1062;5347;9787	geneontology_Biological_Process	16817017;16985599;16793225;16978568
GO:0000794	condensed nuclear chromosome	http://amigo.geneontology.org/amigo/term/GO:0000794	99	5	0.612702	8.16058	0.000372605	0.0450184	672;891;4751;5347;6790	geneontology_Cellular_Component	16817017;16985599;16698984;16920548;16845349
GO:0000780	condensed nuclear chromosome, centromeric region	http://amigo.geneontology.org/amigo/term/GO:0000780	23	3	0.142345	21.0756	0.000372973	0.0450184	891;5347;6790	geneontology_Cellular_Component	16817017;16985599;16920548
GO:0000777	condensed chromosome kinetochore	http://amigo.geneontology.org/amigo/term/GO:0000777	100	5	0.618891	8.07897	0.000390305	0.0464176	891;1062;4751;5347;151246	geneontology_Cellular_Component	16817017;16985599;16698984;16978568;16889251
GO:0051642	centrosome localization	http://amigo.geneontology.org/amigo/term/GO:0051642	24	3	0.148534	20.1974	0.000424342	0.0497341	6790;29899;259266	geneontology_Biological_Process	16697544;16920548;16668079

## Sheet: Table S36.CARMAweb_WG_all
Supplementary Table S36. List of GO terms identified by WebGestalt’s ORA using all DEGs detected by CARMAweb - dataset GSE113427
geneSet	description	link	size	overlap	expect	enrichmentRatio	pValue	FDR	overlapId	database	userId
GO:0005819	spindle	http://amigo.geneontology.org/amigo/term/GO:0005819	313	16	1.84661	8.66454	4.23512e-11	3.42494e-07	891;1062;4751;5347;6790;9585;9787;9928;10112;10274;26586;29899;55143;81610;81930;259266	geneontology_Cellular_Component	ASPM;AURKA;FAM83D;KIF20A;NEK2;STAG1;KIF14;KIF18A;GPSM2;DLGAP5;CCNB1;CDCA8;CKAP2;KIF20B;CENPE;PLK1
GO:0000280	nuclear division	http://amigo.geneontology.org/amigo/term/GO:0000280	408	17	2.40708	7.0625	2.40232e-10	9.71378e-07	891;1062;4751;5347;6790;8900;9232;9585;9787;9928;10274;55143;79866;81930;146956;151246;259266	geneontology_Biological_Process	ASPM;AURKA;NEK2;STAG1;KIF14;KIF18A;DLGAP5;CCNA1;CCNB1;CDCA8;BORA;KIF20B;CENPE;EME1;SGO2;PTTG1;PLK1
GO:0140014	mitotic nuclear division	http://amigo.geneontology.org/amigo/term/GO:0140014	272	14	1.60472	8.72426	7.04265e-10	1.18196e-06	891;1062;4751;5347;6790;8900;9232;9585;9787;9928;10274;55143;79866;81930	geneontology_Biological_Process	AURKA;NEK2;STAG1;KIF14;KIF18A;DLGAP5;CCNA1;CCNB1;CDCA8;BORA;KIF20B;CENPE;PTTG1;PLK1
GO:0000922	spindle pole	http://amigo.geneontology.org/amigo/term/GO:0000922	142	11	0.837758	13.1303	7.30621e-10	1.18196e-06	891;4751;5347;6790;9585;9787;10274;26586;29899;81610;259266	geneontology_Cellular_Component	ASPM;AURKA;FAM83D;NEK2;STAG1;GPSM2;DLGAP5;CCNB1;CKAP2;KIF20B;PLK1
GO:0051233	spindle midzone	http://amigo.geneontology.org/amigo/term/GO:0051233	33	7	0.19469	35.9545	7.60633e-10	1.18196e-06	1062;5347;6790;9585;9928;55143;81930	geneontology_Cellular_Component	AURKA;KIF14;KIF18A;CDCA8;KIF20B;CENPE;PLK1
GO:0048285	organelle fission	http://amigo.geneontology.org/amigo/term/GO:0048285	444	17	2.61947	6.48986	8.7693e-10	1.18196e-06	891;1062;4751;5347;6790;8900;9232;9585;9787;9928;10274;55143;79866;81930;146956;151246;259266	geneontology_Biological_Process	ASPM;AURKA;NEK2;STAG1;KIF14;KIF18A;DLGAP5;CCNA1;CCNB1;CDCA8;BORA;KIF20B;CENPE;EME1;SGO2;PTTG1;PLK1
GO:0007059	chromosome segregation	http://amigo.geneontology.org/amigo/term/GO:0007059	301	14	1.77581	7.88372	2.61593e-09	3.02214e-06	672;891;1062;4751;5347;9232;9787;9928;10274;55143;81610;81930;146956;151246	geneontology_Biological_Process	BRCA1;FAM83D;NEK2;STAG1;KIF14;KIF18A;DLGAP5;CCNB1;CDCA8;CENPE;EME1;SGO2;PTTG1;PLK1
GO:0007088	regulation of mitotic nuclear division	http://amigo.geneontology.org/amigo/term/GO:0007088	171	11	1.00885	10.9035	5.25114e-09	5.30824e-06	891;1062;4751;5347;6790;8900;9232;9585;9787;10274;79866	geneontology_Biological_Process	AURKA;NEK2;STAG1;DLGAP5;CCNA1;CCNB1;BORA;KIF20B;CENPE;PTTG1;PLK1
GO:0097431	mitotic spindle pole	http://amigo.geneontology.org/amigo/term/GO:0097431	26	6	0.153392	39.1154	7.60398e-09	6.83259e-06	6790;9585;10274;29899;81610;259266	geneontology_Cellular_Component	ASPM;AURKA;FAM83D;STAG1;GPSM2;KIF20B
GO:0051783	regulation of nuclear division	http://amigo.geneontology.org/amigo/term/GO:0051783	195	11	1.15044	9.56154	2.06522e-08	1.67015e-05	891;1062;4751;5347;6790;8900;9232;9585;9787;10274;79866	geneontology_Biological_Process	AURKA;NEK2;STAG1;DLGAP5;CCNA1;CCNB1;BORA;KIF20B;CENPE;PTTG1;PLK1
GO:0098813	nuclear chromosome segregation	http://amigo.geneontology.org/amigo/term/GO:0098813	247	12	1.45723	8.23482	2.40028e-08	1.76464e-05	891;1062;4751;5347;9232;9787;9928;55143;81610;81930;146956;151246	geneontology_Biological_Process	FAM83D;NEK2;KIF14;KIF18A;DLGAP5;CCNB1;CDCA8;CENPE;EME1;SGO2;PTTG1;PLK1
GO:0072686	mitotic spindle	http://amigo.geneontology.org/amigo/term/GO:0072686	92	8	0.542773	14.7391	6.87407e-08	4.63255e-05	1062;6790;9585;10274;29899;81610;81930;259266	geneontology_Cellular_Component	ASPM;AURKA;FAM83D;STAG1;KIF18A;GPSM2;KIF20B;CENPE
GO:0000819	sister chromatid segregation	http://amigo.geneontology.org/amigo/term/GO:0000819	175	10	1.03245	9.68571	8.32644e-08	5.17969e-05	891;1062;4751;5347;9232;9787;9928;55143;81930;151246	geneontology_Biological_Process	NEK2;KIF14;KIF18A;DLGAP5;CCNB1;CDCA8;CENPE;SGO2;PTTG1;PLK1
GO:0007052	mitotic spindle organization	http://amigo.geneontology.org/amigo/term/GO:0007052	106	8	0.625369	12.7925	2.08121e-07	0.000113776	891;1062;4751;5347;6790;10274;29899;79866	geneontology_Biological_Process	AURKA;NEK2;STAG1;GPSM2;CCNB1;BORA;CENPE;PLK1
GO:0051303	establishment of chromosome localization	http://amigo.geneontology.org/amigo/term/GO:0051303	72	7	0.424779	16.4792	2.17375e-07	0.000113776	891;1062;9787;9928;55143;81610;81930	geneontology_Biological_Process	FAM83D;KIF14;KIF18A;DLGAP5;CCNB1;CDCA8;CENPE
GO:0000070	mitotic sister chromatid segregation	http://amigo.geneontology.org/amigo/term/GO:0000070	148	9	0.873156	10.3074	2.25104e-07	0.000113776	891;1062;4751;5347;9232;9787;9928;55143;81930	geneontology_Biological_Process	NEK2;KIF14;KIF18A;DLGAP5;CCNB1;CDCA8;CENPE;PTTG1;PLK1
GO:0050000	chromosome localization	http://amigo.geneontology.org/amigo/term/GO:0050000	73	7	0.430678	16.2534	2.39276e-07	0.000113825	891;1062;9787;9928;55143;81610;81930	geneontology_Biological_Process	FAM83D;KIF14;KIF18A;DLGAP5;CCNB1;CDCA8;CENPE
GO:0030496	midbody	http://amigo.geneontology.org/amigo/term/GO:0030496	164	9	0.967552	9.30183	5.37751e-07	0.000240916	1062;4751;5347;6790;9585;9928;10112;55143;259266	geneontology_Cellular_Component	ASPM;AURKA;KIF20A;NEK2;KIF14;CDCA8;KIF20B;CENPE;PLK1
GO:0070507	regulation of microtubule cytoskeleton organization	http://amigo.geneontology.org/amigo/term/GO:0070507	165	9	0.973451	9.24545	5.6602e-07	0.000240916	672;4751;5347;6790;10274;26586;29899;79866;81930	geneontology_Biological_Process	BRCA1;AURKA;NEK2;STAG1;KIF18A;GPSM2;CKAP2;BORA;PLK1
GO:0007051	spindle organization	http://amigo.geneontology.org/amigo/term/GO:0007051	169	9	0.99705	9.02663	6.92379e-07	0.000279964	891;1062;4751;5347;6790;10274;29899;79866;259266	geneontology_Biological_Process	ASPM;AURKA;NEK2;STAG1;GPSM2;CCNB1;BORA;CENPE;PLK1
GO:0051310	metaphase plate congression	http://amigo.geneontology.org/amigo/term/GO:0051310	55	6	0.324484	18.4909	8.33911e-07	0.000307149	891;1062;9928;55143;81610;81930	geneontology_Biological_Process	FAM83D;KIF14;KIF18A;CCNB1;CDCA8;CENPE
GO:1902850	microtubule cytoskeleton organization involved in mitosis	http://amigo.geneontology.org/amigo/term/GO:1902850	127	8	0.749263	10.6772	8.35574e-07	0.000307149	891;1062;4751;5347;6790;10274;29899;79866	geneontology_Biological_Process	AURKA;NEK2;STAG1;GPSM2;CCNB1;BORA;CENPE;PLK1
GO:0000086	G2/M transition of mitotic cell cycle	http://amigo.geneontology.org/amigo/term/GO:0000086	182	9	1.07375	8.38187	1.28654e-06	0.00045236	672;891;3161;4751;5347;6790;7465;9928;79866	geneontology_Biological_Process	BRCA1;HMMR;AURKA;NEK2;KIF14;CCNB1;BORA;WEE1;PLK1
GO:0000775	chromosome, centromeric region	http://amigo.geneontology.org/amigo/term/GO:0000775	187	9	1.10324	8.15775	1.61133e-06	0.000542951	891;1062;4751;5347;6790;10274;55143;81930;151246	geneontology_Cellular_Component	AURKA;NEK2;STAG1;KIF18A;CCNB1;CDCA8;CENPE;SGO2;PLK1
GO:0032886	regulation of microtubule-based process	http://amigo.geneontology.org/amigo/term/GO:0032886	193	9	1.13864	7.90415	2.09245e-06	0.000676865	672;4751;5347;6790;10274;26586;29899;79866;81930	geneontology_Biological_Process	BRCA1;AURKA;NEK2;STAG1;KIF18A;GPSM2;CKAP2;BORA;PLK1
GO:0044839	cell cycle G2/M phase transition	http://amigo.geneontology.org/amigo/term/GO:0044839	200	9	1.17994	7.6275	2.80589e-06	0.000872739	672;891;3161;4751;5347;6790;7465;9928;79866	geneontology_Biological_Process	BRCA1;HMMR;AURKA;NEK2;KIF14;CCNB1;BORA;WEE1;PLK1
GO:0007080	mitotic metaphase plate congression	http://amigo.geneontology.org/amigo/term/GO:0007080	43	5	0.253687	19.7093	5.21664e-06	0.00156248	891;1062;9928;55143;81930	geneontology_Biological_Process	KIF14;KIF18A;CCNB1;CDCA8;CENPE
GO:0140013	meiotic nuclear division	http://amigo.geneontology.org/amigo/term/GO:0140013	167	8	0.985251	8.11976	6.50132e-06	0.00187772	5347;6790;8900;9232;81930;146956;151246;259266	geneontology_Biological_Process	ASPM;AURKA;KIF18A;CCNA1;EME1;SGO2;PTTG1;PLK1
GO:1901987	regulation of cell cycle phase transition	http://amigo.geneontology.org/amigo/term/GO:1901987	366	11	2.15929	5.09426	1.04912e-05	0.0029256	672;891;1062;3161;4751;5347;6790;7465;9787;9928;81610	geneontology_Biological_Process	BRCA1;HMMR;AURKA;FAM83D;NEK2;KIF14;DLGAP5;CCNB1;CENPE;WEE1;PLK1
GO:1903046	meiotic cell cycle process	http://amigo.geneontology.org/amigo/term/GO:1903046	184	8	1.08555	7.36957	1.32141e-05	0.00341294	5347;6790;8900;9232;81930;146956;151246;259266	geneontology_Biological_Process	ASPM;AURKA;KIF18A;CCNA1;EME1;SGO2;PTTG1;PLK1
GO:0051304	chromosome separation	http://amigo.geneontology.org/amigo/term/GO:0051304	88	6	0.519174	11.5568	1.33247e-05	0.00341294	891;1062;5347;9232;9787;146956	geneontology_Biological_Process	DLGAP5;CCNB1;CENPE;EME1;PTTG1;PLK1
GO:0005871	kinesin complex	http://amigo.geneontology.org/amigo/term/GO:0005871	52	5	0.306785	16.2981	1.35049e-05	0.00341294	1062;9585;9928;10112;81930	geneontology_Cellular_Component	KIF20A;KIF14;KIF18A;KIF20B;CENPE
GO:0051321	meiotic cell cycle	http://amigo.geneontology.org/amigo/term/GO:0051321	246	9	1.45133	6.20122	1.49711e-05	0.00366884	4751;5347;6790;8900;9232;81930;146956;151246;259266	geneontology_Biological_Process	ASPM;AURKA;NEK2;KIF18A;CCNA1;EME1;SGO2;PTTG1;PLK1
GO:0005874	microtubule	http://amigo.geneontology.org/amigo/term/GO:0005874	385	11	2.27139	4.84286	1.68168e-05	0.00399993	1062;4751;5347;6790;9585;9928;10112;26586;81930;259266;283431	geneontology_Cellular_Component	ASPM;AURKA;KIF20A;NEK2;KIF14;KIF18A;CKAP2;KIF20B;CENPE;GAS2L3;PLK1
GO:0010965	regulation of mitotic sister chromatid separation	http://amigo.geneontology.org/amigo/term/GO:0010965	55	5	0.324484	15.4091	1.78252e-05	0.00411864	891;1062;5347;9232;9787	geneontology_Biological_Process	DLGAP5;CCNB1;CENPE;PTTG1;PLK1
GO:0044772	mitotic cell cycle phase transition	http://amigo.geneontology.org/amigo/term/GO:0044772	464	12	2.73746	4.38362	1.83735e-05	0.00412741	672;891;1062;3161;4751;5347;6790;7465;8900;9787;9928;79866	geneontology_Biological_Process	BRCA1;HMMR;AURKA;NEK2;KIF14;DLGAP5;CCNA1;CCNB1;BORA;CENPE;WEE1;PLK1
GO:0098687	chromosomal region	http://amigo.geneontology.org/amigo/term/GO:0098687	321	10	1.89381	5.28037	1.99136e-05	0.00425915	891;1062;4751;5347;6790;10274;55143;80119;81930;151246	geneontology_Cellular_Component	AURKA;NEK2;STAG1;KIF18A;CCNB1;CDCA8;CENPE;PIF1;SGO2;PLK1
GO:0010389	regulation of G2/M transition of mitotic cell cycle	http://amigo.geneontology.org/amigo/term/GO:0010389	141	7	0.831858	8.41489	2.00133e-05	0.00425915	672;891;3161;4751;5347;6790;9928	geneontology_Biological_Process	BRCA1;HMMR;AURKA;NEK2;KIF14;CCNB1;PLK1
GO:0005875	microtubule associated complex	http://amigo.geneontology.org/amigo/term/GO:0005875	143	7	0.843658	8.2972	2.1923e-05	0.00443649	1062;6790;9585;9928;10112;55143;81930	geneontology_Cellular_Component	AURKA;KIF20A;KIF14;KIF18A;CDCA8;KIF20B;CENPE
GO:0051983	regulation of chromosome segregation	http://amigo.geneontology.org/amigo/term/GO:0051983	96	6	0.566372	10.5938	2.19438e-05	0.00443649	891;1062;4751;5347;9232;9787	geneontology_Biological_Process	NEK2;DLGAP5;CCNB1;CENPE;PTTG1;PLK1
GO:0051306	mitotic sister chromatid separation	http://amigo.geneontology.org/amigo/term/GO:0051306	58	5	0.342183	14.6121	2.31524e-05	0.00456667	891;1062;5347;9232;9787	geneontology_Biological_Process	DLGAP5;CCNB1;CENPE;PTTG1;PLK1
GO:1905818	regulation of chromosome separation	http://amigo.geneontology.org/amigo/term/GO:1905818	60	5	0.353982	14.125	2.73395e-05	0.00526415	891;1062;5347;9232;9787	geneontology_Biological_Process	DLGAP5;CCNB1;CENPE;PTTG1;PLK1
GO:1901990	regulation of mitotic cell cycle phase transition	http://amigo.geneontology.org/amigo/term/GO:1901990	336	10	1.9823	5.04464	2.94164e-05	0.0054827	672;891;1062;3161;4751;5347;6790;7465;9787;9928	geneontology_Biological_Process	BRCA1;HMMR;AURKA;NEK2;KIF14;DLGAP5;CCNB1;CENPE;WEE1;PLK1
GO:0000910	cytokinesis	http://amigo.geneontology.org/amigo/term/GO:0000910	150	7	0.884956	7.91	2.98304e-05	0.0054827	5347;5921;6790;9585;9928;10112;26586	geneontology_Biological_Process	AURKA;KIF20A;KIF14;CKAP2;KIF20B;RASA1;PLK1
GO:0051302	regulation of cell division	http://amigo.geneontology.org/amigo/term/GO:0051302	151	7	0.890855	7.85762	3.11308e-05	0.00559454	2250;5347;6790;9585;9928;10112;259266	geneontology_Biological_Process	ASPM;AURKA;KIF20A;KIF14;KIF20B;FGF5;PLK1
GO:1902749	regulation of cell cycle G2/M phase transition	http://amigo.geneontology.org/amigo/term/GO:1902749	157	7	0.926254	7.55732	3.99501e-05	0.00702341	672;891;3161;4751;5347;6790;9928	geneontology_Biological_Process	BRCA1;HMMR;AURKA;NEK2;KIF14;CCNB1;PLK1
GO:0000793	condensed chromosome	http://amigo.geneontology.org/amigo/term/GO:0000793	216	8	1.27434	6.27778	4.17832e-05	0.00718937	672;891;1062;4751;5347;6790;10274;151246	geneontology_Cellular_Component	BRCA1;AURKA;NEK2;STAG1;CCNB1;CENPE;SGO2;PLK1
GO:0033047	regulation of mitotic sister chromatid segregation	http://amigo.geneontology.org/amigo/term/GO:0033047	66	5	0.389381	12.8409	4.35024e-05	0.00732925	891;1062;5347;9232;9787	geneontology_Biological_Process	DLGAP5;CCNB1;CENPE;PTTG1;PLK1
GO:0051225	spindle assembly	http://amigo.geneontology.org/amigo/term/GO:0051225	110	6	0.648968	9.24545	4.74389e-05	0.00782936	4751;5347;6790;10274;29899;259266	geneontology_Biological_Process	ASPM;AURKA;NEK2;STAG1;GPSM2;PLK1
GO:0060236	regulation of mitotic spindle organization	http://amigo.geneontology.org/amigo/term/GO:0060236	35	4	0.20649	19.3714	5.19465e-05	0.00840182	5347;10274;29899;79866	geneontology_Biological_Process	STAG1;GPSM2;BORA;PLK1
GO:1990023	mitotic spindle midzone	http://amigo.geneontology.org/amigo/term/GO:1990023	13	3	0.0766962	39.1154	5.46234e-05	0.00857981	1062;9585;81930	geneontology_Cellular_Component	KIF18A;KIF20B;CENPE
GO:0000779	condensed chromosome, centromeric region	http://amigo.geneontology.org/amigo/term/GO:0000779	113	6	0.666667	9	5.51688e-05	0.00857981	891;1062;4751;5347;6790;151246	geneontology_Cellular_Component	AURKA;NEK2;CCNB1;CENPE;SGO2;PLK1
GO:0031145	anaphase-promoting complex-dependent catabolic process	http://amigo.geneontology.org/amigo/term/GO:0031145	36	4	0.212389	18.8333	5.81759e-05	0.00887677	891;5347;6790;9232	geneontology_Biological_Process	AURKA;CCNB1;PTTG1;PLK1
GO:0008017	microtubule binding	http://amigo.geneontology.org/amigo/term/GO:0008017	229	8	1.35103	5.9214	6.31032e-05	0.00945029	1062;5347;9585;9928;10112;81610;81930;283431	geneontology_Molecular_Function	FAM83D;KIF20A;KIF14;KIF18A;KIF20B;CENPE;GAS2L3;PLK1
GO:0015631	tubulin binding	http://amigo.geneontology.org/amigo/term/GO:0015631	305	9	1.79941	5.00164	8.01276e-05	0.01143	672;1062;5347;9585;9928;10112;81610;81930;283431	geneontology_Molecular_Function	BRCA1;FAM83D;KIF20A;KIF14;KIF18A;KIF20B;CENPE;GAS2L3;PLK1
GO:0090224	regulation of spindle organization	http://amigo.geneontology.org/amigo/term/GO:0090224	39	4	0.230088	17.3846	8.01379e-05	0.01143	5347;10274;29899;79866	geneontology_Biological_Process	STAG1;GPSM2;BORA;PLK1
GO:0033045	regulation of sister chromatid segregation	http://amigo.geneontology.org/amigo/term/GO:0033045	75	5	0.442478	11.3	8.05629e-05	0.01143	891;1062;5347;9232;9787	geneontology_Biological_Process	DLGAP5;CCNB1;CENPE;PTTG1;PLK1
GO:0032465	regulation of cytokinesis	http://amigo.geneontology.org/amigo/term/GO:0032465	76	5	0.448378	11.1513	8.58356e-05	0.0119681	5347;6790;9585;9928;10112	geneontology_Biological_Process	AURKA;KIF20A;KIF14;KIF20B;PLK1
GO:0000281	mitotic cytokinesis	http://amigo.geneontology.org/amigo/term/GO:0000281	78	5	0.460177	10.8654	9.71744e-05	0.0133195	5347;5921;9585;10112;26586	geneontology_Biological_Process	KIF20A;CKAP2;KIF20B;RASA1;PLK1
GO:0000776	kinetochore	http://amigo.geneontology.org/amigo/term/GO:0000776	127	6	0.749263	8.00787	0.000105625	0.0142365	891;1062;4751;5347;81930;151246	geneontology_Cellular_Component	NEK2;KIF18A;CCNB1;CENPE;SGO2;PLK1
GO:0051493	regulation of cytoskeleton organization	http://amigo.geneontology.org/amigo/term/GO:0051493	473	11	2.79056	3.94186	0.000108371	0.0143671	672;4751;5347;5921;6790;10274;26586;29899;79866;81930;93663	geneontology_Biological_Process	BRCA1;AURKA;NEK2;STAG1;KIF18A;GPSM2;CKAP2;BORA;RASA1;ARHGAP18;PLK1
GO:0003777	microtubule motor activity	http://amigo.geneontology.org/amigo/term/GO:0003777	81	5	0.477876	10.463	0.0001163	0.0151697	1062;9585;9928;10112;81930	geneontology_Molecular_Function	KIF20A;KIF14;KIF18A;KIF20B;CENPE
GO:0090068	positive regulation of cell cycle process	http://amigo.geneontology.org/amigo/term/GO:0090068	252	8	1.48673	5.38095	0.000122826	0.0157665	672;891;6790;9585;9787;9928;29899;81610	geneontology_Biological_Process	BRCA1;AURKA;FAM83D;KIF14;GPSM2;DLGAP5;CCNB1;KIF20B
GO:0061640	cytoskeleton-dependent cytokinesis	http://amigo.geneontology.org/amigo/term/GO:0061640	91	5	0.536873	9.31319	0.000201493	0.0254605	5347;5921;9585;10112;26586	geneontology_Biological_Process	KIF20A;CKAP2;KIF20B;RASA1;PLK1
GO:0030071	regulation of mitotic metaphase/anaphase transition	http://amigo.geneontology.org/amigo/term/GO:0030071	50	4	0.294985	13.56	0.000213501	0.0265628	891;1062;5347;9787	geneontology_Biological_Process	DLGAP5;CCNB1;CENPE;PLK1
GO:0005876	spindle microtubule	http://amigo.geneontology.org/amigo/term/GO:0005876	51	4	0.300885	13.2941	0.000230628	0.0282589	1062;5347;6790;81930	geneontology_Cellular_Component	AURKA;KIF18A;CENPE;PLK1
GO:0045787	positive regulation of cell cycle	http://amigo.geneontology.org/amigo/term/GO:0045787	353	9	2.0826	4.32153	0.00024048	0.0290263	672;891;6790;8900;9585;9787;9928;29899;81610	geneontology_Biological_Process	BRCA1;AURKA;FAM83D;KIF14;GPSM2;DLGAP5;CCNA1;CCNB1;KIF20B
GO:1902099	regulation of metaphase/anaphase transition of cell cycle	http://amigo.geneontology.org/amigo/term/GO:1902099	52	4	0.306785	13.0385	0.000248721	0.0295796	891;1062;5347;9787	geneontology_Biological_Process	DLGAP5;CCNB1;CENPE;PLK1
GO:0007091	metaphase/anaphase transition of mitotic cell cycle	http://amigo.geneontology.org/amigo/term/GO:0007091	53	4	0.312684	12.7925	0.000267814	0.0313885	891;1062;5347;9787	geneontology_Biological_Process	DLGAP5;CCNB1;CENPE;PLK1
GO:0000794	condensed nuclear chromosome	http://amigo.geneontology.org/amigo/term/GO:0000794	99	5	0.584071	8.56061	0.000298579	0.0344944	672;891;4751;5347;6790	geneontology_Cellular_Component	BRCA1;AURKA;NEK2;CCNB1;PLK1
GO:0044784	metaphase/anaphase transition of cell cycle	http://amigo.geneontology.org/amigo/term/GO:0044784	55	4	0.324484	12.3273	0.000309121	0.0351377	891;1062;5347;9787	geneontology_Biological_Process	DLGAP5;CCNB1;CENPE;PLK1
GO:0000777	condensed chromosome kinetochore	http://amigo.geneontology.org/amigo/term/GO:0000777	100	5	0.589971	8.475	0.000312837	0.0351377	891;1062;4751;5347;151246	geneontology_Cellular_Component	NEK2;CCNB1;CENPE;SGO2;PLK1
GO:0000780	condensed nuclear chromosome, centromeric region	http://amigo.geneontology.org/amigo/term/GO:0000780	23	3	0.135693	22.1087	0.000324043	0.0358978	891;5347;6790	geneontology_Cellular_Component	AURKA;CCNB1;PLK1
GO:0051642	centrosome localization	http://amigo.geneontology.org/amigo/term/GO:0051642	24	3	0.141593	21.1875	0.000368752	0.0399385	6790;29899;259266	geneontology_Biological_Process	ASPM;AURKA;GPSM2
GO:0007093	mitotic cell cycle checkpoint	http://amigo.geneontology.org/amigo/term/GO:0007093	160	6	0.943953	6.35625	0.000370395	0.0399385	672;891;5347;6790;7465;146956	geneontology_Biological_Process	BRCA1;AURKA;CCNB1;EME1;WEE1;PLK1
GO:0061842	microtubule organizing center localization	http://amigo.geneontology.org/amigo/term/GO:0061842	25	3	0.147493	20.34	0.000417246	0.0438217	6790;29899;259266	geneontology_Biological_Process	ASPM;AURKA;GPSM2
GO:0008574	ATP-dependent microtubule motor activity, plus-end-directed	http://amigo.geneontology.org/amigo/term/GO:0008574	25	3	0.147493	20.34	0.000417246	0.0438217	9585;9928;81930	geneontology_Molecular_Function	KIF14;KIF18A;KIF20B
GO:0007127	meiosis I	http://amigo.geneontology.org/amigo/term/GO:0007127	109	5	0.643068	7.77523	0.000465574	0.0477789	5347;6790;8900;9232;146956	geneontology_Biological_Process	AURKA;CCNA1;EME1;PTTG1;PLK1
GO:0090169	regulation of spindle assembly	http://amigo.geneontology.org/amigo/term/GO:0090169	26	3	0.153392	19.5577	0.000469654	0.0477789	5347;10274;29899	geneontology_Biological_Process	STAG1;GPSM2;PLK1
GO:0051656	establishment of organelle localization	http://amigo.geneontology.org/amigo/term/GO:0051656	472	10	2.78466	3.5911	0.000472648	0.0477789	891;1062;8448;9787;9928;22871;29899;55143;81610;81930	geneontology_Biological_Process	FAM83D;KIF14;KIF18A;GPSM2;DLGAP5;CCNB1;CDCA8;CENPE;DOC2A;NLGN1

## Sheet: Table S37.DExplore_WG_down
Supplementary Table S37. List of GO terms identified by WebGestalt’s ORA using downregulated genes detected by DExplore - GSE113427
geneSet	description	link	size	overlap	expect	enrichmentRatio	pValue	FDR	overlapId	database	userId
GO:0140014	mitotic nuclear division	http://amigo.geneontology.org/amigo/term/GO:0140014	272	21	1.73058	12.1347	0	0	699;891;899;991;995;1062;4751;5347;6790;8900;9232;9585;9787;9928;10274;11065;27338;55143;79866;81930;84722	geneontology_Biological_Process	16817017;16697695;16698984;16985599;16978568;16775324;16793225;16920548;16959531;16991741;16774053;16736891;16914315;16707221;16662648;16815090;16663514;17000439;16690535;16901755;16875763
GO:0000280	nuclear division	http://amigo.geneontology.org/amigo/term/GO:0000280	408	23	2.59587	8.86023	8.88e-16	3.59e-12	699;891;899;991;995;1062;4751;5347;6790;8900;9232;9585;9787;9928;10274;11065;27338;55143;79866;81930;84722;151246;259266	geneontology_Biological_Process	16817017;16697695;16697544;16698984;16985599;16978568;16775324;16793225;16920548;16959531;16991741;16774053;16889251;16736891;16914315;16707221;16662648;16815090;16663514;17000439;16690535;16901755;16875763
GO:0048285	organelle fission	http://amigo.geneontology.org/amigo/term/GO:0048285	444	23	2.82492	8.14183	5.55e-15	1.5e-11	699;891;899;991;995;1062;4751;5347;6790;8900;9232;9585;9787;9928;10274;11065;27338;55143;79866;81930;84722;151246;259266	geneontology_Biological_Process	16817017;16697695;16697544;16698984;16985599;16978568;16775324;16793225;16920548;16959531;16991741;16774053;16889251;16736891;16914315;16707221;16662648;16815090;16663514;17000439;16690535;16901755;16875763
GO:0007088	regulation of mitotic nuclear division	http://amigo.geneontology.org/amigo/term/GO:0007088	171	16	1.08798	14.7062	1.29e-14	2.6e-11	699;891;899;991;995;1062;4751;5347;6790;8900;9232;9585;9787;10274;11065;79866	geneontology_Biological_Process	16817017;16698984;16985599;16978568;16775324;16793225;16920548;16959531;16991741;16774053;16914315;16707221;16815090;16663514;17000439;16901755
GO:0005819	spindle	http://amigo.geneontology.org/amigo/term/GO:0005819	313	19	1.99144	9.54084	1e-13	1.37e-10	891;991;1062;4751;5347;6790;9585;9787;9793;9928;10112;10274;26586;29899;55143;81610;81930;84722;259266	geneontology_Cellular_Component	16989636;16817017;16697695;16697544;16698984;16985599;16978568;16793225;16920548;16959531;16668079;16775014;16736891;16707221;16662648;16913681;16663514;16690535;16737841
GO:0051783	regulation of nuclear division	http://amigo.geneontology.org/amigo/term/GO:0051783	195	16	1.24067	12.8962	1.02e-13	1.37e-10	699;891;899;991;995;1062;4751;5347;6790;8900;9232;9585;9787;10274;11065;79866	geneontology_Biological_Process	16817017;16698984;16985599;16978568;16775324;16793225;16920548;16959531;16991741;16774053;16914315;16707221;16815090;16663514;17000439;16901755
GO:0000922	spindle pole	http://amigo.geneontology.org/amigo/term/GO:0000922	142	14	0.903465	15.4959	3.11e-13	3.59e-10	891;991;4751;5347;6790;9585;9787;9793;10274;26586;29899;81610;84722;259266	geneontology_Cellular_Component	16817017;16697544;16698984;16985599;16793225;16920548;16959531;16668079;16775014;16707221;16913681;16663514;16690535;16737841
GO:1902850	microtubule cytoskeleton organization involved in mitosis	http://amigo.geneontology.org/amigo/term/GO:1902850	127	12	0.808028	14.851	2.79e-11	2.82e-08	891;991;1058;1062;4751;5347;6790;10252;10274;29899;79866;84722	geneontology_Biological_Process	16817017;16698984;16985599;16978568;16775324;16920548;16959531;16668079;16663514;16877956;16690535;16970435
GO:0000819	sister chromatid segregation	http://amigo.geneontology.org/amigo/term/GO:0000819	175	13	1.11342	11.6757	8.45e-11	7.6e-08	699;891;991;1062;4751;5347;9232;9787;9928;55143;81930;84722;151246	geneontology_Biological_Process	16817017;16697695;16698984;16985599;16978568;16793225;16991741;16889251;16736891;16662648;16663514;16690535;16901755
GO:0000070	mitotic sister chromatid segregation	http://amigo.geneontology.org/amigo/term/GO:0000070	148	12	0.941639	12.7437	1.69e-10	1.37e-07	699;891;991;1062;4751;5347;9232;9787;9928;55143;81930;84722	geneontology_Biological_Process	16817017;16697695;16698984;16985599;16978568;16793225;16991741;16736891;16662648;16663514;16690535;16901755
GO:0098813	nuclear chromosome segregation	http://amigo.geneontology.org/amigo/term/GO:0098813	247	14	1.57152	8.90858	5.55e-10	4.08e-07	699;891;991;1062;4751;5347;9232;9787;9928;55143;81610;81930;84722;151246	geneontology_Biological_Process	16817017;16697695;16698984;16985599;16978568;16793225;16991741;16889251;16736891;16662648;16913681;16663514;16690535;16901755
GO:0007059	chromosome segregation	http://amigo.geneontology.org/amigo/term/GO:0007059	301	15	1.91509	7.83253	7.69e-10	4.91e-07	699;891;991;1062;4751;5347;9232;9787;9928;10274;55143;81610;81930;84722;151246	geneontology_Biological_Process	16817017;16697695;16698984;16985599;16978568;16793225;16959531;16991741;16889251;16736891;16662648;16913681;16663514;16690535;16901755
GO:0007051	spindle organization	http://amigo.geneontology.org/amigo/term/GO:0007051	169	12	1.07525	11.1602	7.89e-10	4.91e-07	891;991;1062;4751;5347;6790;9793;10274;29899;79866;84722;259266	geneontology_Biological_Process	16817017;16697544;16698984;16985599;16978568;16775324;16920548;16959531;16668079;16663514;16690535;16737841
GO:0051233	spindle midzone	http://amigo.geneontology.org/amigo/term/GO:0051233	33	7	0.20996	33.3397	1.3e-09	7.4e-07	1062;5347;6790;9585;9928;55143;81930	geneontology_Cellular_Component	16817017;16697695;16978568;16920548;16736891;16707221;16662648
GO:0007052	mitotic spindle organization	http://amigo.geneontology.org/amigo/term/GO:0007052	106	10	0.674417	14.8276	1.37e-09	7.4e-07	891;991;1062;4751;5347;6790;10274;29899;79866;84722	geneontology_Biological_Process	16817017;16698984;16985599;16978568;16775324;16920548;16959531;16668079;16663514;16690535
GO:0031145	anaphase-promoting complex-dependent catabolic process	http://amigo.geneontology.org/amigo/term/GO:0031145	36	7	0.229047	30.5614	2.49e-09	1.2e-06	891;991;5347;6790;9232;11065;27338	geneontology_Biological_Process	16817017;16985599;16920548;16991741;16914315;16663514;16875763
GO:0000775	chromosome, centromeric region	http://amigo.geneontology.org/amigo/term/GO:0000775	187	12	1.18977	10.086	2.51e-09	1.2e-06	699;891;1058;1062;4751;5347;6790;9793;10274;55143;81930;151246	geneontology_Cellular_Component	16817017;16698984;16985599;16978568;16920548;16959531;16889251;16736891;16662648;16877956;16901755;16737841
GO:0044772	mitotic cell cycle phase transition	http://amigo.geneontology.org/amigo/term/GO:0044772	464	17	2.95217	5.75848	5.65e-09	2.54e-06	699;891;991;995;1062;3161;4751;5347;6790;7465;8900;9787;9793;9928;11065;27338;79866	geneontology_Biological_Process	16817017;16697695;16698984;16985599;16978568;16721835;16775324;16793225;16920548;16774053;16914315;16991859;16663514;17000439;16901755;16737841;16875763
GO:1901987	regulation of cell cycle phase transition	http://amigo.geneontology.org/amigo/term/GO:1901987	366	15	2.32865	6.44151	1.1e-08	4.67e-06	699;891;991;995;1062;3161;4751;5347;6790;7465;9787;9793;9928;11065;81610	geneontology_Biological_Process	16817017;16697695;16698984;16985599;16978568;16721835;16793225;16920548;16914315;16913681;16991859;16663514;17000439;16901755;16737841
GO:0097431	mitotic spindle pole	http://amigo.geneontology.org/amigo/term/GO:0097431	26	6	0.165423	36.2706	1.2e-08	4.85e-06	6790;9585;10274;29899;81610;259266	geneontology_Cellular_Component	16697544;16920548;16959531;16668079;16707221;16913681
GO:0098687	chromosomal region	http://amigo.geneontology.org/amigo/term/GO:0098687	321	14	2.04234	6.85489	1.61e-08	6.21e-06	699;891;1058;1062;3018;4751;5347;6790;9793;10274;55143;80119;81930;151246	geneontology_Cellular_Component	16817017;16698984;16985599;16978568;16920548;16959531;16889251;16736891;17016369;16810585;16662648;16877956;16901755;16737841
GO:0051303	establishment of chromosome localization	http://amigo.geneontology.org/amigo/term/GO:0051303	72	8	0.458095	17.4636	1.77e-08	6.51e-06	891;1062;9787;9928;55143;81610;81930;84722	geneontology_Biological_Process	16697695;16985599;16978568;16793225;16736891;16662648;16913681;16690535
GO:0050000	chromosome localization	http://amigo.geneontology.org/amigo/term/GO:0050000	73	8	0.464457	17.2244	1.98e-08	6.96e-06	891;1062;9787;9928;55143;81610;81930;84722	geneontology_Biological_Process	16697695;16985599;16978568;16793225;16736891;16662648;16913681;16690535
GO:1901990	regulation of mitotic cell cycle phase transition	http://amigo.geneontology.org/amigo/term/GO:1901990	336	14	2.13778	6.54886	2.86e-08	9.64e-06	699;891;991;995;1062;3161;4751;5347;6790;7465;9787;9793;9928;11065	geneontology_Biological_Process	16817017;16697695;16698984;16985599;16978568;16721835;16793225;16920548;16914315;16991859;16663514;17000439;16901755;16737841
GO:0000779	condensed chromosome, centromeric region	http://amigo.geneontology.org/amigo/term/GO:0000779	113	9	0.718954	12.5182	4.22e-08	1.37e-05	699;891;1058;1062;4751;5347;6790;9793;151246	geneontology_Cellular_Component	16817017;16698984;16985599;16978568;16920548;16889251;16877956;16901755;16737841
GO:0045787	positive regulation of cell cycle	http://amigo.geneontology.org/amigo/term/GO:0045787	353	14	2.24594	6.23348	5.29e-08	1.59e-05	440;891;899;995;1490;6790;8900;9585;9787;9928;11065;29899;81610;84722	geneontology_Biological_Process	16697695;16985599;16793225;16920548;16668079;16774053;16914315;16707221;16815090;17125034;16913681;17023646;17000439;16690535
GO:0010965	regulation of mitotic sister chromatid separation	http://amigo.geneontology.org/amigo/term/GO:0010965	55	7	0.349933	20.0038	5.49e-08	1.59e-05	699;891;991;1062;5347;9232;9787	geneontology_Biological_Process	16817017;16985599;16978568;16793225;16991741;16663514;16901755
GO:0051310	metaphase plate congression	http://amigo.geneontology.org/amigo/term/GO:0051310	55	7	0.349933	20.0038	5.49e-08	1.59e-05	891;1062;9928;55143;81610;81930;84722	geneontology_Biological_Process	16697695;16985599;16978568;16736891;16662648;16913681;16690535
GO:0051306	mitotic sister chromatid separation	http://amigo.geneontology.org/amigo/term/GO:0051306	58	7	0.369021	18.9691	8.01e-08	2.23e-05	699;891;991;1062;5347;9232;9787	geneontology_Biological_Process	16817017;16985599;16978568;16793225;16991741;16663514;16901755
GO:0030496	midbody	http://amigo.geneontology.org/amigo/term/GO:0030496	164	10	1.04344	9.5837	9.3e-08	2.51e-05	1062;4751;5347;6790;9585;9928;10112;55143;84722;259266	geneontology_Cellular_Component	16989636;16817017;16697695;16697544;16698984;16978568;16920548;16707221;16662648;16690535
GO:0070507	regulation of microtubule cytoskeleton organization	http://amigo.geneontology.org/amigo/term/GO:0070507	165	10	1.0498	9.52562	9.85e-08	2.57e-05	899;4751;5347;6790;10274;26586;29899;79866;81930;84722	geneontology_Biological_Process	16817017;16698984;16775324;16920548;16959531;16668079;16775014;16736891;16815090;16690535
GO:1905818	regulation of chromosome separation	http://amigo.geneontology.org/amigo/term/GO:1905818	60	7	0.381746	18.3368	1.02e-07	2.57e-05	699;891;991;1062;5347;9232;9787	geneontology_Biological_Process	16817017;16985599;16978568;16793225;16991741;16663514;16901755
GO:0000776	kinetochore	http://amigo.geneontology.org/amigo/term/GO:0000776	127	9	0.808028	11.1382	1.16e-07	2.85e-05	699;891;1058;1062;4751;5347;9793;81930;151246	geneontology_Cellular_Component	16817017;16698984;16985599;16978568;16889251;16736891;16877956;16901755;16737841
GO:0072686	mitotic spindle	http://amigo.geneontology.org/amigo/term/GO:0072686	92	8	0.585343	13.6672	1.24e-07	2.95e-05	1062;6790;9585;10274;29899;81610;81930;259266	geneontology_Cellular_Component	16697544;16978568;16920548;16959531;16668079;16736891;16707221;16913681
GO:0051983	regulation of chromosome segregation	http://amigo.geneontology.org/amigo/term/GO:0051983	96	8	0.610793	13.0977	1.73e-07	4e-05	699;891;991;1062;4751;5347;9232;9787	geneontology_Biological_Process	16817017;16698984;16985599;16978568;16793225;16991741;16663514;16901755
GO:0033047	regulation of mitotic sister chromatid segregation	http://amigo.geneontology.org/amigo/term/GO:0033047	66	7	0.41992	16.6698	1.99e-07	4.47e-05	699;891;991;1062;5347;9232;9787	geneontology_Biological_Process	16817017;16985599;16978568;16793225;16991741;16663514;16901755
GO:0000777	condensed chromosome kinetochore	http://amigo.geneontology.org/amigo/term/GO:0000777	100	8	0.636243	12.5738	2.38e-07	5.2e-05	699;891;1058;1062;4751;5347;9793;151246	geneontology_Cellular_Component	16817017;16698984;16985599;16978568;16889251;16877956;16901755;16737841
GO:0000086	G2/M transition of mitotic cell cycle	http://amigo.geneontology.org/amigo/term/GO:0000086	182	10	1.15796	8.63586	2.46e-07	5.24e-05	891;995;3161;4751;5347;6790;7465;9793;9928;79866	geneontology_Biological_Process	16817017;16697695;16698984;16985599;16721835;16775324;16920548;16991859;17000439;16737841
GO:1903046	meiotic cell cycle process	http://amigo.geneontology.org/amigo/term/GO:1903046	184	10	1.17069	8.542	2.73e-07	5.66e-05	699;991;995;5347;6790;8900;9232;81930;151246;259266	geneontology_Biological_Process	16817017;16697544;16920548;16991741;16774053;16889251;16736891;16663514;17000439;16901755
GO:0007080	mitotic metaphase plate congression	http://amigo.geneontology.org/amigo/term/GO:0007080	43	6	0.273584	21.9311	2.91e-07	5.76e-05	891;1062;9928;55143;81930;84722	geneontology_Biological_Process	16697695;16985599;16978568;16736891;16662648;16690535
GO:0000780	condensed nuclear chromosome, centromeric region	http://amigo.geneontology.org/amigo/term/GO:0000780	23	5	0.146336	34.168	2.92e-07	5.76e-05	699;891;1058;5347;6790	geneontology_Cellular_Component	16817017;16985599;16920548;16877956;16901755
GO:0032886	regulation of microtubule-based process	http://amigo.geneontology.org/amigo/term/GO:0032886	193	10	1.22795	8.14366	4.24e-07	8.17e-05	899;4751;5347;6790;10274;26586;29899;79866;81930;84722	geneontology_Biological_Process	16817017;16698984;16775324;16920548;16959531;16668079;16775014;16736891;16815090;16690535
GO:0051321	meiotic cell cycle	http://amigo.geneontology.org/amigo/term/GO:0051321	246	11	1.56516	7.02805	4.78e-07	8.89e-05	699;991;995;4751;5347;6790;8900;9232;81930;151246;259266	geneontology_Biological_Process	16817017;16697544;16698984;16920548;16991741;16774053;16889251;16736891;16663514;17000439;16901755
GO:0033045	regulation of sister chromatid segregation	http://amigo.geneontology.org/amigo/term/GO:0033045	75	7	0.477182	14.6695	4.84e-07	8.89e-05	699;891;991;1062;5347;9232;9787	geneontology_Biological_Process	16817017;16985599;16978568;16793225;16991741;16663514;16901755
GO:1904668	positive regulation of ubiquitin protein ligase activity	http://amigo.geneontology.org/amigo/term/GO:1904668	11	4	0.0699867	57.1537	4.95e-07	8.89e-05	991;5347;11065;27338	geneontology_Biological_Process	16817017;16914315;16663514;16875763
GO:0044839	cell cycle G2/M phase transition	http://amigo.geneontology.org/amigo/term/GO:0044839	200	10	1.27249	7.85864	5.89e-07	0.000104	891;995;3161;4751;5347;6790;7465;9793;9928;79866	geneontology_Biological_Process	16817017;16697695;16698984;16985599;16721835;16775324;16920548;16991859;17000439;16737841
GO:0030071	regulation of mitotic metaphase/anaphase transition	http://amigo.geneontology.org/amigo/term/GO:0030071	50	6	0.318121	18.8607	7.32e-07	0.000126	699;891;991;1062;5347;9787	geneontology_Biological_Process	16817017;16985599;16978568;16793225;16663514;16901755
GO:1902099	regulation of metaphase/anaphase transition of cell cycle	http://amigo.geneontology.org/amigo/term/GO:1902099	52	6	0.330846	18.1353	9.28e-07	0.000156	699;891;991;1062;5347;9787	geneontology_Biological_Process	16817017;16985599;16978568;16793225;16663514;16901755
GO:0005874	microtubule	http://amigo.geneontology.org/amigo/term/GO:0005874	385	13	2.44953	5.30713	1.02e-06	0.000168	1062;4751;5347;6790;9585;9793;9928;10112;26586;81930;84722;259266;283431	geneontology_Cellular_Component	16989636;16817017;16697695;16697544;16698984;16978568;16755692;16920548;16775014;16736891;16707221;16690535;16737841
GO:0007091	metaphase/anaphase transition of mitotic cell cycle	http://amigo.geneontology.org/amigo/term/GO:0007091	53	6	0.337209	17.7931	1.04e-06	0.000168	699;891;991;1062;5347;9787	geneontology_Biological_Process	16817017;16985599;16978568;16793225;16663514;16901755
GO:0000793	condensed chromosome	http://amigo.geneontology.org/amigo/term/GO:0000793	216	10	1.37428	7.27652	1.19e-06	0.000185	699;891;1058;1062;4751;5347;6790;9793;10274;151246	geneontology_Cellular_Component	16817017;16698984;16985599;16978568;16920548;16959531;16889251;16877956;16901755;16737841
GO:0140013	meiotic nuclear division	http://amigo.geneontology.org/amigo/term/GO:0140013	167	9	1.06253	8.47039	1.19e-06	0.000185	699;991;5347;6790;8900;9232;81930;151246;259266	geneontology_Biological_Process	16817017;16697544;16920548;16991741;16774053;16889251;16736891;16663514;16901755
GO:0044784	metaphase/anaphase transition of cell cycle	http://amigo.geneontology.org/amigo/term/GO:0044784	55	6	0.349933	17.1461	1.3e-06	0.000198	699;891;991;1062;5347;9787	geneontology_Biological_Process	16817017;16985599;16978568;16793225;16663514;16901755
GO:0051304	chromosome separation	http://amigo.geneontology.org/amigo/term/GO:0051304	88	7	0.559894	12.5024	1.45e-06	0.000217	699;891;991;1062;5347;9232;9787	geneontology_Biological_Process	16817017;16985599;16978568;16793225;16991741;16663514;16901755
GO:0000778	condensed nuclear chromosome kinetochore	http://amigo.geneontology.org/amigo/term/GO:0000778	14	4	0.089074	44.9065	1.48e-06	0.000217	699;891;1058;5347	geneontology_Cellular_Component	16817017;16985599;16877956;16901755
GO:0051493	regulation of cytoskeleton organization	http://amigo.geneontology.org/amigo/term/GO:0051493	473	14	3.00943	4.65205	1.81e-06	0.000262	899;1490;4751;5347;5921;6790;10178;10274;26586;29899;79866;81930;84722;93663	geneontology_Biological_Process	16817017;16698984;16775324;16920548;16959531;16668079;17023484;16987008;16775014;16736891;16815090;17023646;16690535;17113928
GO:0008017	microtubule binding	http://amigo.geneontology.org/amigo/term/GO:0008017	229	10	1.457	6.86344	2.02e-06	0.000286	1062;5347;9585;9793;9928;10112;81610;81930;84722;283431	geneontology_Molecular_Function	16989636;16817017;16697695;16978568;16755692;16736891;16707221;16913681;16690535;16737841
GO:0005813	centrosome	http://amigo.geneontology.org/amigo/term/GO:0005813	481	14	3.06033	4.57467	2.2e-06	0.000307	891;899;991;3161;4751;5347;6790;9585;9787;9793;26586;29899;129880;259266	geneontology_Cellular_Component	16817017;16697544;16698984;16985599;16793225;16920548;16668079;16775014;16707221;16815090;16991859;16663514;16887259;16737841
GO:0060236	regulation of mitotic spindle organization	http://amigo.geneontology.org/amigo/term/GO:0060236	35	5	0.222685	22.4532	2.65e-06	0.000364	5347;10274;29899;79866;84722	geneontology_Biological_Process	16817017;16775324;16959531;16668079;16690535
GO:0010389	regulation of G2/M transition of mitotic cell cycle	http://amigo.geneontology.org/amigo/term/GO:0010389	141	8	0.897102	8.9176	3.26e-06	0.00044	891;995;3161;4751;5347;6790;9793;9928	geneontology_Biological_Process	16817017;16697695;16698984;16985599;16920548;16991859;17000439;16737841
GO:2000816	negative regulation of mitotic sister chromatid separation	http://amigo.geneontology.org/amigo/term/GO:2000816	38	5	0.241772	20.6806	4.04e-06	0.000536	699;891;991;5347;9232	geneontology_Biological_Process	16817017;16985599;16991741;16663514;16901755
GO:0007163	establishment or maintenance of cell polarity	http://amigo.geneontology.org/amigo/term/GO:0007163	196	9	1.24704	7.21712	4.46e-06	0.000581	1058;4983;7465;9585;9793;10252;29899;55612;57381	geneontology_Biological_Process	17111738;16721835;16668079;16707221;16917061;16877956;16785127;16737841;16970435
GO:1905819	negative regulation of chromosome separation	http://amigo.geneontology.org/amigo/term/GO:1905819	39	5	0.248135	20.1503	4.61e-06	0.000583	699;891;991;5347;9232	geneontology_Biological_Process	16817017;16985599;16991741;16663514;16901755
GO:0090224	regulation of spindle organization	http://amigo.geneontology.org/amigo/term/GO:0090224	39	5	0.248135	20.1503	4.61e-06	0.000583	5347;10274;29899;79866;84722	geneontology_Biological_Process	16817017;16775324;16959531;16668079;16690535
GO:0090068	positive regulation of cell cycle process	http://amigo.geneontology.org/amigo/term/GO:0090068	252	10	1.60333	6.23701	4.73e-06	0.000589	891;995;1490;6790;9585;9787;9928;11065;29899;81610	geneontology_Biological_Process	16697695;16985599;16793225;16920548;16668079;16914315;16707221;16913681;17023646;17000439
GO:0000910	cytokinesis	http://amigo.geneontology.org/amigo/term/GO:0000910	150	8	0.954364	8.38255	5.17e-06	0.000633	1058;5347;5921;6790;9585;9928;10112;26586	geneontology_Biological_Process	16989636;16817017;16697695;16920548;16987008;16775014;16707221;16877956
GO:0033048	negative regulation of mitotic sister chromatid segregation	http://amigo.geneontology.org/amigo/term/GO:0033048	41	5	0.26086	19.1674	5.94e-06	0.000717	699;891;991;5347;9232	geneontology_Biological_Process	16817017;16985599;16991741;16663514;16901755
GO:0051225	spindle assembly	http://amigo.geneontology.org/amigo/term/GO:0051225	110	7	0.699867	10.0019	6.46e-06	0.000769	991;4751;5347;6790;10274;29899;259266	geneontology_Biological_Process	16817017;16697544;16698984;16920548;16959531;16668079;16663514
GO:1904666	regulation of ubiquitin protein ligase activity	http://amigo.geneontology.org/amigo/term/GO:1904666	20	4	0.127249	31.4345	6.95e-06	0.000814	991;5347;11065;27338	geneontology_Biological_Process	16817017;16914315;16663514;16875763
GO:1902749	regulation of cell cycle G2/M phase transition	http://amigo.geneontology.org/amigo/term/GO:1902749	157	8	0.998901	8.0088	7.24e-06	0.000836	891;995;3161;4751;5347;6790;9793;9928	geneontology_Biological_Process	16817017;16697695;16698984;16985599;16920548;16991859;17000439;16737841
GO:0033046	negative regulation of sister chromatid segregation	http://amigo.geneontology.org/amigo/term/GO:0033046	43	5	0.273584	18.2759	7.55e-06	0.000856	699;891;991;5347;9232	geneontology_Biological_Process	16817017;16985599;16991741;16663514;16901755
GO:0010948	negative regulation of cell cycle process	http://amigo.geneontology.org/amigo/term/GO:0010948	266	10	1.69241	5.90875	7.62e-06	0.000856	699;891;899;991;995;4751;5347;6790;7465;9232	geneontology_Biological_Process	16817017;16698984;16985599;16721835;16920548;16991741;16815090;16663514;17000439;16901755
GO:0051985	negative regulation of chromosome segregation	http://amigo.geneontology.org/amigo/term/GO:0051985	44	5	0.279947	17.8605	8.48e-06	0.000939	699;891;991;5347;9232	geneontology_Biological_Process	16817017;16985599;16991741;16663514;16901755
GO:0051656	establishment of organelle localization	http://amigo.geneontology.org/amigo/term/GO:0051656	472	13	3.00307	4.32891	9.45e-06	0.00103303	891;1058;1062;9787;9928;10252;22871;29899;55143;81610;81930;84722;129880	geneontology_Biological_Process	16697695;16985599;16948063;16978568;16793225;16668079;16736891;16662648;16913681;16887259;16877956;16690535;16970435
GO:0000281	mitotic cytokinesis	http://amigo.geneontology.org/amigo/term/GO:0000281	78	6	0.496269	12.0902	1.02e-05	0.00110392	1058;5347;5921;9585;10112;26586	geneontology_Biological_Process	16989636;16817017;16987008;16775014;16707221;16877956
GO:0045839	negative regulation of mitotic nuclear division	http://amigo.geneontology.org/amigo/term/GO:0045839	51	5	0.324484	15.4091	1.77e-05	0.00185933	699;891;991;5347;9232	geneontology_Biological_Process	16817017;16985599;16991741;16663514;16901755
GO:0005876	spindle microtubule	http://amigo.geneontology.org/amigo/term/GO:0005876	51	5	0.324484	15.4091	1.77e-05	0.00185933	1062;5347;6790;81930;84722	geneontology_Cellular_Component	16817017;16978568;16920548;16736891;16690535
GO:0000079	regulation of cyclin-dependent protein serine/threonine kinase activity	http://amigo.geneontology.org/amigo/term/GO:0000079	86	6	0.547169	10.9655	1.8e-05	0.00186458	891;899;995;5347;8900;84722	geneontology_Biological_Process	16817017;16985599;16774053;16815090;17000439;16690535
GO:0030010	establishment of cell polarity	http://amigo.geneontology.org/amigo/term/GO:0030010	129	7	0.820753	8.52875	1.84e-05	0.00188279	1058;4983;7465;9585;10252;29899;55612	geneontology_Biological_Process	17111738;16721835;16668079;16707221;16917061;16877956;16970435
GO:0010498	proteasomal protein catabolic process	http://amigo.geneontology.org/amigo/term/GO:0010498	430	12	2.73584	4.38622	1.87e-05	0.00189222	891;899;991;2272;4983;5347;6790;9232;9928;11065;27338;285671	geneontology_Biological_Process	16817017;16697695;16985599;17111738;16920548;16991741;16914315;16955645;16985217;16815090;16663514;16875763
GO:0005871	kinesin complex	http://amigo.geneontology.org/amigo/term/GO:0005871	52	5	0.330846	15.1128	1.95e-05	0.0019457	1062;9585;9928;10112;81930	geneontology_Cellular_Component	16989636;16697695;16978568;16736891;16707221
GO:1904029	regulation of cyclin-dependent protein kinase activity	http://amigo.geneontology.org/amigo/term/GO:1904029	90	6	0.572618	10.4782	2.33e-05	0.00230093	891;899;995;5347;8900;84722	geneontology_Biological_Process	16817017;16985599;16774053;16815090;17000439;16690535
GO:0061640	cytoskeleton-dependent cytokinesis	http://amigo.geneontology.org/amigo/term/GO:0061640	91	6	0.578981	10.363	2.48e-05	0.00238622	1058;5347;5921;9585;10112;26586	geneontology_Biological_Process	16989636;16817017;16987008;16775014;16707221;16877956
GO:0015631	tubulin binding	http://amigo.geneontology.org/amigo/term/GO:0015631	305	10	1.94054	5.1532	2.49e-05	0.00238622	1062;5347;9585;9793;9928;10112;81610;81930;84722;283431	geneontology_Molecular_Function	16989636;16817017;16697695;16978568;16755692;16736891;16707221;16913681;16690535;16737841
GO:0043161	proteasome-mediated ubiquitin-dependent protein catabolic process	http://amigo.geneontology.org/amigo/term/GO:0043161	372	11	2.36682	4.64758	2.51e-05	0.00238622	891;899;991;2272;5347;6790;9232;9928;11065;27338;285671	geneontology_Biological_Process	16817017;16697695;16985599;16920548;16991741;16914315;16955645;16985217;16815090;16663514;16875763
GO:0045931	positive regulation of mitotic cell cycle	http://amigo.geneontology.org/amigo/term/GO:0045931	137	7	0.871652	8.03072	2.71e-05	0.0025529	440;891;995;6790;9585;9787;11065	geneontology_Biological_Process	16985599;16793225;16920548;16914315;16707221;17125034;17000439
GO:0051443	positive regulation of ubiquitin-protein transferase activity	http://amigo.geneontology.org/amigo/term/GO:0051443	29	4	0.18451	21.679	3.26e-05	0.00299495	991;5347;11065;27338	geneontology_Biological_Process	16817017;16914315;16663514;16875763
GO:0008527	taste receptor activity	http://amigo.geneontology.org/amigo/term/GO:0008527	29	4	0.18451	21.679	3.26e-05	0.00299495	50839;50840;259290;338557	geneontology_Molecular_Function	16761495;16761502;16761518;16707567
GO:0005875	microtubule associated complex	http://amigo.geneontology.org/amigo/term/GO:0005875	143	7	0.909827	7.69377	3.58e-05	0.00324922	1062;6790;9585;9928;10112;55143;81930	geneontology_Cellular_Component	16989636;16697695;16978568;16920548;16736891;16707221;16662648
GO:0051784	negative regulation of nuclear division	http://amigo.geneontology.org/amigo/term/GO:0051784	59	5	0.375383	13.3197	3.62e-05	0.00325604	699;891;991;5347;9232	geneontology_Biological_Process	16817017;16985599;16991741;16663514;16901755
GO:0000940	condensed chromosome outer kinetochore	http://amigo.geneontology.org/amigo/term/GO:0000940	11	3	0.0699867	42.8653	3.98e-05	0.00352397	699;891;5347	geneontology_Cellular_Component	16817017;16985599;16901755
GO:0000794	condensed nuclear chromosome	http://amigo.geneontology.org/amigo/term/GO:0000794	99	6	0.62988	9.52562	4.01e-05	0.00352397	699;891;1058;4751;5347;6790	geneontology_Cellular_Component	16817017;16698984;16985599;16920548;16877956;16901755
GO:0051302	regulation of cell division	http://amigo.geneontology.org/amigo/term/GO:0051302	151	7	0.960726	7.28615	5.06e-05	0.00440135	2250;5347;6790;9585;9928;10112;259266	geneontology_Biological_Process	16989636;16817017;16697695;16697544;16920548;16707221;16968331
GO:0000786	nucleosome	http://amigo.geneontology.org/amigo/term/GO:0000786	65	5	0.413558	12.0902	5.8e-05	0.00499005	1058;3018;8329;8340;8342	geneontology_Cellular_Component	17016369;17016486;16877956;17005858;17005865
GO:0007094	mitotic spindle assembly checkpoint	http://amigo.geneontology.org/amigo/term/GO:0007094	34	4	0.216323	18.4909	6.21e-05	0.00512418	699;891;991;5347	geneontology_Biological_Process	16817017;16985599;16663514;16901755
GO:0031577	spindle checkpoint	http://amigo.geneontology.org/amigo/term/GO:0031577	34	4	0.216323	18.4909	6.21e-05	0.00512418	699;891;991;5347	geneontology_Biological_Process	16817017;16985599;16663514;16901755
GO:0071173	spindle assembly checkpoint	http://amigo.geneontology.org/amigo/term/GO:0071173	34	4	0.216323	18.4909	6.21e-05	0.00512418	699;891;991;5347	geneontology_Biological_Process	16817017;16985599;16663514;16901755
GO:0071174	mitotic spindle checkpoint	http://amigo.geneontology.org/amigo/term/GO:0071174	34	4	0.216323	18.4909	6.21e-05	0.00512418	699;891;991;5347	geneontology_Biological_Process	16817017;16985599;16663514;16901755
GO:1990023	mitotic spindle midzone	http://amigo.geneontology.org/amigo/term/GO:1990023	13	3	0.0827116	36.2706	6.84e-05	0.0055891	1062;9585;81930	geneontology_Cellular_Component	16978568;16736891;16707221
GO:0007093	mitotic cell cycle checkpoint	http://amigo.geneontology.org/amigo/term/GO:0007093	160	7	1.01799	6.87631	7.3e-05	0.00590537	699;891;991;995;5347;6790;7465	geneontology_Biological_Process	16817017;16985599;16721835;16920548;16663514;17000439;16901755
GO:0045841	negative regulation of mitotic metaphase/anaphase transition	http://amigo.geneontology.org/amigo/term/GO:0045841	36	4	0.229047	17.4636	7.81e-05	0.00625371	699;891;991;5347	geneontology_Biological_Process	16817017;16985599;16663514;16901755
GO:1901991	negative regulation of mitotic cell cycle phase transition	http://amigo.geneontology.org/amigo/term/GO:1901991	162	7	1.03071	6.79141	7.9e-05	0.00626068	699;891;991;995;5347;6790;7465	geneontology_Biological_Process	16817017;16985599;16721835;16920548;16663514;17000439;16901755
GO:1902100	negative regulation of metaphase/anaphase transition of cell cycle	http://amigo.geneontology.org/amigo/term/GO:1902100	37	4	0.23541	16.9916	8.71e-05	0.00684203	699;891;991;5347	geneontology_Biological_Process	16817017;16985599;16663514;16901755
GO:0044815	DNA packaging complex	http://amigo.geneontology.org/amigo/term/GO:0044815	73	5	0.464457	10.7653	0.000101	0.00787745	1058;3018;8329;8340;8342	geneontology_Cellular_Component	17016369;17016486;16877956;17005858;17005865
GO:0032465	regulation of cytokinesis	http://amigo.geneontology.org/amigo/term/GO:0032465	76	5	0.483544	10.3403	0.000123	0.0094529	5347;6790;9585;9928;10112	geneontology_Biological_Process	16989636;16817017;16697695;16920548;16707221
GO:0007019	microtubule depolymerization	http://amigo.geneontology.org/amigo/term/GO:0007019	41	4	0.26086	15.3339	0.000131	0.0099968	9793;9928;26586;81930	geneontology_Biological_Process	16697695;16775014;16736891;16737841
GO:0051653	spindle localization	http://amigo.geneontology.org/amigo/term/GO:0051653	42	4	0.267222	14.9688	0.000144	0.0108925	1058;10252;29899;259266	geneontology_Biological_Process	16697544;16668079;16877956;16970435
GO:1901988	negative regulation of cell cycle phase transition	http://amigo.geneontology.org/amigo/term/GO:1901988	179	7	1.13887	6.14642	0.000147	0.011023	699;891;991;995;5347;6790;7465	geneontology_Biological_Process	16817017;16985599;16721835;16920548;16663514;17000439;16901755
GO:0003777	microtubule motor activity	http://amigo.geneontology.org/amigo/term/GO:0003777	81	5	0.515357	9.70202	0.000166	0.0123144	1062;9585;9928;10112;81930	geneontology_Molecular_Function	16989636;16697695;16978568;16736891;16707221
GO:1901989	positive regulation of cell cycle phase transition	http://amigo.geneontology.org/amigo/term/GO:1901989	82	5	0.521719	9.5837	0.000176	0.0129296	891;995;9787;11065;81610	geneontology_Biological_Process	16985599;16793225;16914315;16913681;17000439
GO:0033044	regulation of chromosome organization	http://amigo.geneontology.org/amigo/term/GO:0033044	314	9	1.9978	4.50495	0.000179	0.0130154	699;891;991;1062;4751;5347;9232;9787;80119	geneontology_Biological_Process	16817017;16698984;16985599;16978568;16793225;16991741;16810585;16663514;16901755
GO:0045930	negative regulation of mitotic cell cycle	http://amigo.geneontology.org/amigo/term/GO:0045930	247	8	1.57152	5.09061	0.000181	0.0130826	699;891;991;995;5347;6790;7465;9232	geneontology_Biological_Process	16817017;16985599;16721835;16920548;16991741;16663514;17000439;16901755
GO:0050912	detection of chemical stimulus involved in sensory perception of taste	http://amigo.geneontology.org/amigo/term/GO:0050912	45	4	0.286309	13.9709	0.000189	0.0135297	50839;50840;259290;338557	geneontology_Biological_Process	16761495;16761502;16761518;16707567
GO:0051056	regulation of small GTPase mediated signal transduction	http://amigo.geneontology.org/amigo/term/GO:0051056	318	9	2.02325	4.44828	0.000196	0.0139269	4983;5921;9824;9928;10252;55789;57381;57636;93663	geneontology_Biological_Process	16697695;17111738;17023484;16987008;17121496;16798919;16996545;16785127;16970435
GO:2001251	negative regulation of chromosome organization	http://amigo.geneontology.org/amigo/term/GO:2001251	134	6	0.852565	7.03758	0.000215	0.015089	699;891;991;5347;9232;80119	geneontology_Biological_Process	16817017;16985599;16991741;16810585;16663514;16901755
GO:0071900	regulation of protein serine/threonine kinase activity	http://amigo.geneontology.org/amigo/term/GO:0071900	477	11	3.03488	3.62453	0.000229	0.0159863	891;899;995;1846;5347;5795;6653;8900;10178;10252;84722	geneontology_Biological_Process	16817017;16985599;16774053;16815090;17000439;16690535;16732584;16724633;16970435;17075973;17113928
GO:0007062	sister chromatid cohesion	http://amigo.geneontology.org/amigo/term/GO:0007062	49	4	0.311759	12.8304	0.000264	0.0182225	699;991;5347;151246	geneontology_Biological_Process	16817017;16889251;16663514;16901755
GO:0051438	regulation of ubiquitin-protein transferase activity	http://amigo.geneontology.org/amigo/term/GO:0051438	50	4	0.318121	12.5738	0.000285	0.0195436	991;5347;11065;27338	geneontology_Biological_Process	16817017;16914315;16663514;16875763
GO:0005680	anaphase-promoting complex	http://amigo.geneontology.org/amigo/term/GO:0005680	21	3	0.133611	22.4532	0.000307	0.0208357	991;11065;27338	geneontology_Cellular_Component	16914315;16663514;16875763
GO:1902806	regulation of cell cycle G1/S phase transition	http://amigo.geneontology.org/amigo/term/GO:1902806	144	6	0.916189	6.54886	0.000316	0.021327	891;995;6790;7465;9928;81610	geneontology_Biological_Process	16697695;16985599;16721835;16920548;16913681;17000439
GO:0000075	cell cycle checkpoint	http://amigo.geneontology.org/amigo/term/GO:0000075	211	7	1.34247	5.21426	0.000402	0.0265947	699;891;991;995;5347;6790;7465	geneontology_Biological_Process	16817017;16985599;16721835;16920548;16663514;17000439;16901755
GO:0000132	establishment of mitotic spindle orientation	http://amigo.geneontology.org/amigo/term/GO:0000132	23	3	0.146336	20.5008	0.000404	0.0265947	1058;10252;29899	geneontology_Biological_Process	16668079;16877956;16970435
GO:0033038	bitter taste receptor activity	http://amigo.geneontology.org/amigo/term/GO:0033038	23	3	0.146336	20.5008	0.000404	0.0265947	50839;50840;259290	geneontology_Molecular_Function	16761495;16761502;16761518
GO:0010639	negative regulation of organelle organization	http://amigo.geneontology.org/amigo/term/GO:0010639	354	9	2.2523	3.99592	0.000432	0.028147	699;891;899;991;4751;5347;9232;26586;80119	geneontology_Biological_Process	16817017;16698984;16985599;16991741;16775014;16810585;16815090;16663514;16901755
GO:0051642	centrosome localization	http://amigo.geneontology.org/amigo/term/GO:0051642	24	3	0.152698	19.6466	0.00046	0.0297695	6790;29899;259266	geneontology_Biological_Process	16697544;16920548;16668079
GO:0006334	nucleosome assembly	http://amigo.geneontology.org/amigo/term/GO:0006334	102	5	0.648968	7.70455	0.000485	0.0311596	1058;3018;4675;8340;8342	geneontology_Biological_Process	17016369;17016486;16877956;17005865;17112560
GO:0090307	mitotic spindle assembly	http://amigo.geneontology.org/amigo/term/GO:0090307	58	4	0.369021	10.8395	0.000505	0.0321723	991;4751;5347;10274	geneontology_Biological_Process	16817017;16698984;16959531;16663514
GO:0061842	microtubule organizing center localization	http://amigo.geneontology.org/amigo/term/GO:0061842	25	3	0.159061	18.8607	0.00052	0.0326287	6790;29899;259266	geneontology_Biological_Process	16697544;16920548;16668079
GO:0008574	ATP-dependent microtubule motor activity, plus-end-directed	http://amigo.geneontology.org/amigo/term/GO:0008574	25	3	0.159061	18.8607	0.00052	0.0326287	9585;9928;81930	geneontology_Molecular_Function	16697695;16736891;16707221
GO:0006323	DNA packaging	http://amigo.geneontology.org/amigo/term/GO:0006323	159	6	1.01163	5.93105	0.000536	0.0333727	891;1058;3018;4675;8340;8342	geneontology_Biological_Process	16985599;17016369;17016486;16877956;17005865;17112560
GO:0030695	GTPase regulator activity	http://amigo.geneontology.org/amigo/term/GO:0030695	291	8	1.85147	4.3209	0.000544	0.0335661	4983;5921;9824;29899;55635;55789;57636;93663	geneontology_Molecular_Function	16688386;17111738;16668079;17023484;16987008;17121496;16798919;16996545
GO:0031109	microtubule polymerization or depolymerization	http://amigo.geneontology.org/amigo/term/GO:0031109	105	5	0.668055	7.48442	0.000554	0.0337105	9793;9928;26586;81930;84722	geneontology_Biological_Process	16697695;16775014;16736891;16690535;16737841
GO:0031398	positive regulation of protein ubiquitination	http://amigo.geneontology.org/amigo/term/GO:0031398	105	5	0.668055	7.48442	0.000554	0.0337105	991;5347;11065;27338;285671	geneontology_Biological_Process	16817017;16914315;16985217;16663514;16875763
GO:0090169	regulation of spindle assembly	http://amigo.geneontology.org/amigo/term/GO:0090169	26	3	0.165423	18.1353	0.000586	0.0353444	5347;10274;29899	geneontology_Biological_Process	16817017;16959531;16668079
GO:0040001	establishment of mitotic spindle localization	http://amigo.geneontology.org/amigo/term/GO:0040001	27	3	0.171786	17.4636	0.000656	0.0392859	1058;10252;29899	geneontology_Biological_Process	16668079;16877956;16970435
GO:0071103	DNA conformation change	http://amigo.geneontology.org/amigo/term/GO:0071103	230	7	1.46336	4.78352	0.000671	0.0399025	891;1058;3018;4675;8340;8342;80119	geneontology_Biological_Process	16985599;17016369;16810585;17016486;16877956;17005865;17112560
GO:0050909	sensory perception of taste	http://amigo.geneontology.org/amigo/term/GO:0050909	63	4	0.400833	9.97922	0.000692	0.0408643	50839;50840;259290;338557	geneontology_Biological_Process	16761495;16761502;16761518;16707567
GO:0007098	centrosome cycle	http://amigo.geneontology.org/amigo/term/GO:0007098	113	5	0.718954	6.95455	0.000774	0.0453685	899;4751;5347;6790;9793	geneontology_Biological_Process	16817017;16698984;16920548;16815090;16737841
GO:0044843	cell cycle G1/S phase transition	http://amigo.geneontology.org/amigo/term/GO:0044843	236	7	1.50153	4.6619	0.000781	0.0454307	891;995;6790;7465;8900;9928;81610	geneontology_Biological_Process	16697695;16985599;16721835;16920548;16774053;16913681;17000439
GO:0061982	meiosis I cell cycle process	http://amigo.geneontology.org/amigo/term/GO:0061982	114	5	0.725317	6.89354	0.000806	0.0465377	995;5347;6790;8900;9232	geneontology_Biological_Process	16817017;16920548;16991741;16774053;17000439
GO:0051294	establishment of spindle orientation	http://amigo.geneontology.org/amigo/term/GO:0051294	29	3	0.18451	16.2592	0.000812	0.0465563	1058;10252;29899	geneontology_Biological_Process	16668079;16877956;16970435

## Sheet: Table S38.GEO2R_WG_down
Supplementary Table S38. List of GO terms identified by WebGestalt’s ORA using downregulated genes detected by GEO2R - GSE113427
geneSet	description	link	size	overlap	expect	enrichmentRatio	pValue	FDR	overlapId	database	userId
GO:0005819	spindle	http://amigo.geneontology.org/amigo/term/GO:0005819	313	15	1.21297	12.3664	7.79821e-13	6.30641e-09	891;1062;4751;5347;6790;9585;9787;9928;10112;10274;26586;29899;55143;81610;259266	geneontology_Cellular_Component	16989636;16817017;16697695;16985599;16959531;16698984;16697544;16793225;16978568;16920548;16913681;16775014;16707221;16662648;16668079
GO:0000922	spindle pole	http://amigo.geneontology.org/amigo/term/GO:0000922	142	11	0.550292	19.9894	6.72751e-12	2.72027e-08	891;4751;5347;6790;9585;9787;10274;26586;29899;81610;259266	geneontology_Cellular_Component	16817017;16985599;16959531;16698984;16697544;16793225;16920548;16913681;16775014;16707221;16668079
GO:0140014	mitotic nuclear division	http://amigo.geneontology.org/amigo/term/GO:0140014	272	13	1.05408	12.333	3.2331e-11	6.93348e-08	891;1062;4751;5347;6790;8900;9232;9585;9787;9928;10274;55143;79866	geneontology_Biological_Process	16817017;16697695;16985599;16959531;16698984;16793225;16775324;16978568;16920548;16774053;16991741;16707221;16662648
GO:0000280	nuclear division	http://amigo.geneontology.org/amigo/term/GO:0000280	408	15	1.58112	9.48694	3.42945e-11	6.93348e-08	891;1062;4751;5347;6790;8900;9232;9585;9787;9928;10274;55143;79866;151246;259266	geneontology_Biological_Process	16817017;16697695;16985599;16959531;16698984;16697544;16793225;16775324;16978568;16920548;16774053;16991741;16707221;16662648;16889251
GO:0007088	regulation of mitotic nuclear division	http://amigo.geneontology.org/amigo/term/GO:0007088	171	11	0.662676	16.5994	5.1036e-11	8.25456e-08	891;1062;4751;5347;6790;8900;9232;9585;9787;10274;79866	geneontology_Biological_Process	16817017;16985599;16959531;16698984;16793225;16775324;16978568;16920548;16774053;16991741;16707221
GO:0048285	organelle fission	http://amigo.geneontology.org/amigo/term/GO:0048285	444	15	1.72063	8.71773	1.12298e-10	1.51358e-07	891;1062;4751;5347;6790;8900;9232;9585;9787;9928;10274;55143;79866;151246;259266	geneontology_Biological_Process	16817017;16697695;16985599;16959531;16698984;16697544;16793225;16775324;16978568;16920548;16774053;16991741;16707221;16662648;16889251
GO:0051783	regulation of nuclear division	http://amigo.geneontology.org/amigo/term/GO:0051783	195	11	0.755683	14.5564	2.09894e-10	2.42487e-07	891;1062;4751;5347;6790;8900;9232;9585;9787;10274;79866	geneontology_Biological_Process	16817017;16985599;16959531;16698984;16793225;16775324;16978568;16920548;16774053;16991741;16707221
GO:0097431	mitotic spindle pole	http://amigo.geneontology.org/amigo/term/GO:0097431	26	6	0.100758	59.5488	5.83512e-10	5.89858e-07	6790;9585;10274;29899;81610;259266	geneontology_Cellular_Component	16959531;16697544;16920548;16913681;16707221;16668079
GO:0051233	spindle midzone	http://amigo.geneontology.org/amigo/term/GO:0051233	33	6	0.127885	46.9172	2.74821e-09	2.46942e-06	1062;5347;6790;9585;9928;55143	geneontology_Cellular_Component	16817017;16697695;16978568;16920548;16707221;16662648
GO:0007052	mitotic spindle organization	http://amigo.geneontology.org/amigo/term/GO:0007052	106	8	0.410781	19.4751	7.38632e-09	5.97332e-06	891;1062;4751;5347;6790;10274;29899;79866	geneontology_Biological_Process	16817017;16985599;16959531;16698984;16775324;16978568;16920548;16668079
GO:0030496	midbody	http://amigo.geneontology.org/amigo/term/GO:0030496	164	9	0.635549	14.161	1.33221e-08	9.79416e-06	1062;4751;5347;6790;9585;9928;10112;55143;259266	geneontology_Cellular_Component	16989636;16817017;16697695;16698984;16697544;16978568;16920548;16707221;16662648
GO:0007051	spindle organization	http://amigo.geneontology.org/amigo/term/GO:0007051	169	9	0.654925	13.742	1.73096e-08	1.16652e-05	891;1062;4751;5347;6790;10274;29899;79866;259266	geneontology_Biological_Process	16817017;16985599;16959531;16698984;16697544;16775324;16978568;16920548;16668079
GO:0007059	chromosome segregation	http://amigo.geneontology.org/amigo/term/GO:0007059	301	11	1.16646	9.43021	2.00591e-08	1.24783e-05	891;1062;4751;5347;9232;9787;9928;10274;55143;81610;151246	geneontology_Biological_Process	16817017;16697695;16985599;16959531;16698984;16793225;16978568;16991741;16913681;16662648;16889251
GO:0000819	sister chromatid segregation	http://amigo.geneontology.org/amigo/term/GO:0000819	175	9	0.678177	13.2709	2.34434e-08	1.29041e-05	891;1062;4751;5347;9232;9787;9928;55143;151246	geneontology_Biological_Process	16817017;16697695;16985599;16698984;16793225;16978568;16991741;16662648;16889251
GO:0033038	bitter taste receptor activity	http://amigo.geneontology.org/amigo/term/GO:0033038	23	5	0.0891318	56.0967	2.39349e-08	1.29041e-05	50838;50839;50840;259290;259296	geneontology_Molecular_Function	16761518;16761502;16761498;16761495;16761507
GO:1902850	microtubule cytoskeleton organization involved in mitosis	http://amigo.geneontology.org/amigo/term/GO:1902850	127	8	0.492163	16.2548	3.07954e-08	1.55651e-05	891;1062;4751;5347;6790;10274;29899;79866	geneontology_Biological_Process	16817017;16985599;16959531;16698984;16775324;16978568;16920548;16668079
GO:0098813	nuclear chromosome segregation	http://amigo.geneontology.org/amigo/term/GO:0098813	247	10	0.957198	10.4472	3.58564e-08	1.70571e-05	891;1062;4751;5347;9232;9787;9928;55143;81610;151246	geneontology_Biological_Process	16817017;16697695;16985599;16698984;16793225;16978568;16991741;16913681;16662648;16889251
GO:0072686	mitotic spindle	http://amigo.geneontology.org/amigo/term/GO:0072686	92	7	0.356527	19.6338	6.42868e-08	2.88826e-05	1062;6790;9585;10274;29899;81610;259266	geneontology_Cellular_Component	16959531;16697544;16978568;16920548;16913681;16707221;16668079
GO:0008527	taste receptor activity	http://amigo.geneontology.org/amigo/term/GO:0008527	29	5	0.112384	44.4905	8.29689e-08	3.53142e-05	50838;50839;50840;259290;259296	geneontology_Molecular_Function	16761518;16761502;16761498;16761495;16761507
GO:0000070	mitotic sister chromatid segregation	http://amigo.geneontology.org/amigo/term/GO:0000070	148	8	0.573544	13.9484	1.01505e-07	4.10437e-05	891;1062;4751;5347;9232;9787;9928;55143	geneontology_Biological_Process	16817017;16697695;16985599;16698984;16793225;16978568;16991741;16662648
GO:0000910	cytokinesis	http://amigo.geneontology.org/amigo/term/GO:0000910	150	8	0.581294	13.7624	1.1262e-07	4.33693e-05	5347;5921;6790;9585;9928;10112;26586;50838	geneontology_Biological_Process	16989636;16817017;16697695;16761498;16920548;16987008;16775014;16707221
GO:0051303	establishment of chromosome localization	http://amigo.geneontology.org/amigo/term/GO:0051303	72	6	0.279021	21.5037	3.44496e-07	0.000126633	891;1062;9787;9928;55143;81610	geneontology_Biological_Process	16697695;16985599;16793225;16978568;16913681;16662648
GO:0050000	chromosome localization	http://amigo.geneontology.org/amigo/term/GO:0050000	73	6	0.282897	21.2092	3.74211e-07	0.00013155	891;1062;9787;9928;55143;81610	geneontology_Biological_Process	16697695;16985599;16793225;16978568;16913681;16662648
GO:0001580	detection of chemical stimulus involved in sensory perception of bitter taste	http://amigo.geneontology.org/amigo/term/GO:0001580	39	5	0.151137	33.0827	3.90404e-07	0.00013155	50838;50839;50840;259290;259296	geneontology_Biological_Process	16761518;16761502;16761498;16761495;16761507
GO:0032465	regulation of cytokinesis	http://amigo.geneontology.org/amigo/term/GO:0032465	76	6	0.294523	20.372	4.76238e-07	0.000154053	5347;6790;9585;9928;10112;50838	geneontology_Biological_Process	16989636;16817017;16697695;16761498;16920548;16707221
GO:0000775	chromosome, centromeric region	http://amigo.geneontology.org/amigo/term/GO:0000775	187	8	0.72468	11.0393	6.09849e-07	0.000189686	891;1062;4751;5347;6790;10274;55143;151246	geneontology_Cellular_Component	16817017;16985599;16959531;16698984;16978568;16920548;16662648;16889251
GO:0050913	sensory perception of bitter taste	http://amigo.geneontology.org/amigo/term/GO:0050913	43	5	0.166638	30.0052	6.44951e-07	0.000193175	50838;50839;50840;259290;259296	geneontology_Biological_Process	16761518;16761502;16761498;16761495;16761507
GO:0050912	detection of chemical stimulus involved in sensory perception of taste	http://amigo.geneontology.org/amigo/term/GO:0050912	45	5	0.174388	28.6716	8.13712e-07	0.000235017	50838;50839;50840;259290;259296	geneontology_Biological_Process	16761518;16761502;16761498;16761495;16761507
GO:0051302	regulation of cell division	http://amigo.geneontology.org/amigo/term/GO:0051302	151	7	0.58517	11.9623	1.89124e-06	0.000512411	5347;6790;9585;9928;10112;50838;259266	geneontology_Biological_Process	16989636;16817017;16697695;16697544;16761498;16920548;16707221
GO:0051983	regulation of chromosome segregation	http://amigo.geneontology.org/amigo/term/GO:0051983	96	6	0.372028	16.1278	1.90087e-06	0.000512411	891;1062;4751;5347;9232;9787	geneontology_Biological_Process	16817017;16985599;16698984;16793225;16978568;16991741
GO:0005874	microtubule	http://amigo.geneontology.org/amigo/term/GO:0005874	385	10	1.49199	6.70246	2.13673e-06	0.000551066	1062;4751;5347;6790;9585;9928;10112;26586;259266;283431	geneontology_Cellular_Component	16989636;16817017;16697695;16698984;16697544;16978568;16920548;16755692;16775014;16707221
GO:0010965	regulation of mitotic sister chromatid separation	http://amigo.geneontology.org/amigo/term/GO:0010965	55	5	0.213141	23.4586	2.24869e-06	0.000551066	891;1062;5347;9232;9787	geneontology_Biological_Process	16817017;16985599;16793225;16978568;16991741
GO:0051310	metaphase plate congression	http://amigo.geneontology.org/amigo/term/GO:0051310	55	5	0.213141	23.4586	2.24869e-06	0.000551066	891;1062;9928;55143;81610	geneontology_Biological_Process	16697695;16985599;16978568;16913681;16662648
GO:0051306	mitotic sister chromatid separation	http://amigo.geneontology.org/amigo/term/GO:0051306	58	5	0.224767	22.2452	2.93547e-06	0.000698211	891;1062;5347;9232;9787	geneontology_Biological_Process	16817017;16985599;16793225;16978568;16991741
GO:0070507	regulation of microtubule cytoskeleton organization	http://amigo.geneontology.org/amigo/term/GO:0070507	165	7	0.639424	10.9474	3.41244e-06	0.000781295	4751;5347;6790;10274;26586;29899;79866	geneontology_Biological_Process	16817017;16959531;16698984;16775324;16920548;16775014;16668079
GO:1905818	regulation of chromosome separation	http://amigo.geneontology.org/amigo/term/GO:1905818	60	5	0.232518	21.5037	3.478e-06	0.000781295	891;1062;5347;9232;9787	geneontology_Biological_Process	16817017;16985599;16793225;16978568;16991741
GO:0098687	chromosomal region	http://amigo.geneontology.org/amigo/term/GO:0098687	321	9	1.24397	7.2349	3.89196e-06	0.000850657	891;1062;4751;5347;6790;10274;55143;80119;151246	geneontology_Cellular_Component	16817017;16985599;16959531;16698984;16978568;16920548;16810585;16662648;16889251
GO:0051225	spindle assembly	http://amigo.geneontology.org/amigo/term/GO:0051225	110	6	0.426283	14.0752	4.20963e-06	0.000895875	4751;5347;6790;10274;29899;259266	geneontology_Biological_Process	16817017;16959531;16698984;16697544;16920548;16668079
GO:0050909	sensory perception of taste	http://amigo.geneontology.org/amigo/term/GO:0050909	63	5	0.244144	20.4797	4.43618e-06	0.000919882	50838;50839;50840;259290;259296	geneontology_Biological_Process	16761518;16761502;16761498;16761495;16761507
GO:0000779	condensed chromosome, centromeric region	http://amigo.geneontology.org/amigo/term/GO:0000779	113	6	0.437908	13.7015	4.92088e-06	0.000994879	891;1062;4751;5347;6790;151246	geneontology_Cellular_Component	16817017;16985599;16698984;16978568;16920548;16889251
GO:0033047	regulation of mitotic sister chromatid segregation	http://amigo.geneontology.org/amigo/term/GO:0033047	66	5	0.25577	19.5488	5.59013e-06	0.00108993	891;1062;5347;9232;9787	geneontology_Biological_Process	16817017;16985599;16793225;16978568;16991741
GO:0090068	positive regulation of cell cycle process	http://amigo.geneontology.org/amigo/term/GO:0090068	252	8	0.976575	8.1919	5.6606e-06	0.00108993	891;6790;9585;9787;9928;29899;50838;81610	geneontology_Biological_Process	16697695;16985599;16793225;16761498;16920548;16913681;16707221;16668079
GO:0000086	G2/M transition of mitotic cell cycle	http://amigo.geneontology.org/amigo/term/GO:0000086	182	7	0.705304	9.9248	6.51644e-06	0.00122554	891;4751;5347;6790;7465;9928;79866	geneontology_Biological_Process	16817017;16697695;16985599;16698984;16775324;16920548;16721835
GO:0045787	positive regulation of cell cycle	http://amigo.geneontology.org/amigo/term/GO:0045787	353	9	1.36798	6.57905	8.39037e-06	0.00154211	891;6790;8900;9585;9787;9928;29899;50838;81610	geneontology_Biological_Process	16697695;16985599;16793225;16761498;16920548;16774053;16913681;16707221;16668079
GO:0032886	regulation of microtubule-based process	http://amigo.geneontology.org/amigo/term/GO:0032886	193	7	0.747932	9.35914	9.56756e-06	0.0017194	4751;5347;6790;10274;26586;29899;79866	geneontology_Biological_Process	16817017;16959531;16698984;16775324;16920548;16775014;16668079
GO:0060236	regulation of mitotic spindle organization	http://amigo.geneontology.org/amigo/term/GO:0060236	35	4	0.135635	29.4908	9.85175e-06	0.00173198	5347;10274;29899;79866	geneontology_Biological_Process	16817017;16959531;16775324;16668079
GO:0033045	regulation of sister chromatid segregation	http://amigo.geneontology.org/amigo/term/GO:0033045	75	5	0.290647	17.203	1.05096e-05	0.00180832	891;1062;5347;9232;9787	geneontology_Biological_Process	16817017;16985599;16793225;16978568;16991741
GO:0031145	anaphase-promoting complex-dependent catabolic process	http://amigo.geneontology.org/amigo/term/GO:0031145	36	4	0.139511	28.6716	1.1051e-05	0.00181285	891;5347;6790;9232	geneontology_Biological_Process	16817017;16985599;16920548;16991741
GO:0044772	mitotic cell cycle phase transition	http://amigo.geneontology.org/amigo/term/GO:0044772	464	10	1.79814	5.56131	1.10912e-05	0.00181285	891;1062;4751;5347;6790;7465;8900;9787;9928;79866	geneontology_Biological_Process	16817017;16697695;16985599;16698984;16793225;16775324;16978568;16920548;16774053;16721835
GO:1901987	regulation of cell cycle phase transition	http://amigo.geneontology.org/amigo/term/GO:1901987	366	9	1.41836	6.34536	1.12084e-05	0.00181285	891;1062;4751;5347;6790;7465;9787;9928;81610	geneontology_Biological_Process	16817017;16697695;16985599;16698984;16793225;16978568;16920548;16721835;16913681
GO:0044839	cell cycle G2/M phase transition	http://amigo.geneontology.org/amigo/term/GO:0044839	200	7	0.775059	9.03157	1.20657e-05	0.00191324	891;4751;5347;6790;7465;9928;79866	geneontology_Biological_Process	16817017;16697695;16985599;16698984;16775324;16920548;16721835
GO:0000281	mitotic cytokinesis	http://amigo.geneontology.org/amigo/term/GO:0000281	78	5	0.302273	16.5413	1.27404e-05	0.00198137	5347;5921;9585;10112;26586	geneontology_Biological_Process	16989636;16817017;16987008;16775014;16707221
GO:0090224	regulation of spindle organization	http://amigo.geneontology.org/amigo/term/GO:0090224	39	4	0.151137	26.4661	1.52966e-05	0.00233403	5347;10274;29899;79866	geneontology_Biological_Process	16817017;16959531;16775324;16668079
GO:0005875	microtubule associated complex	http://amigo.geneontology.org/amigo/term/GO:0005875	143	6	0.554167	10.8271	1.89953e-05	0.00284472	1062;6790;9585;9928;10112;55143	geneontology_Cellular_Component	16989636;16697695;16978568;16920548;16707221;16662648
GO:0000793	condensed chromosome	http://amigo.geneontology.org/amigo/term/GO:0000793	216	7	0.837064	8.36256	1.98532e-05	0.00291914	891;1062;4751;5347;6790;10274;151246	geneontology_Cellular_Component	16817017;16985599;16959531;16698984;16978568;16920548;16889251
GO:0007080	mitotic metaphase plate congression	http://amigo.geneontology.org/amigo/term/GO:0007080	43	4	0.166638	24.0042	2.26853e-05	0.00325566	891;1062;9928;55143	geneontology_Biological_Process	16697695;16985599;16978568;16662648
GO:0051304	chromosome separation	http://amigo.geneontology.org/amigo/term/GO:0051304	88	5	0.341026	14.6616	2.2947e-05	0.00325566	891;1062;5347;9232;9787	geneontology_Biological_Process	16817017;16985599;16793225;16978568;16991741
GO:0061640	cytoskeleton-dependent cytokinesis	http://amigo.geneontology.org/amigo/term/GO:0061640	91	5	0.352652	14.1783	2.6997e-05	0.00376422	5347;5921;9585;10112;26586	geneontology_Biological_Process	16989636;16817017;16987008;16775014;16707221
GO:0008017	microtubule binding	http://amigo.geneontology.org/amigo/term/GO:0008017	229	7	0.887443	7.88783	2.88916e-05	0.00396011	1062;5347;9585;9928;10112;81610;283431	geneontology_Molecular_Function	16989636;16817017;16697695;16978568;16755692;16913681;16707221
GO:0030071	regulation of mitotic metaphase/anaphase transition	http://amigo.geneontology.org/amigo/term/GO:0030071	50	4	0.193765	20.6436	4.14801e-05	0.00559083	891;1062;5347;9787	geneontology_Biological_Process	16817017;16985599;16793225;16978568
GO:0000777	condensed chromosome kinetochore	http://amigo.geneontology.org/amigo/term/GO:0000777	100	5	0.38753	12.9022	4.25484e-05	0.00564081	891;1062;4751;5347;151246	geneontology_Cellular_Component	16817017;16985599;16698984;16978568;16889251
GO:1901990	regulation of mitotic cell cycle phase transition	http://amigo.geneontology.org/amigo/term/GO:1901990	336	8	1.3021	6.14392	4.50239e-05	0.00576001	891;1062;4751;5347;6790;7465;9787;9928	geneontology_Biological_Process	16817017;16697695;16985599;16698984;16793225;16978568;16920548;16721835
GO:0140013	meiotic nuclear division	http://amigo.geneontology.org/amigo/term/GO:0140013	167	6	0.647175	9.27107	4.55125e-05	0.00576001	5347;6790;8900;9232;151246;259266	geneontology_Biological_Process	16817017;16697544;16920548;16774053;16991741;16889251
GO:0051321	meiotic cell cycle	http://amigo.geneontology.org/amigo/term/GO:0051321	246	7	0.953323	7.34274	4.55844e-05	0.00576001	4751;5347;6790;8900;9232;151246;259266	geneontology_Biological_Process	16817017;16698984;16697544;16920548;16774053;16991741;16889251
GO:1902099	regulation of metaphase/anaphase transition of cell cycle	http://amigo.geneontology.org/amigo/term/GO:1902099	52	4	0.201515	19.8496	4.84783e-05	0.00594006	891;1062;5347;9787	geneontology_Biological_Process	16817017;16985599;16793225;16978568
GO:0005871	kinesin complex	http://amigo.geneontology.org/amigo/term/GO:0005871	52	4	0.201515	19.8496	4.84783e-05	0.00594006	1062;9585;9928;10112	geneontology_Cellular_Component	16989636;16697695;16978568;16707221
GO:0007091	metaphase/anaphase transition of mitotic cell cycle	http://amigo.geneontology.org/amigo/term/GO:0007091	53	4	0.205391	19.4751	5.22833e-05	0.00631068	891;1062;5347;9787	geneontology_Biological_Process	16817017;16985599;16793225;16978568
GO:0044784	metaphase/anaphase transition of cell cycle	http://amigo.geneontology.org/amigo/term/GO:0044784	55	4	0.213141	18.7669	6.05414e-05	0.00719998	891;1062;5347;9787	geneontology_Biological_Process	16817017;16985599;16793225;16978568
GO:1903046	meiotic cell cycle process	http://amigo.geneontology.org/amigo/term/GO:1903046	184	6	0.713055	8.4145	7.80036e-05	0.00914224	5347;6790;8900;9232;151246;259266	geneontology_Biological_Process	16817017;16697544;16920548;16774053;16991741;16889251
GO:0051493	regulation of cytoskeleton organization	http://amigo.geneontology.org/amigo/term/GO:0051493	473	9	1.83302	4.90994	8.32023e-05	0.00961224	4751;5347;5921;6790;10274;26586;29899;79866;93663	geneontology_Biological_Process	16817017;16959531;16698984;16775324;16920548;16987008;16775014;16668079;17023484
GO:0000780	condensed nuclear chromosome, centromeric region	http://amigo.geneontology.org/amigo/term/GO:0000780	23	3	0.0891318	33.658	9.31957e-05	0.0106151	891;5347;6790	geneontology_Cellular_Component	16817017;16985599;16920548
GO:0005813	centrosome	http://amigo.geneontology.org/amigo/term/GO:0005813	481	9	1.86402	4.82828	9.45475e-05	0.0106195	891;4751;5347;6790;9585;9787;26586;29899;259266	geneontology_Cellular_Component	16817017;16985599;16698984;16697544;16793225;16920548;16775014;16707221;16668079
GO:0051642	centrosome localization	http://amigo.geneontology.org/amigo/term/GO:0051642	24	3	0.0930071	32.2556	0.000106214	0.0117665	6790;29899;259266	geneontology_Biological_Process	16697544;16920548;16668079
GO:0061842	microtubule organizing center localization	http://amigo.geneontology.org/amigo/term/GO:0061842	25	3	0.0968824	30.9654	0.000120364	0.0131538	6790;29899;259266	geneontology_Biological_Process	16697544;16920548;16668079
GO:0030695	GTPase regulator activity	http://amigo.geneontology.org/amigo/term/GO:0030695	291	7	1.12771	6.20726	0.000130592	0.0140812	4983;5921;9824;29899;55635;57636;93663	geneontology_Molecular_Function	16688386;16987008;17121496;17111738;16668079;16798919;17023484
GO:0000776	kinetochore	http://amigo.geneontology.org/amigo/term/GO:0000776	127	5	0.492163	10.1592	0.000132568	0.0141062	891;1062;4751;5347;151246	geneontology_Cellular_Component	16817017;16985599;16698984;16978568;16889251
GO:0090169	regulation of spindle assembly	http://amigo.geneontology.org/amigo/term/GO:0090169	26	3	0.100758	29.7744	0.000135687	0.0142507	5347;10274;29899	geneontology_Biological_Process	16817017;16959531;16668079
GO:0015631	tubulin binding	http://amigo.geneontology.org/amigo/term/GO:0015631	305	7	1.18197	5.92234	0.000174476	0.0180896	1062;5347;9585;9928;10112;81610;283431	geneontology_Molecular_Function	16989636;16817017;16697695;16978568;16755692;16913681;16707221
GO:0033044	regulation of chromosome organization	http://amigo.geneontology.org/amigo/term/GO:0033044	314	7	1.21684	5.75259	0.000208512	0.0211824	891;1062;4751;5347;9232;9787;80119	geneontology_Biological_Process	16817017;16985599;16698984;16793225;16978568;16991741;16810585
GO:0008608	attachment of spindle microtubules to kinetochore	http://amigo.geneontology.org/amigo/term/GO:0008608	30	3	0.116259	25.8045	0.000209545	0.0211824	891;1062;4751	geneontology_Biological_Process	16985599;16698984;16978568
GO:0010389	regulation of G2/M transition of mitotic cell cycle	http://amigo.geneontology.org/amigo/term/GO:0010389	141	5	0.546417	9.15052	0.000216212	0.0215865	891;4751;5347;6790;9928	geneontology_Biological_Process	16817017;16697695;16985599;16698984;16920548
GO:0032467	positive regulation of cytokinesis	http://amigo.geneontology.org/amigo/term/GO:0032467	31	3	0.120134	24.9721	0.000231355	0.0228166	9585;9928;50838	geneontology_Biological_Process	16697695;16761498;16707221
GO:1902806	regulation of cell cycle G1/S phase transition	http://amigo.geneontology.org/amigo/term/GO:1902806	144	5	0.558043	8.95989	0.000238437	0.0232319	891;6790;7465;9928;81610	geneontology_Biological_Process	16697695;16985599;16920548;16721835;16913681
GO:0003777	microtubule motor activity	http://amigo.geneontology.org/amigo/term/GO:0003777	81	4	0.313899	12.743	0.000273844	0.026364	1062;9585;9928;10112	geneontology_Molecular_Function	16989636;16697695;16978568;16707221
GO:0060589	nucleoside-triphosphatase regulator activity	http://amigo.geneontology.org/amigo/term/GO:0060589	331	7	1.28272	5.45714	0.000287401	0.0273437	4983;5921;9824;29899;55635;57636;93663	geneontology_Molecular_Function	16688386;16987008;17121496;17111738;16668079;16798919;17023484
GO:0044843	cell cycle G1/S phase transition	http://amigo.geneontology.org/amigo/term/GO:0044843	236	6	0.91457	6.56046	0.000302305	0.0284272	891;6790;7465;8900;9928;81610	geneontology_Biological_Process	16697695;16985599;16920548;16774053;16721835;16913681
GO:1902749	regulation of cell cycle G2/M phase transition	http://amigo.geneontology.org/amigo/term/GO:1902749	157	5	0.608422	8.21799	0.000355474	0.0330427	891;4751;5347;6790;9928	geneontology_Biological_Process	16817017;16697695;16985599;16698984;16920548
GO:2000816	negative regulation of mitotic sister chromatid separation	http://amigo.geneontology.org/amigo/term/GO:2000816	38	3	0.147261	20.372	0.000425862	0.0391357	891;5347;9232	geneontology_Biological_Process	16817017;16985599;16991741
GO:1905819	negative regulation of chromosome separation	http://amigo.geneontology.org/amigo/term/GO:1905819	39	3	0.151137	19.8496	0.000460076	0.0415181	891;5347;9232	geneontology_Biological_Process	16817017;16985599;16991741
GO:0051656	establishment of organelle localization	http://amigo.geneontology.org/amigo/term/GO:0051656	472	8	1.82914	4.37364	0.000462053	0.0415181	891;1062;9787;9928;22871;29899;55143;81610	geneontology_Biological_Process	16948063;16697695;16985599;16793225;16978568;16913681;16662648;16668079
GO:0033048	negative regulation of mitotic sister chromatid segregation	http://amigo.geneontology.org/amigo/term/GO:0033048	41	3	0.158887	18.8813	0.000533685	0.0474276	891;5347;9232	geneontology_Biological_Process	16817017;16985599;16991741
GO:0005096	GTPase activator activity	http://amigo.geneontology.org/amigo/term/GO:0005096	264	6	1.02308	5.86465	0.000548141	0.0481828	4983;5921;9824;55635;57636;93663	geneontology_Molecular_Function	16688386;16987008;17121496;17111738;16798919;17023484
GO:0010948	negative regulation of cell cycle process	http://amigo.geneontology.org/amigo/term/GO:0010948	266	6	1.03083	5.82056	0.000570333	0.0495944	891;4751;5347;6790;7465;9232	geneontology_Biological_Process	16817017;16985599;16698984;16920548;16991741;16721835

## Sheet: Table S39.CARMAweb_WG_down
Supplementary Table S39. List of GO terms identified by WebGestalt’s ORA using downregulated genes detected by CARMAweb - GSE113427
geneSet	description	link	size	overlap	expect	enrichmentRatio	pValue	FDR	overlapId	database	userId
GO:0005819	spindle	http://amigo.geneontology.org/amigo/term/GO:0005819	313	16	1.14055	14.0283	1.54321e-14	1.24799e-10	891;1062;4751;5347;6790;9585;9787;9928;10112;10274;26586;29899;55143;81610;81930;259266	geneontology_Cellular_Component	ASPM;AURKA;FAM83D;KIF20A;NEK2;STAG1;KIF14;KIF18A;GPSM2;DLGAP5;CCNB1;CDCA8;CKAP2;KIF20B;CENPE;PLK1
GO:0140014	mitotic nuclear division	http://amigo.geneontology.org/amigo/term/GO:0140014	272	14	0.99115	14.125	7.65166e-13	2.47743e-09	891;1062;4751;5347;6790;8900;9232;9585;9787;9928;10274;55143;79866;81930	geneontology_Biological_Process	AURKA;NEK2;STAG1;KIF14;KIF18A;DLGAP5;CCNA1;CCNB1;CDCA8;BORA;KIF20B;CENPE;PTTG1;PLK1
GO:0000280	nuclear division	http://amigo.geneontology.org/amigo/term/GO:0000280	408	16	1.48673	10.7619	9.19043e-13	2.47743e-09	891;1062;4751;5347;6790;8900;9232;9585;9787;9928;10274;55143;79866;81930;151246;259266	geneontology_Biological_Process	ASPM;AURKA;NEK2;STAG1;KIF14;KIF18A;DLGAP5;CCNA1;CCNB1;CDCA8;BORA;KIF20B;CENPE;SGO2;PTTG1;PLK1
GO:0000922	spindle pole	http://amigo.geneontology.org/amigo/term/GO:0000922	142	11	0.517439	21.2586	3.3149e-12	5.3644e-09	891;4751;5347;6790;9585;9787;10274;26586;29899;81610;259266	geneontology_Cellular_Component	ASPM;AURKA;FAM83D;NEK2;STAG1;GPSM2;DLGAP5;CCNB1;CKAP2;KIF20B;PLK1
GO:0048285	organelle fission	http://amigo.geneontology.org/amigo/term/GO:0048285	444	16	1.61791	9.88932	3.31668e-12	5.3644e-09	891;1062;4751;5347;6790;8900;9232;9585;9787;9928;10274;55143;79866;81930;151246;259266	geneontology_Biological_Process	ASPM;AURKA;NEK2;STAG1;KIF14;KIF18A;DLGAP5;CCNA1;CCNB1;CDCA8;BORA;KIF20B;CENPE;SGO2;PTTG1;PLK1
GO:0051233	spindle midzone	http://amigo.geneontology.org/amigo/term/GO:0051233	33	7	0.12025	58.2121	2.39927e-11	2.92332e-08	1062;5347;6790;9585;9928;55143;81930	geneontology_Cellular_Component	AURKA;KIF14;KIF18A;CDCA8;KIF20B;CENPE;PLK1
GO:0007088	regulation of mitotic nuclear division	http://amigo.geneontology.org/amigo/term/GO:0007088	171	11	0.623113	17.6533	2.53039e-11	2.92332e-08	891;1062;4751;5347;6790;8900;9232;9585;9787;10274;79866	geneontology_Biological_Process	AURKA;NEK2;STAG1;DLGAP5;CCNA1;CCNB1;BORA;KIF20B;CENPE;PTTG1;PLK1
GO:0051783	regulation of nuclear division	http://amigo.geneontology.org/amigo/term/GO:0051783	195	11	0.710567	15.4806	1.046e-10	1.05738e-07	891;1062;4751;5347;6790;8900;9232;9585;9787;10274;79866	geneontology_Biological_Process	AURKA;NEK2;STAG1;DLGAP5;CCNA1;CCNB1;BORA;KIF20B;CENPE;PTTG1;PLK1
GO:0097431	mitotic spindle pole	http://amigo.geneontology.org/amigo/term/GO:0097431	26	6	0.0947423	63.3297	3.98865e-10	3.58403e-07	6790;9585;10274;29899;81610;259266	geneontology_Cellular_Component	ASPM;AURKA;FAM83D;STAG1;GPSM2;KIF20B
GO:0000819	sister chromatid segregation	http://amigo.geneontology.org/amigo/term/GO:0000819	175	10	0.637689	15.6816	7.01509e-10	5.53494e-07	891;1062;4751;5347;9232;9787;9928;55143;81930;151246	geneontology_Biological_Process	NEK2;KIF14;KIF18A;DLGAP5;CCNB1;CDCA8;CENPE;SGO2;PTTG1;PLK1
GO:0007059	chromosome segregation	http://amigo.geneontology.org/amigo/term/GO:0007059	301	12	1.09682	10.9407	7.52867e-10	5.53494e-07	891;1062;4751;5347;9232;9787;9928;10274;55143;81610;81930;151246	geneontology_Biological_Process	FAM83D;NEK2;STAG1;KIF14;KIF18A;DLGAP5;CCNB1;CDCA8;CENPE;SGO2;PTTG1;PLK1
GO:0098813	nuclear chromosome segregation	http://amigo.geneontology.org/amigo/term/GO:0098813	247	11	0.900052	12.2215	1.29611e-09	8.73468e-07	891;1062;4751;5347;9232;9787;9928;55143;81610;81930;151246	geneontology_Biological_Process	FAM83D;NEK2;KIF14;KIF18A;DLGAP5;CCNB1;CDCA8;CENPE;SGO2;PTTG1;PLK1
GO:0072686	mitotic spindle	http://amigo.geneontology.org/amigo/term/GO:0072686	92	8	0.335242	23.8634	1.43728e-09	8.94096e-07	1062;6790;9585;10274;29899;81610;81930;259266	geneontology_Cellular_Component	ASPM;AURKA;FAM83D;STAG1;KIF18A;GPSM2;KIF20B;CENPE
GO:0000070	mitotic sister chromatid segregation	http://amigo.geneontology.org/amigo/term/GO:0000070	148	9	0.539302	16.6882	3.08652e-09	1.78291e-06	891;1062;4751;5347;9232;9787;9928;55143;81930	geneontology_Biological_Process	NEK2;KIF14;KIF18A;DLGAP5;CCNB1;CDCA8;CENPE;PTTG1;PLK1
GO:0007052	mitotic spindle organization	http://amigo.geneontology.org/amigo/term/GO:0007052	106	8	0.386257	20.7116	4.4754e-09	2.41284e-06	891;1062;4751;5347;6790;10274;29899;79866	geneontology_Biological_Process	AURKA;NEK2;STAG1;GPSM2;CCNB1;BORA;CENPE;PLK1
GO:0051303	establishment of chromosome localization	http://amigo.geneontology.org/amigo/term/GO:0051303	72	7	0.262363	26.6806	7.40585e-09	3.62333e-06	891;1062;9787;9928;55143;81610;81930	geneontology_Biological_Process	FAM83D;KIF14;KIF18A;DLGAP5;CCNB1;CDCA8;CENPE
GO:0030496	midbody	http://amigo.geneontology.org/amigo/term/GO:0030496	164	9	0.597605	15.0601	7.61674e-09	3.62333e-06	1062;4751;5347;6790;9585;9928;10112;55143;259266	geneontology_Cellular_Component	ASPM;AURKA;KIF20A;NEK2;KIF14;CDCA8;KIF20B;CENPE;PLK1
GO:0050000	chromosome localization	http://amigo.geneontology.org/amigo/term/GO:0050000	73	7	0.266007	26.3151	8.16808e-09	3.66974e-06	891;1062;9787;9928;55143;81610;81930	geneontology_Biological_Process	FAM83D;KIF14;KIF18A;DLGAP5;CCNB1;CDCA8;CENPE
GO:0007051	spindle organization	http://amigo.geneontology.org/amigo/term/GO:0007051	169	9	0.615825	14.6145	9.90689e-09	4.21668e-06	891;1062;4751;5347;6790;10274;29899;79866;259266	geneontology_Biological_Process	ASPM;AURKA;NEK2;STAG1;GPSM2;CCNB1;BORA;CENPE;PLK1
GO:1902850	microtubule cytoskeleton organization involved in mitosis	http://amigo.geneontology.org/amigo/term/GO:1902850	127	8	0.46278	17.2868	1.87398e-08	7.57745e-06	891;1062;4751;5347;6790;10274;29899;79866	geneontology_Biological_Process	AURKA;NEK2;STAG1;GPSM2;CCNB1;BORA;CENPE;PLK1
GO:0000775	chromosome, centromeric region	http://amigo.geneontology.org/amigo/term/GO:0000775	187	9	0.681416	13.2078	2.39127e-08	9.20868e-06	891;1062;4751;5347;6790;10274;55143;81930;151246	geneontology_Cellular_Component	AURKA;NEK2;STAG1;KIF18A;CCNB1;CDCA8;CENPE;SGO2;PLK1
GO:0051310	metaphase plate congression	http://amigo.geneontology.org/amigo/term/GO:0051310	55	6	0.200416	29.9377	4.62663e-08	1.70071e-05	891;1062;9928;55143;81610;81930	geneontology_Biological_Process	FAM83D;KIF14;KIF18A;CCNB1;CDCA8;CENPE
GO:0005874	microtubule	http://amigo.geneontology.org/amigo/term/GO:0005874	385	11	1.40292	7.84082	1.26271e-07	4.4398e-05	1062;4751;5347;6790;9585;9928;10112;26586;81930;259266;283431	geneontology_Cellular_Component	ASPM;AURKA;KIF20A;NEK2;KIF14;KIF18A;CKAP2;KIF20B;CENPE;GAS2L3;PLK1
GO:0070507	regulation of microtubule cytoskeleton organization	http://amigo.geneontology.org/amigo/term/GO:0070507	165	8	0.601249	13.3056	1.43948e-07	4.85046e-05	4751;5347;6790;10274;26586;29899;79866;81930	geneontology_Biological_Process	AURKA;NEK2;STAG1;KIF18A;GPSM2;CKAP2;BORA;PLK1
GO:0098687	chromosomal region	http://amigo.geneontology.org/amigo/term/GO:0098687	321	10	1.1697	8.54918	2.26316e-07	7.32085e-05	891;1062;4751;5347;6790;10274;55143;80119;81930;151246	geneontology_Cellular_Component	AURKA;NEK2;STAG1;KIF18A;CCNB1;CDCA8;CENPE;PIF1;SGO2;PLK1
GO:0000086	G2/M transition of mitotic cell cycle	http://amigo.geneontology.org/amigo/term/GO:0000086	182	8	0.663196	12.0628	3.05512e-07	9.50259e-05	891;3161;4751;5347;6790;7465;9928;79866	geneontology_Biological_Process	HMMR;AURKA;NEK2;KIF14;CCNB1;BORA;WEE1;PLK1
GO:0007080	mitotic metaphase plate congression	http://amigo.geneontology.org/amigo/term/GO:0007080	43	5	0.156689	31.9103	4.72851e-07	0.000138003	891;1062;9928;55143;81930	geneontology_Biological_Process	KIF14;KIF18A;CCNB1;CDCA8;CENPE
GO:0032886	regulation of microtubule-based process	http://amigo.geneontology.org/amigo/term/GO:0032886	193	8	0.70328	11.3753	4.77813e-07	0.000138003	4751;5347;6790;10274;26586;29899;79866;81930	geneontology_Biological_Process	AURKA;NEK2;STAG1;KIF18A;GPSM2;CKAP2;BORA;PLK1
GO:0044839	cell cycle G2/M phase transition	http://amigo.geneontology.org/amigo/term/GO:0044839	200	8	0.728787	10.9771	6.26133e-07	0.000174605	891;3161;4751;5347;6790;7465;9928;79866	geneontology_Biological_Process	HMMR;AURKA;NEK2;KIF14;CCNB1;BORA;WEE1;PLK1
GO:1901987	regulation of cell cycle phase transition	http://amigo.geneontology.org/amigo/term/GO:1901987	366	10	1.33368	7.49805	7.53397e-07	0.000203091	891;1062;3161;4751;5347;6790;7465;9787;9928;81610	geneontology_Biological_Process	HMMR;AURKA;FAM83D;NEK2;KIF14;DLGAP5;CCNB1;CENPE;WEE1;PLK1
GO:0044772	mitotic cell cycle phase transition	http://amigo.geneontology.org/amigo/term/GO:0044772	464	11	1.69079	6.50585	8.08394e-07	0.000210886	891;1062;3161;4751;5347;6790;7465;8900;9787;9928;79866	geneontology_Biological_Process	HMMR;AURKA;NEK2;KIF14;DLGAP5;CCNA1;CCNB1;BORA;CENPE;WEE1;PLK1
GO:0005875	microtubule associated complex	http://amigo.geneontology.org/amigo/term/GO:0005875	143	7	0.521083	13.4336	8.58821e-07	0.00021704	1062;6790;9585;9928;10112;55143;81930	geneontology_Cellular_Component	AURKA;KIF20A;KIF14;KIF18A;CDCA8;KIF20B;CENPE
GO:0000910	cytokinesis	http://amigo.geneontology.org/amigo/term/GO:0000910	150	7	0.54659	12.8067	1.18473e-06	0.000287652	5347;5921;6790;9585;9928;10112;26586	geneontology_Biological_Process	AURKA;KIF20A;KIF14;CKAP2;KIF20B;RASA1;PLK1
GO:0051302	regulation of cell division	http://amigo.geneontology.org/amigo/term/GO:0051302	151	7	0.550234	12.7219	1.2388e-06	0.000287652	2250;5347;6790;9585;9928;10112;259266	geneontology_Biological_Process	ASPM;AURKA;KIF20A;KIF14;KIF20B;FGF5;PLK1
GO:0005871	kinesin complex	http://amigo.geneontology.org/amigo/term/GO:0005871	52	5	0.189485	26.3874	1.24494e-06	0.000287652	1062;9585;9928;10112;81930	geneontology_Cellular_Component	KIF20A;KIF14;KIF18A;KIF20B;CENPE
GO:0051983	regulation of chromosome segregation	http://amigo.geneontology.org/amigo/term/GO:0051983	96	6	0.349818	17.1518	1.3175e-06	0.000295962	891;1062;4751;5347;9232;9787	geneontology_Biological_Process	NEK2;DLGAP5;CCNB1;CENPE;PTTG1;PLK1
GO:0010965	regulation of mitotic sister chromatid separation	http://amigo.geneontology.org/amigo/term/GO:0010965	55	5	0.200416	24.9481	1.65246e-06	0.000361174	891;1062;5347;9232;9787	geneontology_Biological_Process	DLGAP5;CCNB1;CENPE;PTTG1;PLK1
GO:0008017	microtubule binding	http://amigo.geneontology.org/amigo/term/GO:0008017	229	8	0.834461	9.58702	1.73464e-06	0.000369158	1062;5347;9585;9928;10112;81610;81930;283431	geneontology_Molecular_Function	FAM83D;KIF20A;KIF14;KIF18A;KIF20B;CENPE;GAS2L3;PLK1
GO:0051306	mitotic sister chromatid separation	http://amigo.geneontology.org/amigo/term/GO:0051306	58	5	0.211348	23.6576	2.15839e-06	0.000447561	891;1062;5347;9232;9787	geneontology_Biological_Process	DLGAP5;CCNB1;CENPE;PTTG1;PLK1
GO:0140013	meiotic nuclear division	http://amigo.geneontology.org/amigo/term/GO:0140013	167	7	0.608537	11.503	2.42876e-06	0.000491035	5347;6790;8900;9232;81930;151246;259266	geneontology_Biological_Process	ASPM;AURKA;KIF18A;CCNA1;SGO2;PTTG1;PLK1
GO:1905818	regulation of chromosome separation	http://amigo.geneontology.org/amigo/term/GO:1905818	60	5	0.218636	22.869	2.55828e-06	0.000504605	891;1062;5347;9232;9787	geneontology_Biological_Process	DLGAP5;CCNB1;CENPE;PTTG1;PLK1
GO:0051225	spindle assembly	http://amigo.geneontology.org/amigo/term/GO:0051225	110	6	0.400833	14.9688	2.92579e-06	0.000556018	4751;5347;6790;10274;29899;259266	geneontology_Biological_Process	ASPM;AURKA;NEK2;STAG1;GPSM2;PLK1
GO:0051321	meiotic cell cycle	http://amigo.geneontology.org/amigo/term/GO:0051321	246	8	0.896408	8.92451	2.95645e-06	0.000556018	4751;5347;6790;8900;9232;81930;151246;259266	geneontology_Biological_Process	ASPM;AURKA;NEK2;KIF18A;CCNA1;SGO2;PTTG1;PLK1
GO:1901990	regulation of mitotic cell cycle phase transition	http://amigo.geneontology.org/amigo/term/GO:1901990	336	9	1.22436	7.35077	3.34053e-06	0.000613974	891;1062;3161;4751;5347;6790;7465;9787;9928	geneontology_Biological_Process	HMMR;AURKA;NEK2;KIF14;DLGAP5;CCNB1;CENPE;WEE1;PLK1
GO:0000779	condensed chromosome, centromeric region	http://amigo.geneontology.org/amigo/term/GO:0000779	113	6	0.411765	14.5714	3.42216e-06	0.000615	891;1062;4751;5347;6790;151246	geneontology_Cellular_Component	AURKA;NEK2;CCNB1;CENPE;SGO2;PLK1
GO:0033047	regulation of mitotic sister chromatid segregation	http://amigo.geneontology.org/amigo/term/GO:0033047	66	5	0.2405	20.79	4.11661e-06	0.000723718	891;1062;5347;9232;9787	geneontology_Biological_Process	DLGAP5;CCNB1;CENPE;PTTG1;PLK1
GO:1903046	meiotic cell cycle process	http://amigo.geneontology.org/amigo/term/GO:1903046	184	7	0.670484	10.4402	4.61629e-06	0.000794296	5347;6790;8900;9232;81930;151246;259266	geneontology_Biological_Process	ASPM;AURKA;KIF18A;CCNA1;SGO2;PTTG1;PLK1
GO:0000776	kinetochore	http://amigo.geneontology.org/amigo/term/GO:0000776	127	6	0.46278	12.9651	6.73004e-06	0.00113387	891;1062;4751;5347;81930;151246	geneontology_Cellular_Component	NEK2;KIF18A;CCNB1;CENPE;SGO2;PLK1
GO:0051493	regulation of cytoskeleton organization	http://amigo.geneontology.org/amigo/term/GO:0051493	473	10	1.72358	5.80187	7.44527e-06	0.00122877	4751;5347;5921;6790;10274;26586;29899;79866;81930;93663	geneontology_Biological_Process	AURKA;NEK2;STAG1;KIF18A;GPSM2;CKAP2;BORA;RASA1;ARHGAP18;PLK1
GO:0060236	regulation of mitotic spindle organization	http://amigo.geneontology.org/amigo/term/GO:0060236	35	4	0.127538	31.3633	7.70029e-06	0.00122934	5347;10274;29899;79866	geneontology_Biological_Process	STAG1;GPSM2;BORA;PLK1
GO:0033045	regulation of sister chromatid segregation	http://amigo.geneontology.org/amigo/term/GO:0033045	75	5	0.273295	18.2952	7.75273e-06	0.00122934	891;1062;5347;9232;9787	geneontology_Biological_Process	DLGAP5;CCNB1;CENPE;PTTG1;PLK1
GO:0032465	regulation of cytokinesis	http://amigo.geneontology.org/amigo/term/GO:0032465	76	5	0.276939	18.0545	8.27554e-06	0.00128701	5347;6790;9585;9928;10112	geneontology_Biological_Process	AURKA;KIF20A;KIF14;KIF20B;PLK1
GO:0005813	centrosome	http://amigo.geneontology.org/amigo/term/GO:0005813	481	10	1.75273	5.70538	8.62169e-06	0.0012938	891;3161;4751;5347;6790;9585;9787;26586;29899;259266	geneontology_Cellular_Component	ASPM;HMMR;AURKA;NEK2;GPSM2;DLGAP5;CCNB1;CKAP2;KIF20B;PLK1
GO:0031145	anaphase-promoting complex-dependent catabolic process	http://amigo.geneontology.org/amigo/term/GO:0031145	36	4	0.131182	30.4921	8.63922e-06	0.0012938	891;5347;6790;9232	geneontology_Biological_Process	AURKA;CCNB1;PTTG1;PLK1
GO:0000281	mitotic cytokinesis	http://amigo.geneontology.org/amigo/term/GO:0000281	78	5	0.284227	17.5916	9.40372e-06	0.00138269	5347;5921;9585;10112;26586	geneontology_Biological_Process	KIF20A;CKAP2;KIF20B;RASA1;PLK1
GO:0003777	microtubule motor activity	http://amigo.geneontology.org/amigo/term/GO:0003777	81	5	0.295159	16.94	1.13176e-05	0.00163439	1062;9585;9928;10112;81930	geneontology_Molecular_Function	KIF20A;KIF14;KIF18A;KIF20B;CENPE
GO:0090224	regulation of spindle organization	http://amigo.geneontology.org/amigo/term/GO:0090224	39	4	0.142113	28.1465	1.19649e-05	0.00169755	5347;10274;29899;79866	geneontology_Biological_Process	STAG1;GPSM2;BORA;PLK1
GO:0010389	regulation of G2/M transition of mitotic cell cycle	http://amigo.geneontology.org/amigo/term/GO:0010389	141	6	0.513795	11.6778	1.2262e-05	0.0017097	891;3161;4751;5347;6790;9928	geneontology_Biological_Process	HMMR;AURKA;NEK2;KIF14;CCNB1;PLK1
GO:1990023	mitotic spindle midzone	http://amigo.geneontology.org/amigo/term/GO:1990023	13	3	0.0473712	63.3297	1.28493e-05	0.00176123	1062;9585;81930	geneontology_Cellular_Component	KIF18A;KIF20B;CENPE
GO:0000793	condensed chromosome	http://amigo.geneontology.org/amigo/term/GO:0000793	216	7	0.78709	8.89352	1.31755e-05	0.00177584	891;1062;4751;5347;6790;10274;151246	geneontology_Cellular_Component	AURKA;NEK2;STAG1;CCNB1;CENPE;SGO2;PLK1
GO:0015631	tubulin binding	http://amigo.geneontology.org/amigo/term/GO:0015631	305	8	1.1114	7.19813	1.42749e-05	0.00189247	1062;5347;9585;9928;10112;81610;81930;283431	geneontology_Molecular_Function	FAM83D;KIF20A;KIF14;KIF18A;KIF20B;CENPE;GAS2L3;PLK1
GO:0051304	chromosome separation	http://amigo.geneontology.org/amigo/term/GO:0051304	88	5	0.320666	15.5925	1.69698e-05	0.00221346	891;1062;5347;9232;9787	geneontology_Biological_Process	DLGAP5;CCNB1;CENPE;PTTG1;PLK1
GO:0061640	cytoskeleton-dependent cytokinesis	http://amigo.geneontology.org/amigo/term/GO:0061640	91	5	0.331598	15.0785	1.99763e-05	0.00256426	5347;5921;9585;10112;26586	geneontology_Biological_Process	KIF20A;CKAP2;KIF20B;RASA1;PLK1
GO:1902749	regulation of cell cycle G2/M phase transition	http://amigo.geneontology.org/amigo/term/GO:1902749	157	6	0.572098	10.4877	2.25856e-05	0.00285391	891;3161;4751;5347;6790;9928	geneontology_Biological_Process	HMMR;AURKA;NEK2;KIF14;CCNB1;PLK1
GO:0000777	condensed chromosome kinetochore	http://amigo.geneontology.org/amigo/term/GO:0000777	100	5	0.364394	13.7214	3.15377e-05	0.00392378	891;1062;4751;5347;151246	geneontology_Cellular_Component	NEK2;CCNB1;CENPE;SGO2;PLK1
GO:0030071	regulation of mitotic metaphase/anaphase transition	http://amigo.geneontology.org/amigo/term/GO:0030071	50	4	0.182197	21.9543	3.25113e-05	0.00398362	891;1062;5347;9787	geneontology_Biological_Process	DLGAP5;CCNB1;CENPE;PLK1
GO:0005876	spindle microtubule	http://amigo.geneontology.org/amigo/term/GO:0005876	51	4	0.185841	21.5238	3.51822e-05	0.00422085	1062;5347;6790;81930	geneontology_Cellular_Component	AURKA;KIF18A;CENPE;PLK1
GO:0090068	positive regulation of cell cycle process	http://amigo.geneontology.org/amigo/term/GO:0090068	252	7	0.918272	7.62302	3.54912e-05	0.00422085	891;6790;9585;9787;9928;29899;81610	geneontology_Biological_Process	AURKA;FAM83D;KIF14;GPSM2;DLGAP5;CCNB1;KIF20B
GO:1902099	regulation of metaphase/anaphase transition of cell cycle	http://amigo.geneontology.org/amigo/term/GO:1902099	52	4	0.189485	21.1099	3.80103e-05	0.00445491	891;1062;5347;9787	geneontology_Biological_Process	DLGAP5;CCNB1;CENPE;PLK1
GO:0045787	positive regulation of cell cycle	http://amigo.geneontology.org/amigo/term/GO:0045787	353	8	1.28631	6.21934	4.06044e-05	0.0046701	891;6790;8900;9585;9787;9928;29899;81610	geneontology_Biological_Process	AURKA;FAM83D;KIF14;GPSM2;DLGAP5;CCNA1;CCNB1;KIF20B
GO:0007091	metaphase/anaphase transition of mitotic cell cycle	http://amigo.geneontology.org/amigo/term/GO:0007091	53	4	0.193129	20.7116	4.10013e-05	0.0046701	891;1062;5347;9787	geneontology_Biological_Process	DLGAP5;CCNB1;CENPE;PLK1
GO:0044784	metaphase/anaphase transition of cell cycle	http://amigo.geneontology.org/amigo/term/GO:0044784	55	4	0.200416	19.9584	4.74948e-05	0.00533459	891;1062;5347;9787	geneontology_Biological_Process	DLGAP5;CCNB1;CENPE;PLK1
GO:0051656	establishment of organelle localization	http://amigo.geneontology.org/amigo/term/GO:0051656	472	9	1.71994	5.23275	4.99027e-05	0.00552827	891;1062;9787;9928;22871;29899;55143;81610;81930	geneontology_Biological_Process	FAM83D;KIF14;KIF18A;GPSM2;DLGAP5;CCNB1;CDCA8;CENPE;NLGN1
GO:0000780	condensed nuclear chromosome, centromeric region	http://amigo.geneontology.org/amigo/term/GO:0000780	23	3	0.0838105	35.795	7.75234e-05	0.00847205	891;5347;6790	geneontology_Cellular_Component	AURKA;CCNB1;PLK1
GO:0051642	centrosome localization	http://amigo.geneontology.org/amigo/term/GO:0051642	24	3	0.0874545	34.3036	8.83681e-05	0.00952844	6790;29899;259266	geneontology_Biological_Process	ASPM;AURKA;GPSM2
GO:0061842	microtubule organizing center localization	http://amigo.geneontology.org/amigo/term/GO:0061842	25	3	0.0910984	32.9314	0.000100158	0.0105192	6790;29899;259266	geneontology_Biological_Process	ASPM;AURKA;GPSM2
GO:0008574	ATP-dependent microtubule motor activity, plus-end-directed	http://amigo.geneontology.org/amigo/term/GO:0008574	25	3	0.0910984	32.9314	0.000100158	0.0105192	9585;9928;81930	geneontology_Molecular_Function	KIF14;KIF18A;KIF20B
GO:0090169	regulation of spindle assembly	http://amigo.geneontology.org/amigo/term/GO:0090169	26	3	0.0947423	31.6648	0.000112928	0.0117083	5347;10274;29899	geneontology_Biological_Process	STAG1;GPSM2;PLK1
GO:0003774	motor activity	http://amigo.geneontology.org/amigo/term/GO:0003774	133	5	0.484643	10.3169	0.000122793	0.01257	1062;9585;9928;10112;81930	geneontology_Molecular_Function	KIF20A;KIF14;KIF18A;KIF20B;CENPE
GO:0033044	regulation of chromosome organization	http://amigo.geneontology.org/amigo/term/GO:0033044	314	7	1.1442	6.11783	0.00014112	0.0142655	891;1062;4751;5347;9232;9787;80119	geneontology_Biological_Process	NEK2;DLGAP5;CCNB1;CENPE;PIF1;PTTG1;PLK1
GO:0008608	attachment of spindle microtubules to kinetochore	http://amigo.geneontology.org/amigo/term/GO:0008608	30	3	0.109318	27.4429	0.000174518	0.0174238	891;1062;4751	geneontology_Biological_Process	NEK2;CCNB1;CENPE
GO:1902806	regulation of cell cycle G1/S phase transition	http://amigo.geneontology.org/amigo/term/GO:1902806	144	5	0.524727	9.52877	0.000178222	0.0175766	891;6790;7465;9928;81610	geneontology_Biological_Process	AURKA;FAM83D;KIF14;CCNB1;WEE1
GO:0044843	cell cycle G1/S phase transition	http://amigo.geneontology.org/amigo/term/GO:0044843	236	6	0.859969	6.977	0.000215368	0.0209841	891;6790;7465;8900;9928;81610	geneontology_Biological_Process	AURKA;FAM83D;KIF14;CCNA1;CCNB1;WEE1
GO:0007018	microtubule-based movement	http://amigo.geneontology.org/amigo/term/GO:0007018	256	6	0.932847	6.43192	0.000333296	0.0320877	1062;9585;9787;9928;10112;81930	geneontology_Biological_Process	KIF20A;KIF14;KIF18A;DLGAP5;KIF20B;CENPE
GO:2000816	negative regulation of mitotic sister chromatid separation	http://amigo.geneontology.org/amigo/term/GO:2000816	38	3	0.13847	21.6654	0.000355165	0.0337908	891;5347;9232	geneontology_Biological_Process	CCNB1;PTTG1;PLK1
GO:1905819	negative regulation of chromosome separation	http://amigo.geneontology.org/amigo/term/GO:1905819	39	3	0.142113	21.1099	0.000383764	0.0360872	891;5347;9232	geneontology_Biological_Process	CCNB1;PTTG1;PLK1
GO:0010948	negative regulation of cell cycle process	http://amigo.geneontology.org/amigo/term/GO:0010948	266	6	0.969287	6.19012	0.000408696	0.0379899	891;4751;5347;6790;7465;9232	geneontology_Biological_Process	AURKA;NEK2;CCNB1;PTTG1;WEE1;PLK1
GO:0007019	microtubule depolymerization	http://amigo.geneontology.org/amigo/term/GO:0007019	41	3	0.149401	20.0801	0.000445318	0.0404639	9928;26586;81930	geneontology_Biological_Process	KIF14;KIF18A;CKAP2
GO:0033048	negative regulation of mitotic sister chromatid segregation	http://amigo.geneontology.org/amigo/term/GO:0033048	41	3	0.149401	20.0801	0.000445318	0.0404639	891;5347;9232	geneontology_Biological_Process	CCNB1;PTTG1;PLK1
GO:0000794	condensed nuclear chromosome	http://amigo.geneontology.org/amigo/term/GO:0000794	99	4	0.36075	11.088	0.000465078	0.0417898	891;4751;5347;6790	geneontology_Cellular_Component	AURKA;NEK2;CCNB1;PLK1
GO:0033046	negative regulation of sister chromatid segregation	http://amigo.geneontology.org/amigo/term/GO:0033046	43	3	0.156689	19.1462	0.000512874	0.0450827	891;5347;9232	geneontology_Biological_Process	CCNB1;PTTG1;PLK1
GO:1990939	ATP-dependent microtubule motor activity	http://amigo.geneontology.org/amigo/term/GO:1990939	43	3	0.156689	19.1462	0.000512874	0.0450827	9585;9928;81930	geneontology_Molecular_Function	KIF14;KIF18A;KIF20B
GO:0051985	negative regulation of chromosome segregation	http://amigo.geneontology.org/amigo/term/GO:0051985	44	3	0.160333	18.711	0.000548976	0.0477373	891;5347;9232	geneontology_Biological_Process	CCNB1;PTTG1;PLK1
GO:0051657	maintenance of organelle location	http://amigo.geneontology.org/amigo/term/GO:0051657	10	2	0.0364394	54.8857	0.000577105	0.048615	29899;259266	geneontology_Biological_Process	ASPM;GPSM2
GO:0035404	histone-serine phosphorylation	http://amigo.geneontology.org/amigo/term/GO:0035404	10	2	0.0364394	54.8857	0.000577105	0.048615	891;6790	geneontology_Biological_Process	AURKA;CCNB1
GO:0072687	meiotic spindle	http://amigo.geneontology.org/amigo/term/GO:0072687	10	2	0.0364394	54.8857	0.000577105	0.048615	6790;259266	geneontology_Cellular_Component	ASPM;AURKA

## Sheet: Table S40.DExplore_WG_up
Supplementary Table S40. List of GO terms identified by WebGestalt’s ORA using upregulated genes detected by DExplore - GSE113427
geneSet	description	link	size	overlap	expect	enrichmentRatio	pValue	FDR	overlapId	database	userId
GO:0016054	organic acid catabolic process	http://amigo.geneontology.org/amigo/term/GO:0016054	245	8	0.892764	8.96093	2.86844e-06	0.0115986	2110;3620;5446;7263;113675;122970;126129;171586	geneontology_Biological_Process	16864275;16934671;16971943;16854202;17059911;16786264;16757493;17068296
GO:0046395	carboxylic acid catabolic process	http://amigo.geneontology.org/amigo/term/GO:0046395	245	8	0.892764	8.96093	2.86844e-06	0.0115986	2110;3620;5446;7263;113675;122970;126129;171586	geneontology_Biological_Process	16864275;16934671;16971943;16854202;17059911;16786264;16757493;17068296
GO:0032496	response to lipopolysaccharide	http://amigo.geneontology.org/amigo/term/GO:0032496	301	8	1.09682	7.29378	1.2975e-05	0.0349763	2643;3620;6373;7128;7538;11009;23643;23729	geneontology_Biological_Process	16861997;16839757;17070061;16793176;16676682;17068296;17012946;16977058
GO:0002237	response to molecule of bacterial origin	http://amigo.geneontology.org/amigo/term/GO:0002237	314	8	1.1442	6.99181	1.76058e-05	0.0355945	2643;3620;6373;7128;7538;11009;23643;23729	geneontology_Biological_Process	16861997;16839757;17070061;16793176;16676682;17068296;17012946;16977058

## Sheet: Table S41.GEO2R_WG_up
Supplementary Table S41. List of GO terms identified by WebGestalt’s ORA using upregulated genes detected by GEO2R - GSE113427
geneSet	description	link	size	overlap	expect	enrichmentRatio	pValue	FDR	overlapId	database	userId
GO:0016054	organic acid catabolic process	http://amigo.geneontology.org/amigo/term/GO:0016054	245	7	0.566834	12.3493	1.31806e-06	0.00532957	2110;5446;7263;113675;122970;126129;171586	geneontology_Biological_Process	16864275;16934671;17059911;16971943;16786264;16757493;16854202
GO:0046395	carboxylic acid catabolic process	http://amigo.geneontology.org/amigo/term/GO:0046395	245	7	0.566834	12.3493	1.31806e-06	0.00532957	2110;5446;7263;113675;122970;126129;171586	geneontology_Biological_Process	16864275;16934671;17059911;16971943;16786264;16757493;16854202
GO:0006631	fatty acid metabolic process	http://amigo.geneontology.org/amigo/term/GO:0006631	329	7	0.761178	9.19628	9.21285e-06	0.0248348	672;2110;5446;22949;122970;126129;171586	geneontology_Biological_Process	16864275;17097211;16845349;17059911;16971943;16786264;16854202

## Sheet: Table S42.CARMAweb_WG_up
Supplementary Table S42. List of GO terms identified by WebGestalt’s ORA using upregulated genes detected by CARMAweb - GSE113427
No significant results are found under threshold fdr 0.05.

## Sheet: Table S43.DExplore-GEO2R_all
Supplementary Table S43. List of GO terms identified by WebGestalt’s ORA using all DEGs detected by both DExplore and GEO2R - GSE113427
geneSet	description
GO:0140014	mitotic nuclear division
GO:0000280	nuclear division
GO:0007088	regulation of mitotic nuclear division
GO:0048285	organelle fission
GO:0051783	regulation of nuclear division
GO:0000922	spindle pole
GO:0005819	spindle
GO:0000819	sister chromatid segregation
GO:0000070	mitotic sister chromatid segregation
GO:1902850	microtubule cytoskeleton organization involved in mitosis
GO:0098813	nuclear chromosome segregation
GO:0051233	spindle midzone
GO:0000775	chromosome, centromeric region
GO:0031145	anaphase-promoting complex-dependent catabolic process
GO:0007059	chromosome segregation
GO:0007052	mitotic spindle organization
GO:0007051	spindle organization
GO:0097431	mitotic spindle pole
GO:0044772	mitotic cell cycle phase transition
GO:0051303	establishment of chromosome localization
GO:0050000	chromosome localization
GO:0098687	chromosomal region
GO:0010965	regulation of mitotic sister chromatid separation
GO:0051310	metaphase plate congression
GO:0051306	mitotic sister chromatid separation
GO:0000779	condensed chromosome, centromeric region
GO:1905818	regulation of chromosome separation
GO:0000780	condensed nuclear chromosome, centromeric region
GO:0072686	mitotic spindle
GO:0007080	mitotic metaphase plate congression
GO:0033047	regulation of mitotic sister chromatid segregation
GO:1901987	regulation of cell cycle phase transition
GO:0051983	regulation of chromosome segregation
GO:0030496	midbody
GO:0070507	regulation of microtubule cytoskeleton organization
GO:0000777	condensed chromosome kinetochore
GO:1901990	regulation of mitotic cell cycle phase transition
GO:0033045	regulation of sister chromatid segregation
GO:0030071	regulation of mitotic metaphase/anaphase transition
GO:1902099	regulation of metaphase/anaphase transition of cell cycle
GO:0045787	positive regulation of cell cycle
GO:0007091	metaphase/anaphase transition of mitotic cell cycle
GO:0000086	G2/M transition of mitotic cell cycle
GO:0044784	metaphase/anaphase transition of cell cycle
GO:0060236	regulation of mitotic spindle organization
GO:0032886	regulation of microtubule-based process
GO:0051304	chromosome separation
GO:0044839	cell cycle G2/M phase transition
GO:0090224	regulation of spindle organization
GO:0000793	condensed chromosome
GO:0010389	regulation of G2/M transition of mitotic cell cycle
GO:0051225	spindle assembly
GO:0000281	mitotic cytokinesis
GO:0000910	cytokinesis
GO:0005874	microtubule
GO:0005871	kinesin complex
GO:0008527	taste receptor activity
GO:0090068	positive regulation of cell cycle process
GO:0061640	cytoskeleton-dependent cytokinesis
GO:0050909	sensory perception of taste
GO:0000794	condensed nuclear chromosome
GO:0005875	microtubule associated complex

[truncated: 4 more sheets: Table S44.DExplore-GEO2R_down, Table S45.DExplore-GEO2R_up, Table S46.DExplore-CARMAweb_all, Table S47.DExplore-CARMA_down]
